# Supplementary material for: Economic costs of invasive rodents worldwide: the tip of the iceberg
Source: PeerJ journal article supplement (doi:10.7717/peerj.14935), 2023-03-24

(a)

Annual costs in US\$ millions

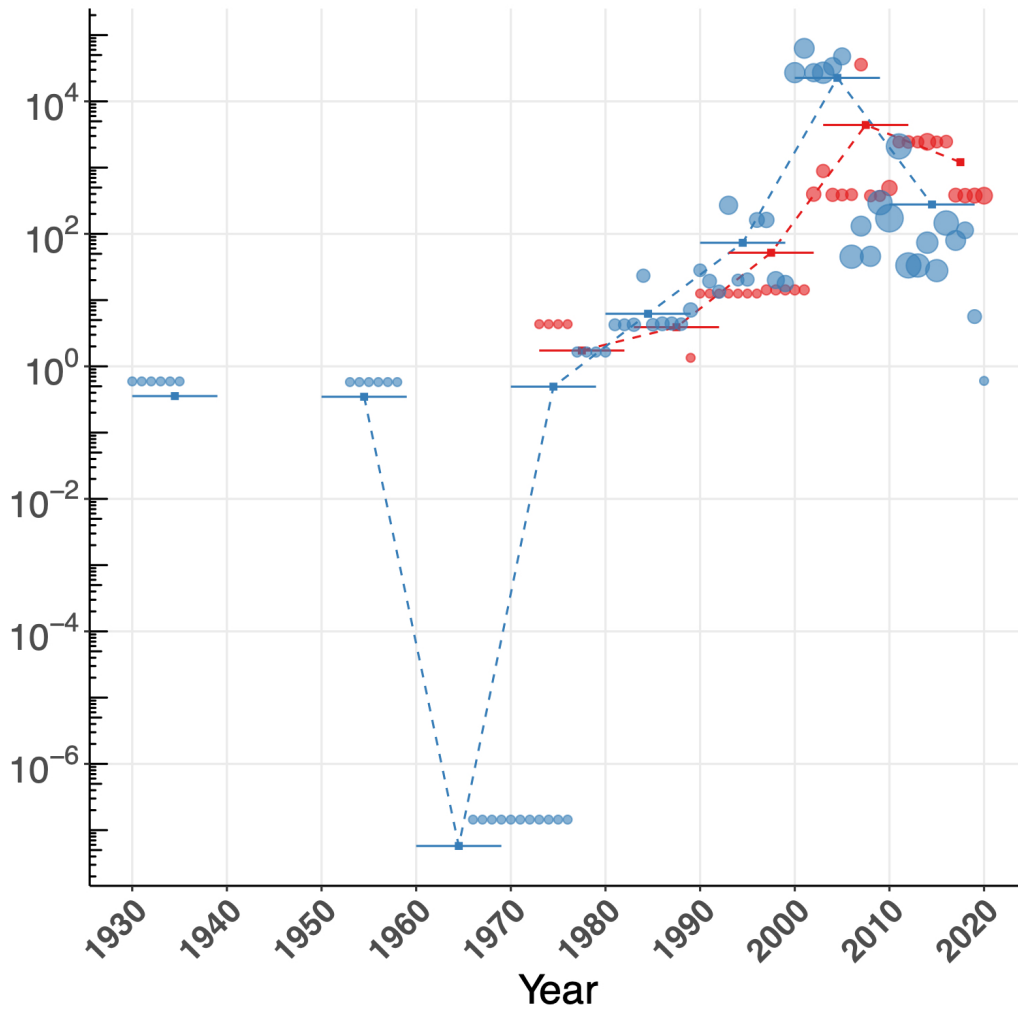

(b)

Annual costs in US\$ millions

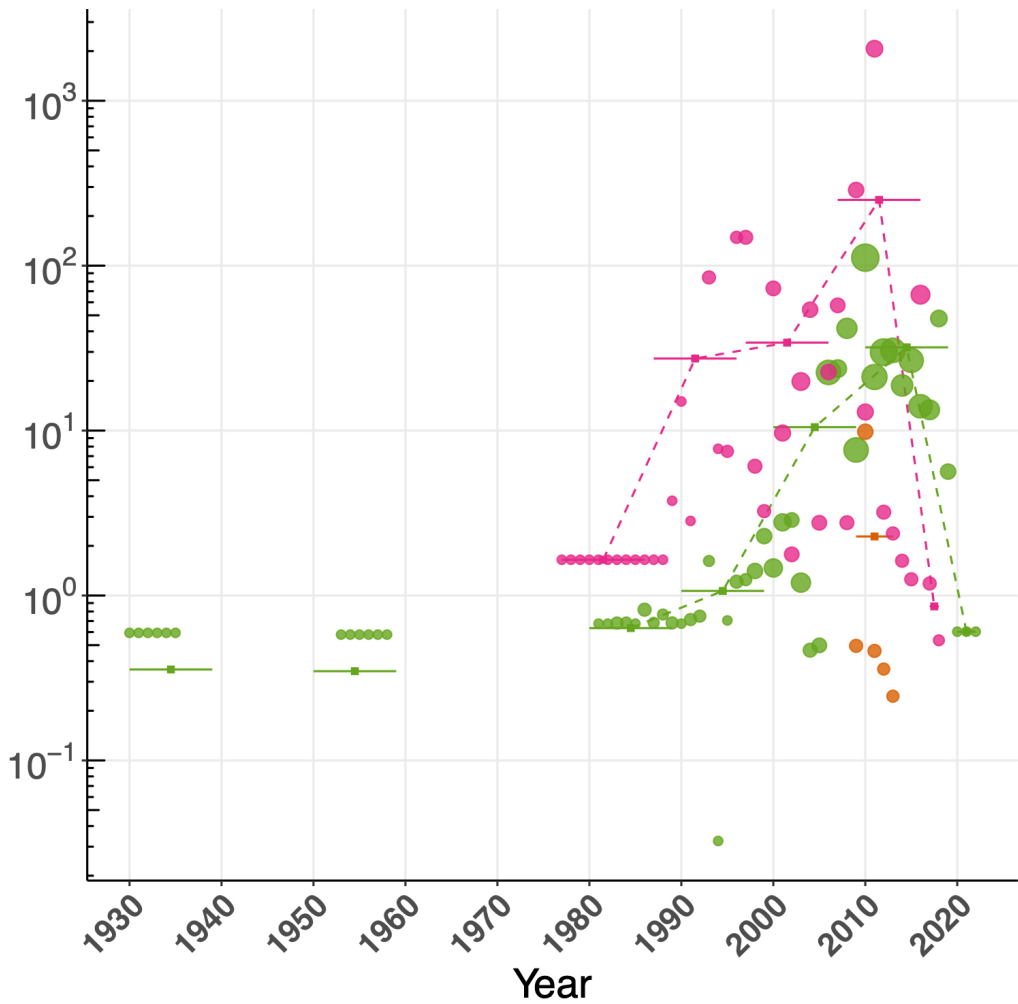

Supplement: Diagne_et_al_Appendix3.pdf [file Diagne_et_al_Appendix3.pdf]
