# Supplementary material for: Economic costs of invasive rodents worldwide: the tip of the iceberg
Source: PubMed Central journal article supplement (PMC10042159; doi:10.7717/peerj.14935), 2023-03-24

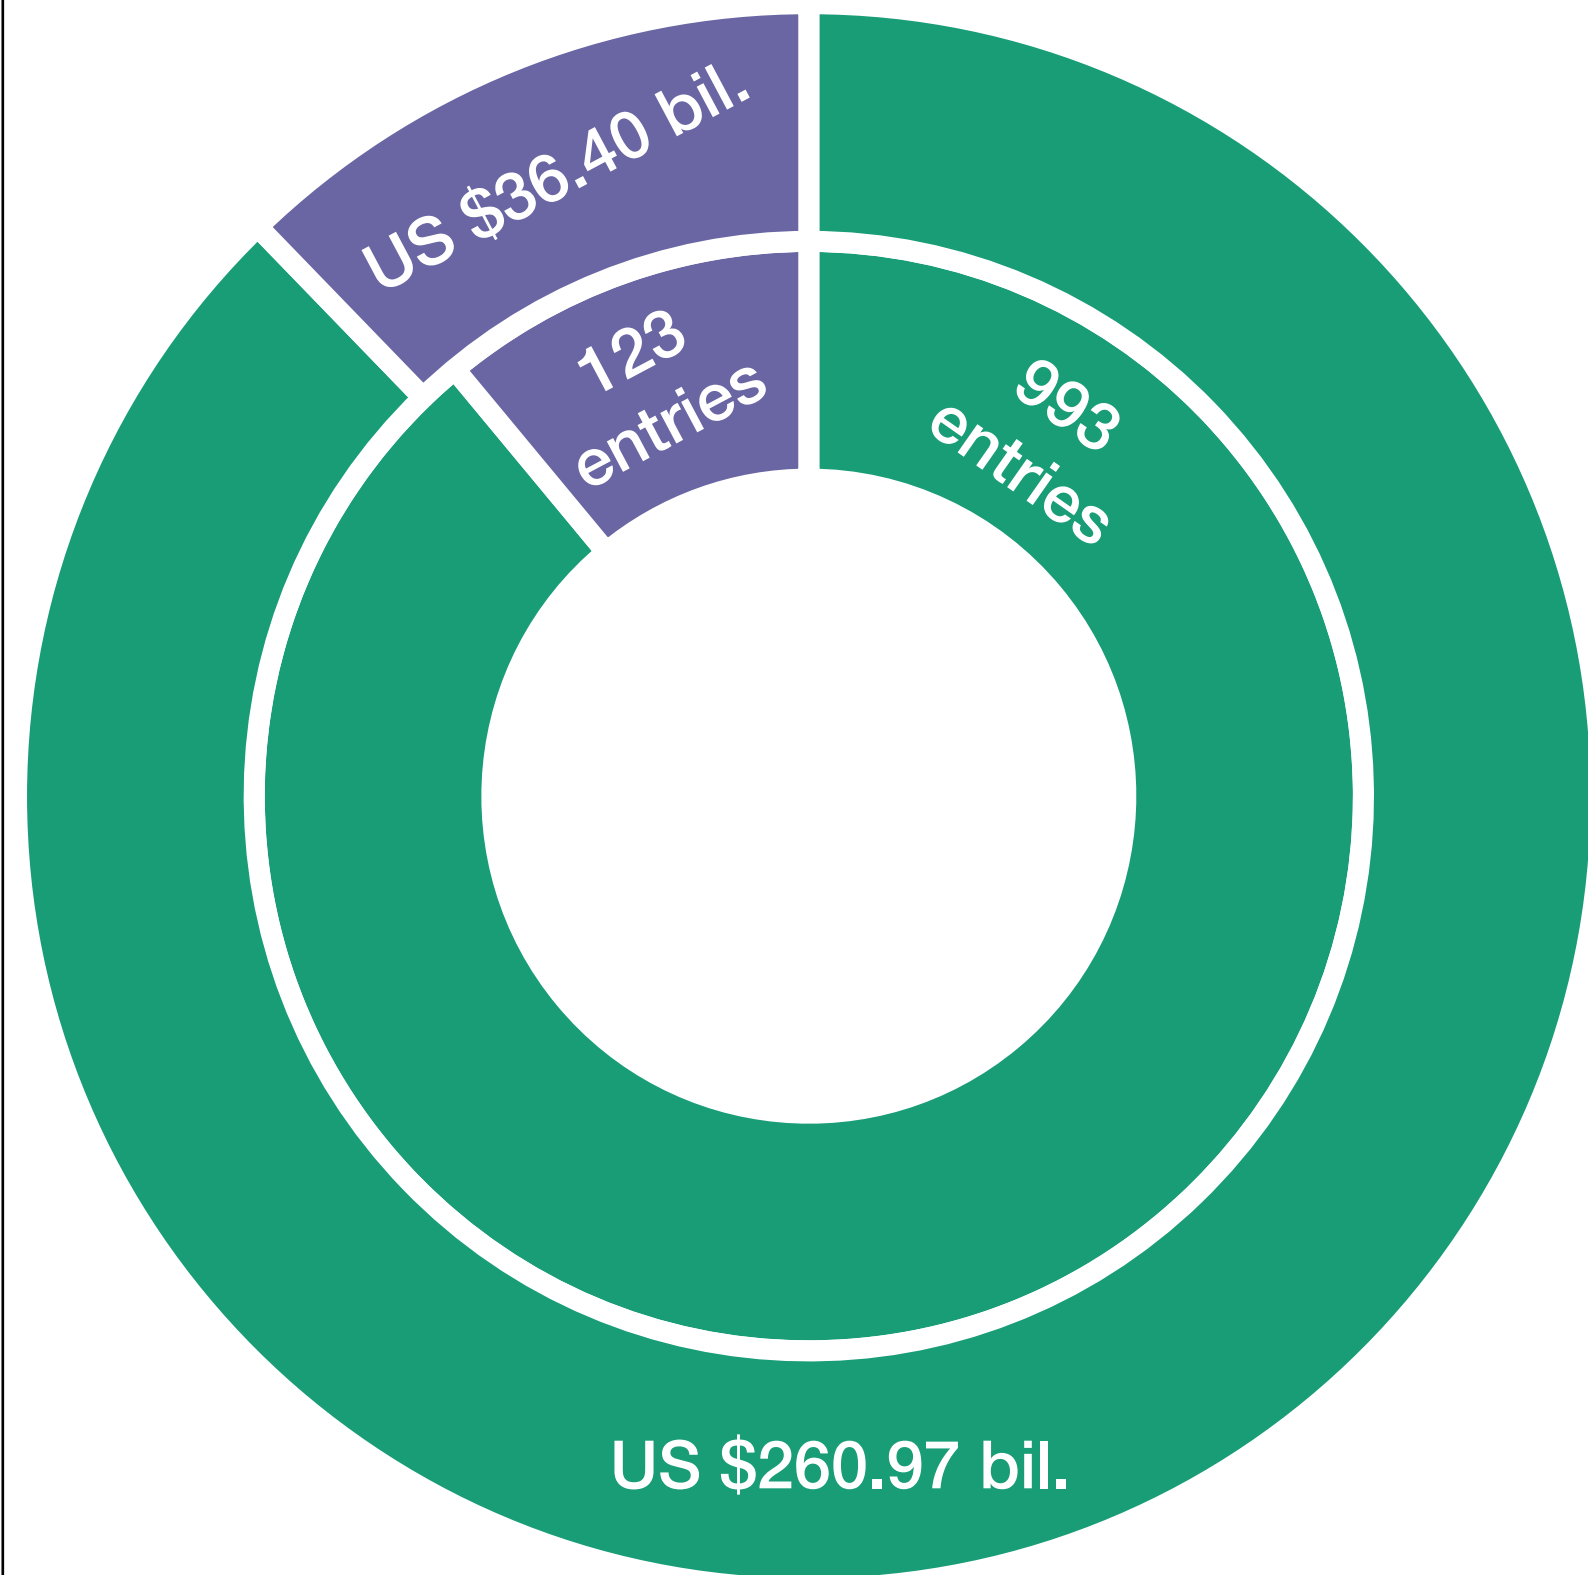

■ High

■ Low

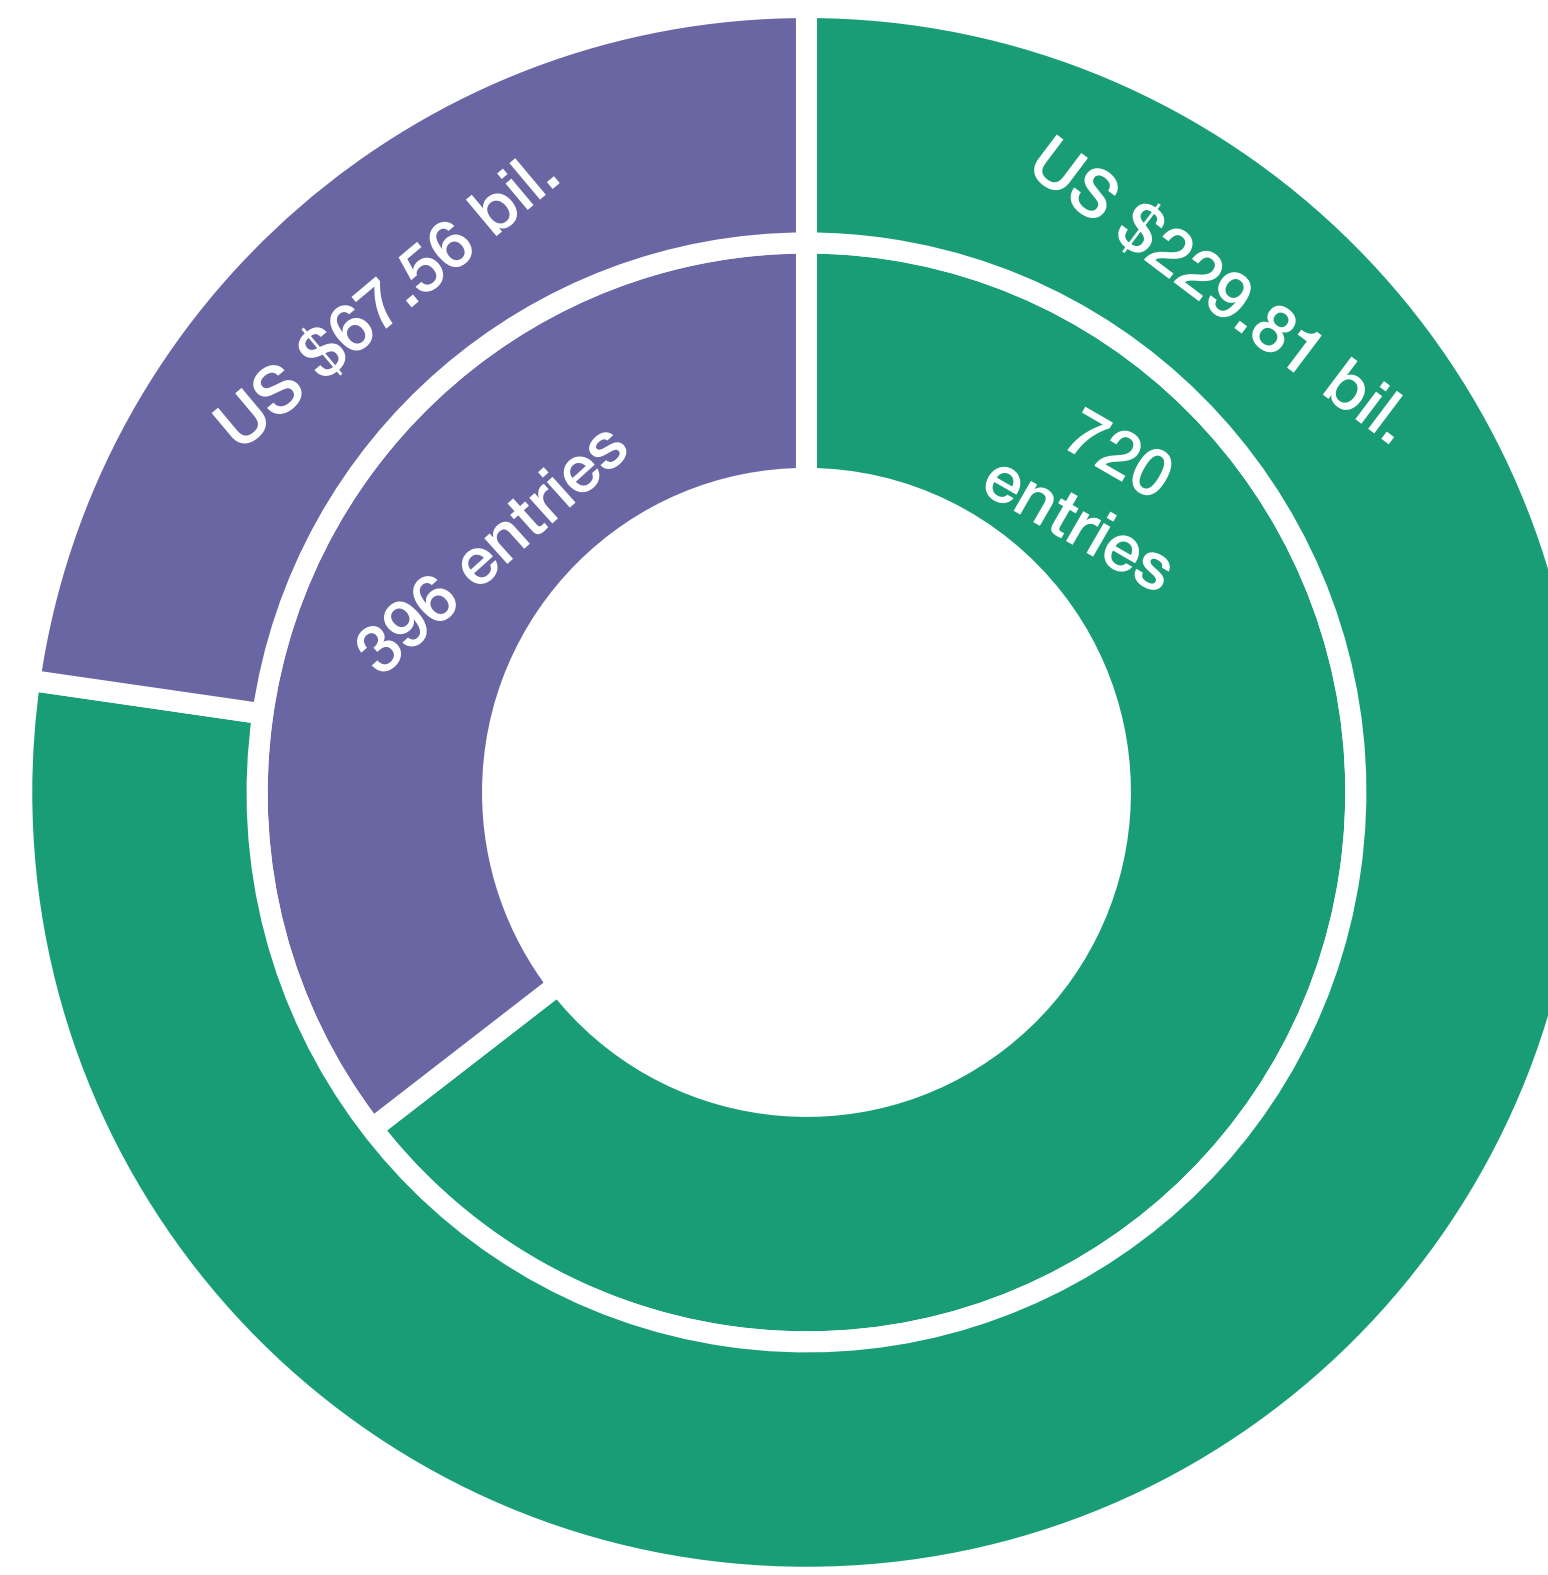

■ Observed

■ Potential

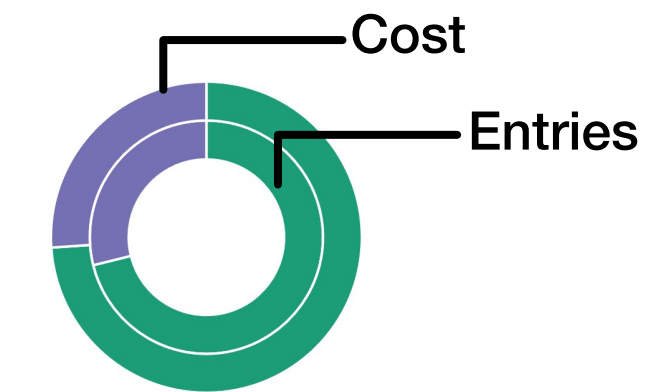

Supplement: peerj-11-14935-s002.pdf [file peerj-11-14935-s002.pdf]
