# Supplementary material for: Economic costs of invasive rodents worldwide: the tip of the iceberg
Source: PubMed Central journal article supplement (PMC10042159; doi:10.7717/peerj.14935), 2023-03-24
Supplement: peerj-11-14935-s004.pdf [file peerj-11-14935-s004.pdf]

Average annual cost of invasions in US\$ millions

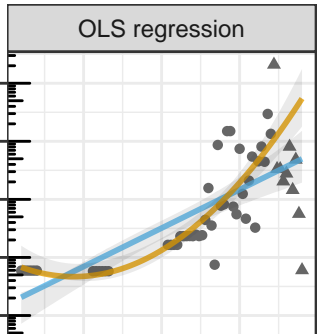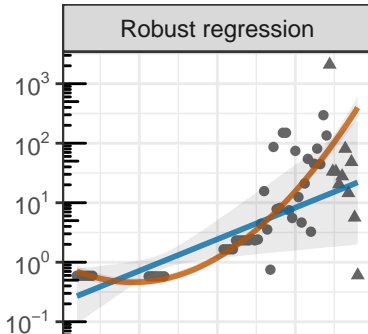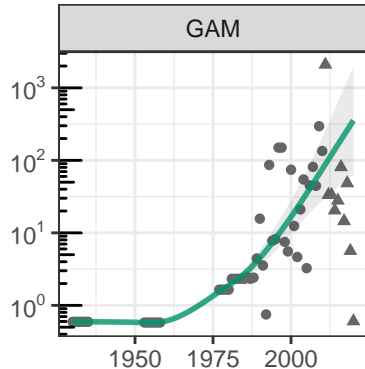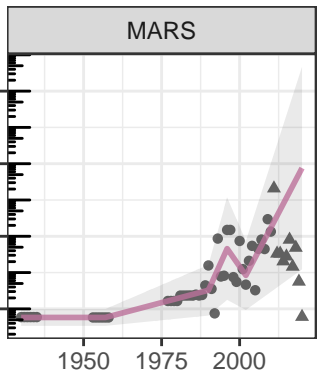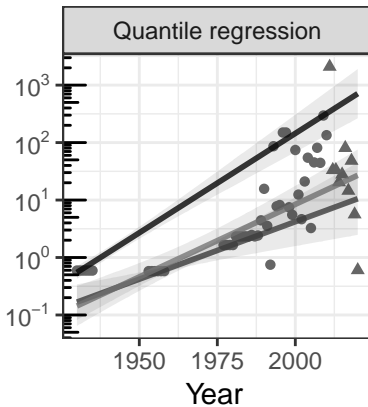

## Model

- OLS linear regression
- OLS quadratic regression
- Robust linear regression
- Robust quadratic regression
- MARS
- GAM
- Quantile 0.5 regression
- Quantile 0.1 regression
- Quantile 0.9 regression

## Calibration

- Included
- ▲ Excluded

Year
