# Supplementary material for: Economic costs of invasive rodents worldwide: the tip of the iceberg
Source: PeerJ. 2023 Mar 24;11:e14935. doi: 10.7717/peerj.14935 (PMC10042159; doi:10.7717/peerj.14935)
Supplement: Supplemental Information 1 — ’Descriptors’ provides full definition and details about the descriptive columns from the InvaCost database (note that we also provide definition of the new columns specifically added for our study); ‘Rodentia dataset’ contains the original cost entries pertaining to the order Rodentia from the InvaCost database (version 4.1); ‘Changes_made’ synthesizes all modifications made to the original cost data associated with rodent taxa; ‘Rodentia subset’ contains original cost entries refined as well as new cost entries collected following our own data searches (note that the latter are identified with the tag New_cost in the “InvaCost_Id” column); ‘Suitable subset’ contains the portion of cost entries from the ‘Rodentia dataset’ after filtering out overlapping or duplicating costs, as well as costs without clear temporal information; ‘Expanded subset’ contains the annualized cost entries following data expansion through the invacost R package (Leroy et al., 2022); ‘Conservative subset’ is the most robust subset of the ‘Expanded subset’ obtained after keeping only the observed (“Implementation” column) and high (“Method reliability_final” column) cost entries. [file peerj-11-14935-s001.xlsx]

## Sheet: Descriptors
Summary_of_the_content_of_the_descriptive_columns_of_the_InvaCost_database
	Column names are in italic and presented in the same order as they appear in the database. The categories used for each descriptive variable are in bold.
Column_name	Definition	Database version of first appearance	Filling status
InvaCost_ID	Public unique identifier of the cost entry, which is used since the version 4.1 of the database; this is formulated as follows: 'IC_x_y' with 'IC' meaning InvaCost, 'x' being the version number of the database, and 'y' being the sequential number attributed following the order of integration of costs in the database	InvaCost_4.1	Complete
Cost_ID	Original identifier of the cost entry, as proposed by the contributors and then confirmed/modified by the database managers to ensure consistency within the whole database. This code is used to designate the cost entry for (i) internal tracing of the cost estimate by the database managers and (ii) identifying the cost entry when it is mentioned in the Overlap column	InvaCost_1.0	Complete
Repository	Literature engine (Web of Science (WoS), Google Scholar (GS), Google search engine (Go), Pubmed, Scielo) or original source (Targeted collection (TC)) from which the reference was collected (see Diagne et al. 2020 Scientific Data for further details); cells are left empty when no repository was specified or the reference was shared by external users that did not give any information about this	InvaCost_1.0	Incomplete (cells without information are left empty)
Reference_ID	Identifier for the reference where the cost entry is reported; note that this field is currently being improved internally to have a consistent terminology across references within the database	InvaCost_1.0	Complete
Reference_title	Title of the reference where the cost entry is reported. As much as possible, this is the original source where the cost was first provided	InvaCost_1.0	Complete
Authors	Authors of the reference where the cost entry is reported	InvaCost_1.0	Complete
Abstract	If existing/accessible, the abstract of the reference where the cost entry is reported	InvaCost_2.0	Incomplete (cells without information are left empty)
Publication_year	Year of publication of the reference where the cost entry is reported	InvaCost_1.0	Complete
Language	Main language used in the original reference reporting the cost entry; 22 languages are currently recorded in the database: Catalan, Chinese, Croatian, Czech, Danish, Dutch, English, Finnish, French, Galician, German, Greek, Hindi, Icelandic, Italian, Japanese, Norwegian, Portuguese, Russian, Spanish, Swedish, Ukrainian	InvaCost_2.0	Complete
Type_of_material	Type of reference analyzed (i.e. scientific peer-reviewed article or grey literature); for grey literature, the exact nature of the reference was indicated (e.g., official report, press release)	InvaCost_1.0	Complete
Previous_materials	If any, the list of successive materials checked before reaching the original reference providing the cost entry	InvaCost_1.0	Complete
Availability	The accessibility of the original reference as a searchable document (yes/no)	InvaCost_1.0	Complete
Kingdom	Taxonomic kingdom of the invasive species associated with the cost entry	InvaCost_1.0	Complete
Phylum	Taxonomic phylum of the invasive species associated with the cost entry	InvaCost_1.0	Complete
Class	Taxonomic class of the invasive species associated with the cost entry	InvaCost_1.0	Complete
Order	Taxonomic order of the invasive species associated with the cost entry	InvaCost_1.0	Complete
Family	Taxonomic family of the invasive species associated with the cost entry	InvaCost_1.0	Complete
Genus	Taxonomic genus of the invasive species associated with the cost entry	InvaCost_1.0	Complete
Species	Taxonomic species of the invasive species associated with the cost entry	InvaCost_1.0	Complete
Subspecies	Taxonomic sub-species of the invasive species associated with the cost entry	InvaCost_3.0	Incomplete (cells without information are left empty)
Common_name	Non-scientific (or vernacular) name(s) provided in the original reference, or by the International Union for Conservation of Nature (IUCN) when not provided	InvaCost_1.0	Incomplete (cells without information are left empty)
Environment	Type of environment (aquatic, terrestrial, semi-aquatic, diverse/unspecified) where the cost estimate occurred	InvaCost_1.0	Complete
Environment_IAS	Type of environment where the invasive species lives, independently of where the cost occurred: aquatic (species with a close association with aquatic systems at any life stage, including for reproduction, development and/or foraging), semi-aquatic (species with a looser association with aquatic systems) or terrestrial (otherwise); diverse/unspecified is used when there are multiple IAS pertainin…	InvaCost_3.0	Incomplete (cells without information are left empty)
HabitatVerbatim	Copy from the original reference of the sentence/paragraph indicating the habitat typology of the studied area	InvaCost_2.0	Incomplete (cells without information are left empty)
Habitat	The type of habitat where the cost occurred (1.Forests: closed vegetation dominated by deciduous or evergreen trees; 2.Open forests: woodland vegetation with canopy openings created by environmental stress or disturbance; 3.Scrub: shrublands maintained by environmental stress (aridity) or disturbance; 4.Grasslands: open graminoid-dominated habitats maintained either by climate (steppes, prairies,…	InvaCost_2.0	Incomplete (cells without information are left empty)
urbanArea	Assessment of the geographical area where the cost occurred as being strictly urban if the cost occurred in an urban area only; other if the cost occurred in a non-urban area or in a large area where urban and non-urban areas cannot be distinguished; both if the study compares the cost between urban and non-urban areas (i.e. urban vs. suburban, or suburban vs. non-urban; the comparison must be ex…	InvaCost_4.0	Incomplete (cells without information are left empty)
protectedArea	Assessment of the geographical area where the cost occurred as a protected area (Y) or not (N); NA is used if the area comprises both protected and unprotected areas, or if the protection status of the place is unknown	InvaCost_2.0	Incomplete (cells without information are left empty)
Island	Assessment of the geographical area where the cost occurred as an island (Y) or not (N); NA is used when the cost information is not clearly provided, unknown, or comprises both island and mainland together	InvaCost_2.0	Incomplete (cells without information are left empty)
Geographic_region	Geographical region(s) where the cost occurred (Africa, Antarctic-Subantarctic, Asia, Central America, Europe, North America, Oceania, Pacific islands, South America); Diverse/unspecified was used when the cost estimate occurred over several regions simultaneously	InvaCost_1.0	Complete
Official_country	Country where the cost occurred; sometimes, this is not congruent with the geographic region as some territories (e.g., overseas areas) are located in another continent than their official country of attachment; we used information from www.naturalearthdata.com/ as a reference for country's name	InvaCost_1.0	Complete
State|Province|Administrative_area	The second level of geographic division (state, province or territorial administrative area) for the official country where the cost occurred	InvaCost_2.0	Incomplete (cells without information are left empty)
Location	When provided, the precise location (e.g., city, area) where the cost estimate occurred. Otherwise, we put (i) NA when such information was not provided and the cost entry was provided at a unit or site Spatial scale, or (ii) diverse/unspecified when such information was not provided and the cost entry was provided at global, intercontinental, continental, regional or country Spatial scale	InvaCost_1.0	Complete
Spatial_scale	Order of magnitude of the extent, size of the land/water area where the costs incurred. Options include: global (worldwide-scale), intercontinental (areas from two or more geographic regions), continental ('Geographic region' level), regional (several countries within a single 'Geographic region'), country, site (area at intra-country level, including USA states) and unit (well-defined surface ar…	InvaCost_1.0	Complete
Period_of_estimation	If provided, the exact period of time covered by the cost, otherwise the raw formulation provided in the reference analyzed (e.g. late 90s, during 5 years)	InvaCost_1.0	Complete
Time_range	Two options: period if the cost is given for a period exceeding a year; or year if the cost is given yearly or for a period up to one year. Alternatively, we put Unspecified if no information is given or guessable from the source	InvaCost_1.0	Complete
Probable_starting_year	Year in which the cost is known or assumed to have started to occurred. When not explicitly provided by the authors, we mentioned unspecified; in the case of a cost estimate provided for a one-year period straddling two calendar years, we mentioned the latest year of the cost occurrence.	InvaCost_1.0	Complete
Probable_ending_year	Year in which the cost is known or assumed to have ended. When not explicitly provided by the authors, we mentioned unspecified; in the case of a cost estimate provided for a one-year period straddling two calendar years, we mentioned the latest year of the cost occurrence.	InvaCost_3.0	Complete
Probable_starting_year_adjusted	Probable starting year and Probable ending year columns where the cells with unspecified information are replaced, as much as possible, by a specific year from educated guesses based on the duration time provided in the original reference (see Period of estimation column). When relevant (e.g. the authors provide a cost that occurs "since/for a well-defined number of years"), we considered the Pub…	InvaCost_1.0	Incomplete (cells without information correspond to cost entries for which no starting year could be guessed)
Probable_ending_year_adjusted	Probable starting year and Probable ending year columns where the cells with unspecified information are replaced, as much as possible, by a specific year from educated guesses based on the duration time provided in the original reference (see Period of estimation column). When relevant (e.g. the authors provide a cost that occurs "since/for a well-defined number of years"), we considered the Pub…	InvaCost_1.0	Incomplete (cells without information correspond to cost entries for which no ending year could be guessed)
Occurrence	Status of the cost estimate as potentially ongoing (if the cost can be expected to continue over time) or one-time (if the cost was deemed as unlikely to continue)	InvaCost_1.0	Complete
Raw_cost_estimate_original_currency	Cost estimate directly retrieved from the analyzed reference	InvaCost_1.0	Complete
Min_Raw_cost_estimate_original_currency	Lower boundary of the Raw cost estimate original currency (if a range of estimates was provided by the authors)	InvaCost_1.0	Incomplete (cells without information are left empty)
Max_Raw_cost_estimate_original_currency	Higher boundary of the Raw cost estimate original currency (if a range of estimates was provided by the authors)	InvaCost_1.0	Incomplete (cells without information are left empty)
Raw_cost_estimate_2017_USD_exchange_rate	Raw cost estimate original currency standardised from original Currency and Applicable year to 2017 US$ based on the official market exchange rate (original currency unit per US$) provided by the World Bank Open Data (available at https://data.worldbank.org/indicator/PA.NUS.FCRF?end=2017&start=1960)	InvaCost_1.0	Complete
Raw_cost_estimate_2017_USD_PPP	Raw cost estimate original currency standardized to 2017 US$ based on the official Purchase Power Parity (PPP; original currency unit per US$) provided by the World Bank Open Data (available at https://data.worldbank.org/indicator/PA.NUS.PPP?end=2017&start=1990) and the Organisation for Economic Cooperation and Development (available at https://data.oecd.org/conversion/purchasing-powerparities-pp…	InvaCost_1.0	Complete
Cost_estimate_per_year_original_currency	Raw cost estimate original currency transformed to a cost estimate per year of the Period of estimation, which was obtained by dividing the raw cost estimate by the number of years between the Probable starting year_completed and Probable ending year_completed. Blank cells are those that have no information in at least one of these two previous columns	InvaCost_1.0	Complete
Cost_estimate_per_year_2017_USD_exchange_rate	Cost estimate per year original currency standardized from original Currency and Applicable year to 2017 USD based on the official market exchange rate (original currency unit per US$) provided by the World Bank Open Data (available at https://data.worldbank.org/indicator/PA.NUS.FCRF?end=2017&start=1960). Blank cells are those that have no information in at least one of these two previous columns	InvaCost_1.0	Complete
Cost_estimate_per_year_2017_USD_PPP	Cost estimate per year original currency standardized from original Currency and Applicable year to 2017 USD based on Purchase Power Parity (PPP; original currency unit per US$) provided by the World Bank Open Data (available at https://data.worldbank.org/indicator/PA.NUS.PPP?end=2017&start=1990) and the Organisation for Economic Cooperation and Development (available at https://data.oecd.org/con…	InvaCost_1.0	Complete
Currency	Currency of the Raw cost estimate original currency as extracted in the original reference and standardised (when possible) using internationally recognized ISO 4217 codes (https://www.iso.org/fr/iso-4217-currency-codes.html); 50 currencies are currently recorded in InvaCost: ARS (Argentine peso), AUD (Australian Dollars), CAD (Canadian Dollars), CHF (Swiss Fanc), CLP (Chilean Peso), COL (Colombi…	InvaCost_1.0	Complete
Applicable_year	Year of the Currency value (not the year of the cost occurrence) considered for the conversion/standardization of the cost estimate	InvaCost_1.0	Complete
Type_of_applicable_year	Assessment of the applicable year as effective if explicitly stated by the authors or publication year if no explicit information was provided in the reference analyzed	InvaCost_1.0	Complete
Implementation	This states — at the time of the estimation — whether the reported cost was actually observed (i.e., cost actually incurred) or potential (i.e., not incurred but expected cost)	InvaCost_1.0	Complete
Acquisition_method	Method used to obtain the cost estimate: report/estimation directly obtained or derived (using inference methods) from field-based information or extrapolation (cost predicted beyond the original spatial and/or temporal observation range from computational modelling)	InvaCost_1.0	Complete
Impacted_sector	Sector impacted by the cost estimate in our socio-ecosystems: Agriculture (considered at its broadest sense, food and other useful products produced by human activities through using natural and/plant resources from their ecosystems such as crop growing, livestock breeding, beekeeping, land management); Authorities-Stakeholders (governmental services and/or official organisations such as conserva…	InvaCost_1.0	Complete
Type_of_cost	A variety of terms/categories pertianing to damage and losses incurred by an invasion (e.g. damage-loss, damage repair, medical care, crop losses) or means dedicated to understand or predict (e.g., research), prevent (e.g., education, biosecurity), detect (e.g., monitoring, surveillance) and/or manage (e.g., control, eradication) the invasions; Unspecified is mentionned if no information is given…	InvaCost_1.0	Complete
Type_of_cost_merged	Categories of the Type of cost column reassigned into damage (economic losses due to direct and/or indirect impacts of invaders, such as yield loss, health injury, land alteration, infrastructure damage, or income reduction), management (monetary resources allocated to mitigate the spread or impacts of invaders, such as prevention, control, research, long-term management, eradication) or mixed (w…	InvaCost_3.0	Complete
Management_type	Pre-invasion_management (monetary investments for preventing successful invasions in an area - including quarantine or border inspection, risk analyses, biosecurity management, etc.), post-invasion_management (money spent for managing invasions in invaded areas - including control, eradication, containment), knowledge funding (money allocated to all actions and operations that could be of interes…	InvaCost_3.0	Complete
Method_reliability	Assessment of the methodological approach used for cost estimation as of (i) high reliability if either provided by officially pre-assessed materials (peer-reviewed articles and official reports) or the estimation method was documented, repeatable and/or traceable if provided by other grey literature, or (ii) low reliability if not	InvaCost_1.0	Complete
Method_reliability_refined	Assessment of the methodological approach used for cost estimation as of high or low reliability based on the evaluation of the estimation methodology by expert contributors	InvaCost_3.0	Incomplete (cells without information are left empty)
Method_reliability_Explanation	Detailed explanation why a particular methodological approach used for cost estimation was deemed as of high or low reliability based on expert opinion	InvaCost_3.0	Incomplete (cells without information are left empty)
Method_reliability_Expert_Name	Complete name and contact details of the expert had deemed the reliability of the cost entry	InvaCost_3.0	Incomplete (cells without information are left empty)
Overlap	List of cost entries (using Cost_ID) that might overlap with other cost entry(s) -- this is noted as follows: Z(V/W) when the overlap is known and one or more cost ID (V,W) are included in another cost ID (Z); Z/V/W: when the overlap is not clear; and Z(V); Z/W if there are more than one unrelated overlaps	InvaCost_3.0	Incomplete (cells without information are left empty)
Benefit_value(s)	Mention (if any) of the benefit value in the analyzed material (yes/no); 'benefit' refers here to a monetary estimate associated with profitable activities based on IAS. This definition therefore excludes any economic gain based on avoided or mitigated effects of the IAS (for instance, due to efficient management actions over time that may result in apparent benefits from avoidance of damages) - …	InvaCost_1.0	Complete
Details	When necessary, narrative elements deemed important either to understand the cost estimate or to support choices made for completing the database; this column was left unchanged from the original entries in order to allow trace-back investigations	InvaCost_1.0	Incomplete (cells without information are left empty)
Initial contributors_names	Name of contributor(s) having collated the cost entry	InvaCost_1.0	Incomplete (cells without information are left empty)
Double-checking	Assessment of cost information collated (by at least) two contributors; yes if it has been double checked, no if it has not. The names/contacts of each contributor are provided in the Initial contributors_names column	InvaCost_3.0	Incomplete (cells without information are left empty)
Island2	Revised Island column where (i) missing information were completed and (ii) previous information were reviewed to modify non-insular areas from United Kindom, Australia, New Zealand and Japan as mainland territories	[column added in our study]
Method_reliability_final	Re-assessment of the Method_reliability and Method_reliability_refined columns (yes/no) by the authors based on authors' expertise	[column added in our study]
ExcludeFromAnalysis	Decision to exclude (yes/no) the cost data from our analyses following the assessment of potential overlaps and/or duplicates with other cost data	[column added in our study]
Reasons	Statement of the detected overlaps or duplicates between recorded cost IDs	[column added in our study]
Observations	Rationale underlying the modification, inclusion or exclusion of cost data following the assessment of method reliability, potential overlaps and/or duplicates with other cost data	[column added in our study]

## Sheet: Rodentia dataset
InvaCost_ID	Cost_ID	Repository	Reference_ID	Reference_title	Authors	Abstract	Publication_year	Language	Type_of_material	Previous_materials	Availability	Kingdom	Phylum	Class	Order	Family	Genus	Species	Subspecies	Common_name	Environment	Environment_IAS	HabitatVerbatim	Habitat	urbanArea	protectedArea	Island	Geographic_region	Official_country	State|Province|Administrative_area	Location	Spatial_scale	Period_of_estimation	Time_range	Probable_starting_year	Probable_ending_year	Probable_starting_year_adjusted	Probable_ending_year_adjusted	Occurrence	Raw_cost_estimate_original_currency	Min_Raw_cost_estimate_original_currency	Max_Raw_cost_estimate_original_currency	Raw_cost_estimate_2017_USD_exchange_rate	Raw_cost_estimate_2017_USD_PPP	Cost_estimate_per_year_original_currency	Cost_estimate_per_year_2017_USD_exchange_rate	Cost_estimate_per_year_2017_USD_PPP	Currency	Applicable_year
IC_1.0_25	25	TC	2	Counting the Cost: Impact of Invasive Animals in Australia	McLeod		2004	English	Official report	Rolfe, J., & Windle, J. (2014). Public preferences for controlling an invasive species in public and private spaces. Land Use Policy, 41, 1–10. https://doi.org/10.1016/j.landusepol.2014.04.013	Yes	Animalia	Chordata	Mammalia	Rodentia	Muridae	Mus	Mus musculus		House mouse	Terrestrial	Terrestrial			other		Y	Oceania	Australia		Diverse/Unspecified	Country	2004	Year	2004	Unspecified	2004	2004	Potentially ongoing	23110000			2.20559e+07	2.19721e+07	23110000	2.20559e+07	2.19721e+07	AUD	2004
IC_1.0_26	26	TC	360	Impact of the 1993 mouse plague	Caughley et al		1994	English	Book	McLeod, R. (2004). Counting the Cost: Impact of Invasive Animals in Australia, 2004. Canberra. Retrieved from https://www.pestsmart.org.au/wp-content/uploads/2010/03/CountingTheCost.pdf	No	Animalia	Chordata	Mammalia	Rodentia	Muridae	Mus	Mus musculus		House mouse	Terrestrial	Terrestrial			other		Y	Oceania	Australia		Diverse/Unspecified	Country	1993	Year	1993	Unspecified	1993	1993	Potentially ongoing	27000000			3.26447e+07	3.43535e+07	27000000	3.26447e+07	3.43535e+07	AUD	1994
IC_1.0_27	27	TC	441	Non-indigenous vertebrates in Australia	Bomford and Hart		2002	English	Book chapter	McLeod, R. (2004). Counting the Cost: Impact of Invasive Animals in Australia, 2004. Canberra. Retrieved from https://www.pestsmart.org.au/wp-content/uploads/2010/03/CountingTheCost.pdf	Yes	Animalia	Chordata	Mammalia	Rodentia	Muridae	Mus	Mus musculus		House mouse	Terrestrial	Terrestrial			other		Y	Oceania	Australia		Diverse/Unspecified	Country	2000	Year	2000	Unspecified	2000	2000	Potentially ongoing	500000			412638	542848	500000	412638	542848	AUD	2000
IC_1.0_28	28	TC	441	Non-indigenous vertebrates in Australia	Bomford and Hart		2002	English	Book chapter	McLeod, R. (2004). Counting the Cost: Impact of Invasive Animals in Australia, 2004. Canberra. Retrieved from https://www.pestsmart.org.au/wp-content/uploads/2010/03/CountingTheCost.pdf	Yes	Animalia	Chordata	Mammalia	Rodentia	Muridae	Mus	Mus musculus		House mouse	Terrestrial	Terrestrial			other		Y	Oceania	Australia		Diverse/Unspecified	Country	2000	Year	2000	Unspecified	2000	2000	Potentially ongoing	10000000			8.25276e+06	1.0857e+07	10000000	8.25276e+06	1.0857e+07	AUD	2000
IC_1.0_29	29	TC	441	Non-indigenous vertebrates in Australia	Bomford and Hart		2002	English	Book chapter	McLeod, R. (2004). Counting the Cost: Impact of Invasive Animals in Australia, 2004. Canberra. Retrieved from https://www.pestsmart.org.au/wp-content/uploads/2010/03/CountingTheCost.pdf	Yes	Animalia	Chordata	Mammalia	Rodentia	Muridae	Mus	Mus musculus		House mouse	Terrestrial	Terrestrial			other		Y	Oceania	Australia		Diverse/Unspecified	Country	2000	Year	2000	Unspecified	2000	2000	Potentially ongoing	2500000			2.06319e+06	2.71424e+06	2500000	2.06319e+06	2.71424e+06	AUD	2000
IC_1.0_38	38	TC	412	Managing Vertebrate Pests: Rodents. Canberra: Bureau of Resource Sciences	﻿Caughley et al		1998	English	Book chapter	McLeod, R. (2004). Counting the Cost: Impact of Invasive Animals in Australia, 2004. Canberra. Retrieved from https://www.pestsmart.org.au/wp-content/uploads/2010/03/CountingTheCost.pdf	Yes	Animalia	Chordata	Mammalia	Rodentia	Muridae	Rattus	Rattus rattus		Black rat	Terrestrial	Terrestrial			other		Y	Oceania	Australia		Diverse/Unspecified	Country	1998	Year	1998	Unspecified	1998	1998	Potentially ongoing	3000000			2.83396e+06	3.46995e+06	3000000	2.83396e+06	3.46995e+06	AUD	1998
IC_1.0_39	39	WoS	12049	Population control of coypu Myocastor coypus in Italy compared to eradication in UK: a cost-benefit analysis	Panzacchi et al		2007	English	Peer-reviewed article	NA	Yes	Animalia	Chordata	Mammalia	Rodentia	Myocastoridae	Myocastor	Myocastor coypus		Nutria	Semi-aquatic	Semi-aquatic			other			Europe	Italy		Diverse/Unspecified	Country	1995-2000	Period	1995	2000	1995	2000	One-time	935138			1.51509e+06	1.36456e+06	155856	252515	227427	EUR	2007
IC_1.0_40	40	WoS	12049	Population control of coypu Myocastor coypus in Italy compared to eradication in UK: a cost-benefit analysis	Panzacchi et al		2007	English	Peer-reviewed article	NA	Yes	Animalia	Chordata	Mammalia	Rodentia	Myocastoridae	Myocastor	Myocastor coypus		Nutria	Semi-aquatic	Semi-aquatic			other			Europe	Italy		Diverse/Unspecified	Country	1995-2000	Period	1995	2000	1995	2000	One-time	2614408			3.9879e+06	3.07683e+06	435735	664649	512805	EUR	2007
IC_1.0_41	41	WoS	12049	Population control of coypu Myocastor coypus in Italy compared to eradication in UK: a cost-benefit analysis	Panzacchi et al		2007	English	Peer-reviewed article	NA	Yes	Animalia	Chordata	Mammalia	Rodentia	Myocastoridae	Myocastor	Myocastor coypus		Nutria	Semi-aquatic	Semi-aquatic			other			Europe	Italy		Diverse/Unspecified	Country	2007	Year	2006	Unspecified	2006	2006	Potentially ongoing	1.0944e+07	9434465	12453494	1.66934e+07	1.28797e+07	1.0944e+07	1.66934e+07	1.28797e+07	EUR	2007
IC_1.0_42	42	WoS	12049	Population control of coypu Myocastor coypus in Italy compared to eradication in UK: a cost-benefit analysis	Panzacchi et al		2007	English	Peer-reviewed article	NA	Yes	Animalia	Chordata	Mammalia	Rodentia	Myocastoridae	Myocastor	Myocastor coypus		Nutria	Semi-aquatic	Semi-aquatic			other		Y	Europe	United Kingdom		East Anglia	Site	1981-1992	Period	1981	1992	1981	1992	One-time	5000000			8.10088e+06	8.32622e+06	416667	675073	693852	EUR	2007
IC_1.0_93	93	WoS	13141	Effectiveness of coypu control in small Italian wetland areas	Bertolino et al		2005	English	Peer-reviewed article	NA	Yes	Animalia	Chordata	Mammalia	Rodentia	Myocastoridae	Myocastor	Myocastor coypus		Nutria	Semi-aquatic	Semi-aquatic			other	Y		Europe	Italy		Natural Reserve of Valenza	Unit (Reserve)	1998-2000	Year	1998	2000	1998	2000	One-time	1518			2370.38	2228.07	1518	2370.38	2228.07	EUR	2005
IC_1.0_97	97	TC	401	Mammifères aquatiques et semi-aquatiques introduits en France. Risques et conséquences	Moutou		1997	French	Journal article	NA	Yes	Animalia	Chordata	Mammalia	Rodentia	Myocastoridae	Myocastor	Myocastor coypus		Nutria	Semi-aquatic	Semi-aquatic			other			Europe	France	Vendée	Vendée	Site	Unspecified	Year	Unspecified	Unspecified	1997	1997	Potentially ongoing	15000			4467.81	138343	15000	4467.81	138343	FRF	1994
IC_1.0_98	98	TC	394	Le ragondin	Micol		1990	French	Journal article	Moutou, F. (1997). Mammifères aquatiques et semi-aquatiques introduits en France. Risques et conséquences. Bulletin Français de La Pêche et de La Pisciculture, (344–345), 133–139. https://doi.org/10.1051/kmae:1997016	No	Animalia	Chordata	Mammalia	Rodentia	Myocastoridae	Myocastor	Myocastor coypus		Nutria	Semi-aquatic	Semi-aquatic			other			Europe	France	Maine-et-Loire	Maine-et-Loire	Site	1990	Year	1990	Unspecified	1990	1990	Potentially ongoing	700000			241168	6.97648e+06	700000	241168	6.97648e+06	FRF	1990
IC_1.0_100	100	WoS	13836	From small Maria to massive Campbell: forty years of rat eradications from New Zealand islands	Towns and Broome		2003	English	Peer-reviewed article	NA	Yes	Animalia	Chordata	Mammalia	Rodentia	Muridae	Rattus	Rattus norvegicus		Brown rat	Terrestrial	Terrestrial			other	Y	Y	Oceania	New Zealand		Korapuki Island	Unit (Ha)	1986	Year	1986	1986	1986	1986	One-time	198			231.445	332.252	198	231.445	332.252	NZD	1986
IC_1.0_101	101	WoS	13836	From small Maria to massive Campbell: forty years of rat eradications from New Zealand islands	Towns and Broome		2003	English	Peer-reviewed article	NA	Yes	Animalia	Chordata	Mammalia	Rodentia	Muridae	Rattus	Rattus norvegicus		Brown rat	Terrestrial	Terrestrial			other	Y	Y	Oceania	New Zealand		Mercury Island	Unit (Ha)	2003	Year	2003	2003	2003	2003	One-time	366			283.192	325.704	366	283.192	325.704	NZD	2003
IC_1.0_102	102	WoS	13836	From small Maria to massive Campbell: forty years of rat eradications from New Zealand islands	Towns and Broome		2003	English	Peer-reviewed article	NA	Yes	Animalia	Chordata	Mammalia	Rodentia	Muridae	Rattus	Rattus norvegicus		Brown rat	Terrestrial	Terrestrial			other	Y	Y	Oceania	New Zealand		Tuhua	Unit (Ha)	2003	Year	2003	2003	2003	2003	One-time	114			88.2074	101.449	114	88.2074	101.449	NZD	2003
IC_1.0_103	103	TC	489	Rats eradicated from rugged Breaksea Island (170 ha), Fiordland, New Zealand	Taylor & Thomas		1993	English	Peer-reviewed article	Towns, D. R., & Broome, K. G. (2003). From small Maria to massive Campbell: forty years of rat eradications from New Zealand islands. New Zealand Journal of Zoology, 30, 377–398. Retrieved from http://www.tandfonline.com/doi/pdf/10.1080/03014223.2003.9518348?needAccess=true	Yes	Animalia	Chordata	Mammalia	Rodentia	Muridae	Rattus	Rattus norvegicus		Brown rat	Terrestrial	Terrestrial	forest of silver beech Nothofagusmenziesii and scrub	1	other	Y	Y	Oceania	New Zealand		Breaksea Island	Site	21 days (1988)	Year	1988	1988	1988	1988	One-time	82117			91906.7	100178	82117	91906.7	100178	NZD	1990
IC_1.0_104	104	TC	292	Eradication campaigns against kiore (Rattus exulans) on Rurima Rocks and Korapuki Island, Northern New Zealand	McFadden and Towns		1991	English	Peer-reviewed article	Towns, D. R., & Broome, K. G. (2003). From small Maria to massive Campbell: forty years of rat eradications from New Zealand islands. New Zealand Journal of Zoology, 30, 377–398. Retrieved from http://www.tandfonline.com/doi/pdf/10.1080/03014223.2003.9518348UnknownneedAccess=true	Yes	Animalia	Chordata	Mammalia	Rodentia	Muridae	Rattus	Rattus exulans		Polynesian rat	Terrestrial	Terrestrial			other	Y	Y	Oceania	New Zealand		Korapuki Island	Unit (Ha)	1986	Year	1986	Unspecified	1986	1986	Potentially ongoing	3560			3696.15	4293.07	3560	3696.15	4293.07	NZD	1991
IC_1.0_105	105	TC	292	Eradication campaigns against kiore (Rattus exulans) on Rurima Rocks and Korapuki Island, Northern New Zealand	McFadden and Towns		1991	English	Peer-reviewed article	Towns, D. R., & Broome, K. G. (2003). From small Maria to massive Campbell: forty years of rat eradications from New Zealand islands. New Zealand Journal of Zoology, 30, 377–398. Retrieved from http://www.tandfonline.com/doi/pdf/10.1080/03014223.2003.9518348UnknownneedAccess=true	Yes	Animalia	Chordata	Mammalia	Rodentia	Muridae	Rattus	Rattus exulans		Polynesian rat	Terrestrial	Terrestrial			other	Y	Y	Oceania	New Zealand		Rurima Island	Site	Unspecified	Year	Unspecified	Unspecified	1991	1991	One-time	8485			8809.51	10232.2	8485	8809.51	10232.2	NZD	1991
IC_1.0_106	106	WoS	13836	From small Maria to massive Campbell: forty years of rat eradications from New Zealand islands	Towns and Broome		2003	English	Peer-reviewed article	NA	Yes	Animalia	Chordata	Mammalia	Rodentia	Muridae	Rattus	Rattus exulans/Rattus norvegicus		Polynesian rat/Brown rat	Terrestrial	Terrestrial			other	Y	Y	Oceania	New Zealand		Kapiti Island	Site	25 days	Year	Unspecified	Unspecified	2003	2003	One-time	500000			386875	444951	500000	386875	444951	NZD	2003
IC_1.0_107	107	WoS	13836	From small Maria to massive Campbell: forty years of rat eradications from New Zealand islands	Towns and Broome		2003	English	Peer-reviewed article	NA	Yes	Animalia	Chordata	Mammalia	Rodentia	Muridae	Rattus	Rattus exulans/Rattus norvegicus		Polynesian rat/Brown rat	Terrestrial	Terrestrial	Forest	1	other	Y	Y	Oceania	New Zealand		Tuhua	Site	10 days	Year	Unspecified	Unspecified	2003	2003	One-time	146000			112967	129926	146000	112967	129926	NZD	2003
IC_1.0_108	108	TC	293	Eradication campaigns against Rattus norvegicus on the Noises Islands, New Zealand, using brodifacoum and 1080	Moors		1985	English	Official report	Towns, D. R., & Broome, K. G. (2003). From small Maria to massive Campbell: forty years of rat eradications from New Zealand islands. New Zealand Journal of Zoology, 30, 377–398. Retrieved from http://www.tandfonline.com/doi/pdf/10.1080/03014223.2003.9518348UnknownneedAccess=true	No	Animalia	Chordata	Mammalia	Rodentia	Muridae	Rattus	Rattus norvegicus		Brown rat	Terrestrial	Terrestrial			other		Y	Oceania	New Zealand		Noises Islands	Unit (Ha)	1985	Year	1985	1985	1985	1985	One-time	760			855.93	1468.68	760	855.93	1468.68	NZD	1985
IC_1.0_109	109	TC	303	Eradication of Norway rats (Rattus norvegicus) from Hawea Island, Fiordland, using brodifacoum	Taylor and Thomas		1989	English	Peer-reviewed article	Towns, D. R., & Broome, K. G. (2003). From small Maria to massive Campbell: forty years of rat eradications from New Zealand islands. New Zealand Journal of Zoology, 30, 377–398. Retrieved from http://www.tandfonline.com/doi/pdf/10.1080/03014223.2003.9518348?needAccess=true McFadden, I., & Towns, D. (1991). Eradication campaigns against Kiore (Rattus exulans) on Rurima Rocks and Korapuki, Norther…	Yes	Animalia	Chordata	Mammalia	Rodentia	Muridae	Rattus	Rattus norvegicus		Brown rat	Terrestrial	Terrestrial	Forest	1	other	Y	Y	Oceania	New Zealand		Hawea Island	Site	1986	Year	1986	1986	1986	1986	One-time	65000			113969	163609	32500	37989.7	54536.4	NZD	1986
IC_1.0_110	110	WoS	462	Control of invasive rats on islands and priorities for future action	Duron et al		2017	English	Peer-reviewed article	NA	Yes	Animalia	Chordata	Mammalia	Rodentia	Muridae	Rattus	Rattus exulans/Rattus norvegicus/Rattus rattus		Polynesian rat/Black rat/Brown rat	Terrestrial	Terrestrial			other		Y	Diverse/Unspecified	Diverse/Unspecified		Islands	Site	2017	Year	2017	Unspecified	2017	2017	Potentially ongoing	17262			17262		17262	17262		USD	2017
IC_1.0_132	132	WoS	1396	Eradicating mammals on New Zealand island reserves: What is left to do?	Parkes et al		2017	English	Peer-reviewed article	NA	Yes	Animalia	Chordata	Mammalia	Rodentia	Muridae	Diverse/Unspecified	Diverse/Unspecified		Rodents	Terrestrial	Terrestrial			other	Y	Y	Oceania	New Zealand		Campbell Island/Rangitoto-Motutapu Islands/Raoul/Little Barrier and Hen Islands	Unit (Ha)	2016	Year	2016	Unspecified	2016	2016	Potentially ongoing	300			229.928	285.862	300	229.928	285.862	AUD	2017
IC_1.0_153	154	WoS	9740	Protecting islands from pest invasion: optimal allocation of biosecurity resources between quarantine and surveillance	Moore et al		2010	English	Peer-reviewed article	NA	Yes	Animalia	Chordata	Mammalia	Rodentia	Muridae	Rattus	Rattus rattus		Black rat	Terrestrial	Terrestrial			other	Y	Y	Oceania	Australia		Barrow Island	Site	2008	Year	2008	2008	2008	2008	One-time	1.05037e+06	96667	2004072	1.00307e+06	808503	1.05037e+06	1.00307e+06	808503	AUD	2008
IC_1.0_154	155	WoS	9740	Protecting islands from pest invasion: optimal allocation of biosecurity resources between quarantine and surveillance	Moore et al		2010	English	Peer-reviewed article	NA	Yes	Animalia	Chordata	Mammalia	Rodentia	Muridae	Rattus	Rattus rattus		Black rat	Terrestrial	Terrestrial			other	Y	Y	Oceania	Australia		Barrow Island	Site	Unspecified	Year	Unspecified	Unspecified	2010	2010	One-time	375278			358378	288863	375278	358378	288863	AUD	2008
IC_1.0_167	170	WoS	2388	Prioritizing eradication actions on islands: it's not all or nothing	Helmstedt et al		2016	English	Peer-reviewed article	NA	Yes	Animalia	Chordata	Mammalia	Rodentia	Muridae	Rattus	Rattus sp.		Rat	Terrestrial	Terrestrial			other		Y	Oceania	Australia		Hermite	Unit (10.2 km2)	Unspecified	Year	Unspecified	Unspecified	2016	2016	One-time	143890			109243	98924.9	143890	109243	98924.9	AUD	2016
IC_1.0_170	173	TC	307	Eradications of vertebrate pests in Australia	Gregory et al		2014	English	Official report	Helmstedt, K. J., Shaw, J. D., Bode, M., Terauds, A., Springer, K., Robinson, S. A., & Possingham, H. P. (2016). Prioritizing eradication actions on islands: it’s not all or nothing. Journal of Applied Ecology, 53(3), 733–741. https://doi.org/10.1111/1365-2664.12599 2388	Yes	Animalia	Chordata	Mammalia	Rodentia	Muridae	Rattus	Rattus sp.		Rats	Terrestrial	Terrestrial			other	Y	Y	Oceania	Australia		Lord Howe Island	Site	Unspecified	Year	Unspecified	Unspecified	2014	2014	One-time	9000000			8.40005e+06	6.41569e+06	9000000	8.40005e+06	6.41569e+06	AUD	2014
IC_1.0_172	176	WoS	9566	Long-term cost-effectiveness of coypu (Myocastor coypus) control in Piedmont (Italy)	Bertolino and Viterbi		2010	English	Peer-reviewed article	NA	Yes	Animalia	Chordata	Mammalia	Rodentia	Myocastoridae	Myocastor	Myocastor coypus		Nutria	Semi-aquatic	Semi-aquatic			other			Europe	Italy		Piedmont	Site	1997-2005	Period	1997	2005	1997	2005	One-time	336308			500697	369537	37367.6	55633	41059.7	EUR	2010
IC_1.0_173	177	WoS	9566	Long-term cost-effectiveness of coypu (Myocastor coypus) control in Piedmont (Italy)	Bertolino and Viterbi		2010	English	Peer-reviewed article	NA	Yes	Animalia	Chordata	Mammalia	Rodentia	Myocastoridae	Myocastor	Myocastor coypus		Nutria	Semi-aquatic	Semi-aquatic			other			Europe	Italy		Piedmont	Site	1997-2005	Year	1997	2005	1997	2005	One-time	34956			52093.5	50821.4	34956	52093.5	50821.4	EUR	2010
IC_1.0_174	178	TC	228	Population control of coypu Myocastor coypus in Italy compared to eradication in UK: a cost-benefit analysis	Panzacchi et al		2007	English	Peer-reviewed article	Bertolino, S., & Viterbi, R. (2010). Long-term cost-effectiveness of coypu (Myocastor coypus) control in Piedmont (Italy). Biological Invasions, 12(8), 2549–2558. https://doi.org/10.1007/s10530-009-9664-4	No	Animalia	Chordata	Mammalia	Rodentia	Myocastoridae	Myocastor	Myocastor coypus		Nutria	Semi-aquatic	Semi-aquatic			other			Europe	Italy		Diverse/Unspecified	Country	1995-2000	Period	1995	2000	1995	2000	One-time	10696583			1.73303e+07	1.56085e+07	1.78276e+06	2.88839e+06	2.60142e+06	EUR	2007
IC_1.0_176	181	WoS	12448	Costing eradications of alien mammals from islands	Martins et al		2006	English	Peer-reviewed article	NA	Yes	Animalia	Chordata	Mammalia	Rodentia	Muridae	Rattus	Rattus sp.		Rats	Terrestrial	Terrestrial			other	Y	Y	Africa	Seychelles		Bird	Site	1996	Year	1996	Unspecified	1996	1996	One-time	5169			6887.55	11419.7	5169	6887.55	11419.7	USD	2003
IC_1.0_177	182	WoS	12448	Costing eradications of alien mammals from islands	Martins et al		2006	English	Peer-reviewed article	NA	Yes	Animalia	Chordata	Mammalia	Rodentia	Muridae	Rattus	Rattus sp.		Rats	Terrestrial	Terrestrial			other	Y	Y	South America	United Kingdom		Falklands (Bottom)	Site	2001	Year	2001	Unspecified	2001	2001	One-time	3201			4265.25	3749.62	3201	4265.25	3749.62	USD	2003
IC_1.0_178	183	WoS	12448	Costing eradications of alien mammals from islands	Martins et al		2006	English	Peer-reviewed article	NA	Yes	Animalia	Chordata	Mammalia	Rodentia	Muridae	Rattus	Rattus sp.		Rats	Terrestrial	Terrestrial	forest of silver beech Nothofagusmenziesii and scrub	1	other	Y	Y	Oceania	New Zealand		Breaksea Island	Site	1990	Year	1990	Unspecified	1990	1990	One-time	48796			65019.4	74779.8	48796	65019.4	74779.8	USD	2003
IC_1.0_179	184	WoS	12448	Costing eradications of alien mammals from islands	Martins et al		2006	English	Peer-reviewed article	NA	Yes	Animalia	Chordata	Mammalia	Rodentia	Muridae	Rattus	Rattus norvegicus		Brown rat	Terrestrial	Terrestrial			other	Y	Y	Oceania	New Zealand		Campbell	Site	2003	Year	2003	Unspecified	2003	2003	One-time	1249726			1.66523e+06	1.9152e+06	1249726	1.66523e+06	1.9152e+06	USD	2003
IC_1.0_181	186	WoS	12448	Costing eradications of alien mammals from islands	Martins et al		2006	English	Peer-reviewed article	NA	Yes	Animalia	Chordata	Mammalia	Rodentia	Muridae	Rattus	Rattus sp.		Rats	Terrestrial	Terrestrial			other	Y	Y	Africa	Seychelles		Curieuse	Site	2000	Year	2000	Unspecified	2000	2000	One-time	67290			89662.1	148661	67290	89662.1	148661	USD	2003
IC_1.0_182	187	WoS	12448	Costing eradications of alien mammals from islands	Martins et al		2006	English	Peer-reviewed article	NA	Yes	Animalia	Chordata	Mammalia	Rodentia	Muridae	Rattus	Rattus sp.		Rats	Terrestrial	Terrestrial			other	Y	Y	Oceania	New Zealand		Cuvier	Site	1993	Year	1993	Unspecified	1993	1993	One-time	16968			22609.4	26003.5	16968	22609.4	26003.5	USD	2003
IC_1.0_183	188	WoS	12448	Costing eradications of alien mammals from islands	Martins et al		2006	English	Peer-reviewed article	NA	Yes	Animalia	Chordata	Mammalia	Rodentia	Muridae	Rattus	Rattus sp.		Rats	Terrestrial	Terrestrial			other	Y	Y	Africa	Seychelles		Denis Island	Site	2000	Year	2000	Unspecified	2000	2000	One-time	56994			75943	125915	56994	75943	125915	USD	2003
IC_1.0_184	189	WoS	12448	Costing eradications of alien mammals from islands	Martins et al		2006	English	Peer-reviewed article	NA	Yes	Animalia	Chordata	Mammalia	Rodentia	Muridae	Rattus	Rattus sp.		Rats	Terrestrial	Terrestrial			other		Y	South America	United Kingdom		Falklands (Double)	Site	2001	Year	2001	Unspecified	2001	2001	One-time	370			493.015	433.414	370	493.015	433.414	USD	2003
IC_1.0_185	190	WoS	12448	Costing eradications of alien mammals from islands	Martins et al		2006	English	Peer-reviewed article	NA	Yes	Animalia	Chordata	Mammalia	Rodentia	Muridae	Rattus	Rattus exulans		Polynesian rat	Terrestrial	Terrestrial	The forest canopy consists of red mapou (Myrsine australis), mahoe (Melicytus ramiflorus), with emergent pohutukawa (Metrosideros excelsa)	1	other	Y	Y	Oceania	New Zealand		Double Islands (Larger island)	Site	1989	Year	1989	Unspecified	1989	1989	One-time	3271			4358.52	5012.81	3271	4358.52	5012.81	USD	2003
IC_1.0_186	191	WoS	12448	Costing eradications of alien mammals from islands	Martins et al		2006	English	Peer-reviewed article	NA	Yes	Animalia	Chordata	Mammalia	Rodentia	Muridae	Rattus	Rattus exulans		Polynesian rat	Terrestrial	Terrestrial	The forest canopy consists of red mapou (Myrsine australis), mahoe (Melicytus ramiflorus), with emergent pohutukawa (Metrosideros excelsa)	1	other	Y	Y	Oceania	New Zealand		Double Islands (Smaller island)	Site	1989	Year	1989	Unspecified	1989	1989	One-time	1919			2557.02	2940.87	1919	2557.02	2940.87	USD	2003
IC_1.0_187	192	WoS	12448	Costing eradications of alien mammals from islands	Martins et al		2006	English	Peer-reviewed article	NA	Yes	Animalia	Chordata	Mammalia	Rodentia	Muridae	Rattus	Rattus sp.		Rats	Terrestrial	Terrestrial			other	Y	Y	Pacific Islands	United Kingdom		Pitcairn Islands (Ducie)	Site	1998	Year	1998	Unspecified	1998	1998	One-time	32191			42893.7	37708.2	32191	42893.7	37708.2	USD	2003
IC_1.0_189	194	WoS	12448	Costing eradications of alien mammals from islands	Martins et al		2006	English	Peer-reviewed article	NA	Yes	Animalia	Chordata	Mammalia	Rodentia	Muridae	Rattus	Rattus sp.		Rats	Terrestrial	Terrestrial			other	Y	Y	Africa	Mauritius		Flat	Site	1998	Year	1998	Unspecified	1998	1998	One-time	64381			85786	183257	64381	85786	183257	USD	2003
IC_1.0_190	195	WoS	12448	Costing eradications of alien mammals from islands	Martins et al		2006	English	Peer-reviewed article	NA	Yes	Animalia	Chordata	Mammalia	Rodentia	Muridae	Rattus	Rattus sp.		Rats	Terrestrial	Terrestrial			other		Y	Africa	Seychelles		Fregate	Site	2000	Year	2000	Unspecified	2000	2000	One-time	61916			82501.4	136789	61916	82501.4	136789	USD	2003
IC_1.0_192	197	WoS	12448	Costing eradications of alien mammals from islands	Martins et al		2006	English	Peer-reviewed article	NA	Yes	Animalia	Chordata	Mammalia	Rodentia	Muridae	Rattus	Rattus sp.		Rats	Terrestrial	Terrestrial			other		Y	Central America	Antigua and Barbuda		Green Island	Site	2001	Year	2001	Unspecified	2001	2001	One-time	16115			21472.8	33909.8	16115	21472.8	33909.8	USD	2003
IC_1.0_193	198	WoS	12448	Costing eradications of alien mammals from islands	Martins et al		2006	English	Peer-reviewed article	NA	Yes	Animalia	Chordata	Mammalia	Rodentia	Muridae	Rattus	Rattus sp.		Rats	Terrestrial	Terrestrial			other	Y	Y	Oceania	New Zealand		Hawea Island	Site	1986	Year	1986	Unspecified	1986	1986	One-time	36101			48103.6	55324.8	36101	48103.6	55324.8	USD	2003
IC_1.0_195	200	WoS	12448	Costing eradications of alien mammals from islands	Martins et al		2006	English	Peer-reviewed article	NA	Yes	Animalia	Chordata	Mammalia	Rodentia	Muridae	Rattus	Rattus sp.		Rats	Terrestrial	Terrestrial			other	Y	Y	Oceania	New Zealand		Korapuki Island	Site	1987	Year	1987	Unspecified	1987	1987	One-time	3858			5140.68	5912.38	3858	5140.68	5912.38	USD	2003
IC_1.0_198	203	WoS	12448	Costing eradications of alien mammals from islands	Martins et al		2006	English	Peer-reviewed article	NA	Yes	Animalia	Chordata	Mammalia	Rodentia	Muridae	Rattus	Rattus sp.		Rats	Terrestrial	Terrestrial			other	Y	Y	Oceania	New Zealand		Mokohinau	Site	1991	Year	1991	Unspecified	1991	1991	One-time	21621			28809.4	33134.2	21621	28809.4	33134.2	USD	2003
IC_1.0_199	204	WoS	12448	Costing eradications of alien mammals from islands	Martins et al		2006	English	Peer-reviewed article	NA	Yes	Animalia	Chordata	Mammalia	Rodentia	Muridae	Rattus	Rattus sp.		Rats	Terrestrial	Terrestrial			other	Y	Y	Oceania	New Zealand		Mou Waho	Site	1996	Year	1996	Unspecified	1996	1996	One-time	8243			10983.6	12632.4	8243	10983.6	12632.4	USD	2003
IC_1.0_200	205	WoS	12448	Costing eradications of alien mammals from islands	Martins et al		2006	English	Peer-reviewed article	NA	Yes	Animalia	Chordata	Mammalia	Rodentia	Muridae	Rattus	Rattus sp.		Rats	Terrestrial	Terrestrial			other		Y	Oceania	New Zealand		Otata	Site	1991	Year	1991	Unspecified	1991	1991	One-time	8208			10936.9	12578.8	8208	10936.9	12578.8	USD	2003
IC_1.0_201	206	WoS	12448	Costing eradications of alien mammals from islands	Martins et al		2006	English	Peer-reviewed article	NA	Yes	Animalia	Chordata	Mammalia	Rodentia	Muridae	Rattus	Rattus sp.		Rats	Terrestrial	Terrestrial			other		Y	South America	United Kingdom		Falklands (Outer)	Site	2001	Year	2001	Unspecified	2001	2001	One-time	895			1192.56	1048.39	895	1192.56	1048.39	USD	2003
IC_1.0_202	207	WoS	12448	Costing eradications of alien mammals from islands	Martins et al		2006	English	Peer-reviewed article	NA	Yes	Animalia	Chordata	Mammalia	Rodentia	Muridae	Rattus	Rattus sp.		Rats	Terrestrial	Terrestrial			other	Y	Y	Pacific Islands	United States of America		Palmyra Atoll	Site	2001	Year	2001	Unspecified	2001	2001	Potentially ongoing	111007			147914	147914	111007	147914	147914	USD	2003
IC_1.0_204	209	WoS	12448	Costing eradications of alien mammals from islands	Martins et al		2006	English	Peer-reviewed article	NA	Yes	Animalia	Chordata	Mammalia	Rodentia	Muridae	Rattus	Rattus sp.		Rats	Terrestrial	Terrestrial			other	Y	Y	Europe	United Kingdom		Ramsey	Site	2000	Year	2000	Unspecified	2000	2000	One-time	28972			38604.4	33937.5	28972	38604.4	33937.5	USD	2003
IC_1.0_206	211	WoS	12448	Costing eradications of alien mammals from islands	Martins et al		2006	English	Peer-reviewed article	NA	Yes	Animalia	Chordata	Mammalia	Rodentia	Muridae	Rattus	Rattus sp.		Rats	Terrestrial	Terrestrial			other	Y	Y	Oceania	New Zealand		Red Mercury	Site	1992	Year	1992	Unspecified	1992	1992	One-time	24126			32147.3	36973.1	24126	32147.3	36973.1	USD	2003
IC_1.0_208	213	WoS	12448	Costing eradications of alien mammals from islands	Martins et al		2006	English	Peer-reviewed article	NA	Yes	Animalia	Chordata	Mammalia	Rodentia	Muridae	Rattus	Rattus sp.		Rats	Terrestrial	Terrestrial			other	Y	Y	Oceania	New Zealand		Rurima Island	Site	1984	Year	1984	Unspecified	1984	1984	One-time	7366			9815	11288.4	7366	9815	11288.4	USD	2003
IC_1.0_209	214	WoS	12448	Costing eradications of alien mammals from islands	Martins et al		2006	English	Peer-reviewed article	NA	Yes	Animalia	Chordata	Mammalia	Rodentia	Muridae	Rattus	Rattus sp.		Rats	Terrestrial	Terrestrial			other	Y	Y	Oceania	Australia		Sandy Lacepede	Site	1986	Year	1986	Unspecified	1986	1986	One-time	51653			68826.2	78266.9	51653	68826.2	78266.9	USD	2003
IC_1.0_210	215	WoS	12448	Costing eradications of alien mammals from islands	Martins et al		2006	English	Peer-reviewed article	NA	Yes	Animalia	Chordata	Mammalia	Rodentia	Muridae	Rattus	Rattus sp.		Rats	Terrestrial	Terrestrial			other	Y	Y	Asia	Indonesia		Sangalaki	Site	2003	Year	2003	Unspecified	2003	2003	One-time	2800			3730.93	18595.5	2800	3730.93	18595.5	USD	2003
IC_1.0_212	217	WoS	12448	Costing eradications of alien mammals from islands	Martins et al		2006	English	Peer-reviewed article	NA	Yes	Animalia	Chordata	Mammalia	Rodentia	Muridae	Rattus	Rattus sp.		Rats	Terrestrial	Terrestrial			other	Y	Y	Oceania	New Zealand		Tawhitinui	Site	1983	Year	1983	Unspecified	1983	1983	One-time	4225			5629.7	6474.81	4225	5629.7	6474.81	USD	2003
IC_1.0_213	218	WoS	12448	Costing eradications of alien mammals from islands	Martins et al		2006	English	Peer-reviewed article	NA	Yes	Animalia	Chordata	Mammalia	Rodentia	Muridae	Rattus	Rattus sp.		Rats	Terrestrial	Terrestrial			other	Y	Y	South America	United Kingdom		Falklands (Top)	Site	2000	Year	2000	Unspecified	2000	2000	One-time	2974			3962.78	3483.71	2974	3962.78	3483.71	USD	2003
IC_1.0_217	222	TC	203	Benefits, constraints, risks and costs of rodent control options on Lord Howe Island. Lincoln, New Zealand: Landcare Research Ltd	Parkes et al		2004	English	Official report	Wilcox, C., & Donlan, J. (2007). Compensatory mitigation as a solution to fisheries bycatch-biodiversity conservation conflicts. Frontiers in Ecology and the Environment, 5(6), 325–331. https://doi.org/10.1890/1540-9295(2007)5[325:CMAAST]2.0.CO;3	No	Animalia	Chordata	Mammalia	Rodentia	Muridae	Rattus	Rattus rattus		Black rat	Terrestrial	Terrestrial			other	Y	Y	Oceania	Australia		Lord Howe Island	Site	Unspecified	Year	Unspecified	Unspecified	2004	2004	One-time	500640			649696	647226	500640	649696	647226	USD	2004
IC_1.0_218	223	TC	203	Benefits, constraints, risks and costs of rodent control options on Lord Howe Island. Lincoln, New Zealand: Landcare Research Ltd	Parkes et al		2004	English	Official report	Wilcox, C., & Donlan, J. (2007). Compensatory mitigation as a solution to fisheries bycatch-biodiversity conservation conflicts. Frontiers in Ecology and the Environment, 5(6), 325–331. https://doi.org/10.1890/1540-9295(2007)5[325:CMAAST]2.0.CO;3	No	Animalia	Chordata	Mammalia	Rodentia	Muridae	Rattus	Rattus rattus		Black rat	Terrestrial	Terrestrial			other	Y	Y	Oceania	Australia		Lord Howe Island	Site	2004	Year	2004	Unspecified	2004	2004	Potentially ongoing	39000			50611.5	50419.1	39000	50611.5	50419.1	USD	2004
IC_1.0_223	228	TC	325	Feral Himalayan porcupines in Devon	Smallshire and Davey		1989	English	Official report	Helmstedt, K. J., Shaw, J. D., Bode, M., Terauds, A., Springer, K., Robinson, S. A., & Possingham, H. P. (2016). Prioritizing eradication actions on islands: it’s not all or nothing. Journal of Applied Ecology, 53(3), 733–741. https://doi.org/10.1111/1365-2664.12599 --> Gregory, S., Henderson, W., Smee, E., & Cassey, P. (2014). Eradications of vertebrate pests in Australia	No	Animalia	Chordata	Mammalia	Rodentia	Hystricidae	Hystrix	Hystrix brachyura		Himalayan porcupines	Terrestrial	Terrestrial			other		Y	Europe	United Kingdom		Devon	Site	1989	Year	1989	1989	1989	1989	One-time	230000			259834	247944	230000	259834	247944	EUR	2016
IC_1.0_280	287	TC	564	The economic impacts of vertebrate pests in Australia	Gong et al		2009	English	Official report	NA	Yes	Animalia	Chordata	Mammalia	Rodentia	Muridae	Mus	Mus musculus		House mouse	Terrestrial	Terrestrial			other		Y	Oceania	Australia		Darling Downs/Queensland	Site	2009	Year	2009	Unspecified	2009	2009	Potentially ongoing	2000000			1.78219e+06	1.58494e+06	2000000	1.78219e+06	1.58494e+06	AUD	2009
IC_1.0_313	320	WoS	7807	Minimising number killed in long-term vertebrate pest management programmes, and associated economic incentives	Warburton et al		2012	English	Peer-reviewed article	NA	Yes	Animalia	Chordata	Mammalia	Rodentia	Muridae	Rattus	Rattus rattus		Black rat	Terrestrial	Terrestrial			other		Y	Oceania	New Zealand		NA	Unit (100 Ha)	2012	Year	2012	Unspecified	2012	2012	Potentially ongoing	800	200	800	691.979	571.065	800	691.979	571.065	NZD	2012
IC_1.0_332	339	TC	225	Correction: Reporting costs for invasive vertebrate eradications	Holmes et al		2015	English	Peer-reviewed article	NA	Yes	Animalia	Chordata	Mammalia	Rodentia	Muridae	Diverse/Unspecified	Diverse/Unspecified		Rodents	Terrestrial	Terrestrial			other		Y	North America	United States of America		Navassa Atoll	Unit (471 Ha)	Unspecified	Year	Unspecified	Unspecified	2015	2015	One-time	1752000			1.84347e+06	1.84347e+06	1752000	1.84347e+06	1.84347e+06	USD	2013
IC_1.0_336	343	TC	498	Response of Wedge-tailed Shearwaters ( Puffinus pacificus ) to Eradication of Black Rats (Rattus rattus) from Mokuauia Island after Reinvasion	Marie et al		2014	English	Peer-reviewed article	Holmes et al. 2015. Correction: Reporting costs for invasive vertebrate eradications	Yes	Animalia	Chordata	Mammalia	Rodentia	Muridae	Rattus	Rattus rattus		Black rat	Terrestrial	Terrestrial			other	Y	Y	Pacific Islands	United States of America	Hawaii	Hawaii (Moku'auia)	Unit (5 Ha)	4 months (October 2011 to January 2012)	Year	2012	2012	2012	2012	One-time	1268			1312.9	1312.9	1268	1312.9	1312.9	USD	2014
IC_1.0_337	344	TC	225	Correction: Reporting costs for invasive vertebrate eradications	Holmes et al		2015	English	Peer-reviewed article	NA	Yes	Animalia	Chordata	Mammalia	Rodentia	Muridae	Diverse/Unspecified	Diverse/Unspecified		Rodents	Terrestrial	Terrestrial			other		Y	Central America	The Bahamas		Allen Cay	Unit (6 Ha)	Until 2012	Period	Unspecified	2012		2012	One-time	137000			144153					USD	2013
IC_1.0_338	345	TC	225	Correction: Reporting costs for invasive vertebrate eradications	Holmes et al		2015	English	Peer-reviewed article	NA	Yes	Animalia	Chordata	Mammalia	Rodentia	Muridae	Rattus	Rattus exulans/Rattus tanezumi		Polynesian rat/Tanezumi rat	Terrestrial	Terrestrial			other		Y	Pacific Islands	United States of America		Wake Atoll	Site	Until 2012	Period	Unspecified	2012		2012	One-time	2020000			2.12546e+06	2.12546e+06				USD	2013
IC_1.0_339	347	TC	328	FINAL ENVIRONMENTAL IMPACT STATEMENT. Palmyra Atoll National Wildlife Refuge Rat Eradication Project	United States Fish and Wildlife Service		2011	English	Official report	Holmes et al. 2016. Correction: Reporting costs for invasive vertebrate eradications	Yes	Animalia	Chordata	Mammalia	Rodentia	Muridae	Rattus	Rattus rattus		Black rat	Terrestrial	Terrestrial			other	Y	Y	Oceania/Pacific Islands	United States of America		Palmyra Atoll	Unit (250 Ha)	Unspecified	Year	Unspecified	Unspecified	2011	2011	One-time	1915900			2.01593e+06	2.01593e+06	1915900	2.01593e+06	2.01593e+06	USD	2013
IC_1.0_340	348	TC	225	Correction: Reporting costs for invasive vertebrate eradications	Holmes et al		2015	English	Peer-reviewed article	NA	Yes	Animalia	Chordata	Mammalia	Rodentia	Muridae	Diverse/Unspecified	Diverse/Unspecified		Rodents	Terrestrial	Terrestrial			other		Y	Oceania/Pacific Islands	France		French Polynesia (Tahanea)	Unit (6 Ha)	Until 2011	Period	Unspecified	2011		2011	One-time	70000			73654.6	68347.4				USD	2013
IC_1.0_341	349	TC	225	Correction: Reporting costs for invasive vertebrate eradications	Holmes et al		2015	English	Peer-reviewed article	NA	Yes	Animalia	Chordata	Mammalia	Rodentia	Muridae	Diverse/Unspecified	Diverse/Unspecified		Rodents	Terrestrial	Terrestrial			other	Y	Y	South America	Ecuador	Galapagos Islands	Rabida	Unit (706 ha)	Until 2011	Period	Unspecified	2011		2011	One-time	426000			448241	814508				USD	2013
IC_1.0_342	350	TC	451	Operational report for Kiore Eradication in the Taranga (Hen) Island	Hawkins		2011	English	Official report	Holmes et al. 2015. Correction: Reporting costs for invasive vertebrate eradications	Yes	Animalia	Chordata	Mammalia	Rodentia	Muridae	Diverse/Unspecified	Diverse/Unspecified		Rodents	Terrestrial	Terrestrial			other		Y	Oceania	New Zealand		Taranga	Unit (509 Ha)	Until 2011	Period	Unspecified	2011		2011	One-time	185000			201597	171735				USD	2011
IC_1.0_345	353	TC	225	Correction: Reporting costs for invasive vertebrate eradications	Holmes et al		2015	English	Peer-reviewed article	Holmes et al. 2015. Correction: Reporting costs for invasive vertebrate eradications	Yes	Animalia	Chordata	Mammalia	Rodentia	Muridae	Diverse/Unspecified	Diverse/Unspecified		Rodents	Terrestrial	Terrestrial			other		Y	Oceania	New Zealand		Rangitoto/Motutapu	Unit (3,842 Ha)	Until 2009	Period	Unspecified	2009		2009	One-time	1758000			1.8181e+06	1.7812e+06				USD	2015
IC_1.0_348	356	WoS	6274	Rapid assessment of rat eradication after aerial baiting	Samaniego-Herrera et al		2013	English	Peer-reviewed article	NA	Yes	Animalia	Chordata	Mammalia	Rodentia	Muridae	Diverse/Unspecified	Diverse/Unspecified		Rodents	Terrestrial	Terrestrial			other	Y	Y	North America	Mexico		Isabel Island	Unit (82 Ha)	Until 2009	Period	Unspecified	2009		2009	One-time	268421			282435	457521				USD	2013
IC_1.0_349	357	WoS	6274	Rapid assessment of rat eradication after aerial baiting	Samaniego-Herrera et al		2013	English	Peer-reviewed article	NA	Yes	Animalia	Chordata	Mammalia	Rodentia	Muridae	Diverse/Unspecified	Diverse/Unspecified		Rodents	Terrestrial	Terrestrial			other	Y	Y	North America	Mexico		Isabel Island	Unit (82 Ha)	After 2009	Year	2009	Unspecified	2009	2009	One-time	39750			41825.3	67753.5	39750	41825.3	67753.5	USD	2013
IC_1.0_350	358	TC	225	Correction: Reporting costs for invasive vertebrate eradications	Holmes et al		2015	English	Peer-reviewed article	NA	Yes	Animalia	Chordata	Mammalia	Rodentia	Muridae	Diverse/Unspecified	Diverse/Unspecified		Rodents	Terrestrial	Terrestrial			other		Y	North America	United States of America		Rat island	Unit (2,800 Ha)	Until 2008	Period	Unspecified	2008		2008	One-time	2522000			2.65367e+06	2.65367e+06				USD	2013
IC_1.0_351	359	TC	204	Beyond Kapiti - a decade of invasive rodent eradications from New Zealand islands + Unpublished data	Broome		2009	English	Peer-reviewed article	Holmes et al. 2016. Correction: Reporting costs for invasive vertebrate eradications	Yes	Animalia	Chordata	Mammalia	Rodentia	Muridae	Rattus	Rattus exulans		Polynesian rat	Terrestrial	Terrestrial			other	Y	Y	Oceania	New Zealand		Little Barrier	Unit (3,083 Ha)	Until 2004	Period	Unspecified	2004		2004	One-time	520700			594927	647651				USD	2009
IC_1.0_352	360	TC	294	Eradication of black rats Rattus rattus from Anacapa Island	Howald et al		2010	English	Peer-reviewed article	Holmes et al. 2016. Correction: Reporting costs for invasive vertebrate eradications	Yes	Animalia	Chordata	Mammalia	Rodentia	Muridae	Diverse/Unspecified	Diverse/Unspecified		Rodents	Terrestrial	Terrestrial			other		Y	North America	United States of America		Anacapa	Unit (296 Ha)	2 years	Period	2008	2010	2008	2010	One-time	1800000			1.89398e+06	1.89398e+06	900000	946988	946988	USD	2013
IC_1.0_354	362	GS	299	Beyond Kapiti - a decade of invasive rodent eradications from new zealand islands	Broome		2009	English	Peer-reviewed article	NA	Yes	Animalia	Chordata	Mammalia	Rodentia	Muridae	Rattus	Rattus exulans/Rattus norvegicus		Polynesian rat/Brown rat	Terrestrial	Terrestrial			other		Y	Oceania	New Zealand		Raoul	Unit (2,941 Ha)	2002	Year	2002	Unspecified	2002	2002	One-time	866000			989450	1.07714e+06	866000	989450	1.07714e+06	USD	2009
IC_1.0_355	363	GS	299	Beyond Kapiti - a decade of invasive rodent eradications from new zealand islands	Broome		2009	English	Peer-reviewed article	NA	Yes	Animalia	Chordata	Mammalia	Rodentia	Muridae	Rattus	Rattus exulans/Rattus norvegicus		Polynesian rat/Brown rat	Terrestrial	Terrestrial			other	Y	Y	Oceania	New Zealand		Kapiti Island	Unit (2,941 Ha)	1996	Year	1996	Unspecified	1996	1996	One-time	428200			612408	666681	536000	612408	666681	USD	2009
IC_1.0_356	364	GS	299	Beyond Kapiti - a decade of invasive rodent eradications from new zealand islands	Broome		2009	English	Peer-reviewed article	NA	Yes	Animalia	Chordata	Mammalia	Rodentia	Muridae	Rattus	Rattus exulans		Polynesian rat	Terrestrial	Terrestrial			other	Y	Y	Oceania	New Zealand		Whenua Hou (Codfish)	Site	1998	Year	1998	Unspecified	1998	1998	One-time	387400			571276	621904	500000	571276	621904	USD	2009
IC_1.0_357	365	GS	299	Beyond Kapiti - a decade of invasive rodent eradications from new zealand islands	Broome		2009	English	Peer-reviewed article	NA	Yes	Animalia	Chordata	Mammalia	Rodentia	Muridae	Rattus	Rattus exulans/Rattus norvegicus		Polynesian rat/Brown rat	Terrestrial	Terrestrial	Forest	1	other	Y	Y	Oceania	New Zealand		Tuhua	Site	2000	Year	2000	Unspecified	2000	2000	One-time	136500			204060	222144	178600	204060	222144	USD	2009
IC_1.0_358	366	GS	299	Beyond Kapiti - a decade of invasive rodent eradications from new zealand islands	Broome		2009	English	Peer-reviewed article	NA	Yes	Animalia	Chordata	Mammalia	Rodentia	Muridae	Rattus	Rattus norvegicus		Brown rat	Terrestrial	Terrestrial			other	Y	Y	Oceania	New Zealand		Campbell	Site	2001	Year	2001	Unspecified	2001	2001	One-time	1868700			2.87923e+06	3.1344e+06	2520000	2.87923e+06	3.1344e+06	USD	2009
IC_1.0_359	367	GS	299	Beyond Kapiti - a decade of invasive rodent eradications from new zealand islands	Broome		2009	English	Peer-reviewed article	NA	Yes	Animalia	Chordata	Mammalia	Rodentia	Muridae	Rattus	Rattus exulans/Rattus norvegicus		Polynesian rat/Brown rat	Terrestrial	Terrestrial			other		Y	Oceania	New Zealand		Titi Islands/Taukihepa/Rerewhakaupoko/Pukeweka/Mokonui	Site	2006	Year	2006	Unspecified	2006	2006	One-time	163200			285067	310330	249500	285067	310330	USD	2009
IC_1.0_360	368	GS	299	Beyond Kapiti - a decade of invasive rodent eradications from new zealand islands	Broome		2009	English	Peer-reviewed article	NA	Yes	Animalia	Chordata	Mammalia	Rodentia	Muridae	Mus/Rattus	Mus musculus/Rattus rattus		House mouse/Black rat	Terrestrial	Terrestrial			other		Y	Oceania	New Zealand		Pomona/Rona	Site	2007	Year	2007	Unspecified	2007	2007	One-time	39200			70266.9	76494.2	61500	70266.9	76494.2	USD	2009
IC_1.0_362	370	TC	572	The eradication of Norway rats, kiore and feral cats from Tuhua (Mayor Island)	Williams and Jones		2002	English	Peer-reviewed article	Holmes et al. 2015. Correction: Reporting costs for invasive vertebrate eradications	Yes	Animalia	Chordata	Mammalia	Rodentia	Muridae	Diverse/Unspecified	Diverse/Unspecified		Rodents	Terrestrial	Terrestrial	Forest	1	other	Y	Y	Oceania	New Zealand		Tuhua	Site	Unspecified	Year	Unspecified	Unspecified	2002	2002	One-time	105000			149463	227796	105000	149463	227796	USD	2000
IC_1.0_363	371	TC	598	The successful eradication of introduced roof rats (Rattus rattus) from Buck Island using diphacinone, followed by an irruption of house mice (Mus musculus)	Witmer et al		2007	English	Peer-reviewed article	Holmes et al. 2015. Correction: Reporting costs for invasive vertebrate eradications	Yes	Animalia	Chordata	Mammalia	Rodentia	Muridae	Diverse/Unspecified	Diverse/Unspecified		Rodents	Terrestrial	Terrestrial			other	Y	Y	North America	United States of America		Buck	Unit (80 Ha)	1998-2005	Year	1998	2005	1998	2005	One-time	33500			39603.6	39603.6	33500	39603.6	39603.6	USD	2007
IC_1.0_366	374	TC	445	Offshore Islands co-operative conservation project with ICI crop care division: Phase One (Stanley Island)	Towns et al		1993	English	Official report	Holmes et al. 2015. Correction: Reporting costs for invasive vertebrate eradications	Yes	Animalia	Chordata	Mammalia	Rodentia	Muridae	Rattus	Rattus exulans		Pacific rat	Terrestrial	Terrestrial	the forest vegetation was reduced to an open woodland (mostly of pohutukawa, Metrosideros excelsa) that lacked an understorey.		other	Y	Y	Oceania	New Zealand		Cuvier	Unit (170 Ha)	September 1993-March 1994	Year	1994	1994	1994	1994	One-time	30765			32474.9	33821.4	30765	32474.9	33821.4	NZD	1995
IC_1.0_367	375	TC	446	Offshore Islands co-operative conservation project with ICI crop care division: Phase Two (Red Mercury Island)	Towns et al		1993	English	Official report	Holmes et al. 2015. Correction: Reporting costs for invasive vertebrate eradications	Yes	Animalia	Chordata	Mammalia	Rodentia	Muridae	Rattus	Rattus exulans		Pacific rat	Terrestrial	Terrestrial			other	Y	Y	Oceania	New Zealand		Red Mercury	Unit (225 Ha)	Sept 1992 + 36 weeks of monitoring	Year	1992	1992	1992	1992	One-time	41728			40915.9	47112.2	41728	40915.9	47112.2	NZD	1994
IC_1.0_368	376	TC	612	Using Brodifacoum to eradicate kiore (Rattus exulans) from Burgess Island and the Knights group of the Mokohinau Islands	McFadden and Greene		1994	English	Official report	Holmes et al. 2015. Correction: Reporting costs for invasive vertebrate eradications	Yes	Animalia	Chordata	Mammalia	Rodentia	Muridae	Diverse/Unspecified	Diverse/Unspecified		Rodents	Terrestrial	Terrestrial			other		Y	Oceania	New Zealand		Burgess Mokohinau	Unit (100 Ha)	1993	Year	1993	1993	1993	1993	One-time	30075	16110	44040	27577.1	34394.3	30075	27577.1	34394.3	NZD	1993
IC_1.0_369	377	TC	445	Offshore Islands co-operative conservation project with ICI crop care division: Phase One (Stanley Island)	Towns et al		1993	English	Official report	Holmes et al. 2015. Correction: Reporting costs for invasive vertebrate eradications	Yes	Animalia	Chordata	Mammalia	Rodentia	Muridae	Diverse/Unspecified	Diverse/Unspecified		Rodents	Terrestrial	Terrestrial			other		Y	Oceania	New Zealand		Stanley	Unit (100 Ha)	July 1991-June 1992	Year	1992	1992	1992	1992	One-time	36603			33562.9	41859.9	36603	33562.9	41859.9	NZD	1993
IC_1.0_370	378	TC	302	Eradication of Kiore (Rattus exulans) from Double Island, Mercury Group in Northern New Zealand	McFadden		1992	English	Official report	Holmes et al. 2015. Correction: Reporting costs for invasive vertebrate eradications	Yes	Animalia	Chordata	Mammalia	Rodentia	Muridae	Rattus	Rattus exulans		Polynesian rat	Terrestrial	Terrestrial	The forest canopy consists of red mapou (Myrsine australis), mahoe (Melicytus ramiflorus), with emergent pohutukawa (Metrosideros excelsa)	1	other	Y	Y	Oceania	New Zealand		Double Islands (Larger island)	Unit (19 Ha)	October 1989	Period	1989	1989	1989	1989	One-time	19850			34676	43407.5				USD	1992
IC_1.0_371	379	TC	302	Eradication of Kiore (Rattus exulans) from Double Island, Mercury Group in Northern New Zealand	McFadden		1992	English	Official report	Holmes et al. 2015. Correction: Reporting costs for invasive vertebrate eradications	Yes	Animalia	Chordata	Mammalia	Rodentia	Muridae	Rattus	Rattus exulans		Polynesian rat	Terrestrial	Terrestrial	The forest canopy consists of red mapou (Myrsine australis), mahoe (Melicytus ramiflorus), with emergent pohutukawa (Metrosideros excelsa)	1	other	Y	Y	Oceania	New Zealand		Double Islands (Smaller island)	Unit (8 Ha)	November 1989	Period	1989	1989	1989	1989	One-time	14915			26055.1	32615.8				USD	1992
IC_1.0_372	380	TC	292	Eradication campaigns against kiore (Rattus exulans) on Rurima Rocks and Korapuki Island, Northern New Zealand	McFadden and Towns		1991	English	Official report	Holmes et al. 2015. Correction: Reporting costs for invasive vertebrate eradications	Yes	Animalia	Chordata	Mammalia	Rodentia	Muridae	Rattus	Rattus exulans		Polynesian rat	Terrestrial	Terrestrial	Korapuki has been extensively burnt in the past leaving remnants of the original vegetation only on two rocky promontories. Species present in the remnants include milk tree (Paratrophis banksii), karaka (Corynocarpus laevigatus), kawakawa (Macropiper excelsum), karo (Pittosporum crassifolium), wharangi (Melicope ternata), and some native herbaceous plants. The rest of the island is covered by a …	2\3	other	Y	Y	Oceania	New Zealand		Korapuki Island	Site	1986-1987	Year	1986	1987	1987	1987	One-time	6800			7610.67	8295.65	6800	7610.67	8295.65	NZD	1990
IC_1.0_373	381	TC	292	Eradication campaigns against kiore (Rattus exulans) on Rurima Rocks and Korapuki Island, Northern New Zealand	McFadden and Towns		1991	English	Official report	Holmes et al. 2015. Correction: Reporting costs for invasive vertebrate eradications	Yes	Animalia	Chordata	Mammalia	Rodentia	Muridae	Rattus	Rattus exulans		Polynesian rat	Terrestrial	Terrestrial	All four islets of Rurima are capped with pohutukawa (Metrosideros excelsa), and have an understorey of ..	1	other	Y	Y	Oceania	New Zealand		Rurima Island	Unit (8 Ha)	1983-1984	Year	1983	1984	1984	1984	One-time	9985			11175.4	12181.2	9985	11175.4	12181.2	NZD	1990
IC_1.0_376	384	WoS	6888	Changes in the impact and control of an invasive alien: The grey squirrel (Sciurus carolinensis) in Great Britain, as determined from regional surveys	Mayle and Broome		2013	English	Peer-reviewed article	NA	Yes	Animalia	Chordata	Mammalia	Rodentia	Sciuridae	Sciurus	Sciurus carolinensis		Grey squirrel	Terrestrial	Terrestrial			other		Y	Europe	United Kingdom		Diverse/Unspecified	Country	2011	Year	2011	2011	2011	2011	Potentially ongoing	11400000			1.72693e+07	1.09816e+07	11400000	1.72693e+07	1.09816e+07	EUR	2011
IC_1.0_377	385	WoS	6888	Changes in the impact and control of an invasive alien: The grey squirrel (Sciurus carolinensis) in Great Britain, as determined from regional surveys	Mayle and Broome		2013	English	Peer-reviewed article	NA	Yes	Animalia	Chordata	Mammalia	Rodentia	Sciuridae	Sciurus	Sciurus carolinensis		Grey squirrel	Terrestrial	Terrestrial			other		Y	Europe	United Kingdom		NA	Unit (Ha)	1983	Year	1983	Unspecified	1983	1983	Potentially ongoing	22.8			34.5386	21.9631	22.8	34.5386	21.9631	EUR	2011
IC_1.0_378	386	TC	236	Damage by grey squirrels. II. The value of prediction	Kenward and Dutton		1996	English	Peer-reviewed article	Mayle, B. A., & Broome, A. C. (2013). Changes in the impact and control of an invasive alien: The grey squirrel (Sciurus carolinensis) in Great Britain, as determined from regional surveys. Pest Management Science, 69(3), 323–333. https://doi.org/10.1002/ps.3458	No	Animalia	Chordata	Mammalia	Rodentia	Sciuridae	Sciurus	Sciurus carolinensis		Grey squirrel	Terrestrial	Terrestrial			other		Y	Europe	United Kingdom		NA	Unit (beech plantation)	Over 30 years	Period	1966	1996	1966	1996	Potentially ongoing	1.83333			134.099	120.419	1.77419	4.32578	3.88449	GBP	1996
IC_1.0_405	413	WoS	1129	Optimizing confirmation of invasive species eradication with rapid eradication assessment	Russell et al		2017	English	Peer-reviewed article	NA	Yes	Animalia	Chordata	Mammalia	Rodentia	Muridae	Mus	Mus musculus		House mouse	Terrestrial	Terrestrial			other	Y	Y	North America	Mexico		Isla Pajaros/Isla Muertos	Site	2017	Year	2017	2017	2017	2017	One-time	312623			312623		312623	312623		USD	2017
IC_1.0_406	414	WoS	1129	Optimizing confirmation of invasive species eradication with rapid eradication assessment	Russell et al		2017	English	Peer-reviewed article	NA	Yes	Animalia	Chordata	Mammalia	Rodentia	Muridae	Mus	Mus musculus		House mouse	Terrestrial	Terrestrial			other	Y	Y	North America	Mexico		Isla Pajaros/Isla Muertos	Site	2017	Year	2017	2017	2017	2017	One-time	15000			15000		15000	15000		USD	2017
IC_1.0_408	416	WoS	4357	Optimising the application of multiple-capture traps for invasive species management using spatial simulation	Warburton and Gormley		2015	English	Peer-reviewed article	NA	Yes	Animalia	Chordata	Mammalia	Rodentia	Muridae	Rattus	Rattus rattus		Black rat	Terrestrial	Terrestrial			other		Y	Oceania	New Zealand		NA	Unit (Ha)	2015	Year	2015	2015	2015	2015	One-time	650			672.221	658.578	650	672.221	658.578	USD	2015
IC_1.0_409	417	WoS	3738	The impact and legislative framework of invasive mammals on Portuguese Macaronesian islands: A case study on Corvo, Azores	Parejo et al		2015	English	Peer-reviewed article	NA	Yes	Animalia	Chordata	Mammalia	Rodentia	Muridae	Diverse/Unspecified	Diverse/Unspecified		Rodents	Terrestrial	Terrestrial			other	Y	Y	Europe	Portugal		Corvo island	Site	2009-2013	Period	2009	2013	2009	2013	One-time	12000			13763.8	19036.5	2400	2752.75	3807.31	EUR	2015
IC_1.0_412	420	WoS	5924	Using digital data collection tools to improve overall cost-efficiency and provide timely analysis for decision making during invasive species eradication campaigns	Will et al		2014	English	Peer-reviewed article	NA	Yes	Animalia	Chordata	Mammalia	Rodentia	Muridae	Rattus	Rattus norvegicus		Brown rat	Terrestrial	Terrestrial			other		Y	North America	Canada		Haida Gwaii/British Columbia	Site	2 months	Year	Unspecified	Unspecified	2014	2014	One-time	53755			55658.6	50037.7	53755	55658.6	50037.7	USD	2014
IC_1.0_425	433	WoS	6054	Locating species range frontiers: A cost and efficiency comparison of citizen science and hair-tube survey methods for use in tracking an invasive squirrel	Goldstein et al		2014	English	Peer-reviewed article	NA	Yes	Animalia	Chordata	Mammalia	Rodentia	Sciuridae	Sciurus	Sciurus carolinensis		Grey squirrel	Terrestrial	Terrestrial			other		Y	Europe	Ireland		Munster Province	Site	196-730 days	Year	Unspecified	Unspecified	2014	2014	One-time	5794.25	10246.6	12930.4	7948.24	5849.52	5794.25	7948.24	5849.52	EUR	2012
IC_1.0_450	458	TC	203	Benefits, constraints, risks and costs of rodent control options on Lord Howe Island. Lincoln, New Zealand: Landcare Research Ltd	Parkes et al		2004	English	Official report	Pascoe, Sean; Wilcox, Chris; Donlan, C. Josh, 2011. Biodiversity offsets: A cost-effective interim solution to seabird bycatch in fisheriesUnknown ID 8431	No	Animalia	Chordata	Mammalia	Rodentia	Muridae	Diverse/Unspecified	Diverse/Unspecified		Mice and rats	Terrestrial	Terrestrial			other		Y	Oceania	Australia		Diverse/Unspecified	Country	Unspecified	Year	Unspecified	Unspecified	2004	2004	One-time	920000			948656	688852	920000	948656	688852	AUD	2010
IC_1.0_485	493	TC	475	Proceedings nutria and muskrat management symposium. Louisiana Cooperative Extension Service	Hebert		1992	English	Conference proceedings	In Baroch, J., Hafner, M., Brown, T. L., Mach, J., & Poché, M. R. (2002). Nutria (myocastor coypus) in Louisiana. (HW)	No	Animalia	Chordata	Mammalia	Rodentia	Myocastoridae	Myocastor	Myocastor coypus		Nutria	Semi-aquatic	Semi-aquatic			other			North America	United States of America	Louisiana	Louisiana	Site	1991	Year	1991	Unspecified	1991	1991	Potentially ongoing	2000000			3.49381e+06	3.49381e+06	2000000	3.49381e+06	3.49381e+06	USD	1992
IC_1.0_486	494	TC	624	Welfare loss of wetlands disintegration: a Louisiana study	Farber		1996	English	Peer-reviewed article	Baroch, J., Hafner, M., Brown, T. L., Mach, J., & Poché, M. R. (2002). Nutria (myocastor coypus) in Louisiana. (HW)	No	Animalia	Chordata	Mammalia	Rodentia	Myocastoridae	Myocastor	Myocastor coypus		Nutria	Semi-aquatic	Semi-aquatic			other			North America	United States of America	Louisiana	Louisiana	Site	Unspecified	Period	Unspecified	Unspecified			Potentially ongoing	15100000000	5900000000	24300000000	2.83281e+10	2.83281e+10				USD	1990
IC_1.0_487	495	TC	217	Coastal project list narrowed to 19. The Advocate. Baton Rouge, LA	Dunne		2001	English	Official report	Baroch, J., Hafner, M., Brown, T. L., Mach, J., & Poché, M. R. (2002). Nutria (myocastor coypus) in Louisiana. (HW)	No	Animalia	Chordata	Mammalia	Rodentia	Myocastoridae	Myocastor	Myocastor coypus		Nutria	Semi-aquatic	Semi-aquatic			other			North America	United States of America	Louisiana	Louisiana	Site	Unspecified	Year	Unspecified	Unspecified	2001	2001	One-time	1600000			2.21494e+06	2.21494e+06	1600000	2.21494e+06	2.21494e+06	USD	2001
IC_1.0_488	496	TC	443	Nutria (myocastor coypus) in Louisiana	Baroch et al		2002	English	Official report	NA	Yes	Animalia	Chordata	Mammalia	Rodentia	Myocastoridae	Myocastor	Myocastor coypus		Nutria	Semi-aquatic	Semi-aquatic			other			North America	United States of America		Diverse/Unspecified	Country	6 days	Year	Unspecified	Unspecified	2002	2002	One-time	10466	1500	15947	14262.2	14262.2	10466	14262.2	14262.2	USD	2002
IC_1.0_489	497	TC	443	Nutria (myocastor coypus) in Louisiana	Baroch et al		2002	English	Official report	NA	Yes	Animalia	Chordata	Mammalia	Rodentia	Myocastoridae	Myocastor	Myocastor coypus		Nutria	Semi-aquatic	Semi-aquatic			other			North America	United States of America	Louisiana	Louisiana	Site	Unspecified	Year	Unspecified	Unspecified	2002	2002	One-time	1100000	300000	500000	1.49899e+06	1.49899e+06	1100000	1.49899e+06	1.49899e+06	USD	2002
IC_1.0_490	498	TC	443	Nutria (myocastor coypus) in Louisiana	Baroch et al		2002	English	Official report	NA	Yes	Animalia	Chordata	Mammalia	Rodentia	Myocastoridae	Myocastor	Myocastor coypus		Nutria	Semi-aquatic	Semi-aquatic			other			North America	United States of America	Louisiana	Louisiana	Site	2002	Year	2002	Unspecified	2002	2002	Potentially ongoing	6000000			8.17633e+06	8.17633e+06	6000000	8.17633e+06	8.17633e+06	USD	2002
IC_1.0_491	499	TC	443	Nutria (myocastor coypus) in Louisiana	Baroch et al		2002	English	Official report	NA	Yes	Animalia	Chordata	Mammalia	Rodentia	Myocastoridae	Myocastor	Myocastor coypus		Nutria	Semi-aquatic	Semi-aquatic			other			North America	United States of America	Louisiana	Louisiana	Site	5 to 8 years	Period	1997	2002	1997	2002	One-time	7500000			1.02204e+07	1.02204e+07	1250000	1.7034e+06	1.7034e+06	USD	2002
IC_1.0_493	501	WoS	9614	Prioritizing rat eradication on islands by cost and effectiveness to protect nesting seabirds	Capizzi et al		2010	English	Peer-reviewed article	NA	Yes	Animalia	Chordata	Mammalia	Rodentia	Muridae	Rattus	Rattus rattus		Black rat	Terrestrial	Terrestrial			other		Y	Europe	Italy		Islands	Country	2010	Year	2010	2010	2010	2010	One-time	1571000			2.33891e+06	1.72622e+06	1571000	2.33891e+06	1.72622e+06	EUR	2010
IC_1.0_495	503	WoS	8383	Allocating biosecurity resources between preventing, detecting, and eradicating island invasions	Rout et al		2011	English	Peer-reviewed article	NA	Yes	Animalia	Chordata	Mammalia	Rodentia	Muridae	Rattus	Rattus rattus		Black rat	Terrestrial	Terrestrial			other		Y	Oceania	Australia		Barrow Island	Unit (235.9 km²)	2010	Year	2010	2010	2010	2010	One-time	1893079			1.95204e+06	1.41745e+06	1893079	1.95204e+06	1.41745e+06	AUD	2010
IC_1.0_496	504	WoS	8383	Allocating biosecurity resources between preventing, detecting, and eradicating island invasions	Rout et al		2011	English	Peer-reviewed article	NA	Yes	Animalia	Chordata	Mammalia	Rodentia	Muridae	Rattus	Rattus rattus		Black rat	Terrestrial	Terrestrial			other		Y	Oceania	Australia		Barrow Island	Unit (235.9 km²)	2010	Year	2010	2010	2010	2010	One-time	250000			257787	187188	250000	257787	187188	AUD	2010
IC_1.0_497	505	WoS	8383	Allocating biosecurity resources between preventing, detecting, and eradicating island invasions	Rout et al		2011	English	Peer-reviewed article	NA	Yes	Animalia	Chordata	Mammalia	Rodentia	Muridae	Rattus	Rattus rattus		Black rat	Terrestrial	Terrestrial			other		Y	Oceania	Australia		Barrow Island	Unit (235.9 km²)	2010	Year	2010	2010	2010	2010	One-time	500000			515574	374376	500000	515574	374376	AUD	2010
IC_1.0_498	506	WoS	8383	Allocating biosecurity resources between preventing, detecting, and eradicating island invasions	Rout et al		2011	English	Peer-reviewed article	NA	Yes	Animalia	Chordata	Mammalia	Rodentia	Muridae	Rattus	Rattus rattus		Black rat	Terrestrial	Terrestrial			other		Y	Oceania	Australia		Barrow Island	Unit (235.9 km²)	5 to 8 years	Year	2011	2016	2011	2016	Potentially ongoing	2001450000	2900000	4000000000	2.06379e+09	1.49859e+09	2001450000	2.06379e+09	1.49859e+09	AUD	2010
IC_1.0_510	518	WoS	10323	How to prioritize rat management for the benefit of petrels: A case study of the UK, Channel Islands and Isle of Man	Ratcliffe et al		2009	English	Peer-reviewed article	NA	Yes	Animalia	Chordata	Mammalia	Rodentia	Muridae	Rattus	Rattus exulans/Rattus norvegicus/Rattus rattus		Polynesian rat/Black rat/Brown rat	Terrestrial	Terrestrial			other		Y	Europe	United Kingdom		Shiants	Unit (212 Ha)	2006	Year	2006	2006	2006	2006	One-time	93000			208065	162211	93000	208065	162211	GBP	2006
IC_1.0_511	519	WoS	10323	How to prioritize rat management for the benefit of petrels: A case study of the UK, Channel Islands and Isle of Man	Ratcliffe et al		2009	English	Peer-reviewed article	NA	Yes	Animalia	Chordata	Mammalia	Rodentia	Muridae	Rattus	Rattus exulans/Rattus norvegicus/Rattus rattus		Polynesian rat/Black rat/Brown rat	Terrestrial	Terrestrial			other		Y	Europe	United Kingdom		Calf of Man	Unit (260 Ha)	2006	Year	2006	2006	2006	2006	One-time	114000			202909	183438	114000	202909	183438	GBP	2009
IC_1.0_512	520	WoS	10323	How to prioritize rat management for the benefit of petrels: A case study of the UK, Channel Islands and Isle of Man	Ratcliffe et al		2009	English	Peer-reviewed article	NA	Yes	Animalia	Chordata	Mammalia	Rodentia	Muridae	Rattus	Rattus exulans/Rattus norvegicus/Rattus rattus		Polynesian rat/Black rat/Brown rat	Terrestrial	Terrestrial			other		Y	Europe	United Kingdom		Taransay	Unit (1,475 Ha)	2006	Year	2006	2006	2006	2006	One-time	649000			1.15515e+06	1.04431e+06	649000	1.15515e+06	1.04431e+06	GBP	2009
IC_1.0_513	521	WoS	10323	How to prioritize rat management for the benefit of petrels: A case study of the UK, Channel Islands and Isle of Man	Ratcliffe et al		2009	English	Peer-reviewed article	NA	Yes	Animalia	Chordata	Mammalia	Rodentia	Muridae	Rattus	Rattus exulans/Rattus norvegicus/Rattus rattus		Polynesian rat/Black rat/Brown rat	Terrestrial	Terrestrial			other		Y	Europe	United Kingdom		Hellisay⁄Gighay	Unit (238 Ha)	2006	Year	2006	2006	2006	2006	One-time	105000			186889	168956	105000	186889	168956	GBP	2009
IC_1.0_514	522	WoS	10323	How to prioritize rat management for the benefit of petrels: A case study of the UK, Channel Islands and Isle of Man	Ratcliffe et al		2009	English	Peer-reviewed article	NA	Yes	Animalia	Chordata	Mammalia	Rodentia	Muridae	Rattus	Rattus exulans/Rattus norvegicus/Rattus rattus		Polynesian rat/Black rat/Brown rat	Terrestrial	Terrestrial			other		Y	Europe	United Kingdom		Gairsay	Unit (240 Ha)	2006	Year	2006	2006	2006	2006	One-time	106000			188669	170565	106000	188669	170565	GBP	2009
IC_1.0_515	523	WoS	10323	How to prioritize rat management for the benefit of petrels: A case study of the UK, Channel Islands and Isle of Man	Ratcliffe et al		2009	English	Peer-reviewed article	NA	Yes	Animalia	Chordata	Mammalia	Rodentia	Muridae	Rattus	Rattus exulans/Rattus norvegicus/Rattus rattus		Polynesian rat/Black rat/Brown rat	Terrestrial	Terrestrial			other		Y	Europe	United Kingdom		Sandray	Unit (385 Ha)	2006	Year	2006	2006	2006	2006	One-time	169000			300803	271938	169000	300803	271938	GBP	2009
IC_1.0_516	524	WoS	10323	How to prioritize rat management for the benefit of petrels: A case study of the UK, Channel Islands and Isle of Man	Ratcliffe et al		2009	English	Peer-reviewed article	NA	Yes	Animalia	Chordata	Mammalia	Rodentia	Muridae	Rattus	Rattus exulans/Rattus norvegicus/Rattus rattus		Polynesian rat/Black rat/Brown rat	Terrestrial	Terrestrial			other		Y	Europe	United Kingdom		Rum	Unit (10,463 Ha)	2006	Year	2006	2006	2006	2006	One-time	4604000			8.19466e+06	7.40831e+06	4604000	8.19466e+06	7.40831e+06	GBP	2009
IC_1.0_517	525	WoS	10323	How to prioritize rat management for the benefit of petrels: A case study of the UK, Channel Islands and Isle of Man	Ratcliffe et al		2009	English	Peer-reviewed article	NA	Yes	Animalia	Chordata	Mammalia	Rodentia	Muridae	Rattus	Rattus exulans/Rattus norvegicus/Rattus rattus		Polynesian rat/Black rat/Brown rat	Terrestrial	Terrestrial			other		Y	Europe	United Kingdom		Inchcolm	Unit (5 Ha)	2006	Year	2006	2006	2006	2006	One-time	2000			3559.8	3218.21	2000	3559.8	3218.21	GBP	2009
IC_1.0_518	526	WoS	10323	How to prioritize rat management for the benefit of petrels: A case study of the UK, Channel Islands and Isle of Man	Ratcliffe et al		2009	English	Peer-reviewed article	NA	Yes	Animalia	Chordata	Mammalia	Rodentia	Muridae	Rattus	Rattus exulans/Rattus norvegicus/Rattus rattus		Polynesian rat/Black rat/Brown rat	Terrestrial	Terrestrial			other		Y	Europe	United Kingdom		Inchkeith	Unit (20 Ha)	2006	Year	2006	2006	2006	2006	One-time	9000			16019.1	14481.9	9000	16019.1	14481.9	GBP	2009
IC_1.0_519	527	WoS	10323	How to prioritize rat management for the benefit of petrels: A case study of the UK, Channel Islands and Isle of Man	Ratcliffe et al		2009	English	Peer-reviewed article	NA	Yes	Animalia	Chordata	Mammalia	Rodentia	Muridae	Rattus	Rattus exulans/Rattus norvegicus/Rattus rattus		Polynesian rat/Black rat/Brown rat	Terrestrial	Terrestrial			other		Y	Europe	United Kingdom		Caldey Island	Unit (120 Ha)	2006	Year	2006	2006	2006	2006	One-time	53000			94334.7	85282.5	53000	94334.7	85282.5	GBP	2009
IC_1.0_520	528	WoS	10323	How to prioritize rat management for the benefit of petrels: A case study of the UK, Channel Islands and Isle of Man	Ratcliffe et al		2009	English	Peer-reviewed article	NA	Yes	Animalia	Chordata	Mammalia	Rodentia	Muridae	Rattus	Rattus exulans/Rattus norvegicus/Rattus rattus		Polynesian rat/Black rat/Brown rat	Terrestrial	Terrestrial			other		Y	Europe	United Kingdom		Out Skerries	Unit (128 Ha)	2006	Year	2006	2006	2006	2006	One-time	56000			99674.4	90109.8	56000	99674.4	90109.8	GBP	2009
IC_1.0_521	529	WoS	10323	How to prioritize rat management for the benefit of petrels: A case study of the UK, Channel Islands and Isle of Man	Ratcliffe et al		2009	English	Peer-reviewed article	NA	Yes	Animalia	Chordata	Mammalia	Rodentia	Muridae	Rattus	Rattus exulans/Rattus norvegicus/Rattus rattus		Polynesian rat/Black rat/Brown rat	Terrestrial	Terrestrial			other		Y	Europe	United Kingdom		Wyre	Unit (311 Ha)	2006	Year	2006	2006	2006	2006	One-time	137000			243846	220447	137000	243846	220447	GBP	2009
IC_1.0_522	530	WoS	10323	How to prioritize rat management for the benefit of petrels: A case study of the UK, Channel Islands and Isle of Man	Ratcliffe et al		2009	English	Peer-reviewed article	NA	Yes	Animalia	Chordata	Mammalia	Rodentia	Muridae	Rattus	Rattus exulans/Rattus norvegicus/Rattus rattus		Polynesian rat/Black rat/Brown rat	Terrestrial	Terrestrial			other		Y	Europe	United Kingdom		Graemesay	Unit (409 Ha)	2006	Year	2006	2006	2006	2006	One-time	180000			320382	289639	180000	320382	289639	GBP	2009
IC_1.0_523	531	WoS	10323	How to prioritize rat management for the benefit of petrels: A case study of the UK, Channel Islands and Isle of Man	Ratcliffe et al		2009	English	Peer-reviewed article	NA	Yes	Animalia	Chordata	Mammalia	Rodentia	Muridae	Rattus	Rattus exulans/Rattus norvegicus/Rattus rattus		Polynesian rat/Black rat/Brown rat	Terrestrial	Terrestrial			other		Y	Europe	United Kingdom		Rathlin Island	Unit (1,400 Ha)	2006	Year	2006	2006	2006	2006	One-time	616000			1.09642e+06	991207	616000	1.09642e+06	991207	GBP	2009
IC_1.0_524	532	WoS	10323	How to prioritize rat management for the benefit of petrels: A case study of the UK, Channel Islands and Isle of Man	Ratcliffe et al		2009	English	Peer-reviewed article	NA	Yes	Animalia	Chordata	Mammalia	Rodentia	Muridae	Rattus	Rattus exulans/Rattus norvegicus/Rattus rattus		Polynesian rat/Black rat/Brown rat	Terrestrial	Terrestrial			other		Y	Europe	United Kingdom		St Agnes⁄Gugh	Unit (1,480 Ha)	2006	Year	2006	2006	2006	2006	One-time	651000			1.15871e+06	1.04753e+06	651000	1.15871e+06	1.04753e+06	GBP	2009
IC_1.0_525	533	WoS	10323	How to prioritize rat management for the benefit of petrels: A case study of the UK, Channel Islands and Isle of Man	Ratcliffe et al		2009	English	Peer-reviewed article	NA	Yes	Animalia	Chordata	Mammalia	Rodentia	Muridae	Rattus	Rattus exulans/Rattus norvegicus/Rattus rattus		Polynesian rat/Black rat/Brown rat	Terrestrial	Terrestrial			other		Y	Europe	United Kingdom		Eigg	Unit (3,049 Ha)	2006	Year	2006	2006	2006	2006	One-time	1342000			2.38862e+06	2.15942e+06	1342000	2.38862e+06	2.15942e+06	GBP	2009
IC_1.0_526	534	WoS	10323	How to prioritize rat management for the benefit of petrels: A case study of the UK, Channel Islands and Isle of Man	Ratcliffe et al		2009	English	Peer-reviewed article	NA	Yes	Animalia	Chordata	Mammalia	Rodentia	Muridae	Rattus	Rattus exulans/Rattus norvegicus/Rattus rattus		Polynesian rat/Black rat/Brown rat	Terrestrial	Terrestrial			other		Y	Europe	United Kingdom		Herm⁄Jethou	Unit (269 Ha)	2006	Year	2006	2006	2006	2006	One-time	118000			210028	189874	118000	210028	189874	GBP	2009
IC_1.0_527	535	WoS	10323	How to prioritize rat management for the benefit of petrels: A case study of the UK, Channel Islands and Isle of Man	Ratcliffe et al		2009	English	Peer-reviewed article	NA	Yes	Animalia	Chordata	Mammalia	Rodentia	Muridae	Rattus	Rattus exulans/Rattus norvegicus/Rattus rattus		Polynesian rat/Black rat/Brown rat	Terrestrial	Terrestrial			other		Y	Europe	United Kingdom		Egilsay	Unit (650 Ha)	2006	Year	2006	2006	2006	2006	One-time	286000			509051	460203	286000	509051	460203	GBP	2009
IC_1.0_528	536	WoS	10323	How to prioritize rat management for the benefit of petrels: A case study of the UK, Channel Islands and Isle of Man	Ratcliffe et al		2009	English	Peer-reviewed article	NA	Yes	Animalia	Chordata	Mammalia	Rodentia	Muridae	Rattus	Rattus exulans/Rattus norvegicus/Rattus rattus		Polynesian rat/Black rat/Brown rat	Terrestrial	Terrestrial			other		Y	Europe	United Kingdom		Muck	Unit (559 Ha)	2006	Year	2006	2006	2006	2006	One-time	246000			437855	395839	246000	437855	395839	GBP	2009
IC_1.0_538	546	TC	476	Proclaimed animal research in South Australia — cost-benefits, future directions and related issues	Henzell		1989	English	Official report	Williams, K. (1995). Managing vertebrate pests : rabbits., 1–299. Retrieved from https://ezp.lib.unimelb.edu.au/login?url=https://search.ebscohost.com/login.aspx?direct=true&db=cat00006a&AN=melb.b2093380&site=eds-live&scope=site	Yes	Animalia	Chordata	Mammalia	Rodentia	Muridae	Mus	Mus musculus		House mouse	Terrestrial	Terrestrial			both		Y	Oceania	Australia		New South Wales	Site	1989	Year	1989	Unspecified	1989	1989	Potentially ongoing	2400000			3.7526e+06	3.51759e+06	2400000	3.7526e+06	3.51759e+06	AUD	1989
IC_1.0_539	547	TC	476	Proclaimed animal research in South Australia — cost-benefits, future directions and related issues	Henzell		1989	English	Official report	Williams, K. (1995). Managing vertebrate pests : rabbits., 1–299. Retrieved from https://ezp.lib.unimelb.edu.au/login?url=https://search.ebscohost.com/login.aspx?direct=true&db=cat00006a&AN=melb.b2093380&site=eds-live&scope=site	Yes	Animalia	Chordata	Mammalia	Rodentia	Muridae	Mus	Mus musculus		House mouse	Terrestrial	Terrestrial			both		Y	Oceania	Australia		New South Wales	Site	1989	Year	1989	Unspecified	1989	1989	Potentially ongoing	860000			1.34468e+06	1.26047e+06	860000	1.34468e+06	1.26047e+06	AUD	1989
IC_1.0_541	549	WoS	14428	Effectiveness of Rodent Control and Monitoring Techniques for a Montane Rainforest	Nelson et al		2002	English	Peer-reviewed article	NA	Yes	Animalia	Chordata	Mammalia	Rodentia	Muridae	Rattus	Rattus exulans/Rattus rattus		Polynesian rat/Black rat	Terrestrial	Terrestrial			other	Y	Y	Pacific Islands	United States of America	Hawaii	Hawaii (Hakalau Forest)	Unit (Km²)	1999	Year	1999	Unspecified	1999	1999	Potentially ongoing	7000			10300.7	10300.7	7000	10300.7	10300.7	USD	1999
IC_1.0_542	550	TC	380	Invasive rodent eradication on islands	Howald et al		2007	English	Peer-reviewed article	Shiels, A. B., Pitt, W. C., Sugihara, R. T., & Witmer, G. W. (2014). Biology and Impacts of Pacific Island Invasive Species. 11. Rattus rattus, the Black Rat (Rodentia: Muridae). Pacific Science, 68(2), 145–184. https://doi.org/10.2984/68.2.1	Yes	Animalia	Chordata	Mammalia	Rodentia	Muridae	Mus/Rattus	Rattus sp./Mus sp.		Rat/Mouse	Terrestrial	Terrestrial			other		Y	Diverse/Unspecified	Diverse/Unspecified		Islands	Global	Unspecified	Year	Unspecified	Unspecified	2007	2007	One-time	1615200	123	1615200	2.02731e+06		1615200	2.02731e+06		USD	2005
IC_1.0_550	558	TC	528	Statistik om rottebekæmpelse Meddelelse fra Miljøstyrelsens konsulenter i rottebekæmpelse	Danish Environmental Protection Agency		2007	English	Official report	Gren, I.-M., Isacs, L., & Carlsson, M. (2007). Calculation of costs of invasive alien species in Sweden - technical report. Working Paper Series 2007:7.	No	Animalia	Chordata	Mammalia	Rodentia	Muridae	Mus	Mus musculus		House mouse /Brown Rat	Terrestrial	Terrestrial			other			Europe	Denmark		271 municipalities	Site	1990s	Year	1990	1999	1990	1999	One-time	60000000	58000000	62000000	1.2268e+07	7.01123e+06	60000000	1.2268e+07	7.01123e+06	DKK	2006
IC_1.0_551	559	GS	44	Calculation of costs of alien invasive species in Sweden – technical report. SLU, Institutionen för ekonomi, Uppsala, Sweden.	Gren et al		2007	English	Official report	NA	Yes	Animalia	Chordata	Mammalia	Rodentia	Muridae	Mus/Rattus	Mus musculus/Rattus norvegicus		House mouse/Brown Rat	Terrestrial	Terrestrial			both			Europe	Sweden		Diverse/Unspecified	Country	2007	Year	2007	Unspecified	2007	2007	Potentially ongoing	126000000	117000000	135000000	2.2039e+07	1.67687e+07	126000000	2.2039e+07	1.67687e+07	SEK	2007
IC_1.0_552	560	TC	222	Consultant. Miljøstyrelsens rottebekæmpelse. Danish Ministry of the Environment	Weile		2007	English	Official report	Gren, I.-M., Isacs, L., & Carlsson, M. (2007). Calculation of costs of invasive alien species in Sweden - technical report. Working Paper Series 2007:7.	No	Animalia	Chordata	Mammalia	Rodentia	Muridae	Rattus	Rattus norvegicus		Brown rat	Terrestrial	Terrestrial			other			Europe	Denmark		Diverse/Unspecified	Country	2002	Year	2002	Unspecified	2002	2002	Potentially ongoing	150000000	100000000	200000000	3.25752e+07	1.58551e+07	150000000	3.25752e+07	1.58551e+07	DKK	2007
IC_1.0_553	561	GS	44	Calculation of costs of alien invasive species in Sweden – technical report. SLU, Institutionen för ekonomi, Uppsala, Sweden.	Gren et al		2007	English	Official report	NA	Yes	Animalia	Chordata	Mammalia	Rodentia	Muridae	Mus/Rattus	Mus musculus/Rattus norvegicus		House mouse/Brown Rat	Terrestrial	Terrestrial			both			Europe	Sweden		Diverse/Unspecified	Country	2007	Year	2007	Unspecified	2007	2007	Potentially ongoing	313500000	209000000	418000000	5.48352e+07	4.17221e+07	313500000	5.48352e+07	4.17221e+07	SEK	2007
IC_1.0_559	567	Go	93	The economic cost of invasive non-native species on Great Britain	Williams et al.		2010	English	Official report	Williams, F., Eschen, R., Harris, A., Djeddour, D., Pratt, C., Shaw, R., … Murphy, S. (2010). The economic cost of invasive non-native species on Great Britain. CABI Publishing, (November), 199 pp. --> Williams, F., Eschen, R., Harris, A., Djeddour, D., Pratt, C., Shaw, R., … Murphy, S. (2010). The economic cost of invasive non-native species on Great Britain. CABI Publishing, (November), 199 pp.	No	Animalia	Chordata	Mammalia	Rodentia	Muridae	Rattus	Rattus norvegicus		Brown rat	Terrestrial	Terrestrial			other		Y	Europe	United Kingdom		England/Wales/Scotland	Country	2010	Year	2010	Unspecified	2010	2010	Potentially ongoing	21830000			3.79175e+07	3.49757e+07	21830000	3.79175e+07	3.49757e+07	GBP	2010
IC_1.0_565	576	Go	93	The economic cost of invasive non-native species on Great Britain	Williams et al		2010	English	Official report	NA	Yes	Animalia	Chordata	Mammalia	Rodentia	Sciuridae	Sciurus	Sciurus carolinensis		Grey squirrel	Terrestrial	Terrestrial			other		Y	Europe	United Kingdom		Diverse/Unspecified	Country	2010	Year	2010	Unspecified	2010	2010	Potentially ongoing	684802			1.18946e+06	1.09718e+06	684802	1.18946e+06	1.09718e+06	GBP	2010
IC_1.0_566	577	Go	93	The economic cost of invasive non-native species on Great Britain	Williams et al		2010	English	Official report	NA	Yes	Animalia	Chordata	Mammalia	Rodentia	Sciuridae	Sciurus	Sciurus carolinensis		Grey squirrel	Terrestrial	Terrestrial			other		Y	Europe	United Kingdom		Diverse/Unspecified	Country	2010	Year	2010	Unspecified	2010	2010	Potentially ongoing	5412518			9.40125e+06	8.67184e+06	5412518	9.40125e+06	8.67184e+06	GBP	2010
IC_1.0_567	578	Go	93	The economic cost of invasive non-native species on Great Britain	Williams et al		2010	English	Official report	NA	Yes	Animalia	Chordata	Mammalia	Rodentia	Sciuridae	Sciurus	Sciurus carolinensis		Grey squirrel	Terrestrial	Terrestrial			other		Y	Europe	United Kingdom		Diverse/Unspecified	Country	2010	Year	2010	Unspecified	2010	2010	Potentially ongoing	53225850	110000	106341700	9.24504e+07	8.52775e+07	53225850	9.24504e+07	8.52775e+07	GBP	2010
IC_1.0_568	579	Go	93	The economic cost of invasive non-native species on Great Britain	Williams et al		2010	English	Official report	NA	Yes	Animalia	Chordata	Mammalia	Rodentia	Myocastoridae	Myocastor	Myocastor coypus		Nutria	Semi-aquatic	Semi-aquatic			other		Y	Europe	United Kingdom		Diverse/Unspecified	Country	2010	Year	2010	Unspecified	2010	2010	Potentially ongoing	11750000	4700000	18800000	2.04091e+07	1.88256e+07	11750000	2.04091e+07	1.88256e+07	GBP	2010
IC_1.0_570	581	TC	318	Extinction to order	Gosling		1989	English	Book chapter	Genovesi, P. (2000). Guidelines for eradication of terrestrial vertebrates: a European contribution to the invasive. Other Publications in Wildlife Management, 24(February), 242–248. Retrieved from http://scholar.google.com/scholar?q=intitle:Guidelines+for+eradication+of+terrestrial+vertebrates:+a+European+contribution+to+the+invasive#0	Yes	Animalia	Chordata	Mammalia	Rodentia	Myocastoridae	Myocastor	Myocastor coypus		Nutria	Semi-aquatic	Semi-aquatic			other		Y	Europe	United Kingdom	England	Diverse/Unspecified	Country	1981-1989	Period	1981	1989	1981	1989	One-time	2500000			1.72815e+07	1.47745e+07	277778	1.92016e+06	1.64162e+06	GBP	1980
IC_1.0_574	585	WoS	4498	The potential for biodiversity offsetting to fund effective invasive species control	Norton and Warburton		2015	English	Peer-reviewed article	NA	Yes	Animalia	Chordata	Mammalia	Rodentia	Muridae	Rattus	Rattus rattus		Black rat	Terrestrial	Terrestrial			other		Y	Oceania	New Zealand		NA	Unit (Ha)	2015	Year	2015	Unspecified	2015	2015	Potentially ongoing	17			17.5812	17.2244	17	17.5812	17.2244	USD	2015
IC_1.0_575	586	GS	307	Invasive alien species: a toolkit of best prevention and management practices	Wittenberg and Cock		2001	English	Book	NA	Yes	Animalia	Chordata	Mammalia	Rodentia	Muridae	Rattus	Rattus norvegicus/Rattus rattus		Brown rat/Black rat	Terrestrial	Terrestrial			other		Y	Africa	Seychelles		Some islands	Site	May-August 2000	Year	2000	2000	2000	2000	One-time	250000			355865	686787	250000	355865	686787	USD	2000
IC_1.0_578	589	GS	308	Invasive alien species: The urban dimension	van Ham et al		2013	English	Book	NA	Yes	Animalia	Chordata	Mammalia	Rodentia	Sciuridae	Sciurus	Sciurus carolinensis		Grey squirrel	Terrestrial	Terrestrial			urban			Europe	Italy		Umbria	Site	2010	Year	2010	Unspecified	2010	2010	Potentially ongoing	15000			22332.1	16482.1	15000	22332.1	16482.1	EUR	2010
IC_1.0_590	601	GS	223	Plant, Animal, and Microbe Invasive Species in the United States and World	Pimentel et al		2007	English	Book chapter	NA	No	Animalia	Chordata	Mammalia	Rodentia	Muridae	Rattus	Rattus sp.		Rat	Terrestrial	Terrestrial			other			North America	United States of America		Diverse/Unspecified	Country	2007	Year	2007	Unspecified	2007	2007	Potentially ongoing	30000000000			3.63526e+10	3.63526e+10	30750000000	3.63526e+10	3.63526e+10	USD	2007
IC_1.0_593	604	TC	429	Mouse Plague Threat Continues to Build	Grains Research and Development Corporation		1993	English	Official report	Emmerson, G., & Mcculloch, J. (1994). FERAL PERIL: Queensland’s Introduced Plants and Animals, (28).	No	Animalia	Chordata	Mammalia	Rodentia	Muridae	Mus	Mus musculus		House mouse	Terrestrial	Terrestrial			other		Y	Oceania	Australia		Diverse/Unspecified	Country	1993	Year	1993	Unspecified	1993	1993	Potentially ongoing	100000000	50000000	100000000	1.15386e+08	1.29285e+08	100000000	1.15386e+08	1.29285e+08	AUD	1993
IC_1.0_594	606	TC	291	Environmental valuation and the Hawaiian economy	Kaiser et al		1999	English	Official report	IKUMA, E. K., SUGANO, D., & MARDFIN, J. K. (2002). Filling the Gaps in the Fight Against Invasive Species. Honolulu, Hawaii.	Yes	Animalia	Chordata	Mammalia	Rodentia	Muridae	Rattus	Rattus sp.		Rat	Terrestrial	Terrestrial			other		Y	Pacific Islands	United States of America	Hawaii	Hawaii	Site	Early 1990s	Year	1990	Unspecified	1990	1990	Potentially ongoing	8000000	6000000	10000000	1.50083e+07	1.50083e+07	8000000	1.50083e+07	1.50083e+07	USD	1990
IC_1.0_595	607	TC	291	Environmental valuation and the Hawaiian economy	Kaiser et al		1999	English	Official report	IKUMA, E. K., SUGANO, D., & MARDFIN, J. K. (2002). Filling the Gaps in the Fight Against Invasive Species. Honolulu, Hawaii.	Yes	Animalia	Chordata	Mammalia	Rodentia	Muridae	Rattus	Rattus sp.		Rat	Terrestrial	Terrestrial			other		Y	Pacific Islands	United States of America	Hawaii	Hawaii	Site	1995	Year	1995	1995	1995	1995	Potentially ongoing	2700000	1800000	3600000	4.34314e+06	4.34314e+06	2700000	4.34314e+06	4.34314e+06	USD	1995
IC_1.0_605	617	Go	41	Economic Impact of the Spread of Alien Species in Germany	Reinhardt et al		2003	English	Official report	NA	Yes	Animalia	Chordata	Mammalia	Rodentia	Cricetidae	Ondatra	Ondatra zibethicus		Muskrat	Terrestrial	Semi-aquatic			urban			Europe	Germany		Diverse/Unspecified	Country	2003	Year	2003	Unspecified	2003	2003	Potentially ongoing	4600000	71000	9100000	6.91777e+06	6.0545e+06	4600000	6.91777e+06	6.0545e+06	EUR	2003
IC_1.0_606	619	Go	41	Economic Impact of the Spread of Alien Species in Germany	Reinhardt et al		2003	English	Official report	NA	Yes	Animalia	Chordata	Mammalia	Rodentia	Cricetidae	Ondatra	Ondatra zibethicus		Muskrat	Terrestrial	Semi-aquatic			urban			Europe	Germany		Diverse/Unspecified	Country	2003	Year	2003	Unspecified	2003	2003	Potentially ongoing	3900000	3000000	5200000	5.86506e+06	5.13316e+06	3900000	5.86506e+06	5.13316e+06	EUR	2003
IC_1.0_617	630	WoS	6512	Economic and Environmental Impacts of Harmful Non-Indigenous Species in Southeast Asia	Nghiem et al		2013	English	Peer-reviewed article	NA	Yes	Animalia	Chordata	Mammalia	Rodentia	Muridae	Mus/Rattus	Mus musculus/Rattus norvegicus		House mouse/Brown Rat	Terrestrial	Terrestrial			other			Asia	Malaysia/Myanmar/Thailand		Diverse/Unspecified	Regional	2011	Year	2011	Unspecified	2011	2011	Potentially ongoing	1880000000			2.04866e+09		1880000000	2.04866e+09		USD	2011
IC_1.0_641	663	TC	207	Biological globalisation – Bio-invasions and their impacts on nature, the economy and public health	Wijden et al		2007	English	Official report	Kettunen, M., Genovesi, P., Gollasch, S., Pagad, S., Starfinger, U., ten Brink, P., & Shine, C. (2009). Technical support to EU strategy on invasive alien species (IAS) - Assessment of the impacts of IAS in Europe and the EU. Institute for European Environmental Policy, (070307), 44. Retrieved from http://scholar.google.com/scholarUnknownhl=en&btnG=Search&q=intitle:TECHNICAL+SUPPORT+TO+EU+STRATEG…	No	Animalia	Chordata	Mammalia	Rodentia	Myocastoridae	Myocastor	Myocastor coypus		Nutria	Semi-aquatic	Semi-aquatic			other			Europe	Netherlands		Diverse/Unspecified	Country	2007	Year	2007	Unspecified	2007	2007	Potentially ongoing	800000			1.29443e+06	802394	800000	1.29443e+06	802394	EUR	2007
IC_1.0_642	667	TC	200	Audit of responsibilities for non-native species within government departments, non-departmental public bodies, agencies, and local government in England, Scotland and Wales. Available online at: http://www.nonnativespecies.or g/documents/JPP1294%20Defr a%20Audit%20Final.pdf	RPS ECOLOGY		2007	English	Official report	Kettunen, M., Genovesi, P., Gollasch, S., Pagad, S., Starfinger, U., ten Brink, P., & Shine, C. (2009). Technical support to EU strategy on invasive alien species (IAS) - Assessment of the impacts of IAS in Europe and the EU. Institute for European Environmental Policy, (070307), 44. Retrieved from http://scholar.google.com/scholarUnknownhl=en&btnG=Search&q=intitle:TECHNICAL+SUPPORT+TO+EU+STRATEG…	No	Animalia	Chordata	Mammalia	Rodentia	Myocastoridae	Myocastor	Myocastor coypus		Nutria	Semi-aquatic	Semi-aquatic			other		Y	Europe	United Kingdom		Diverse/Unspecified	Country	2007	Year	2007	2007	2007	2007	One-time	3400000			8.04261e+06	5.66085e+06	3400000	8.04261e+06	5.66085e+06	GBP	2007
IC_1.0_643	669	TC	54	Technical support to EU strategy on invasive alien species (IAS) - Assessment of the impacts of IAS in Europe and the EU	Kettunen et al		2009	English	Official report	NA	Yes	Animalia	Chordata	Mammalia	Rodentia	Cricetidae	Ondatra	Ondatra zibethicus		Muskrat	Terrestrial	Semi-aquatic			other		Y	Europe	United Kingdom		Diverse/Unspecified	Country	5 years (1930s)	Period	1930	1935	1930	1935	One-time	2000000			3.5598e+06	3.21821e+06	400000	711960	643641	GBP	2009
IC_1.0_646	672	TC	54	Technical support to EU strategy on invasive alien species (IAS) - Assessment of the impacts of IAS in Europe and the EU	Kettunen et al		2009	English	Official report	NA	Yes	Animalia	Chordata	Mammalia	Rodentia	Muridae	Rattus	Rattus norvegicus		Brown rat	Terrestrial	Terrestrial			other		Y	Europe	Malta		Diverse/Unspecified	Country	2 years	Period	2007	2009	2007	2009	One-time	280000			446211	561903	93333.3	148737	187301	EUR	2009
IC_1.0_647	673	TC	525	State of the art review of the environmental and economic risks posed by invasive alien species in Europe - DAISIE Deliverable 14 Report	Scalera and Zaghi		2004	English	Official report	Kettunen, M., Genovesi, P., Gollasch, S., Pagad, S., Starfinger, U., ten Brink, P., & Shine, C. (2009). Technical support to EU strategy on invasive alien species (IAS) - Assessment of the impacts of IAS in Europe and the EU. Institute for European Environmental Policy, (070307), 44. Retrieved from http://scholar.google.com/scholar?hl=en&btnG=Search&q=intitle:TECHNICAL+SUPPORT+TO+EU+STRATEGY+ON+I…	No	Animalia	Chordata	Mammalia	Rodentia	Muridae	Rattus	Rattus norvegicus		Brown rat	Terrestrial	Terrestrial			other			Europe	Diverse/Unspecified		NA	Unit (2,500 km2)	2003	Year	2003	Unspecified	2003	2003	Potentially ongoing	4990			8055.1		4990	8055.1		EUR	2004
IC_1.0_648	674	TC	54	Technical support to EU strategy on invasive alien species (IAS) - Assessment of the impacts of IAS in Europe and the EU	Kettunen et al		2009	English	Official report	NA	Yes	Animalia	Chordata	Mammalia	Rodentia	Muridae	Rattus	Rattus sp.		Rat	Terrestrial	Terrestrial			other			Europe	Diverse/Unspecified		Diverse/Unspecified	Continental	2008	Year	2008	2008	2008	2008	One-time	200000			317444		200000	317444		EUR	2009
IC_1.0_650	677	WoS	14739	Economic and environmental threats of alien plant, animal, and microbe invasions	Pimentel et al		2001	English	Peer-reviewed article	none	Yes	Animalia	Chordata	Mammalia	Rodentia	Muridae	Rattus	Rattus sp.		Rats	Terrestrial	Terrestrial			other	NA	N	Asia	India		Diverse/Unspecified	Country	2001	Year	2001	Unspecified	2001	2001	Potentially ongoing	25000000000			3.46084e+10	1.59617e+11		3.46084e+10	1.59617e+11	USD	2001
IC_1.0_651	678	TC	54	Technical support to EU strategy on invasive alien species (IAS) - Assessment of the impacts of IAS in Europe and the EU	Kettunen et al		2009	English	Official report	NA	Yes	Animalia	Chordata	Mammalia	Rodentia	Muridae	Rattus	Rattus sp.		Rat	Terrestrial	Terrestrial			other			Europe	Diverse/Unspecified		Diverse/Unspecified	Continental	2004	Year	2004	Unspecified	2004	2004	Potentially ongoing	4100000000			6.50761e+09		4100000000	6.50761e+09		EUR	2009
IC_1.0_655	684	TC	207	Biological globalisation – Bio-invasions and their impacts on nature, the economy and public health	Wijden et al		2007	English	Official report	Kettunen, M., Genovesi, P., Gollasch, S., Pagad, S., Starfinger, U., ten Brink, P., & Shine, C. (2009). Technical support to EU strategy on invasive alien species (IAS) - Assessment of the impacts of IAS in Europe and the EU. Institute for European Environmental Policy, (070307), 44. Retrieved from http://scholar.google.com/scholarUnknownhl=en&btnG=Search&q=intitle:TECHNICAL+SUPPORT+TO+EU+STRATEG…	No	Animalia	Chordata	Mammalia	Rodentia	Cricetidae	Ondatra	Ondatra zibethicus		Muskrat	Terrestrial	Semi-aquatic			other			Europe	Germany		Diverse/Unspecified	Country	2007	Year	2007	Unspecified	2007	2007	Potentially ongoing	23000000			3.72148e+07	2.36997e+07	23000000	3.72148e+07	2.36997e+07	EUR	2007
IC_1.0_656	685	TC	449	Ondatra zibethicus. Species factsheet	DAISIE		2007	English	Official report	Kettunen, M., Genovesi, P., Gollasch, S., Pagad, S., Starfinger, U., ten Brink, P., & Shine, C. (2009). Technical support to EU strategy on invasive alien species (IAS) - Assessment of the impacts of IAS in Europe and the EU. Brussels, Belgium.	Yes	Animalia	Chordata	Mammalia	Rodentia	Cricetidae	Ondatra	Ondatra zibethicus		Muskrat	Terrestrial	Semi-aquatic			other			Europe	Germany		Diverse/Unspecified	Country	2006	Year	2006	Unspecified	2006	2006	Potentially ongoing	12400000			2.00636e+07	1.27772e+07	12400000	2.00636e+07	1.27772e+07	EUR	2007
IC_1.0_657	686	TC	449	Ondatra zibethicus. Species factsheet	DAISIE		2007	English	Official report	Kettunen, M., Genovesi, P., Gollasch, S., Pagad, S., Starfinger, U., ten Brink, P., & Shine, C. (2009). Technical support to EU strategy on invasive alien species (IAS) - Assessment of the impacts of IAS in Europe and the EU. Brussels, Belgium.	Yes	Animalia	Chordata	Mammalia	Rodentia	Cricetidae	Ondatra	Ondatra zibethicus		Muskrat	Terrestrial	Semi-aquatic			other			Europe	Germany		Diverse/Unspecified	Country	2006	Year	2006	Unspecified	2006	2006	Potentially ongoing	3000000			4.8541e+06	3.09126e+06	3000000	4.8541e+06	3.09126e+06	EUR	2007
IC_1.0_658	687	TC	525	State of the art review of the environmental and economic risks posed by invasive alien species in Europe - DAISIE Deliverable 14 Report	White and Harris		2002	English	Official report	Kettunen, M., Genovesi, P., Gollasch, S., Pagad, S., Starfinger, U., ten Brink, P., & Shine, C. (2009). Technical support to EU strategy on invasive alien species (IAS) - Assessment of the impacts of IAS in Europe and the EU. Institute for European Environmental Policy, (070307), 44. Retrieved from http://scholar.google.com/scholar?hl=en&btnG=Search&q=intitle:TECHNICAL+SUPPORT+TO+EU+STRATEGY+ON+I…	No	Animalia	Chordata	Mammalia	Rodentia	Sciuridae	Sciurus	Sciurus carolinensis		Grey squirrel	Terrestrial	Terrestrial			other			Europe	Diverse/Unspecified		Diverse/Unspecified	Continental	2002	Year	2002	Unspecified	2002	2002	Potentially ongoing	460000			589950		460000	589950		EUR	2002
IC_1.0_1773	1995	TC	346	Harmful Non-Indigenous Species in the United States	U.S. Congress, Office of Technology Assessment		1993	English	Official report	NA	Yes	Animalia	Chordata	Mammalia	Rodentia	Muridae	Rattus	Rattus sp.		Rats	Terrestrial	Terrestrial			other		Y	Pacific Islands	United States of America	Hawaii	Hawaii	Site	1 year (1986-1987)	Year	1987	1987	1987	1987	One-time	104400			177148	177148	104400	177148	177148	USD	1993
IC_1.0_1774	1996	TC	346	Harmful Non-Indigenous Species in the United States	U.S. Congress, Office of Technology Assessment		1993	English	Official report	NA	Yes	Animalia	Chordata	Mammalia	Rodentia	Muridae	Rattus	Rattus sp.		Rats	Terrestrial	Terrestrial			other		Y	Pacific Islands	United States of America	Hawaii	Hawaii	Site	1 year (1988-1989)	Year	1989	1989	1989	1989	One-time	281000			476806	476806	281000	476806	476806	USD	1993
IC_1.0_1775	1997	TC	346	Harmful Non-Indigenous Species in the United States	U.S. Congress, Office of Technology Assessment		1993	English	Official report	NA	Yes	Animalia	Chordata	Mammalia	Rodentia	Muridae	Rattus	Rattus sp.		Rats	Terrestrial	Terrestrial			other		Y	Pacific Islands	United States of America	Hawaii	Hawaii	Site	1 year (1991-1992)	Year	1992	1992	1992	1992	One-time	232500			394510	394510	232500	394510	394510	USD	1993
IC_1.0_1829	2056	Go	91	The Ecological and socio-economic impacts of invasive alien species on inland water ecosytems	Ciruna, K.A., Meyerson, L.A. & Gutierrez, A.		2004	English	Official report	NA	Yes	Animalia	Chordata	Mammalia	Rodentia	Myocastoridae	Myocastor	Myocastor coypus		Coypu	Aquatic/Terrestrial	Semi-aquatic			other			Europe	Italy		Italy	Country	Unspecified	Year	Unspecified	Unspecified	2005	2005	Potentially ongoing	278000			360769	423120	278000	360769	423120	USD	2004
IC_2.1_2982	NE2990	TC	CL1	Valoracion economica del impacto de siete especies exoticas invasoras sobre los sectores productivos y la biodiversidad en chile	Cerda, C., Skewes, O., Cruz, G., Tapia, P., Araos,A., Baeriswyl, F., Critician, P.		2016	Spanish	Report	NA	Yes	Animalia	Chordata	Mammalia	Rodentia	Castoridae	Castor	Castor canadensis		North American beaver	Aquatic/Terrestrial	Semi-aquatic			other	NA	N	South America	Chile		Chile	Country	until 2016	Period	Unspecified	2016		2016	One-time	1758938			1.79641e+06					USD	2016
IC_2.1_2983	NE2991	TC	CL1	Valoracion economica del impacto de siete especies exoticas invasoras sobre los sectores productivos y la biodiversidad en chile	Cerda, C., Skewes, O., Cruz, G., Tapia, P., Araos,A., Baeriswyl, F., Critician, P.		2016	Spanish	Report	NA	Yes	Animalia	Chordata	Mammalia	Rodentia	Castoridae	Castor	Castor canadensis		North American beaver	Aquatic/Terrestrial	Semi-aquatic			other	NA	N	South America	Chile		Chile	Country	until 2016	Period	Unspecified	2016		2016	One-time	62780722			6.4118e+07					USD	2016
IC_2.1_2984	NE2992	TC	CL1	Valoracion economica del impacto de siete especies exoticas invasoras sobre los sectores productivos y la biodiversidad en chile	Cerda, C., Skewes, O., Cruz, G., Tapia, P., Araos,A., Baeriswyl, F., Critician, P.		2016	Spanish	Report	NA	Yes	Animalia	Chordata	Mammalia	Rodentia	Castoridae	Castor	Castor canadensis		North American beaver	Aquatic/Terrestrial	Semi-aquatic			other	NA	N	South America	Chile		Chile	Country	2016	Year	2016	2016	2016	2016	One-time	96187			98235.9		96187	98235.9		USD	2016
IC_2.1_2985	NE2993	TC	CL1	Valoracion economica del impacto de siete especies exoticas invasoras sobre los sectores productivos y la biodiversidad en chile	Cerda, C., Skewes, O., Cruz, G., Tapia, P., Araos,A., Baeriswyl, F., Critician, P.		2016	Spanish	Report	NA	Yes	Animalia	Chordata	Mammalia	Rodentia	Castoridae	Castor	Castor canadensis		North American beaver	Aquatic/Terrestrial	Semi-aquatic			other	NA	N	South America	Chile		Chile	Country	2016	Year	2016	2016	2016	2016	One-time	9701			9907.64		9701	9907.64		USD	2016
IC_2.1_2986	NE2994	TC	CL1	Valoracion economica del impacto de siete especies exoticas invasoras sobre los sectores productivos y la biodiversidad en chile	Cerda, C., Skewes, O., Cruz, G., Tapia, P., Araos,A., Baeriswyl, F., Critician, P.		2016	Spanish	Report	NA	Yes	Animalia	Chordata	Mammalia	Rodentia	Castoridae	Castor	Castor canadensis		North American beaver	Aquatic/Terrestrial	Semi-aquatic			other	NA	N	South America	Chile		Chile	Country	2016	Year	2016	2016	2016	2016	One-time	101053			103206		101053	103206		USD	2016
IC_2.1_3019	NE3027	TC	AR2	La dura caza del castor invasor en el fin del mundo	Cue, C.E.		2018	Spanish	Newspaper	NA	Yes	Animalia	Chordata	Mammalia	Rodentia	Castoridae	Castor	Castor canadensis		North American beaver	Aquatic/Terrestrial	Semi-aquatic			other	Y	Y	South America	Argentina		Tierra del Fuego	Site	2016-2018	Period	Unspecified	2018	2016	2018	One-time	1300000			1.269e+06		433333	423001		USD	2018
IC_2.1_3020	NE3028	TC	AR2	La dura caza del castor invasor en el fin del mundo	Cue, C.E.		2018	Spanish	Newspaper	NA	Yes	Animalia	Chordata	Mammalia	Rodentia	Castoridae	Castor	Castor canadensis		North American beaver	Aquatic/Terrestrial	Semi-aquatic			other	Y	Y	South America	Argentina		Tierra del Fuego	Site	2016-2018	Year	Unspecified	Unspecified	2016	2018	One-time	66000000			6.44263e+07		22000000	2.14754e+07		USD	2018
IC_2.1_3059	NE3067	Go	AR3	Estudio de factibilidad de erradicar el castor americano (Castor canadensis) en la Patagonia	ParkesJ.P., Paulson J., Donlan C.J., Campbell K		2008	Spanish	Report	NA	Yes	Animalia	Chordata	Mammalia	Rodentia	Castoridae	Castor	Castor canadensis		North American beaver	Aquatic/Terrestrial	Semi-aquatic			other	Y	Y	South America	Argentina		Tierra del Fuego	Site	2008	Year	Unspecified	Unspecified	2008	2008	One-time	32631000			3.715e+07		32631000	3.715e+07		USD	2008
IC_2.1_3222	NE3230	Gs	GISP1	Programa Mundial sobre Especies Invasoras	Sue Matthews		2005	Spanish	Report	NA	Yes	Animalia	Chordata	Mammalia	Rodentia	Muridae	Rattus	Rattus rattus		black rat	Terrestrial	Terrestrial			other	NA	N	North America	United States of America		United States	Country	Unspecified	Year	Unspecified	Unspecified	2005	2005	One-time	19000000000			2.38478e+10	2.38478e+10	19000000000	2.38478e+10	2.38478e+10	USD	2005
IC_2.1_3238	NE3246	TC	AR7	Informe Individual sobre costos relacionados con la invasion de Castor (castor Canadensis) en Argentina.	FAO; FMAM; Estrategia Nacional sobre Especies Invasoras;Ministerio de Medio Ambiente y Desarrollo Sostenible		2017	Spanish	Report	NA	No	Animalia	Chordata	Mammalia	Rodentia	Castoridae	Castor	Castor canadensis		North American beaver	Aquatic	Semi-aquatic			other	NA	Y	South America	Argentina		Tierra del Fuego	Site	2016	Year	2016	2016	2016	2016	One-time	3028500			3028500		3028500	3028500		USD	2017
IC_2.1_3239	NE3247	TC	AR7	Informe Individual sobre costos relacionados con la invasion de Castor (castor Canadensis) en Argentina.	FAO; FMAM; Estrategia Nacional sobre Especies Invasoras;Ministerio de Medio Ambiente y Desarrollo Sostenible		2017	Spanish	Report	NA	No	Animalia	Chordata	Mammalia	Rodentia	Castoridae	Castor	Castor canadensis		North American beaver	Aquatic	Semi-aquatic			other	NA	Y	South America	Argentina		Tierra del Fuego	Site	2016	Year	2016	2016	2016	2016	One-time	30582970			30582970		30582970	30582970		USD	2017
IC_2.1_3240	NE3248	TC	AR7	Informe Individual sobre costos relacionados con la invasion de Castor (castor Canadensis) en Argentina.	FAO; FMAM; Estrategia Nacional sobre Especies Invasoras;Ministerio de Medio Ambiente y Desarrollo Sostenible		2017	Spanish	Report	NA	No	Animalia	Chordata	Mammalia	Rodentia	Castoridae	Castor	Castor canadensis		North American beaver	Aquatic	Semi-aquatic			other	NA	Y	South America	Argentina		Tierra del Fuego	Site	2016	Year	2016	2016	2016	2016	One-time	76012			76012		76012	76012		USD	2017
IC_2.1_3241	NE3249	TC	AR7	Informe Individual sobre costos relacionados con la invasion de Castor (castor Canadensis) en Argentina.	FAO; FMAM; Estrategia Nacional sobre Especies Invasoras;Ministerio de Medio Ambiente y Desarrollo Sostenible		2017	Spanish	Report	NA	No	Animalia	Chordata	Mammalia	Rodentia	Castoridae	Castor	Castor canadensis		North American beaver	Aquatic	Semi-aquatic			other	NA	Y	South America	Argentina		Tierra del Fuego	Site	2016	Year	2016	2016	2016	2016	One-time	165976			165976		165976	165976		USD	2017
IC_2.1_3242	NE3250	TC	AR7	Informe Individual sobre costos relacionados con la invasion de Castor (castor Canadensis) en Argentina.	FAO; FMAM; Estrategia Nacional sobre Especies Invasoras;Ministerio de Medio Ambiente y Desarrollo Sostenible		2017	Spanish	Report	NA	No	Animalia	Chordata	Mammalia	Rodentia	Castoridae	Castor	Castor canadensis		North American beaver	Aquatic	Semi-aquatic			other	NA	Y	South America	Argentina		Tierra del Fuego	Site	2016	Year	2016	2016	2016	2016	One-time	51946			51946		51946	51946		USD	2017
IC_2.1_3243	NE3251	TC	AR7	Informe Individual sobre costos relacionados con la invasion de Castor (castor Canadensis) en Argentina.	FAO; FMAM; Estrategia Nacional sobre Especies Invasoras;Ministerio de Medio Ambiente y Desarrollo Sostenible		2017	Spanish	Report	NA	No	Animalia	Chordata	Mammalia	Rodentia	Castoridae	Castor	Castor canadensis		North American beaver	Aquatic	Semi-aquatic			other	NA	Y	South America	Argentina		Tierra del Fuego	Site	2016	Year	2016	2016	2016	2016	One-time	11982			11982		11982	11982		USD	2017
IC_2.1_3244	NE3252	TC	AR7	Informe Individual sobre costos relacionados con la invasion de Castor (castor Canadensis) en Argentina.	FAO; FMAM; Estrategia Nacional sobre Especies Invasoras;Ministerio de Medio Ambiente y Desarrollo Sostenible		2017	Spanish	Report	NA	No	Animalia	Chordata	Mammalia	Rodentia	Castoridae	Castor	Castor canadensis		North American beaver	Aquatic	Semi-aquatic			other	NA	Y	South America	Argentina		Tierra del Fuego	Site	2016	Year	2016	2016	2016	2016	One-time	31334375			31334375		31334375	31334375		USD	2017
IC_2.1_3245	NE3253	TC	AR7	Informe Individual sobre costos relacionados con la invasion de Castor (castor Canadensis) en Argentina.	FAO; FMAM; Estrategia Nacional sobre Especies Invasoras;Ministerio de Medio Ambiente y Desarrollo Sostenible		2017	Spanish	Report	NA	No	Animalia	Chordata	Mammalia	Rodentia	Castoridae	Castor	Castor canadensis		North American beaver	Aquatic	Semi-aquatic			other	NA	Y	South America	Argentina		Tierra del Fuego	Site	2016	Year	2016	2016	2016	2016	One-time	196126			196126		196126	196126		USD	2017
IC_2.1_3246	NE3254	TC	AR7	Informe Individual sobre costos relacionados con la invasion de Castor (castor Canadensis) en Argentina.	FAO; FMAM; Estrategia Nacional sobre Especies Invasoras;Ministerio de Medio Ambiente y Desarrollo Sostenible		2017	Spanish	Report	NA	No	Animalia	Chordata	Mammalia	Rodentia	Castoridae	Castor	Castor canadensis		North American beaver	Aquatic	Semi-aquatic			other	NA	Y	South America	Argentina		Tierra del Fuego	Site	2016	Year	2016	2016	2016	2016	One-time	1109086			1109086		1109086	1109086		USD	2017
IC_2.1_3455	NE3467	TC	FR33	Analyse économique des espèces exotiques envahissantes en France, Première enquête nationale (2009-2013)	Annelaure Wittmann, Aheli FLores-Ferrer		2015	French	Unpublished material	NA	Yes	Animalia	Chordata	Mammalia	Rodentia	Sciuridae	Callosciurus	Callosciurus erythraeus		Pallas'e Squirrel	Terrestrial	Terrestrial			other	N	N	Europe	France		PACA	Site	2009	Year	2009	2009	2009	2009	One-time	100000			159361	132425	100000	159361	132425	EUR	2009
IC_2.1_3456	NE3468	TC	FR33	Analyse économique des espèces exotiques envahissantes en France, Première enquête nationale (2009-2013)	Annelaure Wittmann, Aheli FLores-Ferrer		2015	French	Unpublished material	NA	Yes	Animalia	Chordata	Mammalia	Rodentia	Sciuridae	Callosciurus	Callosciurus erythraeus		Pallas'e Squirrel	Terrestrial	Terrestrial			other	N	N	Europe	France		PACA	Site	2010	Year	2010	2010	2010	2010	One-time	110000			163928	144674	110000	163928	144674	EUR	2010
IC_2.1_3457	NE3469	TC	FR33	Analyse économique des espèces exotiques envahissantes en France, Première enquête nationale (2009-2013)	Annelaure Wittmann, Aheli FLores-Ferrer		2015	French	Unpublished material	NA	Yes	Animalia	Chordata	Mammalia	Rodentia	Sciuridae	Callosciurus	Callosciurus erythraeus		Pallas'e Squirrel	Terrestrial	Terrestrial			other	NA	N	Europe	France		PACA	Site	2011	Year	2011	2011	2011	2011	One-time	121500			184295	157365	121500	184295	157365	EUR	2011
IC_2.1_3458	NE3470	TC	FR33	Analyse économique des espèces exotiques envahissantes en France, Première enquête nationale (2009-2013)	Annelaure Wittmann, Aheli FLores-Ferrer		2015	French	Unpublished material	NA	Yes	Animalia	Chordata	Mammalia	Rodentia	Sciuridae	Callosciurus	Callosciurus erythraeus		Pallas'e Squirrel	Terrestrial	Terrestrial			other	NA	N	Europe	France		PACA	Site	2012	Year	2012	2012	2012	2012	One-time	125000			171459	158063	125000	171459	158063	EUR	2012
IC_2.1_3459	NE3471	TC	FR33	Analyse économique des espèces exotiques envahissantes en France, Première enquête nationale (2009-2013)	Annelaure Wittmann, Aheli FLores-Ferrer		2015	French	Unpublished material	NA	Yes	Animalia	Chordata	Mammalia	Rodentia	Sciuridae	Callosciurus	Callosciurus erythraeus		Pallas'e Squirrel	Terrestrial	Terrestrial			other	NA	N	Europe	France		PACA	Site	2013	Year	2013	2013	2013	2013	One-time	125000			174682	162049	125000	174682	162049	EUR	2013
IC_2.1_3460	NE3472	TC	FR33	Analyse économique des espèces exotiques envahissantes en France, Première enquête nationale (2009-2013)	Annelaure Wittmann, Aheli FLores-Ferrer		2015	French	Unpublished material	NA	Yes	Animalia	Chordata	Mammalia	Rodentia	Castoridae	Castor	Castor canadensis		American beaver	Aquatic/Terrestrial	Semi-aquatic			other	NA	N	Europe	France		Metropolitan France	Site	2011	Year	2011	2011	2011	2011	One-time	1539			2334.41	1993.28	1539	2334.41	1993.28	EUR	2011
IC_2.1_3461	NE3473	TC	FR33	Analyse économique des espèces exotiques envahissantes en France, Première enquête nationale (2009-2013)	Annelaure Wittmann, Aheli FLores-Ferrer		2015	French	Unpublished material	NA	Yes	Animalia	Chordata	Mammalia	Rodentia	Castoridae	Castor	Castor canadensis		American beaver	Aquatic/Terrestrial	Semi-aquatic			other	NA	N	Europe	France		Metropolitan France	Site	2012	Year	2012	2012	2012	2012	One-time	3709			5087.52	4690.05	3709	5087.52	4690.05	EUR	2012
IC_2.1_3635	NE3647	TC	FR28	Les espèces exotiques envahissantes dans les milieux aquatiques, Connaissances pratiques et expériences de gestion, vol2	Sarat E., Mazaubert E., Dutartre A., Poulet N., Soubeyran Y.		2015	French	Official report	NA	Yes	Animalia	Chordata	Mammalia	Rodentia	Myocastoridae	Myocastor	Myocastor coypus		Nutria	Aquatic/Terrestrial	Semi-aquatic			other	N	N	Europe	France	Loire-Atlantique	Loire-Atlantique	Site	2004 - 2010	Period	2004	2010	2004	2010	One-time	900			1032.7	1151.26	128.571	147.528	164.465	EUR	2015
IC_2.1_3636	NE3648	TC	FR28	Les espèces exotiques envahissantes dans les milieux aquatiques, Connaissances pratiques et expériences de gestion, vol2	Sarat E., Mazaubert E., Dutartre A., Poulet N., Soubeyran Y.		2015	French	Official report	NA	Yes	Animalia	Chordata	Mammalia	Rodentia	Myocastoridae	Myocastor	Myocastor coypus		Nutria	Aquatic/Terrestrial	Semi-aquatic			other	N	N	Europe	France	Gironde	Gironde	Site	2006-2013	Period	2006	2013	2006	2013	One-time	80000			91795.4	102334	10000	11474.4	12791.8	EUR	2015
IC_2.1_3637	NE3649	TC	FR33	Analyse économique des espèces exotiques envahissantes en France, Première enquête nationale (2009-2013)	Annelaure Wittmann, Aheli FLores-Ferrer		2015	French	Unpublished material	NA	Yes	Animalia	Chordata	Mammalia	Rodentia	Myocastoridae	Myocastor	Myocastor coypus		Ragodin	Aquatic/Terrestrial	Semi-aquatic			other	N	N	Europe	France		Metropolitan France	Site	2009	Year	2009	2009	2009	2009	One-time	500			796.805	662.127	500	796.805	662.127	EUR	2009
IC_2.1_3638	NE3650	TC	FR33	Analyse économique des espèces exotiques envahissantes en France, Première enquête nationale (2009-2013)	Annelaure Wittmann, Aheli FLores-Ferrer		2015	French	Unpublished material	NA	Yes	Animalia	Chordata	Mammalia	Rodentia	Myocastoridae	Myocastor	Myocastor coypus		Ragodin	Aquatic/Terrestrial	Semi-aquatic			other	N	N	Europe	France		Metropolitan France	Site	2010	Year	2010	2010	2010	2010	One-time	500			745.129	657.608	500	745.129	657.608	EUR	2010
IC_2.1_3639	NE3651	TC	FR33	Analyse économique des espèces exotiques envahissantes en France, Première enquête nationale (2009-2013)	Annelaure Wittmann, Aheli FLores-Ferrer		2015	French	Unpublished material	NA	Yes	Animalia	Chordata	Mammalia	Rodentia	Myocastoridae	Myocastor	Myocastor coypus		Ragodin	Aquatic/Terrestrial	Semi-aquatic			other	N	N	Europe	France		Metropolitan France	Site	2011	Year	2011	2011	2011	2011	One-time	500			758.417	647.591	500	758.417	647.591	EUR	2011
IC_2.1_3640	NE3652	TC	FR33	Analyse économique des espèces exotiques envahissantes en France, Première enquête nationale (2009-2013)	Annelaure Wittmann, Aheli FLores-Ferrer		2015	French	Unpublished material	NA	Yes	Animalia	Chordata	Mammalia	Rodentia	Myocastoridae	Myocastor	Myocastor coypus		Ragodin	Aquatic/Terrestrial	Semi-aquatic			other	N	N	Europe	France		Metropolitan France	Site	2012	Year	2012	2012	2012	2012	One-time	500			685.835	632.252	500	685.835	632.252	EUR	2012
IC_2.1_3641	NE3653	TC	FR33	Analyse économique des espèces exotiques envahissantes en France, Première enquête nationale (2009-2013)	Annelaure Wittmann, Aheli FLores-Ferrer		2015	French	Unpublished material	NA	Yes	Animalia	Chordata	Mammalia	Rodentia	Myocastoridae	Myocastor	Myocastor coypus		Ragodin	Aquatic/Terrestrial	Semi-aquatic			other	N	N	Europe	France		Metropolitan France	Site	2013	Year	2013	2013	2013	2013	One-time	5000			6987.29	6481.97	5000	6987.29	6481.97	EUR	2013
IC_2.1_3642	NE3654	TC	FR33	Analyse économique des espèces exotiques envahissantes en France, Première enquête nationale (2009-2013)	Annelaure Wittmann, Aheli FLores-Ferrer		2015	French	Unpublished material	NA	Yes	Animalia	Chordata	Mammalia	Rodentia	Diverse/Unspecified	Myocastor/Ondatra	Myocastor coypus/Ondatra zibethicus		Ragodin/muskrat	Aquatic/Terrestrial	Semi-aquatic			other	N	N	Europe	France	Poitou-Charentes	Poitou-Charentes	Site	2009	Year	2009	2009	2009	2009	One-time	25500			40637.1	33768.5	25500	40637.1	33768.5	EUR	2009
IC_2.1_3643	NE3655	TC	FR33	Analyse économique des espèces exotiques envahissantes en France, Première enquête nationale (2009-2013)	Annelaure Wittmann, Aheli FLores-Ferrer		2015	French	Unpublished material	NA	Yes	Animalia	Chordata	Mammalia	Rodentia	Diverse/Unspecified	Myocastor/Ondatra	Myocastor coypus/Ondatra zibethicus		Ragodin/muskrat	Aquatic/Terrestrial	Semi-aquatic			other	N	N	Europe	France	Poitou-Charentes	Poitou-Charentes	Site	2010	Year	2010	2010	2010	2010	One-time	9054			13492.8	11908	9054	13492.8	11908	EUR	2010
IC_2.1_3644	NE3656	TC	FR33	Analyse économique des espèces exotiques envahissantes en France, Première enquête nationale (2009-2013)	Annelaure Wittmann, Aheli FLores-Ferrer		2015	French	Unpublished material	NA	Yes	Animalia	Chordata	Mammalia	Rodentia	Diverse/Unspecified	Myocastor/Ondatra	Myocastor coypus/Ondatra zibethicus		Ragodin/muskrat	Aquatic/Terrestrial	Semi-aquatic			other	N	N	Europe	France	Poitou-Charentes	Poitou-Charentes	Site	2011	Year	2011	2011	2011	2011	One-time	15000			22752.5	19427.7	15000	22752.5	19427.7	EUR	2011
IC_2.1_3645	NE3657	TC	FR33	Analyse économique des espèces exotiques envahissantes en France, Première enquête nationale (2009-2013)	Annelaure Wittmann, Aheli FLores-Ferrer		2015	French	Unpublished material	NA	Yes	Animalia	Chordata	Mammalia	Rodentia	Diverse/Unspecified	Myocastor/Ondatra	Myocastor coypus/Ondatra zibethicus		Ragodin/muskrat	Aquatic/Terrestrial	Semi-aquatic			other	N	N	Europe	France	Poitou-Charentes	Poitou-Charentes	Site	2012	Year	2012	2012	2012	2012	One-time	30000			41150.1	37935.1	30000	41150.1	37935.1	EUR	2012
IC_2.1_3646	NE3658	TC	FR33	Analyse économique des espèces exotiques envahissantes en France, Première enquête nationale (2009-2013)	Annelaure Wittmann, Aheli FLores-Ferrer		2015	French	Unpublished material	NA	Yes	Animalia	Chordata	Mammalia	Rodentia	Diverse/Unspecified	Myocastor/Ondatra	Myocastor coypus/Ondatra zibethicus		Ragodin/muskrat	Aquatic/Terrestrial	Semi-aquatic			other	N	N	Europe	France	Poitou-Charentes	Poitou-Charentes	Site	2013	Year	2013	2013	2013	2013	One-time	22500			31442.8	29168.9	22500	31442.8	29168.9	EUR	2013
IC_2.1_3647	NE3659	TC	FR33	Analyse économique des espèces exotiques envahissantes en France, Première enquête nationale (2009-2013)	Annelaure Wittmann, Aheli FLores-Ferrer		2015	French	Unpublished material	NA	Yes	Animalia	Chordata	Mammalia	Rodentia	Diverse/Unspecified	Myocastor/Ondatra	Myocastor coypus/Ondatra zibethicus		Ragodin/muskrat	Aquatic/Terrestrial	Semi-aquatic			other	NA	N	Europe	France	Basse-Normandie	Basse-Normandie	Site	2009	Year	2009	2009	2009	2009	One-time	240300			382945	318218	240300	382945	318218	EUR	2009
IC_2.1_3648	NE3660	TC	FR33	Analyse économique des espèces exotiques envahissantes en France, Première enquête nationale (2009-2013)	Annelaure Wittmann, Aheli FLores-Ferrer		2015	French	Unpublished material	NA	Yes	Animalia	Chordata	Mammalia	Rodentia	Diverse/Unspecified	Myocastor/Ondatra	Myocastor coypus/Ondatra zibethicus		Ragodin/muskrat	Aquatic/Terrestrial	Semi-aquatic			other	NA	N	Europe	France	Basse-Normandie	Basse-Normandie	Site	2010	Year	2010	2010	2010	2010	One-time	227300			338736	298949	227300	338736	298949	EUR	2010
IC_2.1_3649	NE3661	TC	FR33	Analyse économique des espèces exotiques envahissantes en France, Première enquête nationale (2009-2013)	Annelaure Wittmann, Aheli FLores-Ferrer		2015	French	Unpublished material	NA	Yes	Animalia	Chordata	Mammalia	Rodentia	Diverse/Unspecified	Myocastor/Ondatra	Myocastor coypus/Ondatra zibethicus		Ragodin/muskrat	Aquatic/Terrestrial	Semi-aquatic			other	NA	N	Europe	France	Basse-Normandie	Basse-Normandie	Site	2011	Year	2011	2011	2011	2011	One-time	244200			370411	316283	244200	370411	316283	EUR	2011
IC_2.1_3650	NE3662	TC	FR33	Analyse économique des espèces exotiques envahissantes en France, Première enquête nationale (2009-2013)	Annelaure Wittmann, Aheli FLores-Ferrer		2015	French	Unpublished material	NA	Yes	Animalia	Chordata	Mammalia	Rodentia	Diverse/Unspecified	Myocastor/Ondatra	Myocastor coypus/Ondatra zibethicus		Ragodin/muskrat	Aquatic/Terrestrial	Semi-aquatic			other	NA	N	Europe	France	Basse-Normandie	Basse-Normandie	Site	2012	Year	2012	2012	2012	2012	One-time	230500			316170	291468	230500	316170	291468	EUR	2012
IC_2.1_3651	NE3663	TC	FR33	Analyse économique des espèces exotiques envahissantes en France, Première enquête nationale (2009-2013)	Annelaure Wittmann, Aheli FLores-Ferrer		2015	French	Unpublished material	NA	Yes	Animalia	Chordata	Mammalia	Rodentia	Diverse/Unspecified	Myocastor/Ondatra	Myocastor coypus/Ondatra zibethicus		Ragodin/muskrat	Aquatic/Terrestrial	Semi-aquatic			other	NA	N	Europe	France	Basse-Normandie	Basse-Normandie	Site	2013	Year	2013	2013	2013	2013	One-time	147900			206684	191737	147900	206684	191737	EUR	2013
IC_2.1_3652	NE3664	TC	FR33	Analyse économique des espèces exotiques envahissantes en France, Première enquête nationale (2009-2013)	Annelaure Wittmann, Aheli FLores-Ferrer		2015	French	Unpublished material	NA	Yes	Animalia	Chordata	Mammalia	Rodentia	Diverse/Unspecified	Myocastor/Ondatra	Myocastor coypus/Ondatra zibethicus		Ragodin/muskrat	Aquatic/Terrestrial	Semi-aquatic			other	NA	N	Europe	France	Bourgogne	Bourgogne	Site	2010-2013	Period	2010	2013	2010	2013	One-time	1000			1397.46	1296.39	250	349.365	324.099	EUR	2013
IC_2.1_3653	NE3665	TC	FR33	Analyse économique des espèces exotiques envahissantes en France, Première enquête nationale (2009-2013)	Annelaure Wittmann, Aheli FLores-Ferrer		2015	French	Unpublished material	NA	Yes	Animalia	Chordata	Mammalia	Rodentia	Diverse/Unspecified	Myocastor/Ondatra	Myocastor coypus/Ondatra zibethicus		Ragodin/muskrat	Aquatic/Terrestrial	Semi-aquatic			other	NA	N	Europe	France	Nord-Pas-de-Calais	Nord-Pas-de-Calais	Site	2012	Year	2012	2012	2012	2012	One-time	78000			106990	98631.3	78000	106990	98631.3	EUR	2012
IC_2.1_3654	NE3666	TC	FR33	Analyse économique des espèces exotiques envahissantes en France, Première enquête nationale (2009-2013)	Annelaure Wittmann, Aheli FLores-Ferrer		2015	French	Unpublished material	NA	Yes	Animalia	Chordata	Mammalia	Rodentia	Diverse/Unspecified	Myocastor/Ondatra	Myocastor coypus/Ondatra zibethicus		Ragodin/muskrat	Aquatic/Terrestrial	Semi-aquatic			other	NA	N	Europe	France	Pays de la Loire	Pays de la Loire	Site	2009	Year	2009	2009	2009	2009	One-time	4252			6776.03	5630.73	4252	6776.03	5630.73	EUR	2009
IC_2.1_3655	NE3667	TC	FR33	Analyse économique des espèces exotiques envahissantes en France, Première enquête nationale (2009-2013)	Annelaure Wittmann, Aheli FLores-Ferrer		2015	French	Unpublished material	NA	Yes	Animalia	Chordata	Mammalia	Rodentia	Diverse/Unspecified	Myocastor/Ondatra	Myocastor coypus/Ondatra zibethicus		Ragodin/muskrat	Aquatic/Terrestrial	Semi-aquatic			other	NA	N	Europe	France	Pays de la Loire	Pays de la Loire	Site	2010	Year	2010	2010	2010	2010	One-time	3506			5224.85	4611.15	3506	5224.85	4611.15	EUR	2010
IC_2.1_3656	NE3668	TC	FR33	Analyse économique des espèces exotiques envahissantes en France, Première enquête nationale (2009-2013)	Annelaure Wittmann, Aheli FLores-Ferrer		2015	French	Unpublished material	NA	Yes	Animalia	Chordata	Mammalia	Rodentia	Diverse/Unspecified	Myocastor/Ondatra	Myocastor coypus/Ondatra zibethicus		Ragodin/muskrat	Aquatic/Terrestrial	Semi-aquatic			other	NA	N	Europe	France	Pays de la Loire	Pays de la Loire	Site	2011	Year	2011	2011	2011	2011	One-time	4167.58			6321.53	5397.77	4167.58	6321.53	5397.77	EUR	2011
IC_2.1_3657	NE3669	TC	FR33	Analyse économique des espèces exotiques envahissantes en France, Première enquête nationale (2009-2013)	Annelaure Wittmann, Aheli FLores-Ferrer		2015	French	Unpublished material	NA	Yes	Animalia	Chordata	Mammalia	Rodentia	Diverse/Unspecified	Myocastor/Ondatra	Myocastor coypus/Ondatra zibethicus		Ragodin/muskrat	Aquatic/Terrestrial	Semi-aquatic			other	NA	N	Europe	France	Pays de la Loire	Pays de la Loire	Site	2012	Year	2012	2012	2012	2012	One-time	4016.19			5508.88	5078.49	4016.19	5508.88	5078.49	EUR	2012
IC_2.1_3658	NE3670	TC	FR33	Analyse économique des espèces exotiques envahissantes en France, Première enquête nationale (2009-2013)	Annelaure Wittmann, Aheli FLores-Ferrer		2015	French	Unpublished material	NA	Yes	Animalia	Chordata	Mammalia	Rodentia	Diverse/Unspecified	Myocastor/Ondatra	Myocastor coypus/Ondatra zibethicus		Ragodin/muskrat	Aquatic/Terrestrial	Semi-aquatic			other	NA	N	Europe	France	Pays de la Loire	Pays de la Loire	Site	2013	Year	2013	2013	2013	2013	One-time	1355			1893.56	1756.61	1355	1893.56	1756.61	EUR	2013
IC_2.1_3659	NE3671	TC	FR33	Analyse économique des espèces exotiques envahissantes en France, Première enquête nationale (2009-2013)	Annelaure Wittmann, Aheli FLores-Ferrer		2015	French	Unpublished material	NA	Yes	Animalia	Chordata	Mammalia	Rodentia	Diverse/Unspecified	Myocastor/Ondatra	Myocastor coypus/Ondatra zibethicus		Ragodin/muskrat	Aquatic/Terrestrial	Semi-aquatic			other	NA	N	Europe	France	Poitou-Charentes	Poitou-Charentes	Site	2009	Year	2009	2009	2009	2009	One-time	181048			288520	239753	181048	288520	239753	EUR	2009
IC_2.1_3660	NE3672	TC	FR33	Analyse économique des espèces exotiques envahissantes en France, Première enquête nationale (2009-2013)	Annelaure Wittmann, Aheli FLores-Ferrer		2015	French	Unpublished material	NA	Yes	Animalia	Chordata	Mammalia	Rodentia	Diverse/Unspecified	Myocastor/Ondatra	Myocastor coypus/Ondatra zibethicus		Ragodin/muskrat	Aquatic/Terrestrial	Semi-aquatic			other	NA	N	Europe	France	Poitou-Charentes	Poitou-Charentes	Site	2011	Year	2011	2011	2011	2011	One-time	126830			192380	164268	126830	192380	164268	EUR	2011
IC_2.1_3661	NE3673	TC	FR33	Analyse économique des espèces exotiques envahissantes en France, Première enquête nationale (2009-2013)	Annelaure Wittmann, Aheli FLores-Ferrer		2015	French	Unpublished material	NA	Yes	Animalia	Chordata	Mammalia	Rodentia	Diverse/Unspecified	Myocastor/Ondatra	Myocastor coypus/Ondatra zibethicus		Ragodin/muskrat	Aquatic/Terrestrial	Semi-aquatic			other	NA	N	Europe	France	Poitou-Charentes	Poitou-Charentes	Site	2012	Year	2012	2012	2012	2012	One-time	138486			189957	175116	138486	189957	175116	EUR	2012
IC_2.1_3662	NE3674	TC	FR33	Analyse économique des espèces exotiques envahissantes en France, Première enquête nationale (2009-2013)	Annelaure Wittmann, Aheli FLores-Ferrer		2015	French	Unpublished material	NA	Yes	Animalia	Chordata	Mammalia	Rodentia	Diverse/Unspecified	Myocastor/Ondatra	Myocastor coypus/Ondatra zibethicus		Ragodin/muskrat	Aquatic/Terrestrial	Semi-aquatic			other	NA	N	Europe	France	Poitou-Charentes	Poitou-Charentes	Site	2013	Year	2013	2013	2013	2013	One-time	146620			204895	190077	146620	204895	190077	EUR	2013
IC_2.1_3663	NE3675	TC	FR33	Analyse économique des espèces exotiques envahissantes en France, Première enquête nationale (2009-2013)	Annelaure Wittmann, Aheli FLores-Ferrer		2015	French	Unpublished material	NA	Yes	Animalia	Chordata	Mammalia	Rodentia	Diverse/Unspecified	Myocastor/Ondatra	Myocastor coypus/Ondatra zibethicus		Ragodin/muskrat	Aquatic/Terrestrial	Semi-aquatic			other	Y	N	Europe	France		Marais Poitevin	Site	2009	Year	2009	2009	2009	2009	One-time	402389			641251	532865	402389	641251	532865	EUR	2009
IC_2.1_3664	NE3676	TC	FR33	Analyse économique des espèces exotiques envahissantes en France, Première enquête nationale (2009-2013)	Annelaure Wittmann, Aheli FLores-Ferrer		2015	French	Unpublished material	NA	Yes	Animalia	Chordata	Mammalia	Rodentia	Diverse/Unspecified	Myocastor/Ondatra	Myocastor coypus/Ondatra zibethicus		Ragodin/muskrat	Aquatic/Terrestrial	Semi-aquatic			other	Y	N	Europe	France		Marais Poitevin	Site	2010	Year	2010	2010	2010	2010	One-time	412103			614140	542005	412103	614140	542005	EUR	2010
IC_2.1_3665	NE3677	TC	FR33	Analyse économique des espèces exotiques envahissantes en France, Première enquête nationale (2009-2013)	Annelaure Wittmann, Aheli FLores-Ferrer		2015	French	Unpublished material	NA	Yes	Animalia	Chordata	Mammalia	Rodentia	Diverse/Unspecified	Myocastor/Ondatra	Myocastor coypus/Ondatra zibethicus		Ragodin/muskrat	Aquatic/Terrestrial	Semi-aquatic			other	Y	N	Europe	France		Marais Poitevin	Site	2011	Year	2011	2011	2011	2011	One-time	407592			618250	527906	407592	618250	527906	EUR	2011
IC_2.1_3666	NE3678	TC	FR33	Analyse économique des espèces exotiques envahissantes en France, Première enquête nationale (2009-2013)	Annelaure Wittmann, Aheli FLores-Ferrer		2015	French	Unpublished material	NA	Yes	Animalia	Chordata	Mammalia	Rodentia	Diverse/Unspecified	Myocastor/Ondatra	Myocastor coypus/Ondatra zibethicus		Ragodin/muskrat	Aquatic/Terrestrial	Semi-aquatic			other	Y	N	Europe	France		Marais Poitevin	Site	2012	Year	2012	2012	2012	2012	One-time	327096			448667	413614	327096	448667	413614	EUR	2012
IC_2.1_3667	NE3679	TC	FR33	Analyse économique des espèces exotiques envahissantes en France, Première enquête nationale (2009-2013)	Annelaure Wittmann, Aheli FLores-Ferrer		2015	French	Unpublished material	NA	Yes	Animalia	Chordata	Mammalia	Rodentia	Diverse/Unspecified	Myocastor/Ondatra	Myocastor coypus/Ondatra zibethicus		Ragodin/muskrat	Aquatic/Terrestrial	Semi-aquatic			other	Y	N	Europe	France		Marais Poitevin	Site	2013	Year	2013	2013	2013	2013	One-time	304974			426188	395366	304974	426188	395366	EUR	2013
IC_2.1_3668	NE3680	TC	FR33	Analyse économique des espèces exotiques envahissantes en France, Première enquête nationale (2009-2013)	Annelaure Wittmann, Aheli FLores-Ferrer		2015	French	Unpublished material	NA	Yes	Animalia	Chordata	Mammalia	Rodentia	Diverse/Unspecified	Myocastor/Ondatra	Myocastor coypus/Ondatra zibethicus		Ragodin/muskrat	Aquatic/Terrestrial	Semi-aquatic			other	Y	N	Europe	France	Poitou-Charentes	Poitou-Charentes	Site	2009	Year	2009	2009	2009	2009	One-time	10700			17051.6	14169.5	10700	17051.6	14169.5	EUR	2009
IC_2.1_3669	NE3681	TC	FR33	Analyse économique des espèces exotiques envahissantes en France, Première enquête nationale (2009-2013)	Annelaure Wittmann, Aheli FLores-Ferrer		2015	French	Unpublished material	NA	Yes	Animalia	Chordata	Mammalia	Rodentia	Diverse/Unspecified	Myocastor/Ondatra	Myocastor coypus/Ondatra zibethicus		Ragodin/muskrat	Aquatic/Terrestrial	Semi-aquatic			other	Y	N	Europe	France	Poitou-Charentes	Poitou-Charentes	Site	2010	Year	2010	2010	2010	2010	One-time	16000			23844.1	21043.5	16000	23844.1	21043.5	EUR	2010
IC_2.1_3670	NE3682	TC	FR33	Analyse économique des espèces exotiques envahissantes en France, Première enquête nationale (2009-2013)	Annelaure Wittmann, Aheli FLores-Ferrer		2015	French	Unpublished material	NA	Yes	Animalia	Chordata	Mammalia	Rodentia	Diverse/Unspecified	Myocastor/Ondatra	Myocastor coypus/Ondatra zibethicus		Ragodin/muskrat	Aquatic/Terrestrial	Semi-aquatic			other	Y	N	Europe	France	Poitou-Charentes	Poitou-Charentes	Site	2011	Year	2011	2011	2011	2011	One-time	14000			21235.7	18132.5	14000	21235.7	18132.5	EUR	2011
IC_2.1_3671	NE3683	TC	FR33	Analyse économique des espèces exotiques envahissantes en France, Première enquête nationale (2009-2013)	Annelaure Wittmann, Aheli FLores-Ferrer		2015	French	Unpublished material	NA	Yes	Animalia	Chordata	Mammalia	Rodentia	Diverse/Unspecified	Myocastor/Ondatra	Myocastor coypus/Ondatra zibethicus		Ragodin/muskrat	Aquatic/Terrestrial	Semi-aquatic			other	Y	N	Europe	France	Poitou-Charentes	Poitou-Charentes	Site	2012 - 2013	Period	2012	2013	2012	2013	One-time	16000			22359.3	20742.3	8000	11179.7	10371.2	EUR	2013
IC_2.1_3704	NE3716	TC	FR28	Les espèces exotiques envahissantes dans les milieux aquatiques, Connaissances pratiques et expériences de gestion, vol2	Sarat E., Mazaubert E., Dutartre A., Poulet N., Soubeyran Y.		2015	French	Official report	NA	Yes	Animalia	Chordata	Mammalia	Rodentia	Cricetidae	Ondatra	Ondatra zibethicus		Muskrat	Semi-aquatic	Semi-aquatic			other	N	N	Europe	France		Marais Audomarois	Site	2013	Year	2013	2013	2013	2013	One-time	11991			16756.9	15545.1	11991	16756.9	15545.1	EUR	2013
IC_2.1_3732	NE3744	TC	FR33	Analyse économique des espèces exotiques envahissantes en France, Première enquête nationale (2009-2013)	Annelaure Wittmann, Aheli FLores-Ferrer		2015	French	Unpublished material	NA	Yes	Animalia	Chordata	Mammalia	Rodentia	Muridae	Rattus	Rattus sp.		NA	Terrestrial	Terrestrial			other	N	Y	Oceania/Pacific Islands	France		French Polynesia	Site	2009	Year	2009	2009	2009	2009	One-time	200000			318722	264851	200000	318722	264851	EUR	2009
IC_2.1_3733	NE3745	TC	FR33	Analyse économique des espèces exotiques envahissantes en France, Première enquête nationale (2009-2013)	Annelaure Wittmann, Aheli FLores-Ferrer		2015	French	Unpublished material	NA	Yes	Animalia	Chordata	Mammalia	Rodentia	Muridae	Rattus	Rattus sp.		NA	Terrestrial	Terrestrial			other	N	Y	Oceania/Pacific Islands	France		French Polynesia	Site	2010	Year	2010	2010	2010	2010	One-time	200000			298052	263043	200000	298052	263043	EUR	2010
IC_2.1_3734	NE3746	TC	FR33	Analyse économique des espèces exotiques envahissantes en France, Première enquête nationale (2009-2013)	Annelaure Wittmann, Aheli FLores-Ferrer		2015	French	Unpublished material	NA	Yes	Animalia	Chordata	Mammalia	Rodentia	Muridae	Rattus	Rattus sp.		NA	Terrestrial	Terrestrial			other	N	Y	Oceania/Pacific Islands	France		French Polynesia	Site	2011	Year	2011	2011	2011	2011	One-time	200000			303367	259036	200000	303367	259036	EUR	2011
IC_2.1_3735	NE3747	TC	FR33	Analyse économique des espèces exotiques envahissantes en France, Première enquête nationale (2009-2013)	Annelaure Wittmann, Aheli FLores-Ferrer		2015	French	Unpublished material	NA	Yes	Animalia	Chordata	Mammalia	Rodentia	Muridae	Rattus	Rattus sp.		NA	Terrestrial	Terrestrial			other	N	Y	Oceania/Pacific Islands	France		French Polynesia	Site	2012	Year	2012	2012	2012	2012	One-time	220000			301767	278191	220000	301767	278191	EUR	2012
IC_2.1_3736	NE3748	TC	FR33	Analyse économique des espèces exotiques envahissantes en France, Première enquête nationale (2009-2013)	Annelaure Wittmann, Aheli FLores-Ferrer		2015	French	Unpublished material	NA	Yes	Animalia	Chordata	Mammalia	Rodentia	Muridae	Rattus	Rattus sp.		NA	Terrestrial	Terrestrial			other	N	Y	Oceania/Pacific Islands	France		French Polynesia	Site	2013	Year	2013	2013	2013	2013	One-time	220000			307441	285207	220000	307441	285207	EUR	2013
IC_2.1_3737	NE3749	TC	FR33	Analyse économique des espèces exotiques envahissantes en France, Première enquête nationale (2009-2013)	Annelaure Wittmann, Aheli FLores-Ferrer		2015	French	Unpublished material	NA	Yes	Animalia	Chordata	Mammalia	Rodentia	Muridae	Rattus	Rattus sp.		NA	Terrestrial	Terrestrial			other	N	Y	Oceania/Pacific Islands	France		French Polynesia	Site	2009	Year	2009	2009	2009	2009	One-time	44414			70778.6	58815.4	44414	70778.6	58815.4	EUR	2009
IC_2.1_3738	NE3750	TC	FR33	Analyse économique des espèces exotiques envahissantes en France, Première enquête nationale (2009-2013)	Annelaure Wittmann, Aheli FLores-Ferrer		2015	French	Unpublished material	NA	Yes	Animalia	Chordata	Mammalia	Rodentia	Muridae	Rattus	Rattus sp.		NA	Terrestrial	Terrestrial			other	N	Y	Oceania/Pacific Islands	France		French Polynesia	Site	2010	Year	2010	2010	2010	2010	One-time	44414			66188.4	58414	44414	66188.4	58414	EUR	2010
IC_2.1_3739	NE3751	TC	FR33	Analyse économique des espèces exotiques envahissantes en France, Première enquête nationale (2009-2013)	Annelaure Wittmann, Aheli FLores-Ferrer		2015	French	Unpublished material	NA	Yes	Animalia	Chordata	Mammalia	Rodentia	Muridae	Rattus	Rattus sp.		NA	Terrestrial	Terrestrial			other	N	Y	Oceania/Pacific Islands	France		French Polynesia	Site	2011	Year	2011	2011	2011	2011	One-time	44414			67368.7	57524.2	44414	67368.7	57524.2	EUR	2011
IC_2.1_3740	NE3752	TC	FR33	Analyse économique des espèces exotiques envahissantes en France, Première enquête nationale (2009-2013)	Annelaure Wittmann, Aheli FLores-Ferrer		2015	French	Unpublished material	NA	Yes	Animalia	Chordata	Mammalia	Rodentia	Muridae	Rattus	Rattus sp.		NA	Terrestrial	Terrestrial			other	N	Y	Oceania/Pacific Islands	France		French Polynesia	Site	2012	Year	2012	2012	2012	2012	One-time	10000			13716.7	12645	10000	13716.7	12645	EUR	2012
IC_2.1_3741	NE3753	TC	FR33	Analyse économique des espèces exotiques envahissantes en France, Première enquête nationale (2009-2013)	Annelaure Wittmann, Aheli FLores-Ferrer		2015	French	Unpublished material	NA	Yes	Animalia	Chordata	Mammalia	Rodentia	Muridae	Rattus	Rattus sp.		NA	Terrestrial	Terrestrial			other	Y	Y	Oceania/Pacific Islands	France		French Polynesia	Site	2009	Year	2009	2009	2009	2009	One-time	16760			26708.9	22194.5	16760	26708.9	22194.5	EUR	2009
IC_2.1_3742	NE3754	TC	FR33	Analyse économique des espèces exotiques envahissantes en France, Première enquête nationale (2009-2013)	Annelaure Wittmann, Aheli FLores-Ferrer		2015	French	Unpublished material	NA	Yes	Animalia	Chordata	Mammalia	Rodentia	Muridae	Rattus	Rattus sp.		NA	Terrestrial	Terrestrial			other	Y	Y	Oceania/Pacific Islands	France		French Polynesia	Site	2010	Year	2010	2010	2010	2010	One-time	16760			24976.7	22043	16760	24976.7	22043	EUR	2010
IC_2.1_3743	NE3755	TC	FR33	Analyse économique des espèces exotiques envahissantes en France, Première enquête nationale (2009-2013)	Annelaure Wittmann, Aheli FLores-Ferrer		2015	French	Unpublished material	NA	Yes	Animalia	Chordata	Mammalia	Rodentia	Muridae	Rattus	Rattus sp.		NA	Terrestrial	Terrestrial			other	Y	Y	Oceania/Pacific Islands	France		French Polynesia	Site	2012	Year	2012	2012	2012	2012	One-time	57629			79047.9	72872.1	57629	79047.9	72872.1	EUR	2012
IC_2.1_3744	NE3756	TC	FR33	Analyse économique des espèces exotiques envahissantes en France, Première enquête nationale (2009-2013)	Annelaure Wittmann, Aheli FLores-Ferrer		2015	French	Unpublished material	NA	Yes	Animalia	Chordata	Mammalia	Rodentia	Muridae	Rattus	Rattus sp.		NA	Terrestrial	Terrestrial			other	Y	Y	Oceania/Pacific Islands	France		French Polynesia	Site	2013	Year	2013	2013	2013	2013	One-time	57629			80534.1	74709.9	57629	80534.1	74709.9	EUR	2013
IC_2.1_3800	NE3813	TC	FR33	Analyse économique des espèces exotiques envahissantes en France, Première enquête nationale (2009-2013)	Annelaure Wittmann, Aheli FLores-Ferrer		2015	French	Unpublished material	NA	Yes	Animalia	Chordata	Mammalia	Rodentia	Sciuridae	Tamias	Tamias sibiricus		Siberian chipmunk	Terrestrial	Terrestrial			other	N	N	Europe	France	Ile-de-France	Ile-de-France	Site	2009	Year	2009	2009	2009	2009	One-time	100000			159361	132425	100000	159361	132425	EUR	2009
IC_2.1_3801	NE3814	TC	FR33	Analyse économique des espèces exotiques envahissantes en France, Première enquête nationale (2009-2013)	Annelaure Wittmann, Aheli FLores-Ferrer		2015	French	Unpublished material	NA	Yes	Animalia	Chordata	Mammalia	Rodentia	Sciuridae	Tamias	Tamias sibiricus		Siberian chipmunk	Terrestrial	Terrestrial			other	N	N	Europe	France	Ile-de-France	Ile-de-France	Site	2010	Year	2010	2010	2010	2010	One-time	100000			149026	131522	100000	149026	131522	EUR	2010
IC_2.1_3802	NE3815	TC	FR33	Analyse économique des espèces exotiques envahissantes en France, Première enquête nationale (2009-2013)	Annelaure Wittmann, Aheli FLores-Ferrer		2015	French	Unpublished material	NA	Yes	Animalia	Chordata	Mammalia	Rodentia	Sciuridae	Tamias	Tamias sibiricus		Siberian chipmunk	Terrestrial	Terrestrial			other	N	N	Europe	France	Ile-de-France	Ile-de-France	Site	2011	Year	2011	2011	2011	2011	One-time	100000			151683	129518	100000	151683	129518	EUR	2011
IC_2.1_3803	NE3816	TC	FR33	Analyse économique des espèces exotiques envahissantes en France, Première enquête nationale (2009-2013)	Annelaure Wittmann, Aheli FLores-Ferrer		2015	French	Unpublished material	NA	Yes	Animalia	Chordata	Mammalia	Rodentia	Sciuridae	Tamias	Tamias sibiricus		Siberian chipmunk	Terrestrial	Terrestrial			other	N	N	Europe	France	Ile-de-France	Ile-de-France	Site	2012	Year	2012	2012	2012	2012	One-time	100000			137167	126450	100000	137167	126450	EUR	2012
IC_2.1_3804	NE3817	TC	FR33	Analyse économique des espèces exotiques envahissantes en France, Première enquête nationale (2009-2013)	Annelaure Wittmann, Aheli FLores-Ferrer		2015	French	Unpublished material	NA	Yes	Animalia	Chordata	Mammalia	Rodentia	Sciuridae	Tamias	Tamias sibiricus		Siberian chipmunk	Terrestrial	Terrestrial			other	N	N	Europe	France	Ile-de-France	Ile-de-France	Site	2013	Year	2013	2013	2013	2013	One-time	100000			139746	129639	100000	139746	129639	EUR	2013
IC_2.1_4118	NE4132	TC	FR33	Analyse économique des espèces exotiques envahissantes en France, Première enquête nationale (2009-2013)	Annelaure Wittmann, Aheli FLores-Ferrer		2015	French	Unpublished material	NA	Yes	Animalia	Chordata	Mammalia	Rodentia	Muridae	Rattus	Rattus spp.		NA	Terrestrial	Terrestrial			other	Y	Y	Africa	France	La Reunion (Outre Mer)	La Reunion (Outre Mer)	Site	2010	Year	2010	2010	2010	2010	One-time	40500			60355.5	53266.3	40500	60355.5	53266.3	EUR	2010
IC_2.1_4119	NE4133	TC	FR33	Analyse économique des espèces exotiques envahissantes en France, Première enquête nationale (2009-2013)	Annelaure Wittmann, Aheli FLores-Ferrer		2015	French	Unpublished material	NA	Yes	Animalia	Chordata	Mammalia	Rodentia	Muridae	Rattus	Rattus spp.		NA	Terrestrial	Terrestrial			other	Y	Y	Africa	France	La Reunion (Outre Mer)	La Reunion (Outre Mer)	Site	2011	Year	2011	2011	2011	2011	One-time	106121			160968	137446	106121	160968	137446	EUR	2011
IC_2.1_4120	NE4134	TC	FR33	Analyse économique des espèces exotiques envahissantes en France, Première enquête nationale (2009-2013)	Annelaure Wittmann, Aheli FLores-Ferrer		2015	French	Unpublished material	NA	Yes	Animalia	Chordata	Mammalia	Rodentia	Muridae	Rattus	Rattus spp.		NA	Terrestrial	Terrestrial			other	Y	Y	Africa	France	La Reunion (Outre Mer)	La Reunion (Outre Mer)	Site	2012	Year	2012	2012	2012	2012	One-time	197173			270456	249326	197173	270456	249326	EUR	2012
IC_2.1_4121	NE4135	TC	FR33	Analyse économique des espèces exotiques envahissantes en France, Première enquête nationale (2009-2013)	Annelaure Wittmann, Aheli FLores-Ferrer		2015	French	Unpublished material	NA	Yes	Animalia	Chordata	Mammalia	Rodentia	Muridae	Rattus	Rattus spp.		NA	Terrestrial	Terrestrial			other	Y	Y	Africa	France	La Reunion (Outre Mer)	La Reunion (Outre Mer)	Site	2013	Year	2013	2013	2013	2013	One-time	197173			275541	255614	197173	275541	255614	EUR	2013
IC_2.1_4203	NE4217	TC	FR33	Analyse économique des espèces exotiques envahissantes en France, Première enquête nationale (2009-2013)	Annelaure Wittmann, Aheli FLores-Ferrer		2015	French	Unpublished material	NA	Yes	Animalia	Chordata	Mammalia	Rodentia	Muridae	Rattus	Rattus spp.		NA	Terrestrial	Terrestrial			other	Y	Y	Central America	France	Martinique	Martinique	Site	2013	Year	2013	2013	2013	2013	One-time	36530			51049.1	47357.3	36530	51049.1	47357.3	EUR	2013
IC_2.1_4321	NE4335	TC	FR33	Analyse économique des espèces exotiques envahissantes en France, Première enquête nationale (2009-2013)	Annelaure Wittmann, Aheli FLores-Ferrer		2015	French	Unpublished material	NA	Yes	Animalia	Chordata	Mammalia	Rodentia	Muridae	Diverse/Unspecified	Rattus sp./Mus musculus		NA	Terrestrial	Terrestrial			other	N	Y	Oceania/Pacific Islands	France		New Caledonia	Site	2009	Year	2009	2009	2009	2009	One-time	1006			1603.17	1332.2	1006	1603.17	1332.2	EUR	2009
IC_2.1_4322	NE4336	TC	FR33	Analyse économique des espèces exotiques envahissantes en France, Première enquête nationale (2009-2013)	Annelaure Wittmann, Aheli FLores-Ferrer		2015	French	Unpublished material	NA	Yes	Animalia	Chordata	Mammalia	Rodentia	Muridae	Diverse/Unspecified	Rattus sp./Mus musculus		NA	Terrestrial	Terrestrial			other	N	Y	Oceania/Pacific Islands	France		New Caledonia	Site	2010	Year	2010	2010	2010	2010	One-time	1006			1499.2	1323.11	1006	1499.2	1323.11	EUR	2010
IC_2.1_4323	NE4337	TC	FR33	Analyse économique des espèces exotiques envahissantes en France, Première enquête nationale (2009-2013)	Annelaure Wittmann, Aheli FLores-Ferrer		2015	French	Unpublished material	NA	Yes	Animalia	Chordata	Mammalia	Rodentia	Muridae	Diverse/Unspecified	Rattus sp./Mus musculus		NA	Terrestrial	Terrestrial			other	N	Y	Oceania/Pacific Islands	France		New Caledonia	Site	2011	Year	2011	2011	2011	2011	One-time	1006			1525.94	1302.95	1006	1525.94	1302.95	EUR	2011
IC_2.1_4324	NE4338	TC	FR33	Analyse économique des espèces exotiques envahissantes en France, Première enquête nationale (2009-2013)	Annelaure Wittmann, Aheli FLores-Ferrer		2015	French	Unpublished material	NA	Yes	Animalia	Chordata	Mammalia	Rodentia	Muridae	Diverse/Unspecified	Rattus sp./Mus musculus		NA	Terrestrial	Terrestrial			other	N	Y	Oceania/Pacific Islands	France		New Caledonia	Site	2012	Year	2012	2012	2012	2012	One-time	1006			1379.9	1272.09	1006	1379.9	1272.09	EUR	2012
IC_2.1_4325	NE4339	TC	FR33	Analyse économique des espèces exotiques envahissantes en France, Première enquête nationale (2009-2013)	Annelaure Wittmann, Aheli FLores-Ferrer		2015	French	Unpublished material	NA	Yes	Animalia	Chordata	Mammalia	Rodentia	Muridae	Diverse/Unspecified	Rattus sp./Mus musculus		NA	Terrestrial	Terrestrial			other	N	Y	Oceania/Pacific Islands	France		New Caledonia	Site	2013	Year	2013	2013	2013	2013	One-time	1006			1405.84	1304.17	1006	1405.84	1304.17	EUR	2013
IC_2.1_4356	NE4370	TC	FR33	Analyse économique des espèces exotiques envahissantes en France, Première enquête nationale (2009-2013)	Annelaure Wittmann, Aheli FLores-Ferrer		2015	French	Unpublished material	NA	Yes	Animalia	Chordata	Mammalia	Rodentia	Muridae	Diverse/Unspecified	Rattus sp./Mus musculus		NA	Terrestrial	Terrestrial			other	NA	Y	Central America	France		Saint-Martin	Site	2011	Year	2011	2011	2011	2011	One-time	5000			7584.17	6475.91	5000	7584.17	6475.91	EUR	2011
IC_2.1_4357	NE4371	TC	FR33	Analyse économique des espèces exotiques envahissantes en France, Première enquête nationale (2009-2013)	Annelaure Wittmann, Aheli FLores-Ferrer		2015	French	Unpublished material	NA	Yes	Animalia	Chordata	Mammalia	Rodentia	Muridae	Diverse/Unspecified	Rattus sp./Mus musculus		NA	Terrestrial	Terrestrial			other	NA	Y	Central America	France		Saint-Martin	Site	2012	Year	2012	2012	2012	2012	One-time	5000			6858.35	6322.52	5000	6858.35	6322.52	EUR	2012
IC_2.1_4358	NE4372	TC	FR33	Analyse économique des espèces exotiques envahissantes en France, Première enquête nationale (2009-2013)	Annelaure Wittmann, Aheli FLores-Ferrer		2015	French	Unpublished material	NA	Yes	Animalia	Chordata	Mammalia	Rodentia	Muridae	Diverse/Unspecified	Rattus sp./Mus musculus		NA	Terrestrial	Terrestrial			other	NA	Y	Central America	France		Saint-Martin	Site	2013	Year	2013	2013	2013	2013	One-time	10000			13974.6	12963.9	10000	13974.6	12963.9	EUR	2013
IC_2.1_4362	NE4376	TC	FR33	Analyse économique des espèces exotiques envahissantes en France, Première enquête nationale (2009-2013)	Annelaure Wittmann, Aheli FLores-Ferrer		2015	French	Unpublished material	NA	Yes	Animalia	Chordata	Mammalia	Rodentia	Muridae	Rattus	Rattus norvegicus		NA	Terrestrial	Terrestrial			other	Y	N	South America	France	French Guiana	French Guiana	Site	2009	Year	2009	2009	2009	2009	One-time	4736			7547.34	6271.67	4736	7547.34	6271.67	EUR	2009
IC_2.1_4363	NE4377	TC	FR33	Analyse économique des espèces exotiques envahissantes en France, Première enquête nationale (2009-2013)	Annelaure Wittmann, Aheli FLores-Ferrer		2015	French	Unpublished material	NA	Yes	Animalia	Chordata	Mammalia	Rodentia	Muridae	Rattus	Rattus norvegicus		NA	Terrestrial	Terrestrial			other	Y	N	South America	France	French Guiana	French Guiana	Site	2010	Year	2010	2010	2010	2010	One-time	4736			7057.87	6228.87	4736	7057.87	6228.87	EUR	2010
IC_2.1_4364	NE4378	TC	FR33	Analyse économique des espèces exotiques envahissantes en France, Première enquête nationale (2009-2013)	Annelaure Wittmann, Aheli FLores-Ferrer		2015	French	Unpublished material	NA	Yes	Animalia	Chordata	Mammalia	Rodentia	Muridae	Rattus	Rattus norvegicus		NA	Terrestrial	Terrestrial			other	Y	N	South America	France	French Guiana	French Guiana	Site	2011	Year	2011	2011	2011	2011	One-time	4736			7183.73	6133.98	4736	7183.73	6133.98	EUR	2011
IC_2.1_4365	NE4379	TC	FR33	Analyse économique des espèces exotiques envahissantes en France, Première enquête nationale (2009-2013)	Annelaure Wittmann, Aheli FLores-Ferrer		2015	French	Unpublished material	NA	Yes	Animalia	Chordata	Mammalia	Rodentia	Muridae	Rattus	Rattus norvegicus		NA	Terrestrial	Terrestrial			other	Y	N	South America	France	French Guiana	French Guiana	Site	2012	Year	2012	2012	2012	2012	One-time	4736			6496.22	5988.69	4736	6496.22	5988.69	EUR	2012
IC_2.1_4366	NE4380	TC	FR33	Analyse économique des espèces exotiques envahissantes en France, Première enquête nationale (2009-2013)	Annelaure Wittmann, Aheli FLores-Ferrer		2015	French	Unpublished material	NA	Yes	Animalia	Chordata	Mammalia	Rodentia	Muridae	Rattus	Rattus norvegicus		NA	Terrestrial	Terrestrial			other	Y	N	South America	France	French Guiana	French Guiana	Site	2013	Year	2013	2013	2013	2013	One-time	4736			6618.36	6139.72	4736	6618.36	6139.72	EUR	2013
IC_2.1_4393	NE4407	GS	AFR_28	Le cocotier dans l'Archipel des Comores	M. Delorme		1973	French	Peer-reviewed article	NA	Yes	Animalia	Chordata	Mammalia	Rodentia	Muridae	Rattus	Rattus rattus		Rat noir	Terrestrial	Terrestrial	Sandy	5	other	N	Y	Africa	Comoros		Comoros	Country	3 years	Period	Unspecified	Unspecified	1973	1976	One-time	140000000	130000000	150000000	1.73383e+07		35000000	4.33457e+06		MGA	1973
IC_2.1_4569	NE4585	GS	GER1	Economic Impact of the Spread of Alien Species in Germany (R+D Project 201 86 211 (UFOPLAN))	Reinhardt et al	In dem Entwurf einer European Strategy on Invasive Alien Species T-PVS (2002) 8 werden verstärkte Forschungsaktivitäten der Mitgliedstaaten angeregt, die nicht nur auf den biologischen Bereich oder Bekämpfung invasiver Arten beschränkt bleiben, sondern auch die Bewertung der Auswirkungen auf Gesundheitswesen und Volkswirtschaft untersuchen sollen. Derartige Studien wurden bisher nur für die Verei…	2003	German	Official report	Monreal, F. (1998) Arbeitsweisen der Gewasserunterhaltung. Geographisches Institut der Universität Bonn	Yes	Animalia	Chordata	Mammalia	Rodentia	Cricetidae	Ondatra	Ondatra zibethicus		Muskrat	Semi-aquatic	Semi-aquatic			other	N	NA	Europe	Germany		Germany	Country	2003	Year	2003	2003	2003	2003	One-time	314000000			4.73274e+08	4.66476e+08	314000000	4.73274e+08	4.66476e+08	EUR	2003
IC_2.1_4570	NE4586	GS	GER1	Economic Impact of the Spread of Alien Species in Germany (R+D Project 201 86 211 (UFOPLAN))	Reinhardt et al	In dem Entwurf einer European Strategy on Invasive Alien Species T-PVS (2002) 8 werden verstärkte Forschungsaktivitäten der Mitgliedstaaten angeregt, die nicht nur auf den biologischen Bereich oder Bekämpfung invasiver Arten beschränkt bleiben, sondern auch die Bewertung der Auswirkungen auf Gesundheitswesen und Volkswirtschaft untersuchen sollen. Derartige Studien wurden bisher nur für die Verei…	2003	German	Official report	Monreal, F. (1998) Arbeitsweisen der Gewasserunterhaltung. Geographisches Institut der Universität Bonn	Yes	Animalia	Chordata	Mammalia	Rodentia	Cricetidae	Ondatra	Ondatra zibethicus		Muskrat	Semi-aquatic	Semi-aquatic		11	other	N	NA	Europe	Germany		Germany	Country	1996-1997	Period	1996	1997	1996	1997	One-time	225600000			2.90698e+08	3.3663e+08	112800000	1.45349e+08	1.68315e+08	EUR	2002
IC_2.1_4571	NE4587	GS	GER1	Economic Impact of the Spread of Alien Species in Germany (R+D Project 201 86 211 (UFOPLAN))	Reinhardt et al	In dem Entwurf einer European Strategy on Invasive Alien Species T-PVS (2002) 8 werden verstärkte Forschungsaktivitäten der Mitgliedstaaten angeregt, die nicht nur auf den biologischen Bereich oder Bekämpfung invasiver Arten beschränkt bleiben, sondern auch die Bewertung der Auswirkungen auf Gesundheitswesen und Volkswirtschaft untersuchen sollen. Derartige Studien wurden bisher nur für die Verei…	2003	German	Official report	Monreal, F. (1998) Arbeitsweisen der Gewasserunterhaltung. Geographisches Institut der Universität Bonn	Yes	Animalia	Chordata	Mammalia	Rodentia	Cricetidae	Ondatra	Ondatra zibethicus		Muskrat	Semi-aquatic	Semi-aquatic		11	other	N	NA	Europe	Germany		Germany	Country	Unspecified	Year	2003	Unspecified	2003	2003	Potentially ongoing	2300000	2000000	2500000	2.96367e+06	3.43196e+06	2300000	2.96367e+06	3.43196e+06	EUR	2002
IC_2.1_4572	NE4588	GS	GER1	Economic Impact of the Spread of Alien Species in Germany (R+D Project 201 86 211 (UFOPLAN))	Reinhardt et al	In dem Entwurf einer European Strategy on Invasive Alien Species T-PVS (2002) 8 werden verstärkte Forschungsaktivitäten der Mitgliedstaaten angeregt, die nicht nur auf den biologischen Bereich oder Bekämpfung invasiver Arten beschränkt bleiben, sondern auch die Bewertung der Auswirkungen auf Gesundheitswesen und Volkswirtschaft untersuchen sollen. Derartige Studien wurden bisher nur für die Verei…	2003	German	Official report	Monreal, F. (1998) Arbeitsweisen der Gewasserunterhaltung. Geographisches Institut der Universität Bonn	Yes	Animalia	Chordata	Mammalia	Rodentia	Cricetidae	Ondatra	Ondatra zibethicus		Muskrat	Semi-aquatic	Semi-aquatic		11	other	N	NA	Europe	Germany		NA	Unit (Three commercial fish hatcheries)	Unspecified	Year	2003	Unspecified	2003	2003	Potentially ongoing	15000			19328.3	22382.3	15000	19328.3	22382.3	EUR	2002
IC_2.1_4573	NE4589	GS	GER1	Economic Impact of the Spread of Alien Species in Germany (R+D Project 201 86 211 (UFOPLAN))	Reinhardt et al	In dem Entwurf einer European Strategy on Invasive Alien Species T-PVS (2002) 8 werden verstärkte Forschungsaktivitäten der Mitgliedstaaten angeregt, die nicht nur auf den biologischen Bereich oder Bekämpfung invasiver Arten beschränkt bleiben, sondern auch die Bewertung der Auswirkungen auf Gesundheitswesen und Volkswirtschaft untersuchen sollen. Derartige Studien wurden bisher nur für die Verei…	2003	German	Official report	NA	Yes	Animalia	Chordata	Mammalia	Rodentia	Cricetidae	Ondatra	Ondatra zibethicus		Muskrat	Semi-aquatic	Semi-aquatic		11	other	N	NA	Europe	Germany		Germany	Country	Unspecified	Year	2003	Unspecified	2003	2003	Potentially ongoing	1600000	1000000	2700000	2.06169e+06	2.38745e+06	1600000	2.06169e+06	2.38745e+06	EUR	2002
IC_2.1_4574	NE4590	GS	GER1	Economic Impact of the Spread of Alien Species in Germany (R+D Project 201 86 211 (UFOPLAN))	Reinhardt et al	In dem Entwurf einer European Strategy on Invasive Alien Species T-PVS (2002) 8 werden verstärkte Forschungsaktivitäten der Mitgliedstaaten angeregt, die nicht nur auf den biologischen Bereich oder Bekämpfung invasiver Arten beschränkt bleiben, sondern auch die Bewertung der Auswirkungen auf Gesundheitswesen und Volkswirtschaft untersuchen sollen. Derartige Studien wurden bisher nur für die Verei…	2003	German	Official report	NA	Yes	Animalia	Chordata	Mammalia	Rodentia	Cricetidae	Ondatra	Ondatra zibethicus		Muskrat	Semi-aquatic	Semi-aquatic			other	N	NA	Europe	Germany		Germany	Country	Unspecified	Year	2003	Unspecified	2003	2003	Potentially ongoing	47000	8600	85800	60562	70131.3	47000	60562	70131.3	EUR	2002
IC_2.1_4705	NE4721	TC	NL10	Kostenraming voor de uitvoering van beheersplannen voor 28 Unielijstsoorten in Nederland	de Hoop et al		2017	Dutch	Official report	NA	Yes	Animalia	Chordata	Mammalia	Rodentia	Sciuridae	Callosciurus	Callosciurus erythraeus		Pallas squirrel	Terrestrial	Terrestrial			other	N	N	Europe	Netherlands		Diverse/Unspecified	Country	2018-2022	Period	2018	2022	2018	2022	One-time	20074			22677.2	25392.4	4014.8	4535.44	5078.47	EUR	2017
IC_2.1_4710	NE4726	TC	NL10	Kostenraming voor de uitvoering van beheersplannen voor 28 Unielijstsoorten in Nederland	de Hoop et al		2017	Dutch	Official report	NA	Yes	Animalia	Chordata	Mammalia	Rodentia	Sciuridae	Sciurus	Sciurus carolinensis		Grey squirrel	Terrestrial	Terrestrial			other	N	N	Europe	Netherlands		Diverse/Unspecified	Country	2018-2022	Period	2018	2022	2018	2022	One-time	25367			28656.6	32087.7	5073.4	5731.32	6417.53	EUR	2017
IC_2.1_4711	NE4727	TC	NL10	Kostenraming voor de uitvoering van beheersplannen voor 28 Unielijstsoorten in Nederland	de Hoop et al		2017	Dutch	Official report	NA	Yes	Animalia	Chordata	Mammalia	Rodentia	Sciuridae	Sciurus	Sciurus niger		Eastern Fox Squirrel	Terrestrial	Terrestrial			other	N	N	Europe	Netherlands		Diverse/Unspecified	Country	2018-2022	Period	2018	2022	2018	2022	One-time	82763			93495.8	104690	16552.6	18699.2	20938	EUR	2017
IC_2.1_4712	NE4728	TC	NL10	Kostenraming voor de uitvoering van beheersplannen voor 28 Unielijstsoorten in Nederland	de Hoop et al		2017	Dutch	Official report	NA	Yes	Animalia	Chordata	Mammalia	Rodentia	Sciuridae	Tamias	Tamias sibiricus		Siberian Chipmunk	Terrestrial	Terrestrial			other	N	N	Europe	Netherlands		Diverse/Unspecified	Country	2018-2022	Period	2018	2022	2018	2022	One-time	86455			97666.6	109360	17291	19533.3	21872	EUR	2017
IC_2.1_4720	NE4736	Gs	NL15	Pallas’ eekhoorn uitgeroeid in Dadizele (West-Vlaanderen)	Adriaens et al	In 2005, bark stripping and cable gnawing were observed in a suburban park in western Flanders (northern Belgium). The damage was linked to the occurrence of Pallas’s squirrels (Callosciurus erythraeus), a tree squirrel native to Asia. The population most probably originated from escaped animals of an abandoned zoo in the nearby amusement park. Pallas’s squirrel can reach high densities and outco…	2017	Dutch	Peer-reviewed article	NA	Yes	Animalia	Chordata	Mammalia	Rodentia	Sciuridae	Callosciurus	Callosciurus erythraeus		Pallas squirrel	Terrestrial	Terrestrial	park with trees	3	other	N	N	Europe	Belgium		Dadizele (West-Vlaanderen)	Site	2005-2011	Period	2005	2011	2005	2011	One-time	200000			225936	255966	28571.4	32276.6	36566.5	EUR	2017
IC_2.1_4727	NE4743	Go	NL4	Factsheet Muskusrat (Ondatra zibethicus)	NA		2018	Dutch	Official report	NA	Yes	Animalia	Chordata	Mammalia	Rodentia	Cricetidae	Ondatra	Ondatra zibethicus		Muskrat	Semi-aquatic	Semi-aquatic			other	N	N	Europe	Netherlands		Diverse/Unspecified	Country	Unspecified	Year	Unspecified	Unspecified	2018	2018	Potentially ongoing	35000000			4.03479e+07	4.28417e+07	35000000	4.03479e+07	4.28417e+07	EUR	2018
IC_2.1_4731	NE4747	Go	NL8	Exotische macrofauna en macrofyten in de Nederlandse zoete wateren	Verdonschot & Verdonschot		2012	Dutch	Official report	NA	Yes	Animalia	Chordata	Mammalia	Rodentia	Sciuridae	Callosciurus	Callosciurus erythraeus		Pallas squirrel	Terrestrial	Terrestrial	forest area in the south of the Netherlands	2	other	N	N	Europe	Netherlands		Forest area in South of the Netherlands	Site	Unspecified	Unspecified	Unspecified	Unspecified			One-time	150000			205750	194253				EUR	2012
IC_2.1_4780	NE4796	TC	JP_1	全国の野生鳥獣による農作物被害状況について（平成29年度）：（参考３９）野生鳥獣による農作物被害状況の推移	Ministry of Agriculture - Forestry and Fisheries (Japan)	農林水産省は、平成29年度の野生鳥獣による農作物被害状況について、都道府県からの報告を基にして、全国の被害状況を取りまとめました。（都道府県は、市町村からの報告を基に把握を行っています。） 被害状況の概要 1．鳥獣による平成29年度の農作物被害については、被害金額が約164億円で前年度に比べ約8億円減少（対前年5％減）、被害面積は約5万3千haで前年度に比べ約1万2千ha減少（対前年18％減）、被害量が約47万4千tで前年に比べ約1万3千t減少（対前年3％減）しています。 3．主要な獣種別の被害金額につい???????????????????????????????????????????????????????????????????????????????????????????????????????	2018	Japanese	Official report	NA	Yes	Animalia	Chordata	Mammalia	Rodentia	Myocastoridae	Myocastor	Myocastor coypus		Coypu	Terrestrial	Semi-aquatic	Agricultural field	12b	other	N	Y	Asia	Japan		Japan	Country	2000.April-2001.March	Year	2000	2001	2000	2001	Potentially ongoing	85000000			1.12275e+06	782030	85000000	1.12275e+06	782030	JPY	2000
IC_2.1_4781	NE4797	TC	JP_1	全国の野生鳥獣による農作物被害状況について（平成29年度）：（参考４０）野生鳥獣による農作物被害状況の推移	Ministry of Agriculture - Forestry and Fisheries (Japan)	農林水産省は、平成29年度の野生鳥獣による農作物被害状況について、都道府県からの報告を基にして、全国の被害状況を取りまとめました。（都道府県は、市町村からの報告を基に把握を行っています。） 被害状況の概要 1．鳥獣による平成29年度の農作物被害については、被害金額が約164億円で前年度に比べ約8億円減少（対前年5％減）、被害面積は約5万3千haで前年度に比べ約1万2千ha減少（対前年18％減）、被害量が約47万4千tで前年に比べ約1万3千t減少（対前年3％減）しています。 4．主要な獣種別の被害金額につい*?????,?-?????/?2?????)?*?????,?-?????/?2? ? ?)?*? ? ?,?-? ? ?/?2?!?!?)?*?!?!?,?-?!?!?/?2?"?"?)?*?"?"?,	2018	Japanese	Official report	NA	Yes	Animalia	Chordata	Mammalia	Rodentia	Myocastoridae	Myocastor	Myocastor coypus		Coypu	Terrestrial	Semi-aquatic	Agricultural field	12b	other	N	Y	Asia	Japan		Japan	Country	2001.April-2002.March	Year	2001	2002	2001	2002	Potentially ongoing	71000000			808760	656456	71000000	808760	656456	JPY	2001
IC_2.1_4782	NE4798	TC	JP_1	全国の野生鳥獣による農作物被害状況について（平成29年度）：（参考４１）野生鳥獣による農作物被害状況の推移	Ministry of Agriculture - Forestry and Fisheries (Japan)	農林水産省は、平成29年度の野生鳥獣による農作物被害状況について、都道府県からの報告を基にして、全国の被害状況を取りまとめました。（都道府県は、市町村からの報告を基に把握を行っています。） 被害状況の概要 1．鳥獣による平成29年度の農作物被害については、被害金額が約164億円で前年度に比べ約8億円減少（対前年5％減）、被害面積は約5万3千haで前年度に比べ約1万2千ha減少（対前年18％減）、被害量が約47万4千tで前年に比べ約1万3千t減少（対前年3％減）しています。 5．主要な獣種別の被害金額につい???????????????????????????????????????????????????????????????????????????????????????????????????????	2018	Japanese	Official report	NA	Yes	Animalia	Chordata	Mammalia	Rodentia	Myocastoridae	Myocastor	Myocastor coypus		Coypu	Terrestrial	Semi-aquatic	Agricultural field	12b	other	N	Y	Asia	Japan		Japan	Country	2002.April-2003.March	Year	2002	2003	2002	2003	Potentially ongoing	76000000			825971	720344	76000000	825971	720344	JPY	2002
IC_2.1_4783	NE4799	TC	JP_1	全国の野生鳥獣による農作物被害状況について（平成29年度）：（参考４２）野生鳥獣による農作物被害状況の推移	Ministry of Agriculture - Forestry and Fisheries (Japan)	農林水産省は、平成29年度の野生鳥獣による農作物被害状況について、都道府県からの報告を基にして、全国の被害状況を取りまとめました。（都道府県は、市町村からの報告を基に把握を行っています。） 被害状況の概要 1．鳥獣による平成29年度の農作物被害については、被害金額が約164億円で前年度に比べ約8億円減少（対前年5％減）、被害面積は約5万3千haで前年度に比べ約1万2千ha減少（対前年18％減）、被害量が約47万4千tで前年に比べ約1万3千t減少（対前年3％減）しています。 6．主要な獣種別の被害金額につい*?????,?-?????/?2?????)?*?????,?-?????/?2? ? ?)?*? ? ?,?-? ? ?/?2?!?!?)?*?!?!?,?-?!?!?/?2?"?"?)?*?"?"?,	2018	Japanese	Official report	NA	Yes	Animalia	Chordata	Mammalia	Rodentia	Myocastoridae	Myocastor	Myocastor coypus		Coypu	Terrestrial	Semi-aquatic	Agricultural field	12b	other	N	Y	Asia	Japan		Japan	Country	2003.April-2004.March	Year	2003	2004	2003	2004	Potentially ongoing	90000000			1.03441e+06	859561	90000000	1.03441e+06	859561	JPY	2003
IC_2.1_4784	NE4800	TC	JP_1	全国の野生鳥獣による農作物被害状況について（平成29年度）：（参考４３）野生鳥獣による農作物被害状況の推移	Ministry of Agriculture - Forestry and Fisheries (Japan)	農林水産省は、平成29年度の野生鳥獣による農作物被害状況について、都道府県からの報告を基にして、全国の被害状況を取りまとめました。（都道府県は、市町村からの報告を基に把握を行っています。） 被害状況の概要 1．鳥獣による平成29年度の農作物被害については、被害金額が約164億円で前年度に比べ約8億円減少（対前年5％減）、被害面積は約5万3千haで前年度に比べ約1万2千ha減少（対前年18％減）、被害量が約47万4千tで前年に比べ約1万3千t減少（対前年3％減）しています。 7．主要な獣種別の被害金額につい*?????,?-?????/?2?????)?*?????,?-?????/?2? ? ?)?*? ? ?,?-? ? ?/?2?!?!?)?*?!?!?,?-?!?!?/?2?"?"?)?)??????	2018	Japanese	Official report	NA	Yes	Animalia	Chordata	Mammalia	Rodentia	Myocastoridae	Myocastor	Myocastor coypus		Coypu	Terrestrial	Semi-aquatic	Agricultural field	12b	other	N	Y	Asia	Japan		Japan	Country	2004.April-2005.March	Year	2004	2005	2004	2005	Potentially ongoing	97000000			1.16348e+06	936863	97000000	1.16348e+06	936863	JPY	2004
IC_2.1_4785	NE4801	TC	JP_1	全国の野生鳥獣による農作物被害状況について（平成29年度）：（参考４４）野生鳥獣による農作物被害状況の推移	Ministry of Agriculture - Forestry and Fisheries (Japan)	農林水産省は、平成29年度の野生鳥獣による農作物被害状況について、都道府県からの報告を基にして、全国の被害状況を取りまとめました。（都道府県は、市町村からの報告を基に把握を行っています。） 被害状況の概要 1．鳥獣による平成29年度の農作物被害については、被害金額が約164億円で前年度に比べ約8億円減少（対前年5％減）、被害面積は約5万3千haで前年度に比べ約1万2千ha減少（対前年18％減）、被害量が約47万4千tで前年に比べ約1万3千t減少（対前年3％減）しています。 8．主要な獣種別の被害金額につい*?????,?-?????/?2?????)?*?????,?-?????/?2? ? ?)?*? ? ?,?-? ? ?/?2?!?!?)?*?!?!?,?-?!?!?/?2?"?"?)?)??????	2018	Japanese	Official report	NA	Yes	Animalia	Chordata	Mammalia	Rodentia	Myocastoridae	Myocastor	Myocastor coypus		Coypu	Terrestrial	Semi-aquatic	Agricultural field	12b	other	N	Y	Asia	Japan		Japan	Country	2005.April-2006.March	Year	2005	2006	2005	2006	Potentially ongoing	97000000			1.10462e+06	939771	97000000	1.10462e+06	939771	JPY	2005
IC_2.1_4786	NE4802	TC	JP_1	全国の野生鳥獣による農作物被害状況について（平成29年度）：（参考４５）野生鳥獣による農作物被害状況の推移	Ministry of Agriculture - Forestry and Fisheries (Japan)	農林水産省は、平成29年度の野生鳥獣による農作物被害状況について、都道府県からの報告を基にして、全国の被害状況を取りまとめました。（都道府県は、市町村からの報告を基に把握を行っています。） 被害状況の概要 1．鳥獣による平成29年度の農作物被害については、被害金額が約164億円で前年度に比べ約8億円減少（対前年5％減）、被害面積は約5万3千haで前年度に比べ約1万2千ha減少（対前年18％減）、被害量が約47万4千tで前年に比べ約1万3千t減少（対前年3％減）しています。 9．主要な獣種別の被害金額につい???????????????????????????????????????????????????????????????????????????????????????????????????????	2018	Japanese	Official report	NA	Yes	Animalia	Chordata	Mammalia	Rodentia	Myocastoridae	Myocastor	Myocastor coypus		Coypu	Terrestrial	Semi-aquatic	Agricultural field	12b	other	N	Y	Asia	Japan		Japan	Country	2006.April-2007.March	Year	2006	2007	2006	2007	Potentially ongoing	111000000			1.16052e+06	1.08375e+06	111000000	1.16052e+06	1.08375e+06	JPY	2006
IC_2.1_4787	NE4803	TC	JP_1	全国の野生鳥獣による農作物被害状況について（平成29年度）：（参考４６）野生鳥獣による農作物被害状況の推移	Ministry of Agriculture - Forestry and Fisheries (Japan)	農林水産省は、平成29年度の野生鳥獣による農作物被害状況について、都道府県からの報告を基にして、全国の被害状況を取りまとめました。（都道府県は、市町村からの報告を基に把握を行っています。） 被害状況の概要 1．鳥獣による平成29年度の農作物被害については、被害金額が約164億円で前年度に比べ約8億円減少（対前年5％減）、被害面積は約5万3千haで前年度に比べ約1万2千ha減少（対前年18％減）、被害量が約47万4千tで前年に比べ約1万3千t減少（対前年3％減）しています。10．主要な獣種別の被害金額につい*?????,?-?????/?2?????)?*?????,?-?????/?2? ? ?)?*? ? ?,?-? ? ?/?2?!?!?)?*?!?!?,?-?!?!?/?2?"?"?)?*??????	2018	Japanese	Official report	NA	Yes	Animalia	Chordata	Mammalia	Rodentia	Myocastoridae	Myocastor	Myocastor coypus		Coypu	Terrestrial	Semi-aquatic	Agricultural field	12b	other	N	Y	Asia	Japan		Japan	Country	2007.April-2008.March	Year	2007	2008	2007	2008	Potentially ongoing	124000000			1.24491e+06	1.2176e+06	124000000	1.24491e+06	1.2176e+06	JPY	2007
IC_2.1_4788	NE4804	TC	JP_1	全国の野生鳥獣による農作物被害状況について（平成29年度）：（参考４７）野生鳥獣による農作物被害状況の推移	Ministry of Agriculture - Forestry and Fisheries (Japan)	農林水産省は、平成29年度の野生鳥獣による農作物被害状況について、都道府県からの報告を基にして、全国の被害状況を取りまとめました。（都道府県は、市町村からの報告を基に把握を行っています。） 被害状況の概要 1．鳥獣による平成29年度の農作物被害については、被害金額が約164億円で前年度に比べ約8億円減少（対前年5％減）、被害面積は約5万3千haで前年度に比べ約1万2千ha減少（対前年18％減）、被害量が約47万4千tで前年に比べ約1万3千t減少（対前年3％減）しています。11．主要な獣種別の被害金額につい*?????,?-?????/?2?????)?*?????,?-?????/?2? ? ?)?*? ? ?,?-? ? ?/?2?!?!?)?*?!?!?,?-?!?!?/?2?"?"?)?*??????	2018	Japanese	Official report	NA	Yes	Animalia	Chordata	Mammalia	Rodentia	Myocastoridae	Myocastor	Myocastor coypus		Coypu	Terrestrial	Semi-aquatic	Agricultural field	12b	other	N	Y	Asia	Japan		Japan	Country	2008.April-2009.March	Year	2008	2009	2008	2009	Potentially ongoing	124000000			1.36584e+06	1.2082e+06	124000000	1.36584e+06	1.2082e+06	JPY	2008
IC_2.1_4789	NE4805	TC	JP_1	全国の野生鳥獣による農作物被害状況について（平成29年度）：（参考４８）野生鳥獣による農作物被害状況の推移	Ministry of Agriculture - Forestry and Fisheries (Japan)	農林水産省は、平成29年度の野生鳥獣による農作物被害状況について、都道府県からの報告を基にして、全国の被害状況を取りまとめました。（都道府県は、市町村からの報告を基に把握を行っています。） 被害状況の概要 1．鳥獣による平成29年度の農作物被害については、被害金額が約164億円で前年度に比べ約8億円減少（対前年5％減）、被害面積は約5万3千haで前年度に比べ約1万2千ha減少（対前年18％減）、被害量が約47万4千tで前年に比べ約1万3千t減少（対前年3％減）しています。12．主要な獣種別の被害金額につい???????????????????????????????????????????????????????????????????????????????????????????????????????	2018	Japanese	Official report	NA	Yes	Animalia	Chordata	Mammalia	Rodentia	Myocastoridae	Myocastor	Myocastor coypus		Coypu	Terrestrial	Semi-aquatic	Agricultural field	12b	other	N	Y	Asia	Japan		Japan	Country	2009.April-2010.March	Year	2009	2010	2009	2010	Potentially ongoing	113000000			1.3798e+06	1.12122e+06	113000000	1.3798e+06	1.12122e+06	JPY	2009
IC_2.1_4790	NE4806	TC	JP_1	全国の野生鳥獣による農作物被害状況について（平成29年度）：（参考４９）野生鳥獣による農作物被害状況の推移	Ministry of Agriculture - Forestry and Fisheries (Japan)	農林水産省は、平成29年度の野生鳥獣による農作物被害状況について、都道府県からの報告を基にして、全国の被害状況を取りまとめました。（都道府県は、市町村からの報告を基に把握を行っています。） 被害状況の概要 1．鳥獣による平成29年度の農作物被害については、被害金額が約164億円で前年度に比べ約8億円減少（対前年5％減）、被害面積は約5万3千haで前年度に比べ約1万2千ha減少（対前年18％減）、被害量が約47万4千tで前年に比べ約1万3千t減少（対前年3％減）しています。13．主要な獣種別の被害金額につい???????????????????????????????????????????????????????????????????????????????????????????????????????	2018	Japanese	Official report	NA	Yes	Animalia	Chordata	Mammalia	Rodentia	Myocastoridae	Myocastor	Myocastor coypus		Coypu	Terrestrial	Semi-aquatic	Agricultural field	12b	other	N	Y	Asia	Japan		Japan	Country	2010.April-2011.March	Year	2010	2011	2010	2011	Potentially ongoing	99000000			1.2678e+06	996605	99000000	1.2678e+06	996605	JPY	2010
IC_2.1_4791	NE4807	TC	JP_1	全国の野生鳥獣による農作物被害状況について（平成29年度）：（参考５０）野生鳥獣による農作物被害状況の推移	Ministry of Agriculture - Forestry and Fisheries (Japan)	農林水産省は、平成29年度の野生鳥獣による農作物被害状況について、都道府県からの報告を基にして、全国の被害状況を取りまとめました。（都道府県は、市町村からの報告を基に把握を行っています。） 被害状況の概要 1．鳥獣による平成29年度の農作物被害については、被害金額が約164億円で前年度に比べ約8億円減少（対前年5％減）、被害面積は約5万3千haで前年度に比べ約1万2千ha減少（対前年18％減）、被害量が約47万4千tで前年に比べ約1万3千t減少（対前年3％減）しています。14．主要な獣種別の被害金額につい???????????????????????????????????????????????????????????????????????????????????????????????????????	2018	Japanese	Official report	NA	Yes	Animalia	Chordata	Mammalia	Rodentia	Myocastoridae	Myocastor	Myocastor coypus		Coypu	Terrestrial	Semi-aquatic	Agricultural field	12b	other	N	Y	Asia	Japan		Japan	Country	2011.April-2012.March	Year	2011	2012	2011	2012	Potentially ongoing	112000000			1.52929e+06	1.13581e+06	112000000	1.52929e+06	1.13581e+06	JPY	2011
IC_2.1_4792	NE4808	TC	JP_1	全国の野生鳥獣による農作物被害状況について（平成29年度）：（参考５１）野生鳥獣による農作物被害状況の推移	Ministry of Agriculture - Forestry and Fisheries (Japan)	農林水産省は、平成29年度の野生鳥獣による農作物被害状況について、都道府県からの報告を基にして、全国の被害状況を取りまとめました。（都道府県は、市町村からの報告を基に把握を行っています。） 被害状況の概要 1．鳥獣による平成29年度の農作物被害については、被害金額が約164億円で前年度に比べ約8億円減少（対前年5％減）、被害面積は約5万3千haで前年度に比べ約1万2千ha減少（対前年18％減）、被害量が約47万4千tで前年に比べ約1万3千t減少（対前年3％減）しています。15．主要な獣種別の被害金額につい*?????,?-?????/?2?????)?*?????,?-?????/?2? ? ?)?*? ? ?,?-? ? ?/?2?!?!?)?*?!?!?,?-?!?!?/?2?"?"?)?*?"?"?,	2018	Japanese	Official report	NA	Yes	Animalia	Chordata	Mammalia	Rodentia	Myocastoridae	Myocastor	Myocastor coypus		Coypu	Terrestrial	Semi-aquatic	Agricultural field	12b	other	N	Y	Asia	Japan		Japan	Country	2012.April-2013.March	Year	2012	2013	2012	2013	Potentially ongoing	99000000			1.32465e+06	1.01362e+06	99000000	1.32465e+06	1.01362e+06	JPY	2012
IC_2.1_4793	NE4809	TC	JP_1	全国の野生鳥獣による農作物被害状況について（平成29年度）：（参考５２）野生鳥獣による農作物被害状況の推移	Ministry of Agriculture - Forestry and Fisheries (Japan)	農林水産省は、平成29年度の野生鳥獣による農作物被害状況について、都道府県からの報告を基にして、全国の被害状況を取りまとめました。（都道府県は、市町村からの報告を基に把握を行っています。） 被害状況の概要 1．鳥獣による平成29年度の農作物被害については、被害金額が約164億円で前年度に比べ約8億円減少（対前年5％減）、被害面積は約5万3千haで前年度に比べ約1万2千ha減少（対前年18％減）、被害量が約47万4千tで前年に比べ約1万3千t減少（対前年3％減）しています。16．主要な獣種別の被害金額につい*?????,?-?????/?2?????)?*?????,?-?????/?2? ? ?)?*? ? ?,?-? ? ?/?2?!?!?)?*?!?!?,?-?!?!?/?2?"?"?)?*?"?"?,	2018	Japanese	Official report	NA	Yes	Animalia	Chordata	Mammalia	Rodentia	Myocastoridae	Myocastor	Myocastor coypus		Coypu	Terrestrial	Semi-aquatic	Agricultural field	12b	other	N	Y	Asia	Japan		Japan	Country	2013.April-2014.March	Year	2013	2014	2013	2014	Potentially ongoing	85000000			916411	882877	85000000	916411	882877	JPY	2013
IC_2.1_4794	NE4810	TC	JP_1	全国の野生鳥獣による農作物被害状況について（平成29年度）：（参考５３）野生鳥獣による農作物被害状況の推移	Ministry of Agriculture - Forestry and Fisheries (Japan)	農林水産省は、平成29年度の野生鳥獣による農作物被害状況について、都道府県からの報告を基にして、全国の被害状況を取りまとめました。（都道府県は、市町村からの報告を基に把握を行っています。） 被害状況の概要 1．鳥獣による平成29年度の農作物被害については、被害金額が約164億円で前年度に比べ約8億円減少（対前年5％減）、被害面積は約5万3千haで前年度に比べ約1万2千ha減少（対前年18％減）、被害量が約47万4千tで前年に比べ約1万3千t減少（対前年3％減）しています。17．主要な獣種別の被害金額につい*?????,?-?????/?2?????)?*?????,?-?????/?2? ? ?)?*? ? ?,?-? ? ?/?2?!?!?)?*?!?!?,?-?!?!?/?2?"?"?)?*?"?"?,	2018	Japanese	Official report	NA	Yes	Animalia	Chordata	Mammalia	Rodentia	Myocastoridae	Myocastor	Myocastor coypus		Coypu	Terrestrial	Semi-aquatic	Agricultural field	12b	other	N	Y	Asia	Japan		Japan	Country	2014.April-2015.March	Year	2014	2015	2014	2015	Potentially ongoing	62000000			605934	622943	62000000	605934	622943	JPY	2014
IC_2.1_4795	NE4811	TC	JP_1	全国の野生鳥獣による農作物被害状況について（平成29年度）：（参考５４）野生鳥獣による農作物被害状況の推移	Ministry of Agriculture - Forestry and Fisheries (Japan)	農林水産省は、平成29年度の野生鳥獣による農作物被害状況について、都道府県からの報告を基にして、全国の被害状況を取りまとめました。（都道府県は、市町村からの報告を基に把握を行っています。） 被害状況の概要 1．鳥獣による平成29年度の農作物被害については、被害金額が約164億円で前年度に比べ約8億円減少（対前年5％減）、被害面積は約5万3千haで前年度に比べ約1万2千ha減少（対前年18％減）、被害量が約47万4千tで前年に比べ約1万3千t減少（対前年3％減）しています。18．主要な獣種別の被害金額につい*?????,?-?????/?2?????)?*?????,?-?????/?2? ? ?)?*? ? ?,?-? ? ?/?2?!?!?)?*?!?!?,?-?!?!?/?2?"?"?)?*?"?"?,	2018	Japanese	Official report	NA	Yes	Animalia	Chordata	Mammalia	Rodentia	Myocastoridae	Myocastor	Myocastor coypus		Coypu	Terrestrial	Semi-aquatic	Agricultural field	12b	other	N	Y	Asia	Japan		Japan	Country	2015.April-2016.March	Year	2015	2016	2015	2016	Potentially ongoing	57000000			487001	569828	57000000	487001	569828	JPY	2015
IC_2.1_4796	NE4812	TC	JP_1	全国の野生鳥獣による農作物被害状況について（平成29年度）：（参考５５）野生鳥獣による農作物被害状況の推移	Ministry of Agriculture - Forestry and Fisheries (Japan)	農林水産省は、平成29年度の野生鳥獣による農作物被害状況について、都道府県からの報告を基にして、全国の被害状況を取りまとめました。（都道府県は、市町村からの報告を基に把握を行っています。） 被害状況の概要 1．鳥獣による平成29年度の農作物被害については、被害金額が約164億円で前年度に比べ約8億円減少（対前年5％減）、被害面積は約5万3千haで前年度に比べ約1万2千ha減少（対前年18％減）、被害量が約47万4千tで前年に比べ約1万3千t減少（対前年3％減）しています。19．主要な獣種別の被害金額につい???????????????????????????????????????????????????????????????????????????????????????????????????????	2018	Japanese	Official report	NA	Yes	Animalia	Chordata	Mammalia	Rodentia	Myocastoridae	Myocastor	Myocastor coypus		Coypu	Terrestrial	Semi-aquatic	Agricultural field	12b	other	N	Y	Asia	Japan		Japan	Country	2016.April-2017.March	Year	2016	2017	2016	2017	Potentially ongoing	65000000			610192	646742	65000000	610192	646742	JPY	2016
IC_2.1_4797	NE4813	TC	JP_1	全国の野生鳥獣による農作物被害状況について（平成29年度）：（参考５６）野生鳥獣による農作物被害状況の推移	Ministry of Agriculture - Forestry and Fisheries (Japan)	農林水産省は、平成29年度の野生鳥獣による農作物被害状況について、都道府県からの報告を基にして、全国の被害状況を取りまとめました。（都道府県は、市町村からの報告を基に把握を行っています。） 被害状況の概要 1．鳥獣による平成29年度の農作物被害については、被害金額が約164億円で前年度に比べ約8億円減少（対前年5％減）、被害面積は約5万3千haで前年度に比べ約1万2千ha減少（対前年18％減）、被害量が約47万4千tで前年に比べ約1万3千t減少（対前年3％減）しています。20．主要な獣種別の被害金額につい???????????????????????????????????????????????????????????????????????????????????????????????????????	2018	Japanese	Official report	NA	Yes	Animalia	Chordata	Mammalia	Rodentia	Myocastoridae	Myocastor	Myocastor coypus		Coypu	Terrestrial	Semi-aquatic	Agricultural field	12b	other	N	Y	Asia	Japan		Japan	Country	2017.April-2018.March	Year	2017	2018	2017	2018	Potentially ongoing	58000000			517090	566017	58000000	517090	566017	JPY	2017
IC_2.1_4807	NE4823	TC	JP_1	全国の野生鳥獣による農作物被害状況について（平成29年度）：（参考７６）野生鳥獣による農作物被害状況の推移	Ministry of Agriculture - Forestry and Fisheries (Japan)	農林水産省は、平成29年度の野生鳥獣による農作物被害状況について、都道府県からの報告を基にして、全国の被害状況を取りまとめました。（都道府県は、市町村からの報告を基に把握を行っています。） 被害状況の概要 1．鳥獣による平成29年度の農作物被害については、被害金額が約164億円で前年度に比べ約8億円減少（対前年5％減）、被害面積は約5万3千haで前年度に比べ約1万2千ha減少（対前年18％減）、被害量が約47万4千tで前年に比べ約1万3千t減少（対前年3％減）しています。38．主要な獣種別の被害金額につい2?.?.?)?*?.?.?,?-?.?.?/?2?/?/?)?*?/?/?,?-?/?/?/?2?0?0?)?*?0?0?,?-?0?0?/?2?1?1?)?*?1?1?,?-?1?1?/?0??????	2018	Japanese	Official report	NA	Yes	Animalia	Chordata	Mammalia	Rodentia	Sciuridae	Callosciurus	Callosciurus erythraeus		Taiwan squirrels	Terrestrial	Terrestrial	Agricultural field	12b	other	N	Y	Asia	Japan		Japan	Country	2001.April-2002.March	Year	2001	2002	2001	2002	Potentially ongoing	2000000			22782	18491.7	2000000	22782	18491.7	JPY	2001
IC_2.1_4808	NE4824	TC	JP_1	全国の野生鳥獣による農作物被害状況について（平成29年度）：（参考７７）野生鳥獣による農作物被害状況の推移	Ministry of Agriculture - Forestry and Fisheries (Japan)	農林水産省は、平成29年度の野生鳥獣による農作物被害状況について、都道府県からの報告を基にして、全国の被害状況を取りまとめました。（都道府県は、市町村からの報告を基に把握を行っています。） 被害状況の概要 1．鳥獣による平成29年度の農作物被害については、被害金額が約164億円で前年度に比べ約8億円減少（対前年5％減）、被害面積は約5万3千haで前年度に比べ約1万2千ha減少（対前年18％減）、被害量が約47万4千tで前年に比べ約1万3千t減少（対前年3％減）しています。38．主要な獣種別の被害金額につい2?.?.?)?*?.?.?,?-?.?.?/?2?/?/?)?*?/?/?,?-?/?/?/?2?0?0?)?*?0?0?,?-?0?0?/?2?1?1?)?*?1?1?,?-?1?1?/?0??????	2018	Japanese	Official report	NA	Yes	Animalia	Chordata	Mammalia	Rodentia	Sciuridae	Callosciurus	Callosciurus erythraeus		Taiwan squirrels	Terrestrial	Terrestrial	Agricultural field	12b	other	N	Y	Asia	Japan		Japan	Country	2002.April-2003.March	Year	2002	2003	2002	2003	Potentially ongoing	1000000			10868	9478.21	1000000	10868	9478.21	JPY	2002
IC_2.1_4809	NE4825	TC	JP_1	全国の野生鳥獣による農作物被害状況について（平成29年度）：（参考７８）野生鳥獣による農作物被害状況の推移	Ministry of Agriculture - Forestry and Fisheries (Japan)	農林水産省は、平成29年度の野生鳥獣による農作物被害状況について、都道府県からの報告を基にして、全国の被害状況を取りまとめました。（都道府県は、市町村からの報告を基に把握を行っています。） 被害状況の概要 1．鳥獣による平成29年度の農作物被害については、被害金額が約164億円で前年度に比べ約8億円減少（対前年5％減）、被害面積は約5万3千haで前年度に比べ約1万2千ha減少（対前年18％減）、被害量が約47万4千tで前年に比べ約1万3千t減少（対前年3％減）しています。38．主要な獣種別の被害金額につい2?.?.?)?*?.?.?,?-?.?.?/?2?/?/?)?*?/?/?,?-?/?/?/?2?0?0?)?*?0?0?,?-?0?0?/?2?1?1?)?*?1?1?,?-?1?1?/?0??????	2018	Japanese	Official report	NA	Yes	Animalia	Chordata	Mammalia	Rodentia	Sciuridae	Callosciurus	Callosciurus erythraeus		Taiwan squirrels	Terrestrial	Terrestrial	Agricultural field	12b	other	N	Y	Asia	Japan		Japan	Country	2003.April-2004.March	Year	2003	2004	2003	2004	Potentially ongoing	1000000			11493.4	9550.68	1000000	11493.4	9550.68	JPY	2003
IC_2.1_4810	NE4826	TC	JP_1	全国の野生鳥獣による農作物被害状況について（平成29年度）：（参考８０）野生鳥獣による農作物被害状況の推移	Ministry of Agriculture - Forestry and Fisheries (Japan)	農林水産省は、平成29年度の野生鳥獣による農作物被害状況について、都道府県からの報告を基にして、全国の被害状況を取りまとめました。（都道府県は、市町村からの報告を基に把握を行っています。） 被害状況の概要 1．鳥獣による平成29年度の農作物被害については、被害金額が約164億円で前年度に比べ約8億円減少（対前年5％減）、被害面積は約5万3千haで前年度に比べ約1万2千ha減少（対前年18％減）、被害量が約47万4千tで前年に比べ約1万3千t減少（対前年3％減）しています。38．主要な獣種別の被害金額につい2?.?.?)?*?.?.?,?-?.?.?/?2?/?/?)?*?/?/?,?-?/?/?/?2?0?0?)?*?0?0?,?-?0?0?/?2?1?1?)?*?1?1?,?-?1?1?/?0??????	2018	Japanese	Official report	NA	Yes	Animalia	Chordata	Mammalia	Rodentia	Sciuridae	Callosciurus	Callosciurus erythraeus		Taiwan squirrels	Terrestrial	Terrestrial	Agricultural field	12b	other	N	Y	Asia	Japan		Japan	Country	2005.April-2006.March	Year	2005	2006	2005	2006	Potentially ongoing	2000000			22775.7	19376.7	2000000	22775.7	19376.7	JPY	2005
IC_2.1_4811	NE4827	TC	JP_1	全国の野生鳥獣による農作物被害状況について（平成29年度）：（参考８１）野生鳥獣による農作物被害状況の推移	Ministry of Agriculture - Forestry and Fisheries (Japan)	農林水産省は、平成29年度の野生鳥獣による農作物被害状況について、都道府県からの報告を基にして、全国の被害状況を取りまとめました。（都道府県は、市町村からの報告を基に把握を行っています。） 被害状況の概要 1．鳥獣による平成29年度の農作物被害については、被害金額が約164億円で前年度に比べ約8億円減少（対前年5％減）、被害面積は約5万3千haで前年度に比べ約1万2千ha減少（対前年18％減）、被害量が約47万4千tで前年に比べ約1万3千t減少（対前年3％減）しています。38．主要な獣種別の被害金額につい2?.?.?)?*?.?.?,?-?.?.?/?2?/?/?)?*?/?/?,?-?/?/?/?2?0?0?)?*?0?0?,?-?0?0?/?2?1?1?)?*?1?1?,?-?1?1?/?0??????	2018	Japanese	Official report	NA	Yes	Animalia	Chordata	Mammalia	Rodentia	Sciuridae	Callosciurus	Callosciurus erythraeus		Taiwan squirrels	Terrestrial	Terrestrial	Agricultural field	12b	other	N	Y	Asia	Japan		Japan	Country	2006.April-2007.March	Year	2006	2007	2006	2007	Potentially ongoing	14000000			146371	136690	14000000	146371	136690	JPY	2006
IC_2.1_4812	NE4828	TC	JP_1	全国の野生鳥獣による農作物被害状況について（平成29年度）：（参考８２）野生鳥獣による農作物被害状況の推移	Ministry of Agriculture - Forestry and Fisheries (Japan)	農林水産省は、平成29年度の野生鳥獣による農作物被害状況について、都道府県からの報告を基にして、全国の被害状況を取りまとめました。（都道府県は、市町村からの報告を基に把握を行っています。） 被害状況の概要 1．鳥獣による平成29年度の農作物被害については、被害金額が約164億円で前年度に比べ約8億円減少（対前年5％減）、被害面積は約5万3千haで前年度に比べ約1万2千ha減少（対前年18％減）、被害量が約47万4千tで前年に比べ約1万3千t減少（対前年3％減）しています。38．主要な獣種別の被害金額につい2?.?.?)?*?.?.?,?-?.?.?/?2?/?/?)?*?/?/?,?-?/?/?/?2?0?0?)?*?0?0?,?-?0?0?/?2?1?1?)?*?1?1?,?-?1?1?/?0??????	2018	Japanese	Official report	NA	Yes	Animalia	Chordata	Mammalia	Rodentia	Sciuridae	Callosciurus	Callosciurus erythraeus		Taiwan squirrels	Terrestrial	Terrestrial	Agricultural field	12b	other	N	Y	Asia	Japan		Japan	Country	2007.April-2008.March	Year	2007	2008	2007	2008	Potentially ongoing	6000000			60237.5	58916.3	6000000	60237.5	58916.3	JPY	2007
IC_2.1_4813	NE4829	TC	JP_1	全国の野生鳥獣による農作物被害状況について（平成29年度）：（参考８３）野生鳥獣による農作物被害状況の推移	Ministry of Agriculture - Forestry and Fisheries (Japan)	農林水産省は、平成29年度の野生鳥獣による農作物被害状況について、都道府県からの報告を基にして、全国の被害状況を取りまとめました。（都道府県は、市町村からの報告を基に把握を行っています。） 被害状況の概要 1．鳥獣による平成29年度の農作物被害については、被害金額が約164億円で前年度に比べ約8億円減少（対前年5％減）、被害面積は約5万3千haで前年度に比べ約1万2千ha減少（対前年18％減）、被害量が約47万4千tで前年に比べ約1万3千t減少（対前年3％減）しています。38．主要な獣種別の被害金額につい2?.?.?)?*?.?.?,?-?.?.?/?2?/?/?)?*?/?/?,?-?/?/?/?2?0?0?)?*?0?0?,?-?0?0?/?2?1?1?)?*?1?1?,?-?1?1?/?0??????	2018	Japanese	Official report	NA	Yes	Animalia	Chordata	Mammalia	Rodentia	Sciuridae	Callosciurus	Callosciurus erythraeus		Taiwan squirrels	Terrestrial	Terrestrial	Agricultural field	12b	other	N	Y	Asia	Japan		Japan	Country	2008.April-2009.March	Year	2008	2009	2008	2009	Potentially ongoing	6000000			66089.1	58461.1	6000000	66089.1	58461.1	JPY	2008
IC_2.1_4814	NE4830	TC	JP_1	全国の野生鳥獣による農作物被害状況について（平成29年度）：（参考８４）野生鳥獣による農作物被害状況の推移	Ministry of Agriculture - Forestry and Fisheries (Japan)	農林水産省は、平成29年度の野生鳥獣による農作物被害状況について、都道府県からの報告を基にして、全国の被害状況を取りまとめました。（都道府県は、市町村からの報告を基に把握を行っています。） 被害状況の概要 1．鳥獣による平成29年度の農作物被害については、被害金額が約164億円で前年度に比べ約8億円減少（対前年5％減）、被害面積は約5万3千haで前年度に比べ約1万2千ha減少（対前年18％減）、被害量が約47万4千tで前年に比べ約1万3千t減少（対前年3％減）しています。38．主要な獣種別の被害金額につい2?.?.?)?*?.?.?,?-?.?.?/?2?/?/?)?*?/?/?,?-?/?/?/?2?0?0?)?*?0?0?,?-?0?0?/?2?1?1?)?*?1?1?,?-?1?1?/?0??????	2018	Japanese	Official report	NA	Yes	Animalia	Chordata	Mammalia	Rodentia	Sciuridae	Callosciurus	Callosciurus erythraeus		Taiwan squirrels	Terrestrial	Terrestrial	Agricultural field	12b	other	N	Y	Asia	Japan		Japan	Country	2009.April-2010.March	Year	2009	2010	2009	2010	Potentially ongoing	8000000			97685.2	79378.3	8000000	97685.2	79378.3	JPY	2009
IC_2.1_4815	NE4831	TC	JP_1	全国の野生鳥獣による農作物被害状況について（平成29年度）：（参考８５）野生鳥獣による農作物被害状況の推移	Ministry of Agriculture - Forestry and Fisheries (Japan)	農林水産省は、平成29年度の野生鳥獣による農作物被害状況について、都道府県からの報告を基にして、全国の被害状況を取りまとめました。（都道府県は、市町村からの報告を基に把握を行っています。） 被害状況の概要 1．鳥獣による平成29年度の農作物被害については、被害金額が約164億円で前年度に比べ約8億円減少（対前年5％減）、被害面積は約5万3千haで前年度に比べ約1万2千ha減少（対前年18％減）、被害量が約47万4千tで前年に比べ約1万3千t減少（対前年3％減）しています。38．主要な獣種別の被害金額につい2?.?.?)?*?.?.?,?-?.?.?/?2?/?/?)?*?/?/?,?-?/?/?/?2?0?0?)?*?0?0?,?-?0?0?/?2?1?1?)?*?1?1?,?-?1?1?/?0??????	2018	Japanese	Official report	NA	Yes	Animalia	Chordata	Mammalia	Rodentia	Sciuridae	Callosciurus	Callosciurus erythraeus		Taiwan squirrels	Terrestrial	Terrestrial	Agricultural field	12b	other	N	Y	Asia	Japan		Japan	Country	2010.April-2011.March	Year	2010	2011	2010	2011	Potentially ongoing	6000000			76836.4	60400.3	6000000	76836.4	60400.3	JPY	2010
IC_2.1_4816	NE4832	TC	JP_1	全国の野生鳥獣による農作物被害状況について（平成29年度）：（参考８６）野生鳥獣による農作物被害状況の推移	Ministry of Agriculture - Forestry and Fisheries (Japan)	農林水産省は、平成29年度の野生鳥獣による農作物被害状況について、都道府県からの報告を基にして、全国の被害状況を取りまとめました。（都道府県は、市町村からの報告を基に把握を行っています。） 被害状況の概要 1．鳥獣による平成29年度の農作物被害については、被害金額が約164億円で前年度に比べ約8億円減少（対前年5％減）、被害面積は約5万3千haで前年度に比べ約1万2千ha減少（対前年18％減）、被害量が約47万4千tで前年に比べ約1万3千t減少（対前年3％減）しています。38．主要な獣種別の被害金額につい2?.?.?)?*?.?.?,?-?.?.?/?2?/?/?)?*?/?/?,?-?/?/?/?2?0?0?)?*?0?0?,?-?0?0?/?2?1?1?)?*?1?1?,?-?1?1?/?0??????	2018	Japanese	Official report	NA	Yes	Animalia	Chordata	Mammalia	Rodentia	Sciuridae	Callosciurus	Callosciurus erythraeus		Taiwan squirrels	Terrestrial	Terrestrial	Agricultural field	12b	other	N	Y	Asia	Japan		Japan	Country	2011.April-2012.March	Year	2011	2012	2011	2012	Potentially ongoing	9000000			122889	91270.8	9000000	122889	91270.8	JPY	2011
IC_2.1_4817	NE4833	TC	JP_1	全国の野生鳥獣による農作物被害状況について（平成29年度）：（参考８７）野生鳥獣による農作物被害状況の推移	Ministry of Agriculture - Forestry and Fisheries (Japan)	農林水産省は、平成29年度の野生鳥獣による農作物被害状況について、都道府県からの報告を基にして、全国の被害状況を取りまとめました。（都道府県は、市町村からの報告を基に把握を行っています。） 被害状況の概要 1．鳥獣による平成29年度の農作物被害については、被害金額が約164億円で前年度に比べ約8億円減少（対前年5％減）、被害面積は約5万3千haで前年度に比べ約1万2千ha減少（対前年18％減）、被害量が約47万4千tで前年に比べ約1万3千t減少（対前年3％減）しています。38．主要な獣種別の被害金額につい2?.?.?)?*?.?.?,?-?.?.?/?2?/?/?)?*?/?/?,?-?/?/?/?2?0?0?)?*?0?0?,?-?0?0?/?2?1?1?)?*?1?1?,?-?1?1?/?0??????	2018	Japanese	Official report	NA	Yes	Animalia	Chordata	Mammalia	Rodentia	Sciuridae	Callosciurus	Callosciurus erythraeus		Taiwan squirrels	Terrestrial	Terrestrial	Agricultural field	12b	other	N	Y	Asia	Japan		Japan	Country	2012.April-2013.March	Year	2012	2013	2012	2013	Potentially ongoing	7000000			93662.3	71670.4	7000000	93662.3	71670.4	JPY	2012
IC_2.1_4818	NE4834	TC	JP_1	全国の野生鳥獣による農作物被害状況について（平成29年度）：（参考８８）野生鳥獣による農作物被害状況の推移	Ministry of Agriculture - Forestry and Fisheries (Japan)	農林水産省は、平成29年度の野生鳥獣による農作物被害状況について、都道府県からの報告を基にして、全国の被害状況を取りまとめました。（都道府県は、市町村からの報告を基に把握を行っています。） 被害状況の概要 1．鳥獣による平成29年度の農作物被害については、被害金額が約164億円で前年度に比べ約8億円減少（対前年5％減）、被害面積は約5万3千haで前年度に比べ約1万2千ha減少（対前年18％減）、被害量が約47万4千tで前年に比べ約1万3千t減少（対前年3％減）しています。38．主要な獣種別の被害金額につい2?.?.?)?*?.?.?,?-?.?.?/?2?/?/?)?*?/?/?,?-?/?/?/?2?0?0?)?*?0?0?,?-?0?0?/?2?1?1?)?*?1?1?,?-?1?1?/?0??????	2018	Japanese	Official report	NA	Yes	Animalia	Chordata	Mammalia	Rodentia	Sciuridae	Callosciurus	Callosciurus erythraeus		Taiwan squirrels	Terrestrial	Terrestrial	Agricultural field	12b	other	N	Y	Asia	Japan		Japan	Country	2013.April-2014.March	Year	2013	2014	2013	2014	Potentially ongoing	4000000			43125.2	41547.1	4000000	43125.2	41547.1	JPY	2013
IC_2.1_4819	NE4835	TC	JP_1	全国の野生鳥獣による農作物被害状況について（平成29年度）：（参考８９）野生鳥獣による農作物被害状況の推移	Ministry of Agriculture - Forestry and Fisheries (Japan)	農林水産省は、平成29年度の野生鳥獣による農作物被害状況について、都道府県からの報告を基にして、全国の被害状況を取りまとめました。（都道府県は、市町村からの報告を基に把握を行っています。） 被害状況の概要 1．鳥獣による平成29年度の農作物被害については、被害金額が約164億円で前年度に比べ約8億円減少（対前年5％減）、被害面積は約5万3千haで前年度に比べ約1万2千ha減少（対前年18％減）、被害量が約47万4千tで前年に比べ約1万3千t減少（対前年3％減）しています。38．主要な獣種別の被害金額につい2?.?.?)?*?.?.?,?-?.?.?/?2?/?/?)?*?/?/?,?-?/?/?/?2?0?0?)?*?0?0?,?-?0?0?/?2?1?1?)?*?1?1?,?-?1?1?/?0??????	2018	Japanese	Official report	NA	Yes	Animalia	Chordata	Mammalia	Rodentia	Sciuridae	Callosciurus	Callosciurus erythraeus		Taiwan squirrels	Terrestrial	Terrestrial	Agricultural field	12b	other	N	Y	Asia	Japan		Japan	Country	2014.April-2015.March	Year	2014	2015	2014	2015	Potentially ongoing	6000000			58638.8	60284.8	6000000	58638.8	60284.8	JPY	2014
IC_2.1_4820	NE4836	TC	JP_1	全国の野生鳥獣による農作物被害状況について（平成29年度）：（参考９０）野生鳥獣による農作物被害状況の推移	Ministry of Agriculture - Forestry and Fisheries (Japan)	農林水産省は、平成29年度の野生鳥獣による農作物被害状況について、都道府県からの報告を基にして、全国の被害状況を取りまとめました。（都道府県は、市町村からの報告を基に把握を行っています。） 被害状況の概要 1．鳥獣による平成29年度の農作物被害については、被害金額が約164億円で前年度に比べ約8億円減少（対前年5％減）、被害面積は約5万3千haで前年度に比べ約1万2千ha減少（対前年18％減）、被害量が約47万4千tで前年に比べ約1万3千t減少（対前年3％減）しています。38．主要な獣種別の被害金額につい2?.?.?)?*?.?.?,?-?.?.?/?2?/?/?)?*?/?/?,?-?/?/?/?2?0?0?)?*?0?0?,?-?0?0?/?2?1?1?)?*?1?1?,?-?1?1?/?0??????	2018	Japanese	Official report	NA	Yes	Animalia	Chordata	Mammalia	Rodentia	Sciuridae	Callosciurus	Callosciurus erythraeus		Taiwan squirrels	Terrestrial	Terrestrial	Agricultural field	12b	other	N	Y	Asia	Japan		Japan	Country	2015.April-2016.March	Year	2015	2016	2015	2016	Potentially ongoing	12000000			102527	119964	12000000	102527	119964	JPY	2015
IC_2.1_4821	NE4837	TC	JP_1	全国の野生鳥獣による農作物被害状況について（平成29年度）：（参考９１）野生鳥獣による農作物被害状況の推移	Ministry of Agriculture - Forestry and Fisheries (Japan)	農林水産省は、平成29年度の野生鳥獣による農作物被害状況について、都道府県からの報告を基にして、全国の被害状況を取りまとめました。（都道府県は、市町村からの報告を基に把握を行っています。） 被害状況の概要 1．鳥獣による平成29年度の農作物被害については、被害金額が約164億円で前年度に比べ約8億円減少（対前年5％減）、被害面積は約5万3千haで前年度に比べ約1万2千ha減少（対前年18％減）、被害量が約47万4千tで前年に比べ約1万3千t減少（対前年3％減）しています。38．主要な獣種別の被害金額につい2?.?.?)?*?.?.?,?-?.?.?/?2?/?/?)?*?/?/?,?-?/?/?/?2?0?0?)?*?0?0?,?-?0?0?/?2?1?1?)?*?1?1?,?-?1?1?/?0??????	2018	Japanese	Official report	NA	Yes	Animalia	Chordata	Mammalia	Rodentia	Sciuridae	Callosciurus	Callosciurus erythraeus		Taiwan squirrels	Terrestrial	Terrestrial	Agricultural field	12b	other	N	Y	Asia	Japan		Japan	Country	2016.April-2017.March	Year	2016	2017	2016	2017	Potentially ongoing	4000000			37550.3	39799.5	4000000	37550.3	39799.5	JPY	2016
IC_2.1_4822	NE4838	TC	JP_1	全国の野生鳥獣による農作物被害状況について（平成29年度）：（参考９２）野生鳥獣による農作物被害状況の推移	Ministry of Agriculture - Forestry and Fisheries (Japan)	農林水産省は、平成29年度の野生鳥獣による農作物被害状況について、都道府県からの報告を基にして、全国の被害状況を取りまとめました。（都道府県は、市町村からの報告を基に把握を行っています。） 被害状況の概要 1．鳥獣による平成29年度の農作物被害については、被害金額が約164億円で前年度に比べ約8億円減少（対前年5％減）、被害面積は約5万3千haで前年度に比べ約1万2千ha減少（対前年18％減）、被害量が約47万4千tで前年に比べ約1万3千t減少（対前年3％減）しています。38．主要な獣種別の被害金額につい2?.?.?)?*?.?.?,?-?.?.?/?2?/?/?)?*?/?/?,?-?/?/?/?2?0?0?)?*?0?0?,?-?0?0?/?2?1?1?)?*?1?1?,?-?1?1?/?0??????	2018	Japanese	Official report	NA	Yes	Animalia	Chordata	Mammalia	Rodentia	Sciuridae	Callosciurus	Callosciurus erythraeus		Taiwan squirrels	Terrestrial	Terrestrial	Agricultural field	12b	other	N	Y	Asia	Japan		Japan	Country	2017.April-2018.March	Year	2017	2018	2017	2018	Potentially ongoing	2000000			17830.7	19517.8	2000000	17830.7	19517.8	JPY	2017
IC_2.1_4871	NE4887	GS	JP_15	宮古島市におけるサトウキビの野そ被害の推移と広域防除の効果	清水優子	宮古島市におけるサトウキビは1960年代後半と1970年前半に野そによる甚大な被害を受けた.これを契機にサトウキビ圃場を対象とした広域防除が開始され現在まで継続されてきたが,被害の推移や防除効果について総合的に検討した溝料がなかった.沖縄県病害虫防除技術センター宮古駐在に残る被害調査結果および,新聞などの資料を用いて防除対策についてまとめた.捕獲調査の結果.クマネズミが主要な加害種と考えられた野その被書はサトウキビの糖度が上昇する9月から増加し,収穫直前の12月が多かった.広域防除はサトウキビにおける野そによる甚大な被害を概ね抑圧していると考えられたしかし,一部地域では依然として被害が多い状態であったことから,防除の効果について地域単位で慎重に検討する必要があると考えられた．	2013	Japanese	Peer-reviewed article	Okinawa prefecture (2012) (Official Report)	Yes	Animalia	Chordata	Mammalia	Rodentia	Muridae	Rattus	Rattus rattus		Black rat	Terrestrial	Terrestrial	Sugar cane field	12b	other	N	Y	Asia	Japan		Miyako Island	Site	2011.April-2012.March	Year	2011	2012	2011	2012	Potentially ongoing	9637000			131587	97730.7	9637000	131587	97730.7	JPY	2011
IC_2.1_4913	NE4929	TC	JP_16	特定外来生物防除等推進事業	JUDGIT!	特定外来生物防除等推進事業 その他 府省庁: 環境省 事業番号: 0230 担当部局: 自然環境局 野生生物課外来生物対策室 事業期間: 2024年〜終了予定なし 会計区分: 一般会計 実施方法: 委託・請負 事業の目的 優先度の高い特定外来生物等の防除事業の実施することにより、生態系を保全する。 事業概要 生態系等への被害を防止するため、希少種の生息・生育地や国立公園など、我が国の生物多様性保全上特に重要な地域において定着が確認された特定外来生物、さらに、我が国で新たに定着が確認された、も??冰ᱳ????蚠???????????²???????¯?????????????????????????????䷰ᱪ?? 耀???????????????????????????????????????????????????????????????????????????????????????…	2019	Japanese	Web page	Ministry of the Environment (badget databese)	Yes	Animalia	Chordata	Mammalia	Rodentia	Sciuridae	Sciurus	Sciurus vulgaris		Eurasian squirrel	Terrestrial	Terrestrial	Forests	1	other	N	Y	Asia	Japan		Sayama hill in Tokyo	Site	2014.April-2015.March	Year	2014	2015	2014	2015	Potentially ongoing	3000000			29319.4	30142.4	3000000	29319.4	30142.4	JPY	2014
IC_2.1_4920	NE4936	TC	JP_16	特定外来生物防除等推進事業	JUDGIT!	特定外来生物防除等推進事業 その他 府省庁: 環境省 事業番号: 0230 担当部局: 自然環境局 野生生物課外来生物対策室 事業期間: 2024年〜終了予定なし 会計区分: 一般会計 実施方法: 委託・請負 事業の目的 優先度の高い特定外来生物等の防除事業の実施することにより、生態系を保全する。 事業概要 生態系等への被害を防止するため、希少種の生息・生育地や国立公園など、我が国の生物多様性保全上特に重要な地域において定着が確認された特定外来生物、さらに、我が国で新たに定着が確認された、も??冰ᱳ????蚠???????????²???????¯?????????????????????????????䷰ᱪ?? 耀???????????????????????????????????????????????????????????????????????????????????????…	2019	Japanese	Web page	Ministry of the Environment (badget databese)	Yes	Animalia	Chordata	Mammalia	Rodentia	Sciuridae	Sciurus	Sciurus vulgaris		Eurasian squirrel	Terrestrial	Terrestrial	Forests	1	other	N	Y	Asia	Japan		Sayama hill in Tokyo	Site	2015.April-2016.March	Year	2015	2016	2015	2016	Potentially ongoing	3000000			25631.6	29991	3000000	25631.6	29991	JPY	2015
IC_2.1_4924	NE4940	TC	JP_16	特定外来生物防除等推進事業	JUDGIT!	特定外来生物防除等推進事業 その他 府省庁: 環境省 事業番号: 0230 担当部局: 自然環境局 野生生物課外来生物対策室 事業期間: 2026年〜終了予定なし 会計区分: 一般会計 実施方法: 委託・請負 事業の目的 優先度の高い特定外来生物等の防除事業の実施することにより、生態系を保全する。 事業概要 生態系等への被害を防止するため、希少種の生息・生育地や国立公園など、我が国の生物多様性保全上特に重要な地域において定着が確認された特定外来生物、さらに、我が国で新たに定着が確認された、も??????????????????????????????????????????￪???????Ɛ??耀䀀㜀游ゴシック?hic???????????????????????쵈ᠩ￪???????Ɛ??Ā䀀㜀Calibri?c???????????????????????貰൝￪???????Ɛ??脀䀀…	2019	Japanese	Web page	Ministry of the Environment (badget databese)	Yes	Animalia	Chordata	Mammalia	Rodentia	Sciuridae	Callosciurus	Callosciurus erythraeus		Taiwan squirrels	Terrestrial	Terrestrial	Forests	1	other	N	Y	Asia	Japan		Kyushu region	Site	2014.april-2015.March	Year	2014	2015	2014	2015	Potentially ongoing	3000000			29319.4	30142.4	3000000	29319.4	30142.4	JPY	2014
IC_2.1_4934	NE4950	TC	JP_16	特定外来生物防除等推進事業	JUDGIT!	特定外来生物防除等推進事業 その他 府省庁: 環境省 事業番号: 0230 担当部局: 自然環境局 野生生物課外来生物対策室 事業期間: 2024年〜終了予定なし 会計区分: 一般会計 実施方法: 委託・請負 事業の目的 優先度の高い特定外来生物等の防除事業の実施することにより、生態系を保全する。 事業概要 生態系等への被害を防止するため、希少種の生息・生育地や国立公園など、我が国の生物多様性保全上特に重要な地域において定着が確認された特定外来生物、さらに、我が国で新たに定着が確認された、も??冰ᱳ????蚠???????????²???????¯?????????????????????????????䷰ᱪ?? 耀???????????????????????????????????????????????????????????????????????????????????????…	2019	Japanese	Web page	Ministry of the Environment (badget databese)	Yes	Animalia	Chordata	Mammalia	Rodentia	Sciuridae	Sciurus	Sciurus vulgaris		Eurasian squirrel	Terrestrial	Terrestrial	Forests	1	other	N	Y	Asia	Japan		Sayama hill in Tokyo	Site	2016.April-2017.March	Year	2016	2017	2016	2017	Potentially ongoing	2000000			18775.1	19899.8	2000000	18775.1	19899.8	JPY	2016
IC_2.1_4941	NE4957	TC	JP_16	特定外来生物防除等推進事業	JUDGIT!	特定外来生物防除等推進事業 その他 府省庁: 環境省 事業番号: 0230 担当部局: 自然環境局 野生生物課外来生物対策室 事業期間: 2024年〜終了予定なし 会計区分: 一般会計 実施方法: 委託・請負 事業の目的 優先度の高い特定外来生物等の防除事業の実施することにより、生態系を保全する。 事業概要 生態系等への被害を防止するため、希少種の生息・生育地や国立公園など、我が国の生物多様性保全上特に重要な地域において定着が確認された特定外来生物、さらに、我が国で新たに定着が確認された、も??冰ᱳ????蚠???????????²???????¯?????????????????????????????䷰ᱪ?? 耀???????????????????????????????????????????????????????????????????????????????????????…	2019	Japanese	Web page	Ministry of the Environment (badget databese)	Yes	Animalia	Chordata	Mammalia	Rodentia	Sciuridae	Sciurus	Sciurus vulgaris		Eurasian squirrel	Terrestrial	Terrestrial	Forests	1	other	N	Y	Asia	Japan		Sayama hill in Tokyo	Site	2017.April-2018.March	Year	2017	2018	2017	2018	Potentially ongoing	2000000			17830.7	19517.8	2000000	17830.7	19517.8	JPY	2017
IC_2.1_5040	NE5056	TC	JP_21	国立公園内生物多様性保全対策費	JUDGIT!	国立公園内生物多様性保全対策費 その他 府省庁: 環境省 事業番号: 0214 担当部局: 自然環境局 国立公園課 事業期間: 2003年〜終了予定なし 会計区分: 一般会計 実施方法: 委託・請負 事業の目的 生態系維持回復事業等の各種事業を体系的に展開するとともに、絶滅危惧種等の重要な動植物の保全を強化し、国立公園等の自然環境保全上重要な地域における生物多様性を保全する。さらに、利用調整等の管理手法の検討及び実施を通じて、過剰利用や生態系の攪乱を防止する。 事業概要 外来生物の侵入や里山の草刈り等の人為的な管理停止の影響により地域固有の生態系に影響が生じている地域において、生態系維持回復事業計画等に基づき、効果をモニタリングしながら順応的な生物多様性保全施策を実施する。また、平成25年3月に初めて侵入が確認された小笠原国立公園兄島におけるグリーンアノ－ルや平成27年10月に侵入を確認…	2019	Japanese	Web page	Ministry of the Environment (badget databese)	Yes	Animalia	Chordata	Mammalia	Rodentia	Muridae	Rattus	Rattus rattus		Black rat	Terrestrial	Terrestrial	Island forest	2	other	Y	Y	Asia	Japan		Ogasawara Islands	Site	2015.April-2016.March	Year	2015	2016	2015	2016	Potentially ongoing	22000000			187965	219934	22000000	187965	219934	JPY	2015
IC_2.1_5044	NE5060	TC	JP_21	国立公園内生物多様性保全対策費	JUDGIT!	国立公園内生物多様性保全対策費 その他 府省庁: 環境省 事業番号: 0214 担当部局: 自然環境局 国立公園課 事業期間: 2003年〜終了予定なし 会計区分: 一般会計 実施方法: 委託・請負 事業の目的 生態系維持回復事業等の各種事業を体系的に展開するとともに、絶滅危惧種等の重要な動植物の保全を強化し、国立公園等の自然環境保全上重要な地域における生物多様性を保全する。さらに、利用調整等の管理手法の検討及び実施を通じて、過剰利用や生態系の攪乱を防止する。 事業概要 外来生物の侵入や里山の草刈り等の人為的な管理停止の影響により地域固有の生態系に影響が生じている地域において、生態系維持回復事業計画等に基づき、効果をモニタリングしながら順応的な生物多様性保全施策を実施する。また、平成25年3月に初めて侵入が確認された小笠原国立公園兄島におけるグリーンアノ－ルや平成27年10月に侵入を確認…	2019	Japanese	Web page	Ministry of the Environment (badget databese)	Yes	Animalia	Chordata	Mammalia	Rodentia	Muridae	Rattus	Rattus rattus		Black rat	Terrestrial	Terrestrial	Island forest	2	other	Y	Y	Asia	Japan		Ani-jima Island	Site	2017.April-2019.March	Year	2017	2018	2017	2018	Potentially ongoing	10000000			89153.5	97589.2	10000000	89153.5	97589.2	JPY	2017
IC_2.1_5104	NE5120	TC	CH1	The distribution and economic losses of alien species invasion to China	Xu et al	2000年全国人口为126583万，出血热的发病率2.89/10万（卫生部网站），据此推算患者人数为36582人，病死率为0.74%，病死人数为270人，由于缺少Ⅱ型出血热发生的比例，可按种类所占的比例粗略估计，即50%，发病初期的治疗费用一般为5000元，而到中后期则需1万元至10万元，以平均2万元计，误工天数90日，入院率100%，2000年我国国民收入约7062元/人•年，丧葬费用为3000元/人，医疗费用共计36582万元，误工损失3185万元，丧葬费用41万元，合计39808万元	2006	Chinese	Peer-reviewed article	Xu et al. (2006) The distribution and economic losses of alien species invasion to China	Yes	Animalia	Chordata	Mammalia	Rodentia	Muridae	Rattus	Rattus norvegicus		汉坦病毒	Terrestrial	Terrestrial	Ruderal habitats (= urban)	12a	urban	N	N	Asia	China		China	Unit (18291 sufferer)	2000	Year	2000	2000	2000	2000	Potentially ongoing	398080000			6.84484e+07	2.09498e+08	398080000	6.84484e+07	2.09498e+08	CNY	2000
IC_2.1_5544	SC363	Go	93	The economic cost of invasive non-native species on Great Britain	Williams et al.	The impact of Invasive Non-Native Species (INNS) can be manifold, ranging from loss of crops, damaged buildings, and additional production costs to the loss of livelihoods and ecosystem services. INNS are increasingly abundant in Great Britain and in Europe generally and their impact is rising. Hence, INNS are the subject of considerable concern in Great Britain, prompting the development of a No…	2010	English	Official report	NA	Yes	Animalia	Chordata	Mammalia	Rodentia	Muridae	Rattus	Rattus norvegicus		brown rat	Terrestrial	Terrestrial			other	NA	Y	Europe	United Kingdom		Scotland	Site	Annual	Year	2010	Unspecified	2010	2010	Potentially ongoing	6054			10515.5	9690.17	6054	10515.5	9690.17	GBP	2010
IC_2.1_5591	SC412	Go	93	The economic cost of invasive non-native species on Great Britain	Williams et al.	The impact of Invasive Non-Native Species (INNS) can be manifold, ranging from loss of crops, damaged buildings, and additional production costs to the loss of livelihoods and ecosystem services. INNS are increasingly abundant in Great Britain and in Europe generally and their impact is rising. Hence, INNS are the subject of considerable concern in Great Britain, prompting the development of a No…	2010	English	Official report	NA	Yes	Animalia	Chordata	Mammalia	Rodentia	Muridae	Rattus	Rattus norvegicus		brown rat	Terrestrial	Terrestrial			other	NA	Y	Europe	United Kingdom		England/Wales/Scotland	Site	Year	Year	2010	Unspecified	2010	2010	Potentially ongoing	10000			17369.5	16006.2	10000	17369.5	16006.2	GBP	2010
IC_2.1_5642	SC465	Go	93	The economic cost of invasive non-native species on Great Britain	Williams et al.	The impact of Invasive Non-Native Species (INNS) can be manifold, ranging from loss of crops, damaged buildings, and additional production costs to the loss of livelihoods and ecosystem services. INNS are increasingly abundant in Great Britain and in Europe generally and their impact is rising. Hence, INNS are the subject of considerable concern in Great Britain, prompting the development of a No…	2010	English	Official report	NA	Yes	Animalia	Chordata	Mammalia	Rodentia	Sciuridae	Sciurus	Sciurus carolinensis		grey squirrel	Terrestrial	Terrestrial			other	NA	Y	Europe	United Kingdom		Scotland	Site	1 year	Year	2010	Unspecified	2010	2010	One-time	16368			28430.3	26199	16368	28430.3	26199	GBP	2010
IC_2.1_5680	SC503	Go	93	The economic cost of invasive non-native species on Great Britain	Williams et al.	The impact of Invasive Non-Native Species (INNS) can be manifold, ranging from loss of crops, damaged buildings, and additional production costs to the loss of livelihoods and ecosystem services. INNS are increasingly abundant in Great Britain and in Europe generally and their impact is rising. Hence, INNS are the subject of considerable concern in Great Britain, prompting the development of a No…	2010	English	Official report	NA	Yes	Animalia	Chordata	Mammalia	Rodentia	Muridae	Rattus	Rattus norvegicus		brown rat	Terrestrial	Terrestrial			other	NA	Y	Europe	United Kingdom		Scotland	Site	Annual	Year	2010	Unspecified	2010	2010	Potentially ongoing	21763			37801.2	34834.3	21763	37801.2	34834.3	GBP	2010
IC_2.1_5704	SC528	Go	93	The economic cost of invasive non-native species on Great Britain	Williams et al.	The impact of Invasive Non-Native Species (INNS) can be manifold, ranging from loss of crops, damaged buildings, and additional production costs to the loss of livelihoods and ecosystem services. INNS are increasingly abundant in Great Britain and in Europe generally and their impact is rising. Hence, INNS are the subject of considerable concern in Great Britain, prompting the development of a No…	2010	English	Official report	NA	Yes	Animalia	Chordata	Mammalia	Rodentia	Muridae	Rattus	Rattus spp.		rats	Terrestrial	Terrestrial			other	NA	Y	Europe	United Kingdom		Diverse/Unspecified	Country	2008-2012	Period	2008	2012	2008	2012	One-time	25785			44787.2	41272.1	5157	8957.43	8254.41	GBP	2010
IC_2.1_5842	SC669	Go	93	The economic cost of invasive non-native species on Great Britain	Williams et al.	The impact of Invasive Non-Native Species (INNS) can be manifold, ranging from loss of crops, damaged buildings, and additional production costs to the loss of livelihoods and ecosystem services. INNS are increasingly abundant in Great Britain and in Europe generally and their impact is rising. Hence, INNS are the subject of considerable concern in Great Britain, prompting the development of a No…	2010	English	Official report	NA	Yes	Animalia	Chordata	Mammalia	Rodentia	Muridae	Rattus	Rattus norvegicus		brown rat	Terrestrial	Terrestrial			other	NA	Y	Europe	United Kingdom	England	Lundy Island, England	Site	Unspecified	Period	Unspecified	Unspecified			Potentially ongoing	64136			111401	102658				GBP	2010
IC_2.1_5925	SC755	Go	93	The economic cost of invasive non-native species on Great Britain	Williams et al.	The impact of Invasive Non-Native Species (INNS) can be manifold, ranging from loss of crops, damaged buildings, and additional production costs to the loss of livelihoods and ecosystem services. INNS are increasingly abundant in Great Britain and in Europe generally and their impact is rising. Hence, INNS are the subject of considerable concern in Great Britain, prompting the development of a No…	2010	English	Official report	NA	Yes	Animalia	Chordata	Mammalia	Rodentia	Gliridae	Glis	Glis glis		edible dormouse	Terrestrial	Terrestrial			other	NA	Y	Europe	United Kingdom		England	Site	Year	Year	2010	Unspecified	2010	2010	Potentially ongoing	114000			198012	182471	114000	198012	182471	GBP	2010
IC_2.1_5947	SC778		Stoneman2005	The eradication of brown rats from Handa Island, Sutherland	Stoneman, J., Zonfrillo, B.	Burrow nesting seabirds declined after Brown Rats arrived on Handa Island some time after 1848. The eradication of Brown Rats in 1997 led to a rapid rise in numbers of some breeding seabirds while others increased their breeding areas or bred for the first time in living memory. The methods are based on modern commercial poisons and make the complete eradication of Brown Rats possible from the Sc…	2005	English	Peer-reviewed article	Ratcliffe, N., Mitchell, I., Varnham, K., Verboven, N., & Higson, P. (2009). How to prioritize rat management for the benefit of petrels: A case study of the UK, Channel Islands and Isle of Man. Ibis, 151(4), 699–708. https://doi.org/10.1111/j.1474-919X.2009.00949.x	Yes	Animalia	Chordata	Mammalia	Rodentia	Muridae	Rattus	Rattus norvegicus		Brown Rat	Terrestrial	Terrestrial	Rocky	6	other	Y	Y	Europe	United Kingdom	Scotland	Handa Island	Unit (Island)	23 - 29 March 1997	Year	1997	1997	1997	1997	One-time	135960			241995	218813	135960	241995	218813	GBP	2009
IC_2.1_5974	SC806	TC	MarylandDNR2004	Potential Economic Losses Associated With Uncontrolled Nutria Populations in Maryland's Portion of the Chesapeake Bay	Maryland Department of Natural Resources	Nutria (Myocaster coypus) are non-native aquatic mammals that are having an unprecedented negative effect on the marshes and ecology of the Chesapeake Bay. Since their introduction in the 1930's, nutria populations have continued to expand. With their high reproductive rate and voracious appetite for marsh grasses and root mats, they are now damaging hundreds of acres of valuable wetlands each ye…	2004	English	Peer-reviewed article	NA	Yes	Animalia	Chordata	Mammalia	Rodentia	Myocastoridae	Myocastor	Myocastor coypus		nutria	Aquatic	Semi-aquatic	Maryland's portion of the Chesapeake Bay; emergent wetlands	11	other	NA	N	North America	United States of America	Maryland	Chesapeake Bay	Unit (part of bay)	"current" + "2001"	Year	2001	2001	2001	2001	Potentially ongoing	168709			218939	218939	168709	218939	218939	USD	2004
IC_2.1_5984	SC816	Go	93	The economic cost of invasive non-native species on Great Britain	Williams et al.	The impact of Invasive Non-Native Species (INNS) can be manifold, ranging from loss of crops, damaged buildings, and additional production costs to the loss of livelihoods and ecosystem services. INNS are increasingly abundant in Great Britain and in Europe generally and their impact is rising. Hence, INNS are the subject of considerable concern in Great Britain, prompting the development of a No…	2010	English	Official report	NA	Yes	Animalia	Chordata	Mammalia	Rodentia	Sciuridae	Sciurus	Sciurus carolinensis		grey squirrel	Terrestrial	Terrestrial			other	NA	Y	Europe	United Kingdom		Diverse/Unspecified	Country	2009-2013	Period	2009	2013	2009	2013	One-time	182682			317309	292405	36536.4	63461.8	58481	GBP	2010
IC_2.1_5985	SC817	Go	93	The economic cost of invasive non-native species on Great Britain	Williams et al.	The impact of Invasive Non-Native Species (INNS) can be manifold, ranging from loss of crops, damaged buildings, and additional production costs to the loss of livelihoods and ecosystem services. INNS are increasingly abundant in Great Britain and in Europe generally and their impact is rising. Hence, INNS are the subject of considerable concern in Great Britain, prompting the development of a No…	2010	English	Official report	NA	Yes	Animalia	Chordata	Mammalia	Rodentia	Sciuridae	Sciurus	Sciurus carolinensis		grey squirrel	Terrestrial	Terrestrial			other	NA	Y	Europe	United Kingdom		Scotland	Site	Annual	Year	2010	Unspecified	2010	2010	Potentially ongoing	183067			317977	293021	183067	317977	293021	GBP	2010
IC_2.1_6030	SC865	Go	93	The economic cost of invasive non-native species on Great Britain	Williams et al.	The impact of Invasive Non-Native Species (INNS) can be manifold, ranging from loss of crops, damaged buildings, and additional production costs to the loss of livelihoods and ecosystem services. INNS are increasingly abundant in Great Britain and in Europe generally and their impact is rising. Hence, INNS are the subject of considerable concern in Great Britain, prompting the development of a No…	2010	English	Official report	NA	Yes	Animalia	Chordata	Mammalia	Rodentia	Gliridae	Glis	Glis glis		edible dormouse	Terrestrial	Terrestrial	forest/woodland	1\2	other	NA	Y	Europe	United Kingdom		England	Site	Year	Year	2010	Unspecified	2010	2010	Potentially ongoing	250000			434236	400156	250000	434236	400156	GBP	2010
IC_2.1_6048	SC883		Washington2017	Economic impact of invasive species: Direct costs estimates and economic impacts for Washington State	Community Attributes Inc. for Washington Invasive Species Council and Washington State Department of Agriculture		2017	English	Official report	NA	Yes	Animalia	Chordata	Mammalia	Rodentia	Myocastoridae	Myocastor	Myocastor coypus		Nutria	Semi-Aquatic	Semi-aquatic	grain, alfalfa, corn	12b	other	N	N	North America	United States of America	Washington	Washington State	Site	Unspecified	Year	Unspecified	Unspecified	2017	2017	Potentially ongoing	298000			298000	298000	298000	298000	298000	USD	2017
IC_2.1_6080	SC919	Go	93	The economic cost of invasive non-native species on Great Britain	Williams et al.	The impact of Invasive Non-Native Species (INNS) can be manifold, ranging from loss of crops, damaged buildings, and additional production costs to the loss of livelihoods and ecosystem services. INNS are increasingly abundant in Great Britain and in Europe generally and their impact is rising. Hence, INNS are the subject of considerable concern in Great Britain, prompting the development of a No…	2010	English	Official report	NA	Yes	Animalia	Chordata	Mammalia	Rodentia	Muridae	Rattus	Rattus norvegicus		brown rat	Terrestrial	Terrestrial			other	NA	Y	Europe	United Kingdom		England/Wales/Scotland	Country	Year	Year	2010	Unspecified	2010	2010	Potentially ongoing	371237			644819	594210	371237	644819	594210	GBP	2010
IC_2.1_6086	SC925	TC	225	Preventing extinctions: planning and undertaking invasive rodent eradication from Pinzon Island, Galapagos	Rueda D, Carrion V., Castaño P.A., Cunninghame F., Fisher P., Hagen E., Ponder J.B., Riekena C.A., Sevilla C., Shield H., Will D. and Campbell K.J.		2019	English	Peer-reviewed article	NA	No	Animalia	Chordata	Mammalia	Rodentia	Muridae	Rattus	Rattus rattus		black rat	Terrestrial	Terrestrial			other	Y	Y	South America	Ecuador	Galapagos Islands	Galapagos- Pinzon	Site	2012	Year	2012	2012	2012	2012	One-time	101000			106273		101000	106273		USD	2013
IC_2.1_6138	SC979	TC	MarylandDNR2004	Potential Economic Losses Associated With Uncontrolled Nutria Populations in Maryland's Portion of the Chesapeake Bay	Maryland Department of Natural Resources	Nutria (Myocaster coypus) are non-native aquatic mammals that are having an unprecedented negative effect on the marshes and ecology of the Chesapeake Bay. Since their introduction in the 1930's, nutria populations have continued to expand. With their high reproductive rate and voracious appetite for marsh grasses and root mats, they are now damaging hundreds of acres of valuable wetlands each ye…	2004	English	Peer-reviewed article	NA	Yes	Animalia	Chordata	Mammalia	Rodentia	Myocastoridae	Myocastor	Myocastor coypus		nutria	Aquatic	Semi-aquatic	Maryland's portion of the Chesapeake Bay; emergent wetlands	11	other	NA	N	North America	United States of America	Maryland	Chesapeake Bay	Unit (part of bay)	"current" + "2001"	Year	2001	2001	2001	2001	Potentially ongoing	541079			702174	702174	541079	702174	702174	USD	2004
IC_2.1_6172	SC1015	Go	93	The economic cost of invasive non-native species on Great Britain	Williams et al.	The impact of Invasive Non-Native Species (INNS) can be manifold, ranging from loss of crops, damaged buildings, and additional production costs to the loss of livelihoods and ecosystem services. INNS are increasingly abundant in Great Britain and in Europe generally and their impact is rising. Hence, INNS are the subject of considerable concern in Great Britain, prompting the development of a No…	2010	English	Official report	NA	Yes	Animalia	Chordata	Mammalia	Rodentia	Sciuridae	Sciurus	Sciurus carolinensis		grey squirrel	Terrestrial	Terrestrial			other	NA	Y	Europe	United Kingdom		England/Wales/Scotland	Site	Year	Year	2010	Unspecified	2010	2010	Potentially ongoing	661600			1.14916e+06	1.05897e+06	661600	1.14916e+06	1.05897e+06	GBP	2010
IC_2.1_6175	SC1019	Go	93	The economic cost of invasive non-native species on Great Britain	Williams et al.	The impact of Invasive Non-Native Species (INNS) can be manifold, ranging from loss of crops, damaged buildings, and additional production costs to the loss of livelihoods and ecosystem services. INNS are increasingly abundant in Great Britain and in Europe generally and their impact is rising. Hence, INNS are the subject of considerable concern in Great Britain, prompting the development of a No…	2010	English	Official report	NA	Yes	Animalia	Chordata	Mammalia	Rodentia	Muridae	Rattus	Rattus norvegicus		brown rat	Terrestrial	Terrestrial			other	NA	Y	Europe	United Kingdom	Scotland	Isle Of Canna	Site	3 years	Year	Unspecified	2010	2008	2010	Potentially ongoing	689184			1.19708e+06	1.10312e+06	689184	1.19708e+06	1.10312e+06	GBP	2010
IC_2.1_6221	SC1070	TC	225	Preventing extinctions: planning and undertaking invasive rodent eradication from Pinzon Island, Galapagos	Rueda D, Carrion V., Castaño P.A., Cunninghame F., Fisher P., Hagen E., Ponder J.B., Riekena C.A., Sevilla C., Shield H., Will D. and Campbell K.J.		2019	English	Peer-reviewed article	NA	No	Animalia	Chordata	Mammalia	Rodentia	Muridae	Rattus	Rattus rattus		black rat	Terrestrial	Terrestrial			other	Y	Y	South America	Ecuador	Galapagos Islands	Galapagos- Pinzon	Site	2012	Year	2012	2012	2012	2012	One-time	909000			956458		909000	956458		USD	2013
IC_2.1_6319	SC1184		Washington2017	Economic impact of invasive species: Direct costs estimates and economic impacts for Washington State	Community Attributes Inc. for Washington Invasive Species Council and Washington State Department of Agriculture		2017	English	Official report	NA	Yes	Animalia	Chordata	Mammalia	Rodentia	Myocastoridae	Myocastor	Myocastor coypus		Nutria	Semi-Aquatic	Semi-aquatic	croplands, stream banks, estuaries	9\12b	other	N	N	North America	United States of America	Washington	Washington State	Site	future	Year	Unspecified	Unspecified	2017	2017	Potentially ongoing	1779000			1779000	1779000	1779000	1779000	1779000	USD	2017
IC_2.1_6330	SC1197	Go	93	The economic cost of invasive non-native species on Great Britain	Williams et al.	The impact of Invasive Non-Native Species (INNS) can be manifold, ranging from loss of crops, damaged buildings, and additional production costs to the loss of livelihoods and ecosystem services. INNS are increasingly abundant in Great Britain and in Europe generally and their impact is rising. Hence, INNS are the subject of considerable concern in Great Britain, prompting the development of a No…	2010	English	Official report	NA	Yes	Animalia	Chordata	Mammalia	Rodentia	Sciuridae	Sciurus	Sciurus carolinensis		grey squirrel	Terrestrial	Terrestrial	properties	12	other	NA	Y	Europe	United Kingdom		England/Wales/Scotland	Country	Year	Year	2010	Unspecified	2010	2010	Potentially ongoing	1914555			3.32548e+06	3.06448e+06	1914555	3.32548e+06	3.06448e+06	GBP	2010
IC_2.1_6356	SC1227		Washington2017	Economic impact of invasive species: Direct costs estimates and economic impacts for Washington State	Community Attributes Inc. for Washington Invasive Species Council and Washington State Department of Agriculture		2017	English	Official report	NA	Yes	Animalia	Chordata	Mammalia	Rodentia	Myocastoridae	Myocastor	Myocastor coypus		Nutria	Semi-Aquatic	Semi-aquatic	stream banks, estuaries	9	other	N	N	North America	United States of America	Washington	Washington State	Site	future	Year	Unspecified	Unspecified	2017	2017	Potentially ongoing	2291000			2291000	2291000	2291000	2291000	2291000	USD	2017
IC_2.1_6401	SC1279	Go	93	The economic cost of invasive non-native species on Great Britain	Williams et al.	The impact of Invasive Non-Native Species (INNS) can be manifold, ranging from loss of crops, damaged buildings, and additional production costs to the loss of livelihoods and ecosystem services. INNS are increasingly abundant in Great Britain and in Europe generally and their impact is rising. Hence, INNS are the subject of considerable concern in Great Britain, prompting the development of a No…	2010	English	Official report	NA	Yes	Animalia	Chordata	Mammalia	Rodentia	Muridae	Rattus	Rattus norvegicus		brown rat	Terrestrial	Terrestrial	sewer systems	12	urban	NA	Y	Europe	United Kingdom		England/Wales/Scotland	Site	Year	Year	2010	Unspecified	2010	2010	Potentially ongoing	3243758			5.63423e+06	5.19203e+06	3243758	5.63423e+06	5.19203e+06	GBP	2010
IC_2.1_6473	SC1362	Go	93	The economic cost of invasive non-native species on Great Britain	Williams et al.	The impact of Invasive Non-Native Species (INNS) can be manifold, ranging from loss of crops, damaged buildings, and additional production costs to the loss of livelihoods and ecosystem services. INNS are increasingly abundant in Great Britain and in Europe generally and their impact is rising. Hence, INNS are the subject of considerable concern in Great Britain, prompting the development of a No…	2010	English	Official report	NA	Yes	Animalia	Chordata	Mammalia	Rodentia	Muridae	Rattus	Rattus norvegicus		brown rat	Terrestrial	Terrestrial	railways	12	other	NA	Y	Europe	United Kingdom		England/Wales/Scotland	Country	Year	Year	2010	Unspecified	2010	2010	Potentially ongoing	5060000			8.78895e+06	8.09915e+06	5060000	8.78895e+06	8.09915e+06	GBP	2010
IC_2.1_6475	SC1364	Go	93	The economic cost of invasive non-native species on Great Britain	Williams et al.	The impact of Invasive Non-Native Species (INNS) can be manifold, ranging from loss of crops, damaged buildings, and additional production costs to the loss of livelihoods and ecosystem services. INNS are increasingly abundant in Great Britain and in Europe generally and their impact is rising. Hence, INNS are the subject of considerable concern in Great Britain, prompting the development of a No…	2010	English	Official report	NA	Yes	Animalia	Chordata	Mammalia	Rodentia	Sciuridae	Sciurus	Sciurus carolinensis		grey squirrel	Terrestrial	Terrestrial	houses	12	other	NA	Y	Europe	United Kingdom		England/Wales/Scotland	Country	Year	Year	2010	Unspecified	2010	2010	Potentially ongoing	5128274			8.90753e+06	8.20843e+06	5128274	8.90753e+06	8.20843e+06	GBP	2010
IC_2.1_6477	SC1366	TC	MarylandDNR2004	Potential Economic Losses Associated With Uncontrolled Nutria Populations in Maryland's Portion of the Chesapeake Bay	Maryland Department of Natural Resources	Nutria (Myocaster coypus) are non-native aquatic mammals that are having an unprecedented negative effect on the marshes and ecology of the Chesapeake Bay. Since their introduction in the 1930's, nutria populations have continued to expand. With their high reproductive rate and voracious appetite for marsh grasses and root mats, they are now damaging hundreds of acres of valuable wetlands each ye…	2004	English	Peer-reviewed article	NA	Yes	Animalia	Chordata	Mammalia	Rodentia	Myocastoridae	Myocastor	Myocastor coypus		nutria	Aquatic	Semi-aquatic	Maryland's portion of the Chesapeake Bay; emergent wetlands	11	other	NA	N	North America	United States of America	Maryland	Chesapeake Bay	Unit (part of bay)	"current" + "2001"	Year	2001	2001	2001	2001	Potentially ongoing	5147780			6.68043e+06	6.68043e+06	5147780	6.68043e+06	6.68043e+06	USD	2004
IC_2.1_6500	SC1391		Washington2017	Economic impact of invasive species: Direct costs estimates and economic impacts for Washington State	Community Attributes Inc. for Washington Invasive Species Council and Washington State Department of Agriculture		2017	English	Official report	NA	Yes	Animalia	Chordata	Mammalia	Rodentia	Myocastoridae	Myocastor	Myocastor coypus		Nutria	Semi-Aquatic	Semi-aquatic	croplands, stream banks, estuaries	9\12b	other	N	N	North America	United States of America	Washington	Washington State	Site	future	Year	Unspecified	Unspecified	2017	2017	Potentially ongoing	6104000			6104000	6104000	6104000	6104000	6104000	USD	2017
IC_2.1_6547	SC1456	TC	MarylandDNR2004	Potential Economic Losses Associated With Uncontrolled Nutria Populations in Maryland's Portion of the Chesapeake Bay	Maryland Department of Natural Resources	Nutria (Myocaster coypus) are non-native aquatic mammals that are having an unprecedented negative effect on the marshes and ecology of the Chesapeake Bay. Since their introduction in the 1930's, nutria populations have continued to expand. With their high reproductive rate and voracious appetite for marsh grasses and root mats, they are now damaging hundreds of acres of valuable wetlands each ye…	2004	English	Peer-reviewed article	NA	Yes	Animalia	Chordata	Mammalia	Rodentia	Myocastoridae	Myocastor	Myocastor coypus		nutria	Aquatic	Semi-aquatic	Maryland's portion of the Chesapeake Bay; emergent wetlands	11	other	NA	N	North America	United States of America	Maryland	Chesapeake Bay	Unit (part of bay)	"over the next 50 years"	Year	2002	2051	2002	2051	Potentially ongoing	8722843			1.13199e+07	1.13199e+07	8722843	1.13199e+07	1.13199e+07	USD	2004
IC_2.1_6640	SC1577	Go	93	The economic cost of invasive non-native species on Great Britain	Williams et al.	The impact of Invasive Non-Native Species (INNS) can be manifold, ranging from loss of crops, damaged buildings, and additional production costs to the loss of livelihoods and ecosystem services. INNS are increasingly abundant in Great Britain and in Europe generally and their impact is rising. Hence, INNS are the subject of considerable concern in Great Britain, prompting the development of a No…	2010	English	Official report	NA	Yes	Animalia	Chordata	Mammalia	Rodentia	Diverse/Unspecified	Diverse/Unspecified	Diverse/Unspecified		mice	Terrestrial	Terrestrial	homes	12	other	NA	Y	Europe	United Kingdom		England/Wales/Scotland	Country	Year	Year	2010	Unspecified	2010	2010	Potentially ongoing	17875830			3.10494e+07	2.86125e+07	17875830	3.10494e+07	2.86125e+07	GBP	2010
IC_2.1_6666	SC1610		Cusack2009	The Economics of Invasive Species	Cusack, Chris, Michael Harte, and Samuel Chan	The prevention, eradication, and control of invasive species is an economic and policy issue and has less to do with biology and ecology than many people involved in managing natural resources realize. Invasive species were introduced into the United States as a result of trade, commerce, and the fulfillment of cultural needs. Decisions about agricultural production, conversion of land from fores…	2009	English	Official report	NA	Yes	Animalia	Chordata	Mammalia	Rodentia	Muridae	Rattus	Rattus sp.		Diverse/Unspecified	Terrestrial	Terrestrial			other	NA	N	North America	United States of America		Diverse/Unspecified	Country	Unspecified	Year	Unspecified	Unspecified	2009	2009	Potentially ongoing	21200000			2.4136e+07	2.4136e+07	21200000	2.4136e+07	2.4136e+07	USD	2008
IC_2.1_6707	SC1660	TC	MarylandDNR2004	Potential Economic Losses Associated With Uncontrolled Nutria Populations in Maryland's Portion of the Chesapeake Bay	Maryland Department of Natural Resources	Nutria (Myocaster coypus) are non-native aquatic mammals that are having an unprecedented negative effect on the marshes and ecology of the Chesapeake Bay. Since their introduction in the 1930's, nutria populations have continued to expand. With their high reproductive rate and voracious appetite for marsh grasses and root mats, they are now damaging hundreds of acres of valuable wetlands each ye…	2004	English	Peer-reviewed article	NA	Yes	Animalia	Chordata	Mammalia	Rodentia	Myocastoridae	Myocastor	Myocastor coypus		nutria	Aquatic	Semi-aquatic	Maryland's portion of the Chesapeake Bay; emergent wetlands	11	other	NA	N	North America	United States of America	Maryland	Chesapeake Bay	Unit (part of bay)	"over the next 50 years"	Year	2002	2051	2002	2051	Potentially ongoing	28136121			3.65131e+07	3.65131e+07	28136121	3.65131e+07	3.65131e+07	USD	2004
IC_2.1_6718	SC1675	Go	93	The economic cost of invasive non-native species on Great Britain	Williams et al.	The impact of Invasive Non-Native Species (INNS) can be manifold, ranging from loss of crops, damaged buildings, and additional production costs to the loss of livelihoods and ecosystem services. INNS are increasingly abundant in Great Britain and in Europe generally and their impact is rising. Hence, INNS are the subject of considerable concern in Great Britain, prompting the development of a No…	2010	English	Official report	NA	Yes	Animalia	Chordata	Mammalia	Rodentia	Muridae	Rattus	Rattus norvegicus		brown rat	Terrestrial	Terrestrial	homes	12	other	NA	Y	Europe	United Kingdom		England/Wales/Scotland	Country	Year	Year	2010	Unspecified	2010	2010	Potentially ongoing	31550189			5.4801e+07	5.04999e+07	31550189	5.4801e+07	5.04999e+07	GBP	2010
IC_2.1_6930	SC1935		Cusack2009	The Economics of Invasive Species	Cusack, Chris, Michael Harte, and Samuel Chan	The prevention, eradication, and control of invasive species is an economic and policy issue and has less to do with biology and ecology than many people involved in managing natural resources realize. Invasive species were introduced into the United States as a result of trade, commerce, and the fulfillment of cultural needs. Decisions about agricultural production, conversion of land from fores…	2009	English	Official report	NA	Yes	Animalia	Chordata	Mammalia	Rodentia	Muridae	Rattus	Rattus sp.		Diverse/Unspecified	Terrestrial	Terrestrial			other	NA	N	North America	United States of America		Diverse/Unspecified	Country	Unspecified	Year	Unspecified	Unspecified	2009	2009	Potentially ongoing	229000000			2.60714e+08	2.60714e+08	229000000	2.60714e+08	2.60714e+08	USD	2008
IC_2.1_6939	SC1947	TC	MarylandDNR2004	Potential Economic Losses Associated With Uncontrolled Nutria Populations in Maryland's Portion of the Chesapeake Bay	Maryland Department of Natural Resources	Nutria (Myocaster coypus) are non-native aquatic mammals that are having an unprecedented negative effect on the marshes and ecology of the Chesapeake Bay. Since their introduction in the 1930's, nutria populations have continued to expand. With their high reproductive rate and voracious appetite for marsh grasses and root mats, they are now damaging hundreds of acres of valuable wetlands each ye…	2004	English	Peer-reviewed article	NA	Yes	Animalia	Chordata	Mammalia	Rodentia	Myocastoridae	Myocastor	Myocastor coypus		nutria	Aquatic	Semi-aquatic	Maryland's portion of the Chesapeake Bay; emergent wetlands	11	other	NA	N	North America	United States of America	Maryland	Chesapeake Bay	Unit (part of bay)	"over the next 50 years"	Year	2002	2051	2002	2051	Potentially ongoing	251079302			3.25833e+08	3.25833e+08	251079302	3.25833e+08	3.25833e+08	USD	2004
IC_2.1_7251	SC2317		Wenger2018	Estimating realistic costs for strategic management planning of invasive species eradications on islands	Wenger et al	Environmental managers regularly face decisions about how to counteract threats. These decisions require an understanding of both the conservation benefits and economic costs of candidate actions. However, transparent frameworks for how to accurately calculate costs for management are rare. We worked with island managers in Australia to develop eradication protocols for six invasive species- four…	2018	English	Peer-reviewed article	NA	Yes	Animalia	Chordata	Mammalia	Rodentia	Muridae	Rattus	Rattus rattus		Black rat	Terrestrial	Terrestrial			other	NA	Y	Oceania	Australia		Pilbara Islands	Unit (islands)	Unspecified	Unspecified	2018	Unspecified	2018		One-time	1.27343e+06	34134	2512717	966799	896189				AUD	2016
IC_2.1_7252	SC2318		Wenger2018	Estimating realistic costs for strategic management planning of invasive species eradications on islands	Wenger et al	Environmental managers regularly face decisions about how to counteract threats. These decisions require an understanding of both the conservation benefits and economic costs of candidate actions. However, transparent frameworks for how to accurately calculate costs for management are rare. We worked with island managers in Australia to develop eradication protocols for six invasive species- four…	2018	English	Peer-reviewed article	NA	Yes	Animalia	Chordata	Mammalia	Rodentia	Muridae	Mus	Mus musculus		House mouse	Terrestrial	Terrestrial			other	NA	Y	Oceania	Australia		Pilbara Islands	Unit (islands)	Unspecified	Unspecified	2018	Unspecified	2018		One-time	1421524	34272	2808776	1.07924e+06	1.00042e+06				AUD	2016
IC_2.1_7271	SC2339	TC	225	Preventing extinctions: planning and undertaking invasive rodent eradication from Pinzon Island, Galapagos	Rueda D, Carrion V., Castaño P.A., Cunninghame F., Fisher P., Hagen E., Ponder J.B., Riekena C.A., Sevilla C., Shield H., Will D. and Campbell K.J.		2019	English	Peer-reviewed article	NA	No	Animalia	Chordata	Mammalia	Rodentia	Muridae	Rattus	Rattus rattus		black rat	Terrestrial	Terrestrial			other	Y	Y	South America	Ecuador	Galapagos Islands	Galapagos- Pinzon	Site	2012	Year	2012	2012	2012	2012	One-time	101000			106273		101000	106273		USD	2013
IC_3.0_24	SC2398	GS	GER1	Economic Impact of the Spread of Alien Species in Germany (R+D Project 201 86 211 (UFOPLAN))	Reinhardt et al	In dem Entwurf einer European Strategy on Invasive Alien Species T-PVS (2002) 8 werden verstärkte Forschungsaktivitäten der Mitgliedstaaten angeregt, die nicht nur auf den biologischen Bereich oder Bekämpfung invasiver Arten beschränkt bleiben, sondern auch die Bewertung der Auswirkungen auf Gesundheitswesen und Volkswirtschaft untersuchen sollen. Derartige Studien wurden bisher nur für die Verei…	2003	German	Official report	NA	Yes	Animalia	Chordata	Mammalia	Rodentia	Cricetidae	Ondatra	Ondatra zibethicus		Muskrat	Semi-aquatic	Semi-aquatic			other	N	NA	Europe	Germany	Germany	Germany	Country	2003	Year	2003	2003	2003	2003	One-time	19350000	12900000	21500000	2.58664e+07	2.26386e+07	17200000	2.58664e+07	2.26386e+07	EUR	2003
IC_3.0_76	SC2451		86	Environmental and Economic Costs of Nonindigenous Species in the United States	Pimentel et al		2000	English	Peer-reviewed article	Mack2000	Yes	Animalia	Chordata	Mammalia	Rodentia	Muridae	Rattus	Rattus sp.		Rats	Terrestrial	Terrestrial			other	N	N	North America	United States of America	Diverse/Unspecified	USA	Country	2000	Year	2000	2004	2000	2004	Potentially ongoing	19000000000			2.70457e+10		19000000000	2.70457e+10		USD	2000
IC_3.0_139	SC2517	WoS	13244	Update on the environmental and economic costs associated with alien-invasive species in the United States	Pimentel et al		2005	English	Peer-reviewed article	NA	Yes	Animalia	Chordata	Mammalia	Rodentia	Muridae	Rattus	Rattus sp.		Rats	Terrestrial	Terrestrial			other	N	N	North America	United States of America	Diverse/Unspecified	USA	Country	2005	Year	2005	2006	2005	2005	Potentially ongoing	19000000000			2.38478e+10		19000000000	2.38478e+10		USD	2005
IC_4.0_39	SC27-MX8	TC	MX8	Diagnóstico de especies exóticas invasoras en las 8 Reservas de la Biosfera y Áreas Naturales Protegidas (ANP) insulares seleccionadas, a fin de establecer actividades para el manejo de las mismas invasoras.	Aguirre-Muñoz et al.	Propuesta de las actividades necesarias de manejo de EEI durante la FSP en los sitios de demostración seleccionados, propuesta para las actividades durante el FSP para promover la replicación de los proyectos piloto en otros sitios, descripción de las capacidades de gestión de EEI en los sitios piloto seleccionados.	2013	Spanish	Report	Ziller & García-Martínez, 2019 (MX8_a)	Yes	Animalia	Chordata	Mammalia	Rodentia	Cricetidae	Peromyscus	Peromyscus eremicus		Mouse	Terrestrial	Terrestrial		3	other	Y	Y	North America	Mexico	Colima	Islas del Archipielago de San Benito	Site	2014	Year	2014	2014	2014	2014	One-time	390000			410362		390000	410362		USD	2013
IC_4.0_45	SC33-MX8	TC	MX8	Diagnóstico de especies exóticas invasoras en las 8 Reservas de la Biosfera y Áreas Naturales Protegidas (ANP) insulares seleccionadas, a fin de establecer actividades para el manejo de las mismas invasoras.	Aguirre-Muñoz et al.	Propuesta de las actividades necesarias de manejo de EEI durante la FSP en los sitios de demostración seleccionados, propuesta para las actividades durante el FSP para promover la replicación de los proyectos piloto en otros sitios, descripción de las capacidades de gestión de EEI en los sitios piloto seleccionados.	2013	Spanish	Report	Ziller & García-Martínez, 2019 (MX8_a)	Yes	Animalia	Chordata	Mammalia	Rodentia	Muridae	Rattus	Rattus rattus		Black rat	Terrestrial	Terrestrial	Mangroves & evergreen forest	8	other	Y	Y	North America	Mexico	Quintana Roo	Banco Chinchorro	Site	2015	Year	2015	2015	2015	2015	One-time	835000			878595		835000	878595		USD	2013
IC_4.0_66	SC8-JP24	TC	JP_24	国⽴公園等⺠間活⽤特定⾃然環境保全活動 (グリー ンワーカー)事業費	JUDGIT!		2019	Japanese	Web page	Ministry of the Environment (badget databese)	Yes	Animalia	Chordata	Mammalia	Rodentia	Muridae	Rattus	Rattus norvegicus		Norway rat	Terrestrial	Terrestrial	Island forest	1	other	Y	Y	Asia	Japan	Miyagi	Ashi-shima Island	Site	2016	Year	2016	2017	2016	2017	One-time	6000000			56325.4	58072.7	6000000	56325.4	58072.7	JPY	2016
IC_4.0_95	SC37-JP24	TC	JP_24	国⽴公園等⺠間活⽤特定⾃然環境保全活動 (グリー ンワーカー)事業費	JUDGIT!		2019	Japanese	Web page	Ministry of the Environment (badget databese)	Yes	Animalia	Chordata	Mammalia	Rodentia	Muridae	Rattus	Rattus norvegicus		Norway rat	Terrestrial	Terrestrial	Island forest	1	other	Y	Y	Asia	Japan	Miyagi	Ashi-shima Island	Site	2017	Year	2017	2018	2017	2018	One-time	1000000			8915.35	9514.58	1000000	8915.35	9514.58	JPY	2017
IC_4.0_148	SC90-JP25	TC	JP_25	⾃然公園等事業費	JUDGIT!		2019	Japanese	Web page	Ministry of the Environment (badget databese)	Yes	Animalia	Chordata	Mammalia	Rodentia	Muridae	Rattus	Rattus rattus		Black rat	Terrestrial	Terrestrial	Island forest	1	other	Y	Y	Asia	Japan	Tokyo, Ogasawara Village	Ani-jima Island	Site	2014	Year	2014	2015	2014	2015	One-time	40000000			390925	401899	40000000	390925	401899	JPY	2014
IC_4.0_151	SC93-JP25	TC	JP_25	⾃然公園等事業費	JUDGIT!		2019	Japanese	Web page	Ministry of the Environment (badget databese)	Yes	Animalia	Chordata	Mammalia	Rodentia	Muridae	Rattus	Rattus rattus		Black rat	Terrestrial	Terrestrial	Island forest	1	other	Y	Y	Asia	Japan	Tokyo, Ogasawara Village	Ani-jima Island	Site	2015	Year	2015	2016	2015	2016	One-time	22000000			187965	219892	22000000	187965	219892	JPY	2015
IC_4.0_170	SC112-JP28	TC	JP_28	⽇本の国⽴公園と世界遺産を活かした地域活性化推進費	JUDGIT!		2019	Japanese	Web page	Ministry of the Environment (badget databese)	Yes	Animalia	Chordata	Mammalia	Rodentia	Muridae	Rattus	Rattus rattus		Black rat	Terrestrial	Terrestrial	Island forest	1	other	Y	Y	Asia	Japan	Tokyo, Ogasawara Village	Ogasawara Islands	Site	2014	Year	2014	2015	2014	2015	One-time	4000000			39092.5	40189.9	4000000	39092.5	40189.9	JPY	2014
IC_4.0_173	SC115-JP28	TC	JP_28	⽇本の国⽴公園と世界遺産を活かした地域活性化推進費	JUDGIT!		2019	Japanese	Web page	Ministry of the Environment (badget databese)	Yes	Animalia	Chordata	Mammalia	Rodentia	Muridae	Rattus	Rattus norvegicus		Norway rat	Terrestrial	Terrestrial	Island forest	1	other	Y	Y	Asia	Japan	Hokkaido	Teuri Island	Site	2015	Year	2015	2016	2015	2016	One-time	1000000			8543.88	9995.08	1000000	8543.88	9995.08	JPY	2015
IC_4.0_175	SC117-JP28	TC	JP_28	⽇本の国⽴公園と世界遺産を活かした地域活性化推進費	JUDGIT!		2019	Japanese	Web page	Ministry of the Environment (badget databese)	Yes	Animalia	Chordata	Mammalia	Rodentia	Muridae	Rattus	Rattus norvegicus		Norway rat	Terrestrial	Terrestrial			other	Y	Y	Asia	Japan		Japan	Site	2015	Year	2015	2016	2015	2016	One-time	1000000			8543.88	9995.08	1000000	8543.88	9995.08	JPY	2015
IC_4.0_177	SC119-JP29	TC	JP_29	国指定⿃獣保護区管理強化費	JUDGIT!		2019	Japanese	Web page	Ministry of the Environment (badget databese)	Yes	Animalia	Chordata	Mammalia	Rodentia	Muridae	Rattus	Rattus rattus/Rattus norvegicus		Black rat or Norway rat	Terrestrial	Terrestrial	Island scrub	3	other	Y	Y	Asia	Japan	Tokyo, Ogasawara Village	Okinotorishima Island	Site	2014	Year	2014	2015	2014	2015	One-time	1000000			9773.13	10047.5	1000000	9773.13	10047.5	JPY	2014
IC_4.0_434	SC76_SP105	TC	SP_105	Mejora del conocimiento de los efectos de especies exóticas sobre la biodiversidad nativa y los ecosistemas, así como de sus vías de entrada, con el objetivo de adoptar las medidas de gestión oportunas.	Consejeria de Transicion Ecologica, Lucha contra el Cambio Climatico y Planificacion Territorial/Gobierno de Canarias		2020	Spanish	Official report	NA	Yes	Animalia	Chordata	Mammalia	Rodentia	Sciuridae	Atlantoxerus	Atlantoxerus getulus		NA	Terrestrial	Terrestrial			other	NA	Y	Africa	Spain	Canary Islands	Gran Canaria	Site	18/04/2016-30/11/2016	Year	2016	2016	2016	2016	One-time	6800			7687.27	10806.7	6800	7687.27	10806.7	EUR	2016
IC_4.0_502	SC1_DK1	Go	DeOkonomiske2014	Invasive arter, Kapitel 3 i Økonomi og Miljø 2014.	De Økonomiske Råd		2014	Danish	Report	Naturstyrelsen (2012);	Yes	Animalia	Chordata	Mammalia	Rodentia	Muridae	Rattus	Rattus norvegicus		Brown rat	Terrestrial	Terrestrial		12a	urban	N	NA	Europe	Denmark		Denmark	Country	Unspecified	Year	Unspecified	Unspecified	2014	2014	Potentially ongoing	89000000			1.64038e+07	1.25617e+07	89000000	1.64038e+07	1.25617e+07	DKK	2012
IC_4.0_503	SC2_DK2	Go	DeOkonomiske2014	Invasive arter, Kapitel 3 i Økonomi og Miljø 2014.	De Økonomiske Råd		2014	Danish	Report	Gren mfl. (2007); Miljøministeriet (2009)	Yes	Animalia	Chordata	Mammalia	Rodentia	Muridae	Rattus	Rattus norvegicus		Brown rat	Terrestrial	Terrestrial		12a	urban	N	NA	Europe	Denmark		Denmark	Country	Unspecified	Year	Unspecified	Unspecified	2014	2014	Potentially ongoing	184000000			3.39134e+07	2.59702e+07	184000000	3.39134e+07	2.59702e+07	DKK	2012
IC_4.0_538	SC37_DK37	Go	Strandberg2014	Vurdering af invasive arters forekomst og påvirkninger i Danmark	Strandberg, Beate		2014	Danish	Report	De Økonomiske Råd (2014)	Yes	Animalia	Chordata	Mammalia	Rodentia	Cricetidae	Ondatra	Ondatra zibethicus		Muskrat	Aquatic	Aquatic		11	other	NA	NA	Europe	Denmark		Denmark	Country	Unspecified	Year	Unspecified	Unspecified	2014	2014	Potentially ongoing	300000			55293.6	42342.8	300000	55293.6	42342.8	DKK	2012
IC_4.0_539	SC38_DK38	Go	Strandberg2014	Vurdering af invasive arters forekomst og påvirkninger i Danmark	Strandberg, Beate		2014	Danish	Report	De Økonomiske Råd (2014)	Yes	Animalia	Chordata	Mammalia	Rodentia	Cricetidae	Ondatra	Ondatra zibethicus		Muskrat	Aquatic	Aquatic		11	other	NA	NA	Europe	Denmark		Denmark	Country	Unspecified	Year	Unspecified	Unspecified	2014	2014	Potentially ongoing	500000			92156	70571.3	500000	92156	70571.3	DKK	2012
IC_4.0_542	SC41_DK41	Go	DeOkonomiske2014	Invasive arter, Kapitel 3 i Økonomi og Miljø 2014.	De Økonomiske Råd		2014	Danish	Report		Yes	Animalia	Chordata	Mammalia	Rodentia	Myocastoridae	Myocastor	Myocastor coypus		Coypu	Semi-aquatic	Semi-aquatic			other	NA	NA	Europe	Denmark		Denmark	Country	Unspecified	Year	Unspecified	Unspecified	2014	2014	Potentially ongoing	22000000			4.05486e+06	3.10514e+06	22000000	4.05486e+06	3.10514e+06	DKK	2012
IC_4.0_543	SC42_DK42	Go	DeOkonomiske2014	Invasive arter, Kapitel 3 i Økonomi og Miljø 2014.	De Økonomiske Råd		2014	Danish	Report		Yes	Animalia	Chordata	Mammalia	Rodentia	Myocastoridae	Myocastor	Myocastor coypus		Coypu	Semi-aquatic	Semi-aquatic			other	NA	NA	Europe	Denmark		Denmark	Country	Unspecified	Year	Unspecified	Unspecified	2014	2014	Potentially ongoing	19000000			3.50193e+06	2.68171e+06	19000000	3.50193e+06	2.68171e+06	DKK	2012
IC_4.0_552	SC51_DK51	Go	Strandberg2014	Vurdering af invasive arters forekomst og påvirkninger i Danmark	Strandberg, Beate		2014	Danish	Report	De Økonomiske Råd (2014)	Yes	Animalia	Chordata	Mammalia	Rodentia	Sciuridae	Sciurus	Sciurus carolinensis		Eastern gray squirrel	Terrestrial	Terrestrial			other	NA	NA	Europe	Denmark		Denmark	Country	Unspecified	Year	Unspecified	Unspecified	2014	2014	Potentially ongoing	2000000			368624	282285	2000000	368624	282285	DKK	2012
IC_4.0_553	SC52_DK52	Go	Strandberg2014	Vurdering af invasive arters forekomst og påvirkninger i Danmark	Strandberg, Beate		2014	Danish	Report	De Økonomiske Råd (2014)	Yes	Animalia	Chordata	Mammalia	Rodentia	Sciuridae	Sciurus	Sciurus carolinensis		Eastern gray squirrel	Terrestrial	Terrestrial			other	NA	NA	Europe	Denmark		Denmark	Country	Unspecified	Year	Unspecified	Unspecified	2014	2014	Potentially ongoing	8400000			1.54822e+06	1.1856e+06	8400000	1.54822e+06	1.1856e+06	DKK	2012
IC_4.0_558	SC57_DK57	Go	Strandberg2007	Statistik om rottebekæmpelse Meddelelse fra Miljøstyrelsens konsulenter i rottebekæmpelse	Strandberg, Beate		2007	Danish	Report	Weile, 2007	Yes	Animalia	Chordata	Mammalia	Rodentia	Muridae	Mus	Mus musculus		Hou/House mouse/brown rat	Terrestrial	Terrestrial			both	NA	NA	Europe	Denmark		271 municipalities in Denmark	Country	2005	Year	1990	2005	1990	2005	Potentially ongoing	60000000	58000000	62000000	1.25579e+07	8.78806e+06	60000000	1.25579e+07	8.78806e+06	DKK	2005
IC_4.0_669	SC2642	TC	Soubeyran2008	Espèces exotiques envahissantes dans les collectivités françaises d'outre mer Etat des lieux et recommandations	Soubeyran Y		2008	French	Report	NA	Yes	Animalia	Chordata	Mammalia	Rodentia	Muridae	Rattus	Rattus rattus		Black rat	Terrestrial	Terrestrial			other	NA	Y	Antarctic-Subantarctic	France		Ile Australia	Site	Unspecified	Year	Unspecified	Unspecified	2008	2008	One-time	150000			251166	193648	150000	251166	193648	EUR	2008
IC_4.0_762	SC2740	WoS	Wenger et al 2017	estimating realistic costs for strategic management planning of invasive species eradications on islands	Wenger SA et al	Environmental managers regularly face decisions about how to counteract threats. These decisions require an understanding of both the conservation benefits and economic costs of candidate actions. However, transparent frameworks for how to accurately calculate costs for management are rare. We worked with island managers in Australia to develop eradication protocols for six invasive speciesfour m…	2017	English	Peer-reviewed article	NA	Yes	Animalia	Chordata	Mammalia	Rodentia	Muridae	Rattus	Rattus rattus		Rat	Terrestrial	Terrestrial			other	NA	Y	Oceania	Australia	Western Australia	NA	Site	Unspecified	Period	Unspecified	Unspecified			Potentially ongoing	210792			161556	142663	210792	161556	142663	AUD	2017
IC_4.0_763	SC2741	WoS	Wenger et al 2017	estimating realistic costs for strategic management planning of invasive species eradications on islands	Wenger SA et al	Environmental managers regularly face decisions about how to counteract threats. These decisions require an understanding of both the conservation benefits and economic costs of candidate actions. However, transparent frameworks for how to accurately calculate costs for management are rare. We worked with island managers in Australia to develop eradication protocols for six invasive speciesfour m…	2017	English	Peer-reviewed article	NA	Yes	Animalia	Chordata	Mammalia	Rodentia	Muridae	Mus	Mus musculus		house mice	Terrestrial	Terrestrial			other	NA	Y	Oceania	Australia	Western Australia	NA	Site	Unspecified	Period	Unspecified	Unspecified			Potentially ongoing	216410			165862	146465	216410	165862	146465	AUD	2017
IC_4.0_868	SC2846	WoS	Pernas et al 2011	A summary of the current progress toward eradication of the Mexican gray squirrel (Sciurus aureogaster F. Cuvier, 1829) from Biscayne National Park, Florida, USA	Pernas AJ; Clark DW	In 2007, the US National Park Service (NPS) began an eradication programme against Mexican gray squirrels (Sciurus aureogaster) on islands within Biscayne National Park. Planning included the 2007 development of a management plan, efficacy monitoring, a resource management weapons training programme, and ground and aerial surveys to locate dreys (squirrel nests) for follow-on removal. Aerial surv…	2011	English	Book chapter	Derbridge et al 2016_Economic damage by invasive grey squirrels in europe	Yes	Animalia	Chordata	Mammalia	Rodentia	Sciuridae	Sciurus	Sciurus aureogaster		Mexican gray squirrel	Terrestrial	Terrestrial		1	other	Y	Y	North America	United States of America		Biscayne National Park	Site	2007-2011	Period	2007	2011	2007	2011	One-time	80000			87177.2	87177.2	16000	17435.4	17435.4	USD	2011
IC_4.0_869	SC2847	WoS	Enck 1989	Wildlife damage in electric substations in New York.	Enck JW	Wildlife managers have long been concerned with the damage wildlife can cause, especially to agricultural crops. However, one area which has received little research is the damage caused by wildlife to electric substations. Such research is needed because damage to electric substations increases operating costs of utilities and reduces reliability of service to customers. Six member utilities of …	1989	English	Conference proceedings	Derbridge et al 2016_Economic damage by invasive grey squirrels in europe	Yes	Animalia	Chordata	Mammalia	Rodentia	Sciuridae	Sciurus	Sciurus aureogaster		Mexican gray squirrel	Terrestrial	Terrestrial		12a	urban	N	N	North America	United States of America	New York	NA	Site	1977-1988	Period	1977	1988	1977	1988	One-time	10000000			1.9773e+07		833333	1.64775e+06		USD	1989
IC_4.0_870	SC2848	WoS	Broome et al 2000	An evaluation of the costs of grey squirrel bark stripping damage in British Woodlands Forestry	Broome A; Johnson A		2000	English	Report	Derbridge et al 2016_Economic damage by invasive grey squirrels in europe	No	Animalia	Chordata	Mammalia	Rodentia	Sciuridae	Sciurus	Sciurus aureogaster		Mexican gray squirrel	Terrestrial	Terrestrial		1	other	N	Y	Europe	United Kingdom		United Kingdom	Country	Unspecified	Unspecified	Unspecified	Unspecified			One-time	40000000			8.61487e+07	8.08432e+07				GBP	2000
IC_4.0_885	SC2863	WoS	Ydenberg et al 2019	damage to dykes and levees in the netherlands is extensive and increases with muskrat (ondatra zibethicus) density	Ydenberg RC; van Loon EE; Bos D; van Hemert H	The muskrat (Ondatra zibethicus) is an invasive species in the Netherlands. Its burrowing habits are alleged to threaten the integrity of the extensive water control infrastructure, posing a public safety hazard in this densely populated, low-lying country. A national control program currently traps and kills tens of thousands of muskrats each year. The costs (annually about € 35M) as well as con…	2019	English	Peer-reviewed article	NA	Yes	Animalia	Chordata	Mammalia	Rodentia	Cricetidae	Ondatra	Ondatra zibethicus		muskrat	Aquatic	Aquatic			other	N	N	Europe	Netherlands		Netherlands	Country	Unspecified	Year	Unspecified	Unspecified	2019	2019	Potentially ongoing	35000000			3.75666e+07	4.27201e+07	35000000	3.75666e+07	4.27201e+07	EUR	2019
IC_4.0_1121	SC3099	TC	Bomford2002	Non-indigenous vertebrates in Australia	Bomford & Hart		2002	English	Book chapter	NA	Yes	Animalia	Chordata	Mammalia	Rodentia	Muridae	Mus	Diverse/Unspecified		Mice	Terrestrial				other	NA	Y	Oceania	Australia	Diverse/Unspecified	Australia	Country	2002	Year	2002	2002	2002	2002	One-time	1.93907e+06			1.41424e+06	1.28552e+06	1.93907e+06	1.41424e+06	1.28552e+06	AUD	2018
IC_4.0_1122	SC3100	TC	Bomford2002	Non-indigenous vertebrates in Australia	Bomford & Hart		2002	English	Book chapter	NA	Yes	Animalia	Chordata	Mammalia	Rodentia	Muridae	Mus	Diverse/Unspecified		Mice	Terrestrial				other	NA	Y	Oceania	Australia	Diverse/Unspecified	Australia	Country	2002	Year	2002	2002	2002	2002	One-time	7.75628e+06			5.65696e+06	5.14209e+06	7.75628e+06	5.65696e+06	5.14209e+06	AUD	2018
IC_4.0_1123	SC3101	TC	Stenekes2017	Pest animal and weed management survey - National landholder survey results	Stenekes, N, Kancans, R and Binks, B		2017	English	Official report	NA	Yes	Animalia	Chordata	Mammalia	Rodentia	Diverse/Unspecified	Diverse/Unspecified	Diverse/Unspecified		Rodent	Terrestrial				other	NA	Y	Oceania	Australia	Diverse/Unspecified	Australia	Country	2016	Year	2016	2016	2016	2016	One-time	1.85579e+06			1.3535e+06	1.23031e+06	1.85579e+06	1.3535e+06	1.23031e+06	AUD	2018
IC_4.0_1124	SC3102	TC	Gong2009	The economic impacts of vertebrate pests in Australia	Gong et al.		2009	English	Official report	NA	Yes	Animalia	Chordata	Mammalia	Rodentia	Muridae	Mus	Diverse/Unspecified		Mice	Terrestrial				other		Y	Oceania	Australia	Queensland	NA	Site	2007-08	Period	2007	2008	2007	2008	One-time	2.75386e+06			2.0085e+06	1.82569e+06	1.37693e+06	1.00425e+06	912845	AUD	2018
IC_4.0_1125	SC3103	TC	Caughley1994	Impact of the 1993 mouse plague	Caughley et al.		1994	English	Book	NA	No	Animalia	Chordata	Mammalia	Rodentia	Muridae	Mus	Diverse/Unspecified		Mice	Terrestrial				other		Y	Oceania	Australia	SA	NA	Site	1993	Year	1993	1993	1993	1993	One-time	2.1824e+06			1.59171e+06	1.44684e+06	2.1824e+06	1.59171e+06	1.44684e+06	AUD	2018
IC_4.0_1126	SC3104	TC	Caughley1994	Impact of the 1993 mouse plague	Caughley et al.		1994	English	Book	NA	No	Animalia	Chordata	Mammalia	Rodentia	Muridae	Mus	Diverse/Unspecified		Mice	Terrestrial				other		Y	Oceania	Australia	Vic	NA	Site	1993	Year	1993	1993	1993	1993	One-time	310956			226792	206150	310956	226792	206150	AUD	2018
IC_4.0_1171	SC3149	TC	Gregory2014	Eradications of vertebrate pests in Australia: a review and guidelines for future best practice	Gregory et al.		2014	English	Official report	NA	Yes	Animalia	Chordata	Mammalia	Rodentia	Muridae	Rattus	Diverse/Unspecified		Rat	Terrestrial				other	NA	Y	Oceania	Australia	Diverse/Unspecified	Australia	Country	2014	Year	2014	2014	2014	2014	One-time	1.84956e+06			1.34896e+06	1.22618e+06	1.84956e+06	1.34896e+06	1.22618e+06	AUD	2018
IC_4.0_1172	SC3150	TC	Gregory2014	Eradications of vertebrate pests in Australia: a review and guidelines for future best practice	Gregory et al.		2014	English	Official report	NA	Yes	Animalia	Chordata	Mammalia	Rodentia	Muridae	Rattus	Diverse/Unspecified		Rat	Terrestrial				other		Y	Oceania	Australia	Tas	NA	Site	2014	Year	2014	2014	2014	2014	One-time	2.17543e+06			1.58663e+06	1.44222e+06	2.17543e+06	1.58663e+06	1.44222e+06	AUD	2018
IC_4.0_1240	SC3218	TC	McLeod2004	Counting the cost: impact of invasive animals in Australia 2004	McLeod		2004	English	Official report	NA	Yes	Animalia	Chordata	Mammalia	Rodentia	Muridae	Mus	Diverse/Unspecified		Mice	Terrestrial				other		Y	Oceania	Australia	Diverse/Unspecified	NA	Site	2004	Year	2004	2004	2004	2004	One-time	4.07436e+07			2.97159e+07	2.70113e+07	4.07436e+07	2.97159e+07	2.70113e+07	AUD	2018
IC_4.0_1241	SC3219	TC	Croft1995	A survey of the MIA mouse plague - at what cost?	Croft, D & Caughley, J		1995	English	Official report	NA	Yes	Animalia	Chordata	Mammalia	Rodentia	Muridae	Mus	Diverse/Unspecified		Mice	Terrestrial				other		Y	Oceania	Australia	NSW	NA	Site	1994	Year	1994	1994	1994	1994	One-time	1.06313e+07			7.75383e+06	7.04811e+06	1.06313e+07	7.75383e+06	7.04811e+06	AUD	2018
IC_4.0_1242	SC3220	TC	Mutze1995	Efficacy of strychnine baiting for controlling house mice during the 1993 mouse plague in South Australia	Mutze		1995	English	peer-reviewed article	NA	Yes	Animalia	Chordata	Mammalia	Rodentia	Muridae	Mus	Diverse/Unspecified		Mice	Terrestrial				other		Y	Oceania	Australia	SA	NA	Site	1993	Year	1993	1993	1993	1993	One-time	5.34901e+07			3.90124e+07	3.54617e+07	5.34901e+07	3.90124e+07	3.54617e+07	AUD	2018
IC_4.0_1243	SC3221	TC	Caughley1994	Impact of the 1993 mouse plague	Caughley et al.		1994	English	Book	NA	No	Animalia	Chordata	Mammalia	Rodentia	Muridae	Mus	Diverse/Unspecified		Mice	Terrestrial						Y	Oceania	Australia	SA	NA	Site	1993	Year	1993	1993	1993	1993	One-time	5.93384e+07			4.32778e+07	3.93388e+07	5.93384e+07	4.32778e+07	3.93388e+07	AUD	2018
IC_4.0_1244	SC3222	TC	Redhead1988	The PICA Strategy for the prevention of losses caused by plagues of Mus domesticus in rural Australia	Redhead & Singleton 1988		1988	English	peer-reviewed article	NA	Yes	Animalia	Chordata	Mammalia	Rodentia	Muridae	Mus	Diverse/Unspecified		Mice	Terrestrial				other		Y	Oceania	Australia	Vic	NA	Site	1984	Year	1984	1984	1984	1984	One-time	2.61747e+07			1.90902e+07	1.73527e+07	2.61747e+07	1.90902e+07	1.73527e+07	AUD	2018
IC_4.0_1245	SC3223	TC	Caughley1994	Impact of the 1993 mouse plague	Caughley et al.		1994	English	Book	NA	No	Animalia	Chordata	Mammalia	Rodentia	Muridae	Mus	Diverse/Unspecified		Mice	Terrestrial						Y	Oceania	Australia	Vic	NA	Site	1993	Year	1993	1993	1993	1993	One-time	1.14112e+06			832265	756516	1.14112e+06	832265	756516	AUD	2018
IC_4.0_1246	SC3224	TC	Caughley1994	Impact of the 1993 mouse plague	Caughley et al.		1994	English	Book	NA	No	Animalia	Chordata	Mammalia	Rodentia	Muridae	Mus	Diverse/Unspecified		Mice	Terrestrial						Y	Oceania	Australia	Vic	NA	Site	1993	Year	1993	1993	1993	1993	One-time	2.42488e+07			1.76856e+07	1.6076e+07	2.42488e+07	1.76856e+07	1.6076e+07	AUD	2018
IC_4.0_1298	SC3276	TC	Caughley1998	Managing vertebrate pests: rodents, Bureau of Resource Science, Canberra	Caughley et al.		1998	English	Book	NA	Yes	Animalia	Chordata	Mammalia	Rodentia	Muridae	Rattus	Diverse/Unspecified		Rat	Terrestrial						Y	Oceania	Australia	Queensland	NA	Site	1998	Year	1998	1998	1998	1998	One-time	412525			300871	273487	412525	300871	273487	AUD	2018
IC_4.0_1304	SC3282	TC	Bomford2002	Non-indigenous vertebrates in Australia	Bomford & Hart		2002	English	Book chapter	NA	Yes	Animalia	Chordata	Mammalia	Rodentia	Muridae	Mus	Diverse/Unspecified		Mice	Terrestrial				other	NA	Y	Oceania	Australia	Diverse/Unspecified	Australia	Country	2002	Year	2002	2002	2002	2002	One-time	2.42384e+06			1.7678e+06	1.6069e+06	2.42384e+06	1.7678e+06	1.6069e+06	AUD	2018
IC_4.0_1338	SC3316	TC	Caughley1994	Impact of the 1993 mouse plague	Caughley et al.		1994	English	Survey	NA	No	Animalia	Chordata	Mammalia	Rodentia	Muridae	Mus	Diverse/Unspecified		Mice	Terrestrial					N	Y	Oceania	Australia	Vic	NA	Site	1993	Year	1993	1993	1993	1993	One-time	499241			364116	330976	499241	364116	330976	AUD	2018
IC_4.0_1339	SC3317	TC	Caughley1994	Impact of the 1993 mouse plague	Caughley et al.		1994	English	Survey	NA	No	Animalia	Chordata	Mammalia	Rodentia	Muridae	Mus	Diverse/Unspecified		Mice	Terrestrial					N	Y	Oceania	Australia	SA	NA	Site	1993	Year	1993	1993	1993	1993	One-time	1.8258e+06			1.33162e+06	1.21042e+06	1.8258e+06	1.33162e+06	1.21042e+06	AUD	2018
IC_4.0_1342	SC3320	TC	Henzell1991	Benefits and costs of vertebrate pest control and the value of research	Henzell		1991	English	Book chapter	NA	Yes	Animalia	Chordata	Mammalia	Rodentia	Muridae	Mus	Diverse/Unspecified		Mice	Terrestrial				other	N	Y	Oceania	Australia	SA	NA	Site	1991	Year	1991	1991	1991	1991	One-time	3.88383e+06			2.83263e+06	2.57482e+06	3.88383e+06	2.83263e+06	2.57482e+06	AUD	2018
IC_4.0_1345	SC3323	TC	Pimentel2001	Economic and environmental threats of alien plant animal, and microbe invasions	Pimentel et al.		2001	English	Peer-reviewed article	NA	Yes	Animalia	Chordata	Mammalia	Rodentia	Muridae	Rattus	Diverse/Unspecified		Rat	Terrestrial				other	N	Y	Oceania	Australia	Diverse/Unspecified	Australia	Country	2001	Year	2001	2001	2001	2001	One-time	1947859069			1.42065e+09	1.29135e+09	1947859069	1.42065e+09	1.29135e+09	AUD	2018
IC_4.0_1348	SC3326	TC	Caughley1994	Impact of the 1993 mouse plague	Caughley et al.		1994	English	Survey	NA	No	Animalia	Chordata	Mammalia	Rodentia	Muridae	Mus	Diverse/Unspecified		Mice	Terrestrial					N	Y	Oceania	Australia	SA	NA	Site	1993	Year	1993	1993	1993	1993	One-time	1.19224e+06			869544	790401	1.19224e+06	869544	790401	AUD	2018
IC_4.0_1349	SC3327	TC	Caughley1994	Impact of the 1993 mouse plague	Caughley et al.		1994	English	Book	NA	No	Animalia	Chordata	Mammalia	Rodentia	Muridae	Mus	Diverse/Unspecified		Mice	Terrestrial					N	Y	Oceania	Australia	SA	NA	Site	1993	Year	1993	1993	1993	1993	One-time	2.37122e+06			1.72943e+06	1.57202e+06	2.37122e+06	1.72943e+06	1.57202e+06	AUD	2018
IC_4.0_1350	SC3328	TC	Caughley1994	Impact of the 1993 mouse plague	Caughley et al.		1994	English	Survey	NA	No	Animalia	Chordata	Mammalia	Rodentia	Muridae	Mus	Diverse/Unspecified		Mice	Terrestrial					N	Y	Oceania	Australia	SA	NA	Site	1993	Year	1993	1993	1993	1993	One-time	2.91435e+06			2.12555e+06	1.93209e+06	2.91435e+06	2.12555e+06	1.93209e+06	AUD	2018
IC_4.0_1351	SC3329	TC	Caughley1994	Impact of the 1993 mouse plague	Caughley et al.		1994	English	Survey	NA	No	Animalia	Chordata	Mammalia	Rodentia	Muridae	Mus	Diverse/Unspecified		Mice	Terrestrial					N	Y	Oceania	Australia	Vic	NA	Site	1993	Year	1993	1993	1993	1993	One-time	993529			724620	658668	993529	724620	658668	AUD	2018
IC_4.1_228	Schworeretal2014_1		Schworer et al 2014	Invasive species Management programs in Alaska A survey of statewide expenditures 2007 2011	Schworer T; Federer RN; Ferren HJ	Invasive species have already reduced biodiversity, damaged the environment, threatened human health, and created economic losses worldwide. Alaska, by contrast, had relatively few invasive species for most of the 20th century. But increased population and development in recent years have brought an influx of non-native species. However, the problem remains in its infancy, and Alaska still has th…	2014	English	Peer-reviewed article	NA	Yes	Animalia	Chordata	Mammalia	Rodentia	Muridae	Rattus	Rattus norvegicus		Norway Rat	Terrestrial	terrestrial				NA	Y	North America	United States of America	Alaska	Aleutian Island	Site	2007-2011	Period	2007	2011	2007	2011	One-time	5000000			5.17706e+06	5.17706e+06	1000000	1.03541e+06	1.03541e+06	USD	2014
IC_4.1_279	Bang_SAfrica	GS	Preston_etal2019	South Africa works towards eradicating introduced house mice from sub-Antarctic Marion Island: the largest island yet attempted for mice	Preston et al	House mice (Mus musculus) were introduced to South Africa’s sub-Antarctic Marion Island, the larger of the two Prince Edward Islands, by sealers in the early 19th century. Over the last two centuries they have greatly reduced the abundance of native invertebrates. Domestic cats (Felis catus) taken to the island in 1948 to control mice at the South African weather station soon turned feral, killin…	2019	English	Peer-reviewed article	NA	Yes	Animalia	Chordata	Mammalia	Rodentia	Muridae	Mus	Mus musculus		House mouse	Terrestrial	Terrestrial			other	Y	Y	Africa	South Africa		Marion Island	Site	2021	Year	2021	2021	2021	2021	One-time	2300000			2.2052e+06		2300000	2.2052e+06		USD	2021
IC_4.1_280	Bang_Gough_RSPB_1	Go	Kelly2016	Gough Island Restoration Programme	J Kelly		2016	English	Official report	NA	Yes	Animalia	Chordata	Mammalia	Rodentia	Muridae	Mus	Mus musculus		House mouse	Terrestrial	Terrestrial			other	Y	Y	Europe	United Kingdom		Gough Island	Site	2018-2019	Period	2018	2019	2018	2019	One-time	6100000			8.41162e+06	9.04721e+06	3050000	4.20581e+06	4.52361e+06	GBP	2016
IC_4.1_283	Bang_Gough_Parkes	Go	Parkes2018	A Feasibility Study for the Eradication of House Mice from Gough Island	Parkes	House mice Mus musculus were introduced to Gough Island some time in the 19th century, and are known to have adverse impacts on both terrestrial and marine birds and probably on invertebrates and plants. In April 2007, the Royal Society for the Protection of Birds commissioned Landcare Research to assess whether it would be feasible to eradicate mice from the 6,500 ha island, or if not, whether s…	2008	English	Official report	NA	Yes	Animalia	Chordata	Mammalia	Rodentia	Muridae	Mus	Mus musculus		House mouse	Terrestrial	Terrestrial			other	Y	Y	Europe	United Kingdom		Gough Island	Site	Unspecified	Period	2007	Unspecified	2007		One-time	1500000			3.13941e+06	2.43374e+06				GBP	2008
IC_4.1_285	Bang_Brown	Go	Brown2007	Preliminary Operational Plan For Rodent Eradication from Tristan da Cunha	Brown		2007	English	Official report	NA	Yes	Animalia	Chordata	Mammalia	Rodentia	Muridae	Rattus/Mus	Rattus rattus/Mus musculus		Ship Rat/House mouse	Terrestrial	Terrestrial			other	N	Y	Europe	United Kingdom		Tristan da Cunha	Site	July to October of any year	Year	2007	2007	2007	2007	One-time	2000000			4.73095e+06	3.32966e+06				GBP	2007
IC_4.1_295	Bang_Herrera_USD	GS	Herrera_etal2020	Mapping the status of the North American beaver invasion in the Tierra del Fuego archipelago	Herrera et al	Quantifying the presence and environmental impact of invasive species is the starting point for research on management and nature conservation. North American beavers (Castor canadensis) were introduced to Argentina from Canada in 1946, and the species has been identified as a major agent of environmental change in the Tierra del Fuego archipelago in the Anthropocene. We studied the invasion stat…	2020	English	Peer-reviewed article	NA	Yes	Animalia	Chordata	Mammalia	Rodentia	Castoridae	Castor	Castor canadensis		North American beaver	Aquatic	Semi-aquatic			other	N	Y	South America	Argentina/Chile		Tierra del Fuego	Site	2019	Year	2019	2019	2019	2019	One-time	1500			1438.17		1500	1438.17		USD	2019
IC_4.1_296	Bang_Herrera_GBP	GS	Herrera_etal2020	Mapping the status of the North American beaver invasion in the Tierra del Fuego archipelago	Herrera et al	Quantifying the presence and environmental impact of invasive species is the starting point for research on management and nature conservation. North American beavers (Castor canadensis) were introduced to Argentina from Canada in 1946, and the species has been identified as a major agent of environmental change in the Tierra del Fuego archipelago in the Anthropocene. We studied the invasion stat…	2020	English	Peer-reviewed article	NA	Yes	Animalia	Chordata	Mammalia	Rodentia	Castoridae	Castor	Castor canadensis		North American beaver	Aquatic	Semi-aquatic			other	N	Y	South America	Argentina/Chile		Tierra del Fuego	Site	2019	Year	2019	2019	2019	2019	One-time	5000			6119.01		5000	6119.01		GBP	2019
IC_4.1_297	Bang_Simeone	GS	Simeone&Soza-Amigo2014	Valoración económica del bosque nativo afectado por la introducción del castor americano en Tierra del Fuego	Simeone & Soza-Amigo 2014	How much is the economic value of native forest affected by the North American beaver in Tierra del Fuego? That was the question which led to determine the value given by society to forest resources affected by the introduction of the North American (or Canadian) beaver in conservation areas in Tierra del Fuego Province. The contingent valuation technique was applied and 396 persons of the econom…	2014	Spanish	Peer-reviewed article	NA	Yes	Animalia	Chordata	Mammalia	Rodentia	Castoridae	Castor	Castor canadensis		North American beaver	Aquatic	Semi-aquatic			other	N	Y	South America	Chile		Tierra del Fuego	Site	2011	Year	2011	2011	2011	2011	Potentially ongoing	4.86451e+06			10959.9		4.86451e+06	10959.9		CLP	2011
IC_4.1_313	Bang_Antipodes	Go	NZDepartmentConservation2016	Million dollar mouse - Eradicating mice from Antipodes	NZ Department of Conservation		2016	English	Poster	NA	Yes	Animalia	Chordata	Mammalia	Rodentia	Muridae	Mus	Mus musculus		House mouse	Terrestrial	Terrestrial	NA	6	other	Y	Y	Antarctic-Subantarctic/Oceania	New Zealand	Antipodes Islands	Antipodes Island Nature Reserve and World Heritage Area	Site	over 3 years 2015-2017	Period	2015	2017	2015	2017	One-time	3900000			2.81269e+06	2.72888e+06	1300000	937563	909627	NZD	2015
IC_4.1_318	Bang_Maud	GS	Kennedy&Broome2019	How do we prevent the obstacles to good island biosecurity from limiting our eradication ambitions?	Kennedy & Broome	Island pest eradication and biosecurity spring from the same imperative. Yet in practice biosecurity is often subordinated to the demands of eradication in planning processes so that it is not well prepared at the outset and is poorly sustained in the aftermath. Why is this when, by any logic, eradication should not proceed unless the means are in place to safeguard treated islands from renewed p…	2019	English	Peer-reviewed article	Broome et al 2019 House Mice on Islands: Management and Lessons from New Zealand	Yes	Animalia	Chordata	Mammalia	Rodentia	Muridae	Mus	Mus musculus		House mouse	Terrestrial	Terrestrial			other	Y	Y	Oceania	New Zealand		Maud Island	Site	2014	Year	2014	2014	2014	2014	One-time	200000			126332	133181	200000	126332	133181	NZD	2019
IC_4.1_319	Bang_titi_1	GS	McClelland_etal2011	The Rakiura Tītī Islands Restoration Project: community action to eradicate Rattus rattus and Rattus exulans for ecological restoration and cultural wellbeing	McClelland et al	In 2003, a non-profi t group, Ka Mate Nga Kiore, was set up to oversee the restoration of four Māori-owned islands off the south coast of Stewart Island, New Zealand. The fi rst step in the restoration was to eradicate ship rats (Rattus rattus) from three islands and Pacifi c rats (R. exulans) from another. The eradication was funded by the Command Oil Spill Trustee Council which managed the miti…	2011	English	Peer-reviewed article	NA	Yes	Animalia	Chordata	Mammalia	Rodentia	Muridae	Rattus	Rattus rattus/Rattus exulans		Ship rat/Pacific rat	Terrestrial	Terrestrial			other	Y	Y	Oceania	New Zealand		Rakiura Titi Islands	Site	2003	Year	2003	2003	2003	2003	One-time	359100			391317		359100	391317		USD	2011
IC_4.1_320	Bang_titi_2	GS	McClelland_etal2011	The Rakiura Tītī Islands Restoration Project: community action to eradicate Rattus rattus and Rattus exulans for ecological restoration and cultural wellbeing	McClelland et al	In 2003, a non-profi t group, Ka Mate Nga Kiore, was set up to oversee the restoration of four Māori-owned islands off the south coast of Stewart Island, New Zealand. The fi rst step in the restoration was to eradicate ship rats (Rattus rattus) from three islands and Pacifi c rats (R. exulans) from another. The eradication was funded by the Command Oil Spill Trustee Council which managed the miti…	2011	English	Peer-reviewed article	NA	Yes	Animalia	Chordata	Mammalia	Rodentia	Muridae	Rattus	Rattus rattus/Rattus exulans		Ship rat/Pacific rat	Terrestrial	Terrestrial			other	Y	Y	Oceania	New Zealand		Rakiura Titi Islands	Site	2003	Year	2003	2003	2003	2003	One-time	51300			55902.4		51300	55902.4		USD	2011
IC_4.1_321	Bang_titi_3	GS	McClelland_etal2011	The Rakiura Tītī Islands Restoration Project: community action to eradicate Rattus rattus and Rattus exulans for ecological restoration and cultural wellbeing	McClelland et al	In 2003, a non-profi t group, Ka Mate Nga Kiore, was set up to oversee the restoration of four Māori-owned islands off the south coast of Stewart Island, New Zealand. The fi rst step in the restoration was to eradicate ship rats (Rattus rattus) from three islands and Pacifi c rats (R. exulans) from another. The eradication was funded by the Command Oil Spill Trustee Council which managed the miti…	2011	English	Peer-reviewed article	NA	Yes	Animalia	Chordata	Mammalia	Rodentia	Muridae	Rattus	Rattus rattus/Rattus exulans		Ship rat/Pacific rat	Terrestrial	Terrestrial			other	Y	Y	Oceania	New Zealand		Rakiura Titi Islands	Site	2003	Year	2003	2003	2003	2003	One-time	51300			55902.4		51300	55902.4		USD	2011
IC_4.1_322	Bang_titi_4	GS	McClelland_etal2011	The Rakiura Tītī Islands Restoration Project: community action to eradicate Rattus rattus and Rattus exulans for ecological restoration and cultural wellbeing	McClelland et al	In 2003, a non-profi t group, Ka Mate Nga Kiore, was set up to oversee the restoration of four Māori-owned islands off the south coast of Stewart Island, New Zealand. The fi rst step in the restoration was to eradicate ship rats (Rattus rattus) from three islands and Pacifi c rats (R. exulans) from another. The eradication was funded by the Command Oil Spill Trustee Council which managed the miti…	2011	English	Peer-reviewed article	NA	Yes	Animalia	Chordata	Mammalia	Rodentia	Muridae	Rattus	Rattus rattus/Rattus exulans		Ship rat/Pacific rat	Terrestrial	Terrestrial			other	Y	Y	Oceania	New Zealand		Rakiura Titi Islands	Site	2003	Year	2003	2003	2003	2003	One-time	25650			27951.2		25650	27951.2		USD	2011
IC_4.1_323	Bang_titi_5	GS	McClelland_etal2011	The Rakiura Tītī Islands Restoration Project: community action to eradicate Rattus rattus and Rattus exulans for ecological restoration and cultural wellbeing	McClelland et al	In 2003, a non-profi t group, Ka Mate Nga Kiore, was set up to oversee the restoration of four Māori-owned islands off the south coast of Stewart Island, New Zealand. The fi rst step in the restoration was to eradicate ship rats (Rattus rattus) from three islands and Pacifi c rats (R. exulans) from another. The eradication was funded by the Command Oil Spill Trustee Council which managed the miti…	2011	English	Peer-reviewed article	NA	Yes	Animalia	Chordata	Mammalia	Rodentia	Muridae	Rattus	Rattus rattus/Rattus exulans		Ship rat/Pacific rat	Terrestrial	Terrestrial			other	Y	Y	Oceania	New Zealand		Rakiura Titi Islands	Site	2003	Year	2003	2003	2003	2003	One-time	20520			22361		20520	22361		USD	2011
IC_4.1_330	Bang_Marsden_6	TC	Wilmshurst2016	In one end out the other: using ancient dung to reconstruct the transformation of prehistoric island ecosystems by invasive rats	Wilmshurst		2016	English	Grant Database	NA	Yes	Animalia	Chordata	Mammalia	Rodentia	Muridae	Rattus	Rattus exulans		Pacific rat	Terrestrial	Terrestrial			other	N	Y	Oceania	New Zealand			Country	2016-2019	Period	2016	2019	2016	2019	Potentially ongoing	830000			590091	588255	207500	147523	147064	NZD	2016
IC_4.1_348	Bang_Samaniego_1	GS	Samaniego-Herrera_etal2017	Eradicating invasive rodents from wet and dry tropical islands in Mexico	Samaniego-Herrera et al	Eradications of invasive rodents from tropical is- lands have a lower success rate compared to temperate is- lands. In the tropics the wide range of physical and biological conditions results in a wide variety of island biomes, with unique challenges and windows of opportun- ity for rodent eradications. We describe and compare re- search and operational details of six successful eradications of i…	2017	English	Peer-reviewed article	NA	Yes	Animalia	Chordata	Mammalia	Rodentia	Muridae	Rattus/Mus	Rarrus rattus/Mus musculus		Ship rat/House mouse	Terrestrial	Terrestrial			other	Y	Y	North America	Mexico		3 islands - Arrecife Alacranes: Pajaros, Perez, Muertos	Site	2011	Year	2011	2011	2011	2011	One-time	356168			356168		356168	356168		USD	2017
IC_4.1_349	Bang_Samaniego_2	GS	Samaniego-Herrera_etal2017	Eradicating invasive rodents from wet and dry tropical islands in Mexico	Samaniego-Herrera et al	Eradications of invasive rodents from tropical is- lands have a lower success rate compared to temperate is- lands. In the tropics the wide range of physical and biological conditions results in a wide variety of island biomes, with unique challenges and windows of opportun- ity for rodent eradications. We describe and compare re- search and operational details of six successful eradications of i…	2017	English	Peer-reviewed article	NA	Yes	Animalia	Chordata	Mammalia	Rodentia	Muridae	Rattus	Rattus rattus		Ship rat	Terrestrial	Terrestrial	Mangroves & evergreen forest	8	other	Y	Y	North America	Mexico		3 islands - Banco Chinchorro: Cayo Norete Menor, Cayo Norte Mayor, Cayo Centro	Site	2012	Year	2015	2015	2015	2015	One-time	888783			888783		888783	888783		USD	2017
IC_4.1_356	Bang_Desecheo	GS	Shiels_etal2019	Trail cameras are a key monitoring tool for determining target and non-target bait-take during rodent removal operations: evidence from Desecheo Island rat eradication	Shiels et al	Eff orts to remove invasive rodents (e.g. Rattus spp. and Mus musculus) from islands often use toxicant-laced baits containing the anticoagulants brodifacoum or diphacinone. Rodenticide baits are generally delivered through aerial- or hand-broadcast, or in bait stations. These baits are not rodent-specifi c and are subject to non-target consumption or secondary exposure (e.g. an individual preyin…	2019	English	Peer-reviewed article	NA	Yes	Animalia	Chordata	Mammalia	Rodentia	Muridae	Rattus	Rattus rattus		Ship rat	Terrestrial	Terrestrial			other	N	Y	North America	United States of America	Puerto Rico	Desecheo Island	Site	2016	Year	2016	2016	2016	2016	One-time	7500			7190.86	7190.86	7500	7190.86	7190.86	USD	2019
IC_4.1_381	Bang_USInterior_7	Go	US_DepInterior2019	Interior announces $5 million to protect coral reefs and natural resources; combat invasive species in island areas	US Department of the Interior		2019	English	Online press release	NA	Yes	Animalia	Chordata	Mammalia	Rodentia	Muridae	Rattus	Diverse/Unspecified		Diverse/Unspecified	Terrestrial	Terrestrial			other	N	Y	Oceania/Pacific Islands	Palau		Ngemelis Island complex	Site	2019	Year	2019	2019	2019	2019	One-time	244756			234668		244756	234668		USD	2019
[truncated: 16 more columns]

## Sheet: Changes_Made
CostID	Column name changed	Original info	Changed information	Date of the change (m/d/y)	Observations	Contributors
550	Method_reliability_refined		Low	03/23/2022	Cost data assessed in the frame of the "Rodents" paper prepared by Diagne et al.	Christophe Diagne
674	Method_reliability_refined		Low	03/23/2022	Cost data assessed in the frame of the "Rodents" paper prepared by Diagne et al.	Christophe Diagne
678	Method_reliability_refined		Low	03/23/2022	Cost data assessed in the frame of the "Rodents" paper prepared by Diagne et al.	Christophe Diagne
NE3230	Method_reliability_refined		Low	03/23/2022	No estimation method provided, no reference provided.	Elena Angulo/Christophe Diagne
NE3230	Details		Pg 35. "Se calcula que los costos asociados con aproximadamente 250 millones de ratas en Estados Unidos ascienden a 19.000 millones de dólares al año". No estimation method provided, no reference provided.	03/23/2022	No estimation method provided, no reference provided.	Elena Angulo
173	Remove the whole entry			03/24/2022	Duplicate 173/Rod_LBM11. Cost ID 173 in 2014 says the cost will cost around 9 million (potential); while cost id Rod_LBM11 the doc 2019 says it actually costed in 2012 9,5 mill	Elena Angulo
550	Method_reliability_Explanation		Key details are missing to assess and understand the figures and methodology used to derive the costs provided in this paper	03/24/2022	Cost data assessed in the frame of the "Rodents" paper prepared by Diagne et al.	Christophe Diagne
674	Method_reliability_Explanation		Key details are missing to assess and understand the figures and methodology used to derive the costs provided in this paper	03/24/2022	Cost data assessed in the frame of the "Rodents" paper prepared by Diagne et al.	Christophe Diagne
678	Method_reliability_Explanation		The reference associated with this data is Pimentel et al. 2001. However, the publication year is said to be 2004. In addition, the data cannot be found in Pimentel et al. 2001.	03/24/2022	Cost data assessed in the frame of the "Rodents" paper prepared by Diagne et al.	Christophe Diagne
NE3230	Method_reliability_Explanation			03/24/2022	No estimation method provided, no reference provided.	Christophe Diagne
550	Method_reliability_Expert_Name		Christophe Diagne	03/24/2022		Christophe Diagne
674	Method_reliability_Expert_Name		Christophe Diagne	03/24/2022		Christophe Diagne
678	Method_reliability_Expert_Name		Christophe Diagne	03/24/2022		Christophe Diagne
NE3230	Method_reliability_Expert_Name			03/24/2022	Christophe Diagne/Elena Angulo	Christophe Diagne
Bang_Antipodes	HabitatVerbatim		NA	03/24/2022	Changes made by comparing with the same cost included by Jean/Elena, which was a duplicate (Bang_Antipodes/DPNZ2016_1), because Bang_Antipodes is a cost in v4.1 and DPNZ2016_1 of the rodent dataset is a new cost, we remove the new cost	Elena Angulo
Bang_Antipodes	Habitat		6	03/24/2022	Changes made by comparing with the same cost included by Jean/Elena, which was a duplicate (Bang_Antipodes/DPNZ2016_1), because Bang_Antipodes is a cost in v4.1 and DPNZ2016_1 of the rodent dataset is a new cost, we remove the new cost	Elena Angulo
Bang_Antipodes	Geographic_region	Oceania	Antarctic-Subantarctic/Oceania	03/24/2022	Changes made by comparing with the same cost included by Jean/Elena, which was a duplicate (Bang_Antipodes/DPNZ2016_1), because Bang_Antipodes is a cost in v4.1 and DPNZ2016_1 of the rodent dataset is a new cost, we remove the new cost	Elena Angulo
Bang_Antipodes	State|Province|Administrative_area		Antipodes Islands	03/24/2022	Changes made by comparing with the same cost included by Jean/Elena, which was a duplicate (Bang_Antipodes/DPNZ2016_1), because Bang_Antipodes is a cost in v4.1 and DPNZ2016_1 of the rodent dataset is a new cost, we remove the new cost	Elena Angulo
Bang_Antipodes	Location	Antipodes Island	Antipodes Island Nature Reserve and World Heritage Area	03/24/2022	Changes made by comparing with the same cost included by Jean/Elena, which was a duplicate (Bang_Antipodes/DPNZ2016_1), because Bang_Antipodes is a cost in v4.1 and DPNZ2016_1 of the rodent dataset is a new cost, we remove the new cost	Elena Angulo
Bang_Antipodes	Period_of_estimation	2012-2014	over 3 years 2015-2017	03/24/2022	Changes made by comparing with the same cost included by Jean/Elena, which was a duplicate (Bang_Antipodes/DPNZ2016_1), because Bang_Antipodes is a cost in v4.1 and DPNZ2016_1 of the rodent dataset is a new cost, we remove the new cost	Elena Angulo
Bang_Antipodes	Probable_starting_year	2012	2015	03/24/2022	Changes made by comparing with the same cost included by Jean/Elena, which was a duplicate (Bang_Antipodes/DPNZ2016_1), because Bang_Antipodes is a cost in v4.1 and DPNZ2016_1 of the rodent dataset is a new cost, we remove the new cost	Elena Angulo
Bang_Antipodes	Probable_ending_year	2014	2017	03/24/2022	Changes made by comparing with the same cost included by Jean/Elena, which was a duplicate (Bang_Antipodes/DPNZ2016_1), because Bang_Antipodes is a cost in v4.1 and DPNZ2016_1 of the rodent dataset is a new cost, we remove the new cost	Elena Angulo
Bang_Antipodes	Probable_starting_year_adjusted	2012	2015	03/24/2022	Changes made by comparing with the same cost included by Jean/Elena, which was a duplicate (Bang_Antipodes/DPNZ2016_1), because Bang_Antipodes is a cost in v4.1 and DPNZ2016_1 of the rodent dataset is a new cost, we remove the new cost	Elena Angulo
Bang_Antipodes	Probable_ending_year_adjusted	2014	2017	03/24/2022	Changes made by comparing with the same cost included by Jean/Elena, which was a duplicate (Bang_Antipodes/DPNZ2016_1), because Bang_Antipodes is a cost in v4.1 and DPNZ2016_1 of the rodent dataset is a new cost, we remove the new cost	Elena Angulo
Bang_Antipodes	Raw_cost_estimate_2017_USD_exchange_rate	2.77271e+06	2.81269e+06	03/24/2022	Changes made by comparing with the same cost included by Jean/Elena, which was a duplicate (Bang_Antipodes/DPNZ2016_1), because Bang_Antipodes is a cost in v4.1 and DPNZ2016_1 of the rodent dataset is a new cost, we remove the new cost	Elena Angulo
Bang_Antipodes	Raw_cost_estimate_2017_USD_PPP		2.72888e+06	03/24/2022	Changes made by comparing with the same cost included by Jean/Elena, which was a duplicate (Bang_Antipodes/DPNZ2016_1), because Bang_Antipodes is a cost in v4.1 and DPNZ2016_1 of the rodent dataset is a new cost, we remove the new cost	Elena Angulo
Bang_Antipodes	Cost_estimate_per_year_original_currency	1300000	1300000	03/24/2022	Changes made by comparing with the same cost included by Jean/Elena, which was a duplicate (Bang_Antipodes/DPNZ2016_1), because Bang_Antipodes is a cost in v4.1 and DPNZ2016_1 of the rodent dataset is a new cost, we remove the new cost	Elena Angulo
Bang_Antipodes	Cost_estimate_per_year_2017_USD_exchange_rate	924238	937563	03/24/2022	Changes made by comparing with the same cost included by Jean/Elena, which was a duplicate (Bang_Antipodes/DPNZ2016_1), because Bang_Antipodes is a cost in v4.1 and DPNZ2016_1 of the rodent dataset is a new cost, we remove the new cost	Elena Angulo
Bang_Antipodes	Cost_estimate_per_year_2017_USD_PPP		909627	03/24/2022	Changes made by comparing with the same cost included by Jean/Elena, which was a duplicate (Bang_Antipodes/DPNZ2016_1), because Bang_Antipodes is a cost in v4.1 and DPNZ2016_1 of the rodent dataset is a new cost, we remove the new cost	Elena Angulo
Bang_Antipodes	Applicable_year	2016	2015	03/24/2022	Changes made by comparing with the same cost included by Jean/Elena, which was a duplicate (Bang_Antipodes/DPNZ2016_1), because Bang_Antipodes is a cost in v4.1 and DPNZ2016_1 of the rodent dataset is a new cost, we remove the new cost	Elena Angulo
Bang_Antipodes	Type_of_applicable_year	Publication year	Effective	03/24/2022	Changes made by comparing with the same cost included by Jean/Elena, which was a duplicate (Bang_Antipodes/DPNZ2016_1), because Bang_Antipodes is a cost in v4.1 and DPNZ2016_1 of the rodent dataset is a new cost, we remove the new cost	Elena Angulo
Bang_Antipodes	Initial contributors_names	Thomas Bodey	Thomas Bodey/Jean Fantle-Lepczyk/Elena Angulo	03/24/2022	Changes made by comparing with the same cost included by Jean/Elena, which was a duplicate (Bang_Antipodes/DPNZ2016_1), because Bang_Antipodes is a cost in v4.1 and DPNZ2016_1 of the rodent dataset is a new cost, we remove the new cost	Elena Angulo
Bang_Antipodes	Double-checking	No	Yes	03/24/2022	Changes made by comparing with the same cost included by Jean/Elena, which was a duplicate (Bang_Antipodes/DPNZ2016_1), because Bang_Antipodes is a cost in v4.1 and DPNZ2016_1 of the rodent dataset is a new cost, we remove the new cost	Elena Angulo
SC2863	Remove the whole entry			03/24/2022	Duplicate NE4743/SC2863, remove SC cost that is not double checked, even if it is in a peer review article but there are no details about the cost. Details are in the NE cost	Elena Angulo/Christophe Diagne
105	Remove the whole entry			03/28/2022	Duplicate 105/213/381. Two costs 105/381 coming from the same document ref ID 292. Cost ID 105 used the "Net cost total" of $ 8485 while cost ID 381 used the "Gross total cost" of 9985$. Cost ID 213 comes from a review paper in 2006, and cost is "converted from the local currency to US$ at prevailing exchange rates and adjusted to 2003 prices". But should be also a duplicate as the eradication co…	Elena Angulo/Christophe Diagne
213	Remove the whole entry			03/28/2022	Duplicate 105/213/381. Two costs 105/381 coming from the same document ref ID 292. Cost ID 105 used the "Net cost total" of $ 8485 while cost ID 381 used the "Gross total cost" of 9985$. Cost ID 213 comes from a review paper in 2006, and cost is "converted from the local currency to US$ at prevailing exchange rates and adjusted to 2003 prices". But should be also a duplicate as the eradication co…	Elena Angulo/Christophe Diagne
381	HabitatVerbatim		All four islets of Rurima are capped with pohutukawa (Metrosideros excelsa), and have an understorey of ..	03/28/2022	Review duplicate Duplicate 105/213/381	Elena Angulo
381	Habitat		1	03/28/2022	Review duplicate Duplicate 105/213/381	Elena Angulo
381	Location	Rurima	Rurima Island	03/28/2022	Corrections made from comparing the Duplicates 105/381 --> Two costs of the same document ref ID 292. Cost ID 105 used the "Net cost total" of $ 8485 while cost ID 381 used the "Gross total cost" of 9985$. Remove the "nest cost total", cost ID 105	Elena Angulo
381	protectedArea		Y	03/28/2022	Corrections made from comparing the Duplicates 105/381 --> Two costs of the same document ref ID 292. Cost ID 105 used the "Net cost total" of $ 8485 while cost ID 381 used the "Gross total cost" of 9985$. Remove the "nest cost total", cost ID 105	Elena Angulo
106	Overlap		106/363	03/28/2022	Overlap 106/363. Kapiti island was successfully eradicated in 1996, only once. Broome is the author in both documents ref ID 299 and 13836. The cost are different because the currency is different, maybe also because the concepts included can be different.	Elena Angulo/Christophe Diagne
363	Overlap		106/363	03/28/2022	Overlap 106/363. Kapiti island was successfully eradicated in 1996, only once. Broome is the author in both documents ref ID 299 and 13836. The cost are different because the currency is different, maybe also because the concepts included can be different.	Elena Angulo/Christophe Diagne
SC465	Overlap		Scicar_Scot_Bry_1(SC465/SC817)	03/28/2022	Overlaps with new costs	Elena Angulo
SC817	Overlap		Scicar_Scot_Bry_1(SC465/SC817)	03/28/2022	Overlaps with new costs	Elena Angulo
SC33-MX8	Overlap		SC33-MX8/Bang_Samaniego_2	03/28/2022	MX8 reports eradication costs of the Center Island planned for 2015. Samaniego et al. Gives the eradication costs for the 3 islands (two northern island in 2012, the center island in 2015). However the costs are nearly similar.	Elena Angulo/Christophe Diagne
Bang_Samaniego_2	Overlap		SC33-MX8/Bang_Samaniego_2	03/28/2022	MX8 reports eradication costs of the Center Island planned for 2015. Samaniego et al. Gives the eradication costs for the 3 islands (two northern island in 2012, the center island in 2015). However the costs are nearly similar.	Elena Angulo/Christophe Diagne
SC33-MX8	Type_of_applicable_year	Effective	Publication year	03/29/2022	the cost is planned and will occur later, in 2015	Elena Angulo/Christophe Diagne
Bang_Samaniego_2	Probable_starting_year	2012	2015	03/29/2022	The cost ID Bang_Samaniego_2 describes when the eradication in Cayo Centro was made, that is in 2015	Elena Angulo/Christophe Diagne
Bang_Samaniego_2	Probable_ending_year	2012	2015	03/29/2022	The cost ID Bang_Samaniego_2 describes when the eradication in Cayo Centro was made, that is in 2015	Elena Angulo/Christophe Diagne
Bang_Samaniego_2	Probable_starting_year_adjusted	2012	2015	03/29/2022	The cost ID Bang_Samaniego_2 describes when the eradication in Cayo Centro was made, that is in 2015	Elena Angulo/Christophe Diagne
Bang_Samaniego_2	Probable_ending_year_adjusted	2012	2015	03/29/2022	The document describes the eradication of the northern islands in 2012, but in Cayo Centro it was made in 2015 . Only one month per eradication, we use the latest year 2015.	Elena Angulo/Christophe Diagne
Bang_Samaniego_2	Details	Cost breakdowns for specific expenditure are available.	Cost breakdowns for specific expenditure are available. Two islands were treated simultaneously in 2012, and a third island was treated in 2015. See Fig. 2 & Table 5 and also cost ID SC33-MX8	03/29/2022	The document describes the eradication of the northern islands in 2012, but in Cayo Centro it was made in 2015 . Only one month per eradication, we use the latest year 2015	Elena Angulo/Christophe Diagne
SC33-MX8	HabitatVerbatim		Mangroves & evergreen forest	03/29/2022	Review of the overlap SC33-MX8/Bang_Samaniego_2	Elena Angulo
Bang_Samaniego_2	HabitatVerbatim		Mangroves & evergreen forest	03/29/2022	Review of the overlap SC33-MX8/Bang_Samaniego_3	Elena Angulo
Bang_Samaniego_2	Habitat		8	03/29/2022	Review of the overlap SC33-MX8/Bang_Samaniego_4	Elena Angulo
181	Occurrence	Potentially ongoing	One-time	03/29/2022	Successful eradication, should be one time	Elena Angulo/Christophe Diagne
182	Occurrence	Potentially ongoing	One-time	03/29/2022	Successful eradication, should be one time	Elena Angulo/Christophe Diagne
184	Occurrence	Potentially ongoing	One-time	03/29/2022	Successful eradication, should be one time	Elena Angulo/Christophe Diagne
186	Occurrence	Potentially ongoing	One-time	03/29/2022	Successful eradication, should be one time	Elena Angulo/Christophe Diagne
188	Occurrence	Potentially ongoing	One-time	03/29/2022	Successful eradication, should be one time	Elena Angulo/Christophe Diagne
189	Occurrence	Potentially ongoing	One-time	03/29/2022	Successful eradication, should be one time	Elena Angulo/Christophe Diagne
190	Occurrence	Potentially ongoing	One-time	03/29/2022	Successful eradication, should be one time	Elena Angulo/Christophe Diagne
191	Occurrence	Potentially ongoing	One-time	03/29/2022	Successful eradication, should be one time	Elena Angulo/Christophe Diagne
192	Occurrence	Potentially ongoing	One-time	03/29/2022	Successful eradication, should be one time	Elena Angulo/Christophe Diagne
194	Occurrence	Potentially ongoing	One-time	03/29/2022	Successful eradication, should be one time	Elena Angulo/Christophe Diagne
195	Occurrence	Potentially ongoing	One-time	03/29/2022	Successful eradication, should be one time	Elena Angulo/Christophe Diagne
197	Occurrence	Potentially ongoing	One-time	03/29/2022	Successful eradication, should be one time	Elena Angulo/Christophe Diagne
203	Occurrence	Potentially ongoing	One-time	03/29/2022	Successful eradication, should be one time	Elena Angulo/Christophe Diagne
204	Occurrence	Potentially ongoing	One-time	03/29/2022	Successful eradication, should be one time	Elena Angulo/Christophe Diagne
205	Occurrence	Potentially ongoing	One-time	03/29/2022	Successful eradication, should be one time	Elena Angulo/Christophe Diagne
206	Occurrence	Potentially ongoing	One-time	03/29/2022	Successful eradication, should be one time	Elena Angulo/Christophe Diagne
207	Occurrence	Potentially ongoing	One-time	03/29/2022	Successful eradication, should be one time	Elena Angulo/Christophe Diagne
209	Occurrence	Potentially ongoing	One-time	03/29/2022	Successful eradication, should be one time	Elena Angulo/Christophe Diagne
211	Occurrence	Potentially ongoing	One-time	03/29/2022	Successful eradication, should be one time	Elena Angulo/Christophe Diagne
213	Occurrence	Potentially ongoing	One-time	03/29/2022	Successful eradication, should be one time	Elena Angulo/Christophe Diagne
214	Occurrence	Potentially ongoing	One-time	03/29/2022	Successful eradication, should be one time	Elena Angulo/Christophe Diagne
215	Occurrence	Potentially ongoing	One-time	03/29/2022	Successful eradication, should be one time	Elena Angulo/Christophe Diagne
217	Occurrence	Potentially ongoing	One-time	03/29/2022	Successful eradication, should be one time	Elena Angulo/Christophe Diagne
218	Occurrence	Potentially ongoing	One-time	03/29/2022	Successful eradication, should be one time	Elena Angulo/Christophe Diagne
183	Remove the whole entry			03/29/2022	Duplicate 103/183; Same eradication that is well explained in the doc of cost id 103 which is the original (1993). Cost ID183 converts the original currency to 2003 USD.	Elena Angulo/Christophe Diagne
103	Authors	Towns and Broome	Taylor & Thomas	03/29/2022	Review of the article as duplicated with 183	Elena Angulo/Christophe Diagne
103	Habitat		1	03/29/2022		Elena Angulo/Christophe Diagne
183	Habitat		1	03/29/2022		Elena Angulo/Christophe Diagne
103	HabitatVerbatim		forest of silver beech Nothofagusmenziesii and scrub	03/29/2022		Elena Angulo/Christophe Diagne
183	HabitatVerbatim		forest of silver beech Nothofagusmenziesii and scrub	03/29/2022		Elena Angulo/Christophe Diagne
SC925	Details		The eradication of black rats and actions taken to mitigate non-target impacts on Pinzon Island cost an estimated $1,501,000 (2013 US dollars). Cost breakdown estimates include planning ($101,000), implementation ($909,000), non-target species management ($101,000) and indirect costs ($390,000) (Holmes, et al., 2015)	03/29/2022	Review of duplicates	Elena Angulo
SC1070	Details		The eradication of black rats and actions taken to mitigate non-target impacts on Pinzon Island cost an estimated $1,501,000 (2013 US dollars). Cost breakdown estimates include planning ($101,000), implementation ($909,000), non-target species management ($101,000) and indirect costs ($390,000) (Holmes, et al., 2015)	03/29/2022	Review of duplicates	Elena Angulo
SC2339	Details		The eradication of black rats and actions taken to mitigate non-target impacts on Pinzon Island cost an estimated $1,501,000 (2013 US dollars). Cost breakdown estimates include planning ($101,000), implementation ($909,000), non-target species management ($101,000) and indirect costs ($390,000) (Holmes, et al., 2015)	03/29/2022	Review of duplicates	Elena Angulo
SC925	Type_of_cost	Indirect costs	Planning	03/29/2022	Review of duplicates	Elena Angulo/Christophe Diagne
SC925	Type_of_cost_merged	Unspecified	Management	03/29/2022	Review of duplicates	Elena Angulo/Christophe Diagne
SC925	Management_type	NA	Post-invasion_management	03/29/2022	Review of duplicates	Elena Angulo/Christophe Diagne
SC2339	Type_of_cost	Administration	Management (non-target species)	03/29/2022	Review of duplicates	Elena Angulo/Christophe Diagne
SC2339	Type_of_cost_merged	Management	Management	03/29/2022	Review of duplicates	Elena Angulo/Christophe Diagne
SC2339	Management_type	Post-invasion_management	Post-invasion_management	03/29/2022	Review of duplicates	Elena Angulo/Christophe Diagne
184	Overlap		184/366	03/29/2022	Cost ID 184/366 are estimates of eradication cost of the same island. Both costs come from reviews that probably included different concepts and used different conversion methods.	Elena Angulo/Christophe Diagne
366	Overlap		184/366	03/29/2022	Cost ID 184/366 are estimates of eradication cost of the same island. Both costs come from reviews that probably included different concepts and used different conversion methods.	Elena Angulo/Christophe Diagne
184	Species	Rattus sp.	Rattus norvegicus	03/29/2022	Change made following the comparison of the overlap between cost ID 184/366	Elena Angulo/Christophe Diagne
184	Common_name	Rats	Brown rat	03/29/2022	Change made following the comparison of the overlap between cost ID 184/366	Elena Angulo/Christophe Diagne
187	Remove the whole entry			03/29/2022	Duplicate 187/374. Cost ID 187 is a review from 2006 and made conversion to USD 2003. Cost ID 374 is the original report from 1995. Keep 374, remove 187	Elena Angulo/Christophe Diagne
374	Genus	Diverse/Unspecified	Rattus	03/29/2022	Review of Duplicate 187/374 and the document of 374.	Elena Angulo/Christophe Diagne
374	Species	Diverse/Unspecified	Rattus exulans	03/29/2022	Review of Duplicate 187/374 and the document of 374.	Elena Angulo/Christophe Diagne
374	Common_name	Rodents	Pacific rat	03/29/2022	Review of Duplicate 187/374 and the document of 374.	Elena Angulo/Christophe Diagne
374	Habitat		2	03/29/2022	Review of Duplicate 187/374 and the document of 374.	Elena Angulo
374	HabitatVerbatim		the forest vegetation was reduced to an open woodland (mostly of pohutukawa, Metrosideros excelsa) that lacked an understorey.	03/29/2022	Review of Duplicate 187/374 and the document of 374.	Elena Angulo
190	Overlap		190/378	03/29/2022	Overlap/duplicate 190/378. Both costs probably included different concepts and used different conversion methods	Elena Angulo/Christophe Diagne
378	Overlap		190/378	03/29/2022	Overlap/duplicate 190/378. Both costs probably included different concepts and used different conversion methods	Elena Angulo/Christophe Diagne
191	Overlap		191/379	03/29/2022	Overlap/duplicate 191/379. Both costs probably included different concepts and used different conversion methods	Elena Angulo/Christophe Diagne
379	Overlap		191/379	03/29/2022	Overlap/duplicate 191/379. Both costs probably included different concepts and used different conversion methods	Elena Angulo/Christophe Diagne
190	protectedArea		Y	03/29/2022	Search in https://www.protectedplanet.net/10468	Elena Angulo
191	protectedArea		Y	03/29/2022	Search in https://www.protectedplanet.net/10469	Elena Angulo
378	protectedArea		Y	03/29/2022	Search in https://www.protectedplanet.net/10470	Elena Angulo
379	protectedArea		Y	03/29/2022	Search in https://www.protectedplanet.net/10471	Elena Angulo
190	Habitat		1	03/29/2022	Review of the document MacFadden 1992 and the Overlap/duplicate 190/378	Elena Angulo
191	Habitat		1	03/29/2022	Review of the document MacFadden 1992 and the Overlap/duplicate 190/378	Elena Angulo
378	Habitat		1	03/29/2022	Review of the document MacFadden 1992 and the Overlap/duplicate 190/378	Elena Angulo
379	Habitat		1	03/29/2022	Review of the document MacFadden 1992 and the Overlap/duplicate 190/378	Elena Angulo
190	HabitatVerbatim		The forest canopy consists of red mapou (Myrsine australis), mahoe (Melicytus ramiflorus), with emergent pohutukawa (Metrosideros excelsa)	03/29/2022	Review of the document MacFadden 1992 and the Overlap/duplicate 190/378	Elena Angulo
191	HabitatVerbatim		The forest canopy consists of red mapou (Myrsine australis), mahoe (Melicytus ramiflorus), with emergent pohutukawa (Metrosideros excelsa)	03/29/2022	Review of the document MacFadden 1992 and the Overlap/duplicate 190/378	Elena Angulo
378	HabitatVerbatim		The forest canopy consists of red mapou (Myrsine australis), mahoe (Melicytus ramiflorus), with emergent pohutukawa (Metrosideros excelsa)	03/29/2022	Review of the document MacFadden 1992 and the Overlap/duplicate 190/378	Elena Angulo
379	HabitatVerbatim		The forest canopy consists of red mapou (Myrsine australis), mahoe (Melicytus ramiflorus), with emergent pohutukawa (Metrosideros excelsa)	03/29/2022	Review of the document MacFadden 1992 and the Overlap/duplicate 190/378	Elena Angulo
378	Period_of_estimation	Until 1989	October 1989	03/29/2022	Review of the document MacFadden 1992 and the Overlap/duplicate 190/378	Elena Angulo/Christophe Diagne
379	Period_of_estimation	Until 1989	November 1989	03/29/2022	Review of the document MacFadden 1992 and the Overlap/duplicate 190/378	Elena Angulo/Christophe Diagne
378	Time_range	Period	Year	03/29/2022	Review of the document MacFadden 1992 and the Overlap/duplicate 190/378	Elena Angulo/Christophe Diagne
379	Time_range	Period	Year	03/29/2022	Review of the document MacFadden 1992 and the Overlap/duplicate 190/378	Elena Angulo/Christophe Diagne
378	Probable_starting_year	Unspecified	1989	03/29/2022	Review of the document MacFadden 1992 and the Overlap/duplicate 190/378	Elena Angulo/Christophe Diagne
379	Probable_starting_year	Unspecified	1989	03/29/2022	Review of the document MacFadden 1992 and the Overlap/duplicate 190/378	Elena Angulo/Christophe Diagne
378	Probable_starting_year_adjusted	Unspecified	1989	03/29/2022	Review of the document MacFadden 1992 and the Overlap/duplicate 190/378	Elena Angulo/Christophe Diagne
379	Probable_starting_year_adjusted	Unspecified	1989	03/29/2022	Review of the document MacFadden 1992 and the Overlap/duplicate 190/378	Elena Angulo/Christophe Diagne
190	Species	Rattus sp.	Rattus exulans	03/29/2022	Review of Duplicate 190/378 and the document of 378.	Elena Angulo/Christophe Diagne
190	Common_name	Rodents	Polynesian rat	03/29/2022	Review of Duplicate 190/378 and the document of 378.	Elena Angulo/Christophe Diagne
191	Species	Rattus sp.	Rattus exulans	03/29/2022	Review of Duplicate 191/379 and the document of 379.	Elena Angulo/Christophe Diagne
191	Common_name	Rodents	Polynesian rat	03/29/2022	Review of Duplicate 191/379 and the document of 379.	Elena Angulo/Christophe Diagne
104	Remove the whole entry			03/29/2022	Duplicate 104/200/380, cost IDs 104 and 380 come from the same paper, cost ID 104 is net cost, while cost ID 380 is gross cost. Cost ID 200 comes from a review that converted costs in USD2003, remove cost ID 200 and 104	Elena Angulo/Christophe Diagne
200	Remove the whole entry			03/29/2022	Duplicate 104/200/380, cost IDs 104 and 380 come from the same paper, cost ID 104 is net cost, while cost ID 380 is gross cost. Cost ID 200 comes from a review that converted costs in USD2003, remove cost ID 200 and 104	Elena Angulo/Christophe Diagne
211	Remove the whole entry			03/29/2022	Duplicate 211/375. Cost ID 211 from a review (Martins et al. 2006) were cost is converted to USD2003; cost ID 375 is the original report - Towns et al 1994. Keep 375, remove 211	Elena Angulo/Christophe Diagne
380	protectedArea		Y	03/29/2023	Review of Duplicate 104/200/380	Elena Angulo
380	Habitat		2\3	03/29/2023	Review of Duplicate 104/200/380	Elena Angulo
380	HabitatVerbatim		Korapuki has been extensively burnt in the past leaving remnants of the original vegetation only on two rocky promontories. Species present in the remnants include milk tree (Paratrophis banksii), karaka (Corynocarpus laevigatus), kawakawa (Macropiper excelsum), karo (Pittosporum crassifolium), wharangi (Melicope ternata), and some native herbaceous plants. The rest of the island is covered by a …	03/29/2023	Review of Duplicate 104/200/380	Elena Angulo
375	protectedArea		Y	03/29/2023	Review of Duplicate 211/375.	Elena Angulo
375	Genus	Diverse/Unspecified	Rattus	03/29/2022	Review of the original paper to see the evaluate the duplicate 211/375. Cost ID 211 from a review (Martins et al. 2006) were cost is converted to USD2003; cost ID 375 is the original report - Towns et al 1994. Keep 375, remove 211	Elena Angulo/Christophe Diagne
375	Species	Diverse/Unspecified	Rattus exulans	03/29/2022	Review of the original paper to see the evaluate the duplicate 211/375. Cost ID 211 from a review (Martins et al. 2006) were cost is converted to USD2003; cost ID 375 is the original report - Towns et al 1994. Keep 375, remove 211	Elena Angulo/Christophe Diagne
375	Common_name	Rodents	Pacific rat	03/29/2022	Review of the original paper to see the evaluate the duplicate 211/375. Cost ID 211 from a review (Martins et al. 2006) were cost is converted to USD2003; cost ID 375 is the original report - Towns et al 1994. Keep 375, remove 211	Elena Angulo/Christophe Diagne
198	Remove the whole entry			03/29/2022	Overlap/duplicate 109/198. cost ID 109 comes from Taylor & thomas 1989 and is the original document, cost ID 198 comes from a review (martins et al 2006) and converted the cost to USD2003. then keep the 109, remove 198	Elena Angulo/Christophe Diagne
109	Probable_ending_year	1988	1986	03/29/2022	Review of the document to assess the overlap/duplicate 109/198.	Elena Angulo/Christophe Diagne
109	Probable_ending_year_adjusted	1988	1986	03/29/2022	Review of the document to assess the overlap/duplicate 109/198.	Elena Angulo/Christophe Diagne
109	Time_range	Period	Year	03/29/2022	Review of the document to assess the overlap/duplicate 109/198.	Elena Angulo/Christophe Diagne
109	Period_of_estimation	1986-1988	1986	03/29/2022	Review of the document to assess the overlap/duplicate 109/198.	Elena Angulo/Christophe Diagne
109	Raw_cost_estimate_original_currency	97500	65000	03/29/2022	Review of the document to assess the overlap/duplicate 109/198.	Elena Angulo/Christophe Diagne
109	protectedArea		Y	03/29/2022	Review of the document to assess the overlap/duplicate 109/198.	Elena Angulo
109	Habitat		1	03/29/2022	Review of the document to assess the overlap/duplicate 109/198.	Elena Angulo
109	HabitatVerbatim		Forest	03/29/2022	Review of the document to assess the overlap/duplicate 109/198.	Elena Angulo
359	Type_of_applicable_year	Effective	Publication year	03/29/2022	Review of the document Broome 2009, Table 2, to assess the overlap Cost ID 184/366 . We select the last column USD2009 for all the records of this document, as the column "actual" is difficult to understand.	Elena Angulo/Christophe Diagne
362	Type_of_applicable_year	Effective	Publication year	03/29/2022	Review of the document Broome 2009, Table 2, to assess the overlap Cost ID 184/366 . We select the last column USD2009 for all the records of this document, as the column "actual" is difficult to understand.	Elena Angulo/Christophe Diagne
363	Raw_cost_estimate_original_currency	536000	428200	03/29/2022	Review of the document Broome 2009, Table 2, to assess the overlap Cost ID 184/366 . We select the last column USD2009 for all the records of this document, as the column "actual" is difficult to understand.	Elena Angulo/Christophe Diagne
364	Raw_cost_estimate_original_currency	500000	387400	03/29/2022	Review of the document Broome 2009, Table 2, to assess the overlap Cost ID 184/366 . We select the last column USD2009 for all the records of this document, as the column "actual" is difficult to understand.	Elena Angulo/Christophe Diagne
365	Raw_cost_estimate_original_currency	178600	136500	03/29/2022	Review of the document Broome 2009, Table 2, to assess the overlap Cost ID 184/366 . We select the last column USD2009 for all the records of this document, as the column "actual" is difficult to understand.	Elena Angulo/Christophe Diagne
366	Raw_cost_estimate_original_currency	2520000	1868700	03/29/2022	Review of the document Broome 2009, Table 2, to assess the overlap Cost ID 184/366 . We select the last column USD2009 for all the records of this document, as the column "actual" is difficult to understand.	Elena Angulo/Christophe Diagne
367	Raw_cost_estimate_original_currency	249500	163200	03/29/2022	Review of the document Broome 2009, Table 2, to assess the overlap Cost ID 184/366 . We select the last column USD2009 for all the records of this document, as the column "actual" is difficult to understand.	Elena Angulo/Christophe Diagne
368	Raw_cost_estimate_original_currency	61500	39200	03/29/2022	Review of the document Broome 2009, Table 2, to assess the overlap Cost ID 184/366 . We select the last column USD2009 for all the records of this document, as the column "actual" is difficult to understand.	Elena Angulo/Christophe Diagne
366	protectedArea		Y	03/29/2023	Review of the overlap 184/366	Elena Angulo
362	Occurrence	Potentially ongoing	One-time	03/29/2022	Review of the document Broome 2009, Table 2, to assess the overlap Cost ID 184/366 . We select the last column USD2009 for all the records of this document, as the column "actual" is difficult to understand.	Elena Angulo/Christophe Diagne
363	Occurrence	Potentially ongoing	One-time	03/29/2022	Review of the document Broome 2009, Table 2, to assess the overlap Cost ID 184/366 . We select the last column USD2009 for all the records of this document, as the column "actual" is difficult to understand.	Elena Angulo/Christophe Diagne
364	Occurrence	Potentially ongoing	One-time	03/29/2022	Review of the document Broome 2009, Table 2, to assess the overlap Cost ID 184/366 . We select the last column USD2009 for all the records of this document, as the column "actual" is difficult to understand.	Elena Angulo/Christophe Diagne
365	Occurrence	Potentially ongoing	One-time	03/29/2022	Review of the document Broome 2009, Table 2, to assess the overlap Cost ID 184/366 . We select the last column USD2009 for all the records of this document, as the column "actual" is difficult to understand.	Elena Angulo/Christophe Diagne
366	Occurrence	Potentially ongoing	One-time	03/29/2022	Review of the document Broome 2009, Table 2, to assess the overlap Cost ID 184/366 . We select the last column USD2009 for all the records of this document, as the column "actual" is difficult to understand.	Elena Angulo/Christophe Diagne
367	Occurrence	Potentially ongoing	One-time	03/29/2022	Review of the document Broome 2009, Table 2, to assess the overlap Cost ID 184/366 . We select the last column USD2009 for all the records of this document, as the column "actual" is difficult to understand.	Elena Angulo/Christophe Diagne
368	Occurrence	Potentially ongoing	One-time	03/29/2022	Review of the document Broome 2009, Table 2, to assess the overlap Cost ID 184/366 . We select the last column USD2009 for all the records of this document, as the column "actual" is difficult to understand.	Elena Angulo/Christophe Diagne
107	Overlap		107/365/370	03/29/2022	Overlap 107/365/370. 3 cost ID for the same eradication, reported at different times and with different amounts	Elena Angulo/Christophe Diagne
365	Overlap		107/365/370	03/29/2022	Overlap 107/365/370. 3 cost ID for the same eradication, reported at different times and with different amounts	Elena Angulo/Christophe Diagne
370	Overlap		107/365/370	03/29/2022	Overlap 107/365/370. 3 cost ID for the same eradication, reported at different times and with different amounts	Elena Angulo/Christophe Diagne
107	Habitat		1	03/29/2022	Review of the overlap 107/365/370	Elena Angulo
365	Habitat		1	03/29/2022	Review of the overlap 107/365/370	Elena Angulo
370	Habitat		1	03/29/2022	Review of the overlap 107/365/370	Elena Angulo
107	HabitatVerbatim		Forest	03/29/2022	Review of the overlap 107/365/370	Elena Angulo
365	HabitatVerbatim		Forest	03/29/2022	Review of the overlap 107/365/370	Elena Angulo
370	HabitatVerbatim		Forest	03/29/2022	Review of the overlap 107/365/370	Elena Angulo
107	protectedArea		Y	03/29/2022	Review of the overlap 107/365/370	Elena Angulo
370	protectedArea		Y	03/29/2022	Review of the overlap 107/365/370	Elena Angulo
375	Period_of_estimation	September 1993-March 1994	Sept 1992 + 36 weeks of monitoring	03/29/2022	Review of the duplicate 211/375. Towns et al. 1994 say eradication began in sept 1992 + 36 weeks of monitoring	Elena Angulo
375	Probable_starting_year	1994	1992	03/29/2022	Review of the duplicate 211/375. Towns et al. 1994 say eradication began in sept 1992 + 36 weeks of monitoring	Elena Angulo
375	Probable_ending_year	1994	1992	03/29/2022	Review of the duplicate 211/375. Towns et al. 1994 say eradication began in sept 1992 + 36 weeks of monitoring	Elena Angulo
375	Probable_starting_year_adjusted	1994	1992	03/29/2022	Review of the duplicate 211/375. Towns et al. 1994 say eradication began in sept 1992 + 36 weeks of monitoring	Elena Angulo
375	Probable_ending_year_adjusted	1994	1992	03/29/2022	Review of the duplicate 211/375. Towns et al. 1994 say eradication began in sept 1992 + 36 weeks of monitoring	Elena Angulo

## Sheet: Rodentia subset
InvaCost_ID	Cost_ID	Repository	Reference_ID	Reference_title	Authors	Abstract	Publication_year	Language	Type_of_material	Previous_materials	Availability	Kingdom	Phylum	Class	Order	Family	Genus	Species	Subspecies	Common_name	Environment	Environment_IAS	HabitatVerbatim	Habitat	urbanArea	protectedArea	Island	Geographic_region	Official_country	State|Province|Administrative_area	Location	Spatial_scale	Period_of_estimation	Time_range	Probable_starting_year	Probable_ending_year	Probable_starting_year_adjusted	Probable_ending_year_adjusted	Occurrence	Raw_cost_estimate_original_currency	Min_Raw_cost_estimate_original_currency	Max_Raw_cost_estimate_original_currency	Raw_cost_estimate_2017_USD_exchange_rate	Raw_cost_estimate_2017_USD_PPP	Cost_estimate_per_year_original_currency	Cost_estimate_per_year_2017_USD_exchange_rate	Cost_estimate_per_year_2017_USD_PPP	Currency	Applicable_year
IC_1.0_25	25	TC	2	Counting the Cost: Impact of Invasive Animals in Australia	McLeod		2004	English	Official report	Rolfe, J., & Windle, J. (2014). Public preferences for controlling an invasive species in public and private spaces. Land Use Policy, 41, 1–10. https://doi.org/10.1016/j.landusepol.2014.04.013	Yes	Animalia	Chordata	Mammalia	Rodentia	Muridae	Mus	Mus musculus		House mouse	Terrestrial	Terrestrial			other		Y	Oceania	Australia		Diverse/Unspecified	Country	2004	Year	2004	Unspecified	2004	2004	Potentially ongoing	23110000			2.20559e+07	2.19486e+07	23110000	2.20559e+07	2.19486e+07	AUD	2004
IC_1.0_26	26	TC	360	Impact of the 1993 mouse plague	Caughley et al		1994	English	Book	McLeod, R. (2004). Counting the Cost: Impact of Invasive Animals in Australia, 2004. Canberra. Retrieved from https://www.pestsmart.org.au/wp-content/uploads/2010/03/CountingTheCost.pdf	No	Animalia	Chordata	Mammalia	Rodentia	Muridae	Mus	Mus musculus		House mouse	Terrestrial	Terrestrial			other		Y	Oceania	Australia		Diverse/Unspecified	Country	1993	Year	1993	Unspecified	1993	1993	Potentially ongoing	27000000			3.26447e+07	3.43193e+07	27000000	3.26447e+07	3.43193e+07	AUD	1994
IC_1.0_27	27	TC	441	Non-indigenous vertebrates in Australia	Bomford and Hart		2002	English	Book chapter	McLeod, R. (2004). Counting the Cost: Impact of Invasive Animals in Australia, 2004. Canberra. Retrieved from https://www.pestsmart.org.au/wp-content/uploads/2010/03/CountingTheCost.pdf	Yes	Animalia	Chordata	Mammalia	Rodentia	Muridae	Mus	Mus musculus		House mouse	Terrestrial	Terrestrial			other		Y	Oceania	Australia		Diverse/Unspecified	Country	2000	Year	2000	Unspecified	2000	2000	Potentially ongoing	500000			412638	542695	500000	412638	542695	AUD	2000
IC_1.0_28	28	TC	441	Non-indigenous vertebrates in Australia	Bomford and Hart		2002	English	Book chapter	McLeod, R. (2004). Counting the Cost: Impact of Invasive Animals in Australia, 2004. Canberra. Retrieved from https://www.pestsmart.org.au/wp-content/uploads/2010/03/CountingTheCost.pdf	Yes	Animalia	Chordata	Mammalia	Rodentia	Muridae	Mus	Mus musculus		House mouse	Terrestrial	Terrestrial			other		Y	Oceania	Australia		Diverse/Unspecified	Country	2000	Year	2000	Unspecified	2000	2000	Potentially ongoing	10000000			8.25276e+06	1.08539e+07	10000000	8.25276e+06	1.08539e+07	AUD	2000
IC_1.0_29	29	TC	441	Non-indigenous vertebrates in Australia	Bomford and Hart		2002	English	Book chapter	McLeod, R. (2004). Counting the Cost: Impact of Invasive Animals in Australia, 2004. Canberra. Retrieved from https://www.pestsmart.org.au/wp-content/uploads/2010/03/CountingTheCost.pdf	Yes	Animalia	Chordata	Mammalia	Rodentia	Muridae	Mus	Mus musculus		House mouse	Terrestrial	Terrestrial			other		Y	Oceania	Australia		Diverse/Unspecified	Country	2000	Year	2000	Unspecified	2000	2000	Potentially ongoing	2500000			2.06319e+06	2.71347e+06	2500000	2.06319e+06	2.71347e+06	AUD	2000
IC_1.0_38	38	TC	412	Managing Vertebrate Pests: Rodents. Canberra: Bureau of Resource Sciences	﻿Caughley et al		1998	English	Book chapter	McLeod, R. (2004). Counting the Cost: Impact of Invasive Animals in Australia, 2004. Canberra. Retrieved from https://www.pestsmart.org.au/wp-content/uploads/2010/03/CountingTheCost.pdf	Yes	Animalia	Chordata	Mammalia	Rodentia	Muridae	Rattus	Rattus rattus		Black rat	Terrestrial	Terrestrial			other		Y	Oceania	Australia		Diverse/Unspecified	Country	1998	Year	1998	Unspecified	1998	1998	Potentially ongoing	3000000			2.83396e+06	3.46933e+06	3000000	2.83396e+06	3.46933e+06	AUD	1998
IC_1.0_39	39	WoS	12049	Population control of coypu Myocastor coypus in Italy compared to eradication in UK: a cost-benefit analysis	Panzacchi et al		2007	English	Peer-reviewed article	NA	Yes	Animalia	Chordata	Mammalia	Rodentia	Myocastoridae	Myocastor	Myocastor coypus		Nutria	Semi-aquatic	Semi-aquatic			other			Europe	Italy		Diverse/Unspecified	Country	1995-2000	Period	1995	2000	1995	2000	One-time	935138			1.51509e+06	1.36422e+06	155856	252515	227371	EUR	2007
IC_1.0_40	40	WoS	12049	Population control of coypu Myocastor coypus in Italy compared to eradication in UK: a cost-benefit analysis	Panzacchi et al		2007	English	Peer-reviewed article	NA	Yes	Animalia	Chordata	Mammalia	Rodentia	Myocastoridae	Myocastor	Myocastor coypus		Nutria	Semi-aquatic	Semi-aquatic			other			Europe	Italy		Diverse/Unspecified	Country	1995-2000	Period	1995	2000	1995	2000	One-time	2614408			4.2358e+06	3.81402e+06	435735	705966	635670	EUR	2007
IC_1.0_41	41	WoS	12049	Population control of coypu Myocastor coypus in Italy compared to eradication in UK: a cost-benefit analysis	Panzacchi et al		2007	English	Peer-reviewed article	NA	Yes	Animalia	Chordata	Mammalia	Rodentia	Myocastoridae	Myocastor	Myocastor coypus		Nutria	Semi-aquatic	Semi-aquatic			other			Europe	Italy		Diverse/Unspecified	Country	2007	Year	2006	Unspecified	2006	2006	Potentially ongoing	1.0944e+07	9434465	12453494	1.77312e+07	1.59656e+07	1.0944e+07	1.77312e+07	1.59656e+07	EUR	2007
IC_1.0_42	42	WoS	12049	Population control of coypu Myocastor coypus in Italy compared to eradication in UK: a cost-benefit analysis	Panzacchi et al		2007	English	Peer-reviewed article	NA	Yes	Animalia	Chordata	Mammalia	Rodentia	Myocastoridae	Myocastor	Myocastor coypus		Nutria	Semi-aquatic	Semi-aquatic			other		Y	Europe	United Kingdom		East Anglia	Site	1981-1992	Period	1981	1992	1981	1992	One-time	5000000			8.10088e+06	8.32416e+06	416667	675073	693680	EUR	2007
IC_1.0_93	93	WoS	13141	Effectiveness of coypu control in small Italian wetland areas	Bertolino et al		2005	English	Peer-reviewed article	NA	Yes	Animalia	Chordata	Mammalia	Rodentia	Myocastoridae	Myocastor	Myocastor coypus		Nutria	Semi-aquatic	Semi-aquatic			other	Y		Europe	Italy		Natural Reserve of Valenza	Unit (Reserve)	1998-2000	Year	1998	2000	1998	2000	One-time	1518			2370.38	2228.07	1518	2370.38	2228.07	EUR	2005
IC_1.0_97	97	TC	401	Mammifères aquatiques et semi-aquatiques introduits en France. Risques et conséquences	Moutou		1997	French	Journal article	NA	Yes	Animalia	Chordata	Mammalia	Rodentia	Myocastoridae	Myocastor	Myocastor coypus		Nutria	Semi-aquatic	Semi-aquatic			other			Europe	France	Vendée	Vendée	Site	Unspecified	Year	Unspecified	Unspecified	1997	1997	Potentially ongoing	15000			4467.81	24889.5	15000	4467.81	24889.5	FRF	1994
IC_1.0_98	98	TC	394	Le ragondin	Micol		1990	French	Journal article	Moutou, F. (1997). Mammifères aquatiques et semi-aquatiques introduits en France. Risques et conséquences. Bulletin Français de La Pêche et de La Pisciculture, (344–345), 133–139. https://doi.org/10.1051/kmae:1997016	No	Animalia	Chordata	Mammalia	Rodentia	Myocastoridae	Myocastor	Myocastor coypus		Nutria	Semi-aquatic	Semi-aquatic			other			Europe	France	Maine-et-Loire	Maine-et-Loire	Site	1990	Year	1990	Unspecified	1990	1990	Potentially ongoing	700000			241168	1.27823e+06	700000	241168	1.27823e+06	FRF	1990
IC_1.0_100	100	WoS	13836	From small Maria to massive Campbell: forty years of rat eradications from New Zealand islands	Towns and Broome		2003	English	Peer-reviewed article	NA	Yes	Animalia	Chordata	Mammalia	Rodentia	Muridae	Rattus	Rattus norvegicus		Brown rat	Terrestrial	Terrestrial			other	Y	Y	Oceania	New Zealand		Korapuki Island	Unit (Ha)	1986	Year	1986	1986	1986	1986	One-time	198			231.445		198	231.445		NZD	1986
IC_1.0_101	101	WoS	13836	From small Maria to massive Campbell: forty years of rat eradications from New Zealand islands	Towns and Broome		2003	English	Peer-reviewed article	NA	Yes	Animalia	Chordata	Mammalia	Rodentia	Muridae	Rattus	Rattus norvegicus		Brown rat	Terrestrial	Terrestrial			other	Y	Y	Oceania	New Zealand		Mercury Island	Unit (Ha)	2003	Year	2003	2003	2003	2003	One-time	366			283.192	325.673	366	283.192	325.673	NZD	2003
IC_1.0_102	102	WoS	13836	From small Maria to massive Campbell: forty years of rat eradications from New Zealand islands	Towns and Broome		2003	English	Peer-reviewed article	NA	Yes	Animalia	Chordata	Mammalia	Rodentia	Muridae	Rattus	Rattus norvegicus		Brown rat	Terrestrial	Terrestrial			other	Y	Y	Oceania	New Zealand		Tuhua	Unit (Ha)	2003	Year	2003	2003	2003	2003	One-time	114			88.2074	101.439	114	88.2074	101.439	NZD	2003
IC_1.0_103	103	TC	489	Rats eradicated from rugged Breaksea Island (170 ha), Fiordland, New Zealand	Taylor & Thomas		1993	English	Peer-reviewed article	Towns, D. R., & Broome, K. G. (2003). From small Maria to massive Campbell: forty years of rat eradications from New Zealand islands. New Zealand Journal of Zoology, 30, 377–398. Retrieved from http://www.tandfonline.com/doi/pdf/10.1080/03014223.2003.9518348?needAccess=true	Yes	Animalia	Chordata	Mammalia	Rodentia	Muridae	Rattus	Rattus norvegicus		Brown rat	Terrestrial	Terrestrial	forest of silver beech Nothofagusmenziesii and scrub	1	other	Y	Y	Oceania	New Zealand		Breaksea Island	Site	21 days (1988)	Year	1988	1988	1988	1988	One-time	82117			91906.7	100127	82117	91906.7	100127	NZD	1990
IC_1.0_104	104	TC	292	Eradication campaigns against kiore (Rattus exulans) on Rurima Rocks and Korapuki Island, Northern New Zealand	McFadden and Towns		1991	English	Peer-reviewed article	Towns, D. R., & Broome, K. G. (2003). From small Maria to massive Campbell: forty years of rat eradications from New Zealand islands. New Zealand Journal of Zoology, 30, 377–398. Retrieved from http://www.tandfonline.com/doi/pdf/10.1080/03014223.2003.9518348UnknownneedAccess=true	Yes	Animalia	Chordata	Mammalia	Rodentia	Muridae	Rattus	Rattus exulans		Polynesian rat	Terrestrial	Terrestrial			other	Y	Y	Oceania	New Zealand		Korapuki Island	Unit (Ha)	1986	Year	1986	Unspecified	1986	1986	Potentially ongoing	3560			3696.15	4293.48	3560	3696.15	4293.48	NZD	1991
IC_1.0_105	105	TC	292	Eradication campaigns against kiore (Rattus exulans) on Rurima Rocks and Korapuki Island, Northern New Zealand	McFadden and Towns		1991	English	Peer-reviewed article	Towns, D. R., & Broome, K. G. (2003). From small Maria to massive Campbell: forty years of rat eradications from New Zealand islands. New Zealand Journal of Zoology, 30, 377–398. Retrieved from http://www.tandfonline.com/doi/pdf/10.1080/03014223.2003.9518348UnknownneedAccess=true	Yes	Animalia	Chordata	Mammalia	Rodentia	Muridae	Rattus	Rattus exulans		Polynesian rat	Terrestrial	Terrestrial			other	Y	Y	Oceania	New Zealand		Rurima Island	Site	Unspecified	Year	Unspecified	Unspecified	1991	1991	One-time	8485			8809.51	10233.2	8485	8809.51	10233.2	NZD	1991
IC_1.0_106	106	WoS	13836	From small Maria to massive Campbell: forty years of rat eradications from New Zealand islands	Towns and Broome		2003	English	Peer-reviewed article	NA	Yes	Animalia	Chordata	Mammalia	Rodentia	Muridae	Rattus	Rattus exulans/Rattus norvegicus		Polynesian rat/Brown rat	Terrestrial	Terrestrial			other	Y	Y	Oceania	New Zealand		Kapiti Island	Site	25 days	Year	Unspecified	Unspecified	2003	2003	One-time	500000			386875	444908	500000	386875	444908	NZD	2003
IC_1.0_107	107	WoS	13836	From small Maria to massive Campbell: forty years of rat eradications from New Zealand islands	Towns and Broome		2003	English	Peer-reviewed article	NA	Yes	Animalia	Chordata	Mammalia	Rodentia	Muridae	Rattus	Rattus exulans/Rattus norvegicus		Polynesian rat/Brown rat	Terrestrial	Terrestrial	Forest	1	other	Y	Y	Oceania	New Zealand		Tuhua	Site	10 days	Year	Unspecified	Unspecified	2003	2003	One-time	146000			112967	129913	146000	112967	129913	NZD	2003
IC_1.0_108	108	TC	293	Eradication campaigns against Rattus norvegicus on the Noises Islands, New Zealand, using brodifacoum and 1080	Moors		1985	English	Official report	Towns, D. R., & Broome, K. G. (2003). From small Maria to massive Campbell: forty years of rat eradications from New Zealand islands. New Zealand Journal of Zoology, 30, 377–398. Retrieved from http://www.tandfonline.com/doi/pdf/10.1080/03014223.2003.9518348UnknownneedAccess=true	No	Animalia	Chordata	Mammalia	Rodentia	Muridae	Rattus	Rattus norvegicus		Brown rat	Terrestrial	Terrestrial			other		Y	Oceania	New Zealand		Noises Islands	Unit (Ha)	1985	Year	1985	1985	1985	1985	One-time	760			855.93		760	855.93		NZD	1985
IC_1.0_109	109	TC	303	Eradication of Norway rats (Rattus norvegicus) from Hawea Island, Fiordland, using brodifacoum	Taylor and Thomas		1989	English	Peer-reviewed article	Towns, D. R., & Broome, K. G. (2003). From small Maria to massive Campbell: forty years of rat eradications from New Zealand islands. New Zealand Journal of Zoology, 30, 377–398. Retrieved from http://www.tandfonline.com/doi/pdf/10.1080/03014223.2003.9518348?needAccess=true McFadden, I., & Towns, D. (1991). Eradication campaigns against Kiore (Rattus exulans) on Rurima Rocks and Korapuki, Norther…	Yes	Animalia	Chordata	Mammalia	Rodentia	Muridae	Rattus	Rattus norvegicus		Brown rat	Terrestrial	Terrestrial	Forest	1	other	Y	Y	Oceania	New Zealand		Hawea Island	Site	1986	Year	1986	1986	1986	1986	One-time	65000			75979.5		65000	75979.5		NZD	1986
IC_1.0_110	110	WoS	462	Control of invasive rats on islands and priorities for future action	Duron et al		2017	English	Peer-reviewed article	NA	Yes	Animalia	Chordata	Mammalia	Rodentia	Muridae	Rattus	Rattus exulans/Rattus norvegicus/Rattus rattus		Polynesian rat/Black rat/Brown rat	Terrestrial	Terrestrial			other		Y	Diverse/Unspecified	Diverse/Unspecified		Islands	Site	2017	Year	2017	Unspecified	2017	2017	Potentially ongoing	17262			17262		17262	17262		USD	2017
IC_1.0_132	132	WoS	1396	Eradicating mammals on New Zealand island reserves: What is left to do?	Parkes et al		2017	English	Peer-reviewed article	NA	Yes	Animalia	Chordata	Mammalia	Rodentia	Muridae	Diverse/Unspecified	Diverse/Unspecified		Rodents	Terrestrial	Terrestrial			other	Y	Y	Oceania	New Zealand		Campbell Island/Rangitoto-Motutapu Islands/Raoul/Little Barrier and Hen Islands	Unit (Ha)	2016	Year	2016	Unspecified	2016	2016	Potentially ongoing	300			229.928		300	229.928		AUD	2017
IC_1.0_153	154	WoS	9740	Protecting islands from pest invasion: optimal allocation of biosecurity resources between quarantine and surveillance	Moore et al		2010	English	Peer-reviewed article	NA	Yes	Animalia	Chordata	Mammalia	Rodentia	Muridae	Rattus	Rattus rattus		Black rat	Terrestrial	Terrestrial			other	Y	Y	Oceania	Australia		Barrow Island	Site	2008	Year	2008	2008	2008	2008	One-time	1.05037e+06	96667	2004072	1.00307e+06	808503	1.05037e+06	1.00307e+06	808503	AUD	2008
IC_1.0_154	155	WoS	9740	Protecting islands from pest invasion: optimal allocation of biosecurity resources between quarantine and surveillance	Moore et al		2010	English	Peer-reviewed article	NA	Yes	Animalia	Chordata	Mammalia	Rodentia	Muridae	Rattus	Rattus rattus		Black rat	Terrestrial	Terrestrial			other	Y	Y	Oceania	Australia		Barrow Island	Site	Unspecified	Year	Unspecified	Unspecified	2010	2010	One-time	375278			358378	288863	375278	358378	288863	AUD	2008
IC_1.0_167	170	WoS	2388	Prioritizing eradication actions on islands: it's not all or nothing	Helmstedt et al		2016	English	Peer-reviewed article	NA	Yes	Animalia	Chordata	Mammalia	Rodentia	Muridae	Rattus	Rattus sp.		Rat	Terrestrial	Terrestrial			other		Y	Oceania	Australia		Hermite	Unit (10.2 km2)	Unspecified	Year	Unspecified	Unspecified	2016	2016	One-time	143890			109243	101337	143890	109243	101337	AUD	2016
IC_1.0_170	173	TC	307	Eradications of vertebrate pests in Australia	Gregory et al		2014	English	Official report	Helmstedt, K. J., Shaw, J. D., Bode, M., Terauds, A., Springer, K., Robinson, S. A., & Possingham, H. P. (2016). Prioritizing eradication actions on islands: it’s not all or nothing. Journal of Applied Ecology, 53(3), 733–741. https://doi.org/10.1111/1365-2664.12599 2388	Yes	Animalia	Chordata	Mammalia	Rodentia	Muridae	Rattus	Rattus sp.		Rats	Terrestrial	Terrestrial			other	Y	Y	Oceania	Australia		Lord Howe Island	Site	Unspecified	Year	Unspecified	Unspecified	2014	2014	One-time	9000000			8.40005e+06	6.41569e+06	9000000	8.40005e+06	6.41569e+06	AUD	2014
IC_1.0_172	176	WoS	9566	Long-term cost-effectiveness of coypu (Myocastor coypus) control in Piedmont (Italy)	Bertolino and Viterbi		2010	English	Peer-reviewed article	NA	Yes	Animalia	Chordata	Mammalia	Rodentia	Myocastoridae	Myocastor	Myocastor coypus		Nutria	Semi-aquatic	Semi-aquatic			other			Europe	Italy		Piedmont	Site	1997-2005	Period	1997	2005	1997	2005	One-time	336308			501186	489359	37367.6	55687.3	54373.2	EUR	2010
IC_1.0_173	177	WoS	9566	Long-term cost-effectiveness of coypu (Myocastor coypus) control in Piedmont (Italy)	Bertolino and Viterbi		2010	English	Peer-reviewed article	NA	Yes	Animalia	Chordata	Mammalia	Rodentia	Myocastoridae	Myocastor	Myocastor coypus		Nutria	Semi-aquatic	Semi-aquatic			other			Europe	Italy		Piedmont	Site	1997-2005	Year	1997	2005	1997	2005	One-time	34956			52093.5	50864.2	34956	52093.5	50864.2	EUR	2010
IC_1.0_174	178	TC	228	Population control of coypu Myocastor coypus in Italy compared to eradication in UK: a cost-benefit analysis	Panzacchi et al		2007	English	Peer-reviewed article	Bertolino, S., & Viterbi, R. (2010). Long-term cost-effectiveness of coypu (Myocastor coypus) control in Piedmont (Italy). Biological Invasions, 12(8), 2549–2558. https://doi.org/10.1007/s10530-009-9664-4	No	Animalia	Chordata	Mammalia	Rodentia	Myocastoridae	Myocastor	Myocastor coypus		Nutria	Semi-aquatic	Semi-aquatic			other			Europe	Italy		Diverse/Unspecified	Country	1995-2000	Period	1995	2000	1995	2000	One-time	10696583			1.73303e+07	1.56047e+07	1.78276e+06	2.88839e+06	2.60078e+06	EUR	2007
IC_1.0_176	181	WoS	12448	Costing eradications of alien mammals from islands	Martins et al		2006	English	Peer-reviewed article	NA	Yes	Animalia	Chordata	Mammalia	Rodentia	Muridae	Rattus	Rattus sp.		Rats	Terrestrial	Terrestrial			other	Y	Y	Africa	Seychelles		Bird	Site	1996	Year	1996	Unspecified	1996	1996	One-time	5169			6887.55		5169	6887.55		USD	2003
IC_1.0_177	182	WoS	12448	Costing eradications of alien mammals from islands	Martins et al		2006	English	Peer-reviewed article	NA	Yes	Animalia	Chordata	Mammalia	Rodentia	Muridae	Rattus	Rattus sp.		Rats	Terrestrial	Terrestrial			other	Y	Y	South America	United Kingdom		Falklands (Bottom)	Site	2001	Year	2001	Unspecified	2001	2001	One-time	3201			4265.25		3201	4265.25		USD	2003
IC_1.0_178	183	WoS	12448	Costing eradications of alien mammals from islands	Martins et al		2006	English	Peer-reviewed article	NA	Yes	Animalia	Chordata	Mammalia	Rodentia	Muridae	Rattus	Rattus sp.		Rats	Terrestrial	Terrestrial	forest of silver beech Nothofagusmenziesii and scrub	1	other	Y	Y	Oceania	New Zealand		Breaksea Island	Site	1990	Year	1990	Unspecified	1990	1990	One-time	48796			65019.4		48796	65019.4		USD	2003
IC_1.0_179	184	WoS	12448	Costing eradications of alien mammals from islands	Martins et al		2006	English	Peer-reviewed article	NA	Yes	Animalia	Chordata	Mammalia	Rodentia	Muridae	Rattus	Rattus norvegicus		Brown rat	Terrestrial	Terrestrial			other	Y	Y	Oceania	New Zealand		Campbell	Site	2003	Year	2003	Unspecified	2003	2003	One-time	1249726			1.66523e+06		1249726	1.66523e+06		USD	2003
IC_1.0_181	186	WoS	12448	Costing eradications of alien mammals from islands	Martins et al		2006	English	Peer-reviewed article	NA	Yes	Animalia	Chordata	Mammalia	Rodentia	Muridae	Rattus	Rattus sp.		Rats	Terrestrial	Terrestrial			other	Y	Y	Africa	Seychelles		Curieuse	Site	2000	Year	2000	Unspecified	2000	2000	One-time	67290			89662.1		67290	89662.1		USD	2003
IC_1.0_182	187	WoS	12448	Costing eradications of alien mammals from islands	Martins et al		2006	English	Peer-reviewed article	NA	Yes	Animalia	Chordata	Mammalia	Rodentia	Muridae	Rattus	Rattus sp.		Rats	Terrestrial	Terrestrial			other	Y	Y	Oceania	New Zealand		Cuvier	Site	1993	Year	1993	Unspecified	1993	1993	One-time	16968			22609.4		16968	22609.4		USD	2003
IC_1.0_183	188	WoS	12448	Costing eradications of alien mammals from islands	Martins et al		2006	English	Peer-reviewed article	NA	Yes	Animalia	Chordata	Mammalia	Rodentia	Muridae	Rattus	Rattus sp.		Rats	Terrestrial	Terrestrial			other	Y	Y	Africa	Seychelles		Denis Island	Site	2000	Year	2000	Unspecified	2000	2000	One-time	56994			75943		56994	75943		USD	2003
IC_1.0_184	189	WoS	12448	Costing eradications of alien mammals from islands	Martins et al		2006	English	Peer-reviewed article	NA	Yes	Animalia	Chordata	Mammalia	Rodentia	Muridae	Rattus	Rattus sp.		Rats	Terrestrial	Terrestrial			other		Y	South America	United Kingdom		Falklands (Double)	Site	2001	Year	2001	Unspecified	2001	2001	One-time	370			493.015		370	493.015		USD	2003
IC_1.0_185	190	WoS	12448	Costing eradications of alien mammals from islands	Martins et al		2006	English	Peer-reviewed article	NA	Yes	Animalia	Chordata	Mammalia	Rodentia	Muridae	Rattus	Rattus exulans		Polynesian rat	Terrestrial	Terrestrial	The forest canopy consists of red mapou (Myrsine australis), mahoe (Melicytus ramiflorus), with emergent pohutukawa (Metrosideros excelsa)	1	other	Y	Y	Oceania	New Zealand		Double Islands (Larger island)	Site	1989	Year	1989	Unspecified	1989	1989	One-time	3271			4358.52		3271	4358.52		USD	2003
IC_1.0_186	191	WoS	12448	Costing eradications of alien mammals from islands	Martins et al		2006	English	Peer-reviewed article	NA	Yes	Animalia	Chordata	Mammalia	Rodentia	Muridae	Rattus	Rattus exulans		Polynesian rat	Terrestrial	Terrestrial	The forest canopy consists of red mapou (Myrsine australis), mahoe (Melicytus ramiflorus), with emergent pohutukawa (Metrosideros excelsa)	1	other	Y	Y	Oceania	New Zealand		Double Islands (Smaller island)	Site	1989	Year	1989	Unspecified	1989	1989	One-time	1919			2557.02		1919	2557.02		USD	2003
IC_1.0_187	192	WoS	12448	Costing eradications of alien mammals from islands	Martins et al		2006	English	Peer-reviewed article	NA	Yes	Animalia	Chordata	Mammalia	Rodentia	Muridae	Rattus	Rattus sp.		Rats	Terrestrial	Terrestrial			other	Y	Y	Pacific Islands	United Kingdom		Pitcairn Islands (Ducie)	Site	1998	Year	1998	Unspecified	1998	1998	One-time	32191			42893.7		32191	42893.7		USD	2003
IC_1.0_189	194	WoS	12448	Costing eradications of alien mammals from islands	Martins et al		2006	English	Peer-reviewed article	NA	Yes	Animalia	Chordata	Mammalia	Rodentia	Muridae	Rattus	Rattus sp.		Rats	Terrestrial	Terrestrial			other	Y	Y	Africa	Mauritius		Flat	Site	1998	Year	1998	Unspecified	1998	1998	One-time	64381			85786		64381	85786		USD	2003
IC_1.0_190	195	WoS	12448	Costing eradications of alien mammals from islands	Martins et al		2006	English	Peer-reviewed article	NA	Yes	Animalia	Chordata	Mammalia	Rodentia	Muridae	Rattus	Rattus sp.		Rats	Terrestrial	Terrestrial			other		Y	Africa	Seychelles		Fregate	Site	2000	Year	2000	Unspecified	2000	2000	One-time	61916			82501.4		61916	82501.4		USD	2003
IC_1.0_192	197	WoS	12448	Costing eradications of alien mammals from islands	Martins et al		2006	English	Peer-reviewed article	NA	Yes	Animalia	Chordata	Mammalia	Rodentia	Muridae	Rattus	Rattus sp.		Rats	Terrestrial	Terrestrial			other		Y	Central America	Antigua and Barbuda		Green Island	Site	2001	Year	2001	Unspecified	2001	2001	One-time	16115			21472.8		16115	21472.8		USD	2003
IC_1.0_193	198	WoS	12448	Costing eradications of alien mammals from islands	Martins et al		2006	English	Peer-reviewed article	NA	Yes	Animalia	Chordata	Mammalia	Rodentia	Muridae	Rattus	Rattus sp.		Rats	Terrestrial	Terrestrial			other	Y	Y	Oceania	New Zealand		Hawea Island	Site	1986	Year	1986	Unspecified	1986	1986	One-time	36101			48103.6		36101	48103.6		USD	2003
IC_1.0_195	200	WoS	12448	Costing eradications of alien mammals from islands	Martins et al		2006	English	Peer-reviewed article	NA	Yes	Animalia	Chordata	Mammalia	Rodentia	Muridae	Rattus	Rattus sp.		Rats	Terrestrial	Terrestrial			other	Y	Y	Oceania	New Zealand		Korapuki Island	Site	1987	Year	1987	Unspecified	1987	1987	One-time	3858			5140.68		3858	5140.68		USD	2003
IC_1.0_198	203	WoS	12448	Costing eradications of alien mammals from islands	Martins et al		2006	English	Peer-reviewed article	NA	Yes	Animalia	Chordata	Mammalia	Rodentia	Muridae	Rattus	Rattus sp.		Rats	Terrestrial	Terrestrial			other	Y	Y	Oceania	New Zealand		Mokohinau	Site	1991	Year	1991	Unspecified	1991	1991	One-time	21621			28809.4		21621	28809.4		USD	2003
IC_1.0_199	204	WoS	12448	Costing eradications of alien mammals from islands	Martins et al		2006	English	Peer-reviewed article	NA	Yes	Animalia	Chordata	Mammalia	Rodentia	Muridae	Rattus	Rattus sp.		Rats	Terrestrial	Terrestrial			other	Y	Y	Oceania	New Zealand		Mou Waho	Site	1996	Year	1996	Unspecified	1996	1996	One-time	8243			10983.6		8243	10983.6		USD	2003
IC_1.0_200	205	WoS	12448	Costing eradications of alien mammals from islands	Martins et al		2006	English	Peer-reviewed article	NA	Yes	Animalia	Chordata	Mammalia	Rodentia	Muridae	Rattus	Rattus sp.		Rats	Terrestrial	Terrestrial			other		Y	Oceania	New Zealand		Otata	Site	1991	Year	1991	Unspecified	1991	1991	One-time	8208			10936.9		8208	10936.9		USD	2003
IC_1.0_201	206	WoS	12448	Costing eradications of alien mammals from islands	Martins et al		2006	English	Peer-reviewed article	NA	Yes	Animalia	Chordata	Mammalia	Rodentia	Muridae	Rattus	Rattus sp.		Rats	Terrestrial	Terrestrial			other		Y	South America	United Kingdom		Falklands (Outer)	Site	2001	Year	2001	Unspecified	2001	2001	One-time	895			1192.56		895	1192.56		USD	2003
IC_1.0_202	207	WoS	12448	Costing eradications of alien mammals from islands	Martins et al		2006	English	Peer-reviewed article	NA	Yes	Animalia	Chordata	Mammalia	Rodentia	Muridae	Rattus	Rattus sp.		Rats	Terrestrial	Terrestrial			other	Y	Y	Pacific Islands	United States of America		Palmyra Atoll	Site	2001	Year	2001	Unspecified	2001	2001	Potentially ongoing	111007			147914	147914	111007	147914	147914	USD	2003
IC_1.0_204	209	WoS	12448	Costing eradications of alien mammals from islands	Martins et al		2006	English	Peer-reviewed article	NA	Yes	Animalia	Chordata	Mammalia	Rodentia	Muridae	Rattus	Rattus sp.		Rats	Terrestrial	Terrestrial			other	Y	Y	Europe	United Kingdom		Ramsey	Site	2000	Year	2000	Unspecified	2000	2000	One-time	28972			38604.4		28972	38604.4		USD	2003
IC_1.0_206	211	WoS	12448	Costing eradications of alien mammals from islands	Martins et al		2006	English	Peer-reviewed article	NA	Yes	Animalia	Chordata	Mammalia	Rodentia	Muridae	Rattus	Rattus sp.		Rats	Terrestrial	Terrestrial			other	Y	Y	Oceania	New Zealand		Red Mercury	Site	1992	Year	1992	Unspecified	1992	1992	One-time	24126			32147.3		24126	32147.3		USD	2003
IC_1.0_208	213	WoS	12448	Costing eradications of alien mammals from islands	Martins et al		2006	English	Peer-reviewed article	NA	Yes	Animalia	Chordata	Mammalia	Rodentia	Muridae	Rattus	Rattus sp.		Rats	Terrestrial	Terrestrial			other	Y	Y	Oceania	New Zealand		Rurima Island	Site	1984	Year	1984	Unspecified	1984	1984	One-time	7366			9815		7366	9815		USD	2003
IC_1.0_209	214	WoS	12448	Costing eradications of alien mammals from islands	Martins et al		2006	English	Peer-reviewed article	NA	Yes	Animalia	Chordata	Mammalia	Rodentia	Muridae	Rattus	Rattus sp.		Rats	Terrestrial	Terrestrial			other	Y	Y	Oceania	Australia		Sandy Lacepede	Site	1986	Year	1986	Unspecified	1986	1986	One-time	51653			68826.2		51653	68826.2		USD	2003
IC_1.0_210	215	WoS	12448	Costing eradications of alien mammals from islands	Martins et al		2006	English	Peer-reviewed article	NA	Yes	Animalia	Chordata	Mammalia	Rodentia	Muridae	Rattus	Rattus sp.		Rats	Terrestrial	Terrestrial			other	Y	Y	Asia	Indonesia		Sangalaki	Site	2003	Year	2003	Unspecified	2003	2003	One-time	2800			3730.93		2800	3730.93		USD	2003
IC_1.0_212	217	WoS	12448	Costing eradications of alien mammals from islands	Martins et al		2006	English	Peer-reviewed article	NA	Yes	Animalia	Chordata	Mammalia	Rodentia	Muridae	Rattus	Rattus sp.		Rats	Terrestrial	Terrestrial			other	Y	Y	Oceania	New Zealand		Tawhitinui	Site	1983	Year	1983	Unspecified	1983	1983	One-time	4225			5629.7		4225	5629.7		USD	2003
IC_1.0_213	218	WoS	12448	Costing eradications of alien mammals from islands	Martins et al		2006	English	Peer-reviewed article	NA	Yes	Animalia	Chordata	Mammalia	Rodentia	Muridae	Rattus	Rattus sp.		Rats	Terrestrial	Terrestrial			other	Y	Y	South America	United Kingdom		Falklands (Top)	Site	2000	Year	2000	Unspecified	2000	2000	One-time	2974			3962.78		2974	3962.78		USD	2003
IC_1.0_217	222	TC	203	Benefits, constraints, risks and costs of rodent control options on Lord Howe Island. Lincoln, New Zealand: Landcare Research Ltd	Parkes et al		2004	English	Official report	Wilcox, C., & Donlan, J. (2007). Compensatory mitigation as a solution to fisheries bycatch-biodiversity conservation conflicts. Frontiers in Ecology and the Environment, 5(6), 325–331. https://doi.org/10.1890/1540-9295(2007)5[325:CMAAST]2.0.CO;3	No	Animalia	Chordata	Mammalia	Rodentia	Muridae	Rattus	Rattus rattus		Black rat	Terrestrial	Terrestrial			other	Y	Y	Oceania	Australia		Lord Howe Island	Site	Unspecified	Year	Unspecified	Unspecified	2004	2004	One-time	500640			649696		500640	649696		USD	2004
IC_1.0_218	223	TC	203	Benefits, constraints, risks and costs of rodent control options on Lord Howe Island. Lincoln, New Zealand: Landcare Research Ltd	Parkes et al		2004	English	Official report	Wilcox, C., & Donlan, J. (2007). Compensatory mitigation as a solution to fisheries bycatch-biodiversity conservation conflicts. Frontiers in Ecology and the Environment, 5(6), 325–331. https://doi.org/10.1890/1540-9295(2007)5[325:CMAAST]2.0.CO;3	No	Animalia	Chordata	Mammalia	Rodentia	Muridae	Rattus	Rattus rattus		Black rat	Terrestrial	Terrestrial			other	Y	Y	Oceania	Australia		Lord Howe Island	Site	2004	Year	2004	Unspecified	2004	2004	Potentially ongoing	39000			50611.5		39000	50611.5		USD	2004
IC_1.0_223	228	TC	325	Feral Himalayan porcupines in Devon	Smallshire and Davey		1989	English	Official report	Helmstedt, K. J., Shaw, J. D., Bode, M., Terauds, A., Springer, K., Robinson, S. A., & Possingham, H. P. (2016). Prioritizing eradication actions on islands: it’s not all or nothing. Journal of Applied Ecology, 53(3), 733–741. https://doi.org/10.1111/1365-2664.12599 --> Gregory, S., Henderson, W., Smee, E., & Cassey, P. (2014). Eradications of vertebrate pests in Australia	No	Animalia	Chordata	Mammalia	Rodentia	Hystricidae	Hystrix	Hystrix brachyura		Himalayan porcupines	Terrestrial	Terrestrial			other		Y	Europe	United Kingdom		Devon	Site	1989	Year	1989	1989	1989	1989	One-time	230000			260011	341124	230000	260011	341124	EUR	2016
IC_1.0_280	287	TC	564	The economic impacts of vertebrate pests in Australia	Gong et al		2009	English	Official report	NA	Yes	Animalia	Chordata	Mammalia	Rodentia	Muridae	Mus	Mus musculus		House mouse	Terrestrial	Terrestrial			other		Y	Oceania	Australia		Darling Downs/Queensland	Site	2009	Year	2009	Unspecified	2009	2009	Potentially ongoing	2000000			1.78219e+06	1.58523e+06	2000000	1.78219e+06	1.58523e+06	AUD	2009
IC_1.0_313	320	WoS	7807	Minimising number killed in long-term vertebrate pest management programmes, and associated economic incentives	Warburton et al		2012	English	Peer-reviewed article	NA	Yes	Animalia	Chordata	Mammalia	Rodentia	Muridae	Rattus	Rattus rattus		Black rat	Terrestrial	Terrestrial			other		Y	Oceania	New Zealand		NA	Unit (100 Ha)	2012	Year	2012	Unspecified	2012	2012	Potentially ongoing	800	200	800	691.979	571.065	800	691.979	571.065	NZD	2012
IC_1.0_332	339	TC	225	Correction: Reporting costs for invasive vertebrate eradications	Holmes et al		2015	English	Peer-reviewed article	NA	Yes	Animalia	Chordata	Mammalia	Rodentia	Muridae	Diverse/Unspecified	Diverse/Unspecified		Rodents	Terrestrial	Terrestrial			other		Y	North America	United States of America		Navassa Atoll	Unit (471 Ha)	Unspecified	Year	Unspecified	Unspecified	2015	2015	One-time	1752000			1.84347e+06	1.84347e+06	1752000	1.84347e+06	1.84347e+06	USD	2013
IC_1.0_336	343	TC	498	Response of Wedge-tailed Shearwaters ( Puffinus pacificus ) to Eradication of Black Rats (Rattus rattus) from Mokuauia Island after Reinvasion	Marie et al		2014	English	Peer-reviewed article	Holmes et al. 2015. Correction: Reporting costs for invasive vertebrate eradications	Yes	Animalia	Chordata	Mammalia	Rodentia	Muridae	Rattus	Rattus rattus		Black rat	Terrestrial	Terrestrial			other	Y	Y	Pacific Islands	United States of America	Hawaii	Hawaii (Moku'auia)	Unit (5 Ha)	4 months (October 2011 to January 2012)	Year	2012	2012	2012	2012	One-time	1268			1312.9	1312.9	1268	1312.9	1312.9	USD	2014
IC_1.0_337	344	TC	225	Correction: Reporting costs for invasive vertebrate eradications	Holmes et al		2015	English	Peer-reviewed article	NA	Yes	Animalia	Chordata	Mammalia	Rodentia	Muridae	Diverse/Unspecified	Diverse/Unspecified		Rodents	Terrestrial	Terrestrial			other		Y	Central America	The Bahamas		Allen Cay	Unit (6 Ha)	Until 2012	Period	Unspecified	2012		2012	One-time	137000			144153					USD	2013
IC_1.0_338	345	TC	225	Correction: Reporting costs for invasive vertebrate eradications	Holmes et al		2015	English	Peer-reviewed article	NA	Yes	Animalia	Chordata	Mammalia	Rodentia	Muridae	Rattus	Rattus exulans/Rattus tanezumi		Polynesian rat/Tanezumi rat	Terrestrial	Terrestrial			other		Y	Pacific Islands	United States of America		Wake Atoll	Site	Until 2012	Period	Unspecified	2012		2012	One-time	2020000			2.12546e+06	2.12546e+06				USD	2013
IC_1.0_339	347	TC	328	FINAL ENVIRONMENTAL IMPACT STATEMENT. Palmyra Atoll National Wildlife Refuge Rat Eradication Project	United States Fish and Wildlife Service		2011	English	Official report	Holmes et al. 2016. Correction: Reporting costs for invasive vertebrate eradications	Yes	Animalia	Chordata	Mammalia	Rodentia	Muridae	Rattus	Rattus rattus		Black rat	Terrestrial	Terrestrial			other	Y	Y	Oceania/Pacific Islands	United States of America		Palmyra Atoll	Unit (250 Ha)	Unspecified	Year	Unspecified	Unspecified	2011	2011	One-time	1915900			2.01593e+06	2.01593e+06	1915900	2.01593e+06	2.01593e+06	USD	2013
IC_1.0_340	348	TC	225	Correction: Reporting costs for invasive vertebrate eradications	Holmes et al		2015	English	Peer-reviewed article	NA	Yes	Animalia	Chordata	Mammalia	Rodentia	Muridae	Diverse/Unspecified	Diverse/Unspecified		Rodents	Terrestrial	Terrestrial			other		Y	Oceania/Pacific Islands	France		French Polynesia (Tahanea)	Unit (6 Ha)	Until 2011	Period	Unspecified	2011		2011	One-time	70000			73654.6					USD	2013
IC_1.0_341	349	TC	225	Correction: Reporting costs for invasive vertebrate eradications	Holmes et al		2015	English	Peer-reviewed article	NA	Yes	Animalia	Chordata	Mammalia	Rodentia	Muridae	Diverse/Unspecified	Diverse/Unspecified		Rodents	Terrestrial	Terrestrial			other	Y	Y	South America	Ecuador	Galapagos Islands	Rabida	Unit (706 ha)	Until 2011	Period	Unspecified	2011		2011	One-time	426000			448241					USD	2013
IC_1.0_342	350	TC	451	Operational report for Kiore Eradication in the Taranga (Hen) Island	Hawkins		2011	English	Official report	Holmes et al. 2015. Correction: Reporting costs for invasive vertebrate eradications	Yes	Animalia	Chordata	Mammalia	Rodentia	Muridae	Diverse/Unspecified	Diverse/Unspecified		Rodents	Terrestrial	Terrestrial			other		Y	Oceania	New Zealand		Taranga	Unit (509 Ha)	Until 2011	Period	Unspecified	2011		2011	One-time	185000			201597					USD	2011
IC_1.0_345	353	TC	225	Correction: Reporting costs for invasive vertebrate eradications	Holmes et al		2015	English	Peer-reviewed article	Holmes et al. 2015. Correction: Reporting costs for invasive vertebrate eradications	Yes	Animalia	Chordata	Mammalia	Rodentia	Muridae	Diverse/Unspecified	Diverse/Unspecified		Rodents	Terrestrial	Terrestrial			other		Y	Oceania	New Zealand		Rangitoto/Motutapu	Unit (3,842 Ha)	Until 2009	Period	Unspecified	2009		2009	One-time	1758000			1.8181e+06					USD	2015
IC_1.0_348	356	WoS	6274	Rapid assessment of rat eradication after aerial baiting	Samaniego-Herrera et al		2013	English	Peer-reviewed article	NA	Yes	Animalia	Chordata	Mammalia	Rodentia	Muridae	Diverse/Unspecified	Diverse/Unspecified		Rodents	Terrestrial	Terrestrial			other	Y	Y	North America	Mexico		Isabel Island	Unit (82 Ha)	Until 2009	Period	Unspecified	2009		2009	One-time	268421			282435					USD	2013
IC_1.0_349	357	WoS	6274	Rapid assessment of rat eradication after aerial baiting	Samaniego-Herrera et al		2013	English	Peer-reviewed article	NA	Yes	Animalia	Chordata	Mammalia	Rodentia	Muridae	Diverse/Unspecified	Diverse/Unspecified		Rodents	Terrestrial	Terrestrial			other	Y	Y	North America	Mexico		Isabel Island	Unit (82 Ha)	After 2009	Year	2009	Unspecified	2009	2009	One-time	39750			41825.3		39750	41825.3		USD	2013
IC_1.0_350	358	TC	225	Correction: Reporting costs for invasive vertebrate eradications	Holmes et al		2015	English	Peer-reviewed article	NA	Yes	Animalia	Chordata	Mammalia	Rodentia	Muridae	Diverse/Unspecified	Diverse/Unspecified		Rodents	Terrestrial	Terrestrial			other		Y	North America	United States of America		Rat island	Unit (2,800 Ha)	Until 2008	Period	Unspecified	2008		2008	One-time	2522000			2.65367e+06	2.65367e+06				USD	2013
IC_1.0_351	359	TC	204	Beyond Kapiti - a decade of invasive rodent eradications from New Zealand islands + Unpublished data	Broome		2009	English	Peer-reviewed article	Holmes et al. 2016. Correction: Reporting costs for invasive vertebrate eradications	Yes	Animalia	Chordata	Mammalia	Rodentia	Muridae	Rattus	Rattus exulans		Polynesian rat	Terrestrial	Terrestrial			other	Y	Y	Oceania	New Zealand		Little Barrier	Unit (3,083 Ha)	Until 2004	Period	Unspecified	2004		2004	One-time	520700			594927					USD	2009
IC_1.0_352	360	TC	294	Eradication of black rats Rattus rattus from Anacapa Island	Howald et al		2010	English	Peer-reviewed article	Holmes et al. 2016. Correction: Reporting costs for invasive vertebrate eradications	Yes	Animalia	Chordata	Mammalia	Rodentia	Muridae	Diverse/Unspecified	Diverse/Unspecified		Rodents	Terrestrial	Terrestrial			other		Y	North America	United States of America		Anacapa	Unit (296 Ha)	2 years	Period	2008	2010	2008	2010	One-time	1800000			1.89398e+06	1.89398e+06	600000	631326	631326	USD	2013
IC_1.0_354	362	GS	299	Beyond Kapiti - a decade of invasive rodent eradications from new zealand islands	Broome		2009	English	Peer-reviewed article	NA	Yes	Animalia	Chordata	Mammalia	Rodentia	Muridae	Rattus	Rattus exulans/Rattus norvegicus		Polynesian rat/Brown rat	Terrestrial	Terrestrial			other		Y	Oceania	New Zealand		Raoul	Unit (2,941 Ha)	2002	Year	2002	Unspecified	2002	2002	One-time	866000			989450		866000	989450		USD	2009
IC_1.0_355	363	GS	299	Beyond Kapiti - a decade of invasive rodent eradications from new zealand islands	Broome		2009	English	Peer-reviewed article	NA	Yes	Animalia	Chordata	Mammalia	Rodentia	Muridae	Rattus	Rattus exulans/Rattus norvegicus		Polynesian rat/Brown rat	Terrestrial	Terrestrial			other	Y	Y	Oceania	New Zealand		Kapiti Island	Unit (2,941 Ha)	1996	Year	1996	Unspecified	1996	1996	One-time	428200			489241		428200	489241		USD	2009
IC_1.0_356	364	GS	299	Beyond Kapiti - a decade of invasive rodent eradications from new zealand islands	Broome		2009	English	Peer-reviewed article	NA	Yes	Animalia	Chordata	Mammalia	Rodentia	Muridae	Rattus	Rattus exulans		Polynesian rat	Terrestrial	Terrestrial			other	Y	Y	Oceania	New Zealand		Whenua Hou (Codfish)	Site	1998	Year	1998	Unspecified	1998	1998	One-time	387400			442624		387400	442624		USD	2009
IC_1.0_357	365	GS	299	Beyond Kapiti - a decade of invasive rodent eradications from new zealand islands	Broome		2009	English	Peer-reviewed article	NA	Yes	Animalia	Chordata	Mammalia	Rodentia	Muridae	Rattus	Rattus exulans/Rattus norvegicus		Polynesian rat/Brown rat	Terrestrial	Terrestrial	Forest	1	other	Y	Y	Oceania	New Zealand		Tuhua	Site	2000	Year	2000	Unspecified	2000	2000	One-time	136500			155958		136500	155958		USD	2009
IC_1.0_358	366	GS	299	Beyond Kapiti - a decade of invasive rodent eradications from new zealand islands	Broome		2009	English	Peer-reviewed article	NA	Yes	Animalia	Chordata	Mammalia	Rodentia	Muridae	Rattus	Rattus norvegicus		Brown rat	Terrestrial	Terrestrial			other	Y	Y	Oceania	New Zealand		Campbell	Site	2001	Year	2001	Unspecified	2001	2001	One-time	1868700			2.13509e+06		1868700	2.13509e+06		USD	2009
IC_1.0_359	367	GS	299	Beyond Kapiti - a decade of invasive rodent eradications from new zealand islands	Broome		2009	English	Peer-reviewed article	NA	Yes	Animalia	Chordata	Mammalia	Rodentia	Muridae	Rattus	Rattus exulans/Rattus norvegicus		Polynesian rat/Brown rat	Terrestrial	Terrestrial			other		Y	Oceania	New Zealand		Titi Islands/Taukihepa/Rerewhakaupoko/Pukeweka/Mokonui	Site	2006	Year	2006	Unspecified	2006	2006	One-time	163200			186464		163200	186464		USD	2009
IC_1.0_360	368	GS	299	Beyond Kapiti - a decade of invasive rodent eradications from new zealand islands	Broome		2009	English	Peer-reviewed article	NA	Yes	Animalia	Chordata	Mammalia	Rodentia	Muridae	Mus/Rattus	Mus musculus/Rattus rattus		House mouse/Black rat	Terrestrial	Terrestrial			other		Y	Oceania	New Zealand		Pomona/Rona	Site	2007	Year	2007	Unspecified	2007	2007	One-time	39200			44788		39200	44788		USD	2009
IC_1.0_362	370	TC	572	The eradication of Norway rats, kiore and feral cats from Tuhua (Mayor Island)	Williams and Jones		2002	English	Peer-reviewed article	Holmes et al. 2015. Correction: Reporting costs for invasive vertebrate eradications	Yes	Animalia	Chordata	Mammalia	Rodentia	Muridae	Diverse/Unspecified	Diverse/Unspecified		Rodents	Terrestrial	Terrestrial	Forest	1	other	Y	Y	Oceania	New Zealand		Tuhua	Site	Unspecified	Year	Unspecified	Unspecified	2002	2002	One-time	105000			149463		105000	149463		USD	2000
IC_1.0_363	371	TC	598	The successful eradication of introduced roof rats (Rattus rattus) from Buck Island using diphacinone, followed by an irruption of house mice (Mus musculus)	Witmer et al		2007	English	Peer-reviewed article	Holmes et al. 2015. Correction: Reporting costs for invasive vertebrate eradications	Yes	Animalia	Chordata	Mammalia	Rodentia	Muridae	Diverse/Unspecified	Diverse/Unspecified		Rodents	Terrestrial	Terrestrial			other	Y	Y	North America	United States of America		Buck	Unit (80 Ha)	1998-2005	Year	1998	2005	1998	2005	One-time	33500			39603.6	39603.6	33500	39603.6	39603.6	USD	2007
IC_1.0_366	374	TC	445	Offshore Islands co-operative conservation project with ICI crop care division: Phase One (Stanley Island)	Towns et al		1993	English	Official report	Holmes et al. 2015. Correction: Reporting costs for invasive vertebrate eradications	Yes	Animalia	Chordata	Mammalia	Rodentia	Muridae	Rattus	Rattus exulans		Pacific rat	Terrestrial	Terrestrial	the forest vegetation was reduced to an open woodland (mostly of pohutukawa, Metrosideros excelsa) that lacked an understorey.		other	Y	Y	Oceania	New Zealand		Cuvier	Unit (170 Ha)	September 1993-March 1994	Year	1994	1994	1994	1994	One-time	30765			32474.9	33829.4	30765	32474.9	33829.4	NZD	1995
IC_1.0_367	375	TC	446	Offshore Islands co-operative conservation project with ICI crop care division: Phase Two (Red Mercury Island)	Towns et al		1993	English	Official report	Holmes et al. 2015. Correction: Reporting costs for invasive vertebrate eradications	Yes	Animalia	Chordata	Mammalia	Rodentia	Muridae	Rattus	Rattus exulans		Pacific rat	Terrestrial	Terrestrial			other	Y	Y	Oceania	New Zealand		Red Mercury	Unit (225 Ha)	Sept 1992 + 36 weeks of monitoring	Year	1992	1992	1992	1992	One-time	41728			40915.9	47130.1	41728	40915.9	47130.1	NZD	1994
IC_1.0_368	376	TC	612	Using Brodifacoum to eradicate kiore (Rattus exulans) from Burgess Island and the Knights group of the Mokohinau Islands	McFadden and Greene		1994	English	Official report	Holmes et al. 2015. Correction: Reporting costs for invasive vertebrate eradications	Yes	Animalia	Chordata	Mammalia	Rodentia	Muridae	Diverse/Unspecified	Diverse/Unspecified		Rodents	Terrestrial	Terrestrial			other		Y	Oceania	New Zealand		Burgess Mokohinau	Unit (100 Ha)	1993	Year	1993	1993	1993	1993	One-time	30075	16110	44040	27577.1	34402.6	30075	27577.1	34402.6	NZD	1993
IC_1.0_369	377	TC	445	Offshore Islands co-operative conservation project with ICI crop care division: Phase One (Stanley Island)	Towns et al		1993	English	Official report	Holmes et al. 2015. Correction: Reporting costs for invasive vertebrate eradications	Yes	Animalia	Chordata	Mammalia	Rodentia	Muridae	Diverse/Unspecified	Diverse/Unspecified		Rodents	Terrestrial	Terrestrial			other		Y	Oceania	New Zealand		Stanley	Unit (100 Ha)	July 1991-June 1992	Year	1992	1992	1992	1992	One-time	36603			33562.9	41870	36603	33562.9	41870	NZD	1993
IC_1.0_370	378	TC	302	Eradication of Kiore (Rattus exulans) from Double Island, Mercury Group in Northern New Zealand	McFadden		1992	English	Official report	Holmes et al. 2015. Correction: Reporting costs for invasive vertebrate eradications	Yes	Animalia	Chordata	Mammalia	Rodentia	Muridae	Rattus	Rattus exulans		Polynesian rat	Terrestrial	Terrestrial	The forest canopy consists of red mapou (Myrsine australis), mahoe (Melicytus ramiflorus), with emergent pohutukawa (Metrosideros excelsa)	1	other	Y	Y	Oceania	New Zealand		Double Islands (Larger island)	Unit (19 Ha)	October 1989	Year	1989	1989	1989	1989	One-time	19850			34676		19850	34676		USD	1992
IC_1.0_371	379	TC	302	Eradication of Kiore (Rattus exulans) from Double Island, Mercury Group in Northern New Zealand	McFadden		1992	English	Official report	Holmes et al. 2015. Correction: Reporting costs for invasive vertebrate eradications	Yes	Animalia	Chordata	Mammalia	Rodentia	Muridae	Rattus	Rattus exulans		Polynesian rat	Terrestrial	Terrestrial	The forest canopy consists of red mapou (Myrsine australis), mahoe (Melicytus ramiflorus), with emergent pohutukawa (Metrosideros excelsa)	1	other	Y	Y	Oceania	New Zealand		Double Islands (Smaller island)	Unit (8 Ha)	November 1989	Year	1989	1989	1989	1989	One-time	14915			26055.1		14915	26055.1		USD	1992
IC_1.0_372	380	TC	292	Eradication campaigns against kiore (Rattus exulans) on Rurima Rocks and Korapuki Island, Northern New Zealand	McFadden and Towns		1991	English	Official report	Holmes et al. 2015. Correction: Reporting costs for invasive vertebrate eradications	Yes	Animalia	Chordata	Mammalia	Rodentia	Muridae	Rattus	Rattus exulans		Polynesian rat	Terrestrial	Terrestrial	Korapuki has been extensively burnt in the past leaving remnants of the original vegetation only on two rocky promontories. Species present in the remnants include milk tree (Paratrophis banksii), karaka (Corynocarpus laevigatus), kawakawa (Macropiper excelsum), karo (Pittosporum crassifolium), wharangi (Melicope ternata), and some native herbaceous plants. The rest of the island is covered by a …	2\3	other	Y	Y	Oceania	New Zealand		Korapuki Island	Site	1986-1987	Year	1986	1987	1987	1987	One-time	6800			7610.67	8291.38	6800	7610.67	8291.38	NZD	1990
IC_1.0_373	381	TC	292	Eradication campaigns against kiore (Rattus exulans) on Rurima Rocks and Korapuki Island, Northern New Zealand	McFadden and Towns		1991	English	Official report	Holmes et al. 2015. Correction: Reporting costs for invasive vertebrate eradications	Yes	Animalia	Chordata	Mammalia	Rodentia	Muridae	Rattus	Rattus exulans		Polynesian rat	Terrestrial	Terrestrial	All four islets of Rurima are capped with pohutukawa (Metrosideros excelsa), and have an understorey of ..	1	other	Y	Y	Oceania	New Zealand		Rurima Island	Unit (8 Ha)	1983-1984	Year	1983	1984	1984	1984	One-time	9985			11175.4	12174.9	9985	11175.4	12174.9	NZD	1990
IC_1.0_376	384	WoS	6888	Changes in the impact and control of an invasive alien: The grey squirrel (Sciurus carolinensis) in Great Britain, as determined from regional surveys	Mayle and Broome		2013	English	Peer-reviewed article	NA	Yes	Animalia	Chordata	Mammalia	Rodentia	Sciuridae	Sciurus	Sciurus carolinensis		Grey squirrel	Terrestrial	Terrestrial			other		Y	Europe	United Kingdom		Diverse/Unspecified	Country	2011	Year	2011	2011	2011	2011	Potentially ongoing	11400000			1.72919e+07	1.75947e+07	11400000	1.72919e+07	1.75947e+07	EUR	2011
IC_1.0_377	385	WoS	6888	Changes in the impact and control of an invasive alien: The grey squirrel (Sciurus carolinensis) in Great Britain, as determined from regional surveys	Mayle and Broome		2013	English	Peer-reviewed article	NA	Yes	Animalia	Chordata	Mammalia	Rodentia	Sciuridae	Sciurus	Sciurus carolinensis		Grey squirrel	Terrestrial	Terrestrial			other		Y	Europe	United Kingdom		NA	Unit (Ha)	1983	Year	1983	Unspecified	1983	1983	Potentially ongoing	22.8			34.5838	35.1893	22.8	34.5838	35.1893	EUR	2011
IC_1.0_378	386	TC	236	Damage by grey squirrels. II. The value of prediction	Kenward and Dutton		1996	English	Peer-reviewed article	Mayle, B. A., & Broome, A. C. (2013). Changes in the impact and control of an invasive alien: The grey squirrel (Sciurus carolinensis) in Great Britain, as determined from regional surveys. Pest Management Science, 69(3), 323–333. https://doi.org/10.1002/ps.3458	No	Animalia	Chordata	Mammalia	Rodentia	Sciuridae	Sciurus	Sciurus carolinensis		Grey squirrel	Terrestrial	Terrestrial			other		Y	Europe	United Kingdom		NA	Unit (beech plantation)	Over 30 years	Period	1966	1996	1966	1996	Potentially ongoing	1.83333			4.46998	4.00924	0.0591398	0.144193	0.12933	GBP	1996
IC_1.0_405	413	WoS	1129	Optimizing confirmation of invasive species eradication with rapid eradication assessment	Russell et al		2017	English	Peer-reviewed article	NA	Yes	Animalia	Chordata	Mammalia	Rodentia	Muridae	Mus	Mus musculus		House mouse	Terrestrial	Terrestrial			other	Y	Y	North America	Mexico		Isla Pajaros/Isla Muertos	Site	2017	Year	2017	2017	2017	2017	One-time	312623			312623		312623	312623		USD	2017
IC_1.0_406	414	WoS	1129	Optimizing confirmation of invasive species eradication with rapid eradication assessment	Russell et al		2017	English	Peer-reviewed article	NA	Yes	Animalia	Chordata	Mammalia	Rodentia	Muridae	Mus	Mus musculus		House mouse	Terrestrial	Terrestrial			other	Y	Y	North America	Mexico		Isla Pajaros/Isla Muertos	Site	2017	Year	2017	2017	2017	2017	One-time	15000			15000		15000	15000		USD	2017
IC_1.0_408	416	WoS	4357	Optimising the application of multiple-capture traps for invasive species management using spatial simulation	Warburton and Gormley		2015	English	Peer-reviewed article	NA	Yes	Animalia	Chordata	Mammalia	Rodentia	Muridae	Rattus	Rattus rattus		Black rat	Terrestrial	Terrestrial			other		Y	Oceania	New Zealand		NA	Unit (Ha)	2015	Year	2015	2015	2015	2015	One-time	650			672.221		650	672.221		USD	2015
IC_1.0_409	417	WoS	3738	The impact and legislative framework of invasive mammals on Portuguese Macaronesian islands: A case study on Corvo, Azores	Parejo et al		2015	English	Peer-reviewed article	NA	Yes	Animalia	Chordata	Mammalia	Rodentia	Muridae	Diverse/Unspecified	Diverse/Unspecified		Rodents	Terrestrial	Terrestrial			other	Y	Y	Europe	Portugal		Corvo island	Site	2009-2013	Period	2009	2013	2009	2013	One-time	12000			13769.3	21216	2400	2753.86	4243.2	EUR	2015
IC_1.0_412	420	WoS	5924	Using digital data collection tools to improve overall cost-efficiency and provide timely analysis for decision making during invasive species eradication campaigns	Will et al		2014	English	Peer-reviewed article	NA	Yes	Animalia	Chordata	Mammalia	Rodentia	Muridae	Rattus	Rattus norvegicus		Brown rat	Terrestrial	Terrestrial			other		Y	North America	Canada		Haida Gwaii/British Columbia	Site	2 months	Year	Unspecified	Unspecified	2014	2014	One-time	53755			55658.6		53755	55658.6		USD	2014
IC_1.0_425	433	WoS	6054	Locating species range frontiers: A cost and efficiency comparison of citizen science and hair-tube survey methods for use in tracking an invasive squirrel	Goldstein et al		2014	English	Peer-reviewed article	NA	Yes	Animalia	Chordata	Mammalia	Rodentia	Sciuridae	Sciurus	Sciurus carolinensis		Grey squirrel	Terrestrial	Terrestrial			other		Y	Europe	Ireland		Munster Province	Site	196-730 days	Year	Unspecified	Unspecified	2014	2014	One-time	5794.25	10246.6	12930.4	7947.79	7515.83	5794.25	7947.79	7515.83	EUR	2012
IC_1.0_450	458	TC	203	Benefits, constraints, risks and costs of rodent control options on Lord Howe Island. Lincoln, New Zealand: Landcare Research Ltd	Parkes et al		2004	English	Official report	Pascoe, Sean; Wilcox, Chris; Donlan, C. Josh, 2011. Biodiversity offsets: A cost-effective interim solution to seabird bycatch in fisheriesUnknown ID 8431	No	Animalia	Chordata	Mammalia	Rodentia	Muridae	Diverse/Unspecified	Diverse/Unspecified		Mice and rats	Terrestrial	Terrestrial			other		Y	Oceania	Australia		Diverse/Unspecified	Country	Unspecified	Year	Unspecified	Unspecified	2004	2004	One-time	920000			948656	688189	920000	948656	688189	AUD	2010
IC_1.0_485	493	TC	475	Proceedings nutria and muskrat management symposium. Louisiana Cooperative Extension Service	Hebert		1992	English	Conference proceedings	In Baroch, J., Hafner, M., Brown, T. L., Mach, J., & Poché, M. R. (2002). Nutria (myocastor coypus) in Louisiana. (HW)	No	Animalia	Chordata	Mammalia	Rodentia	Myocastoridae	Myocastor	Myocastor coypus		Nutria	Semi-aquatic	Semi-aquatic			other			North America	United States of America	Louisiana	Louisiana	Site	1991	Year	1991	Unspecified	1991	1991	Potentially ongoing	2000000			3.49381e+06	3.49381e+06	2000000	3.49381e+06	3.49381e+06	USD	1992
IC_1.0_486	494	TC	624	Welfare loss of wetlands disintegration: a Louisiana study	Farber		1996	English	Peer-reviewed article	Baroch, J., Hafner, M., Brown, T. L., Mach, J., & Poché, M. R. (2002). Nutria (myocastor coypus) in Louisiana. (HW)	No	Animalia	Chordata	Mammalia	Rodentia	Myocastoridae	Myocastor	Myocastor coypus		Nutria	Semi-aquatic	Semi-aquatic			other			North America	United States of America	Louisiana	Louisiana	Site	Unspecified	Period	Unspecified	Unspecified			Potentially ongoing	15100000000	5900000000	24300000000	2.83281e+10	2.83281e+10				USD	1990
IC_1.0_487	495	TC	217	Coastal project list narrowed to 19. The Advocate. Baton Rouge, LA	Dunne		2001	English	Official report	Baroch, J., Hafner, M., Brown, T. L., Mach, J., & Poché, M. R. (2002). Nutria (myocastor coypus) in Louisiana. (HW)	No	Animalia	Chordata	Mammalia	Rodentia	Myocastoridae	Myocastor	Myocastor coypus		Nutria	Semi-aquatic	Semi-aquatic			other			North America	United States of America	Louisiana	Louisiana	Site	Unspecified	Year	Unspecified	Unspecified	2001	2001	One-time	1600000			2.21494e+06	2.21494e+06	1600000	2.21494e+06	2.21494e+06	USD	2001
IC_1.0_488	496	TC	443	Nutria (myocastor coypus) in Louisiana	Baroch et al		2002	English	Official report	NA	Yes	Animalia	Chordata	Mammalia	Rodentia	Myocastoridae	Myocastor	Myocastor coypus		Nutria	Semi-aquatic	Semi-aquatic			other			North America	United States of America		Diverse/Unspecified	Country	6 days	Year	Unspecified	Unspecified	2002	2002	One-time	10466	1500	15947	14262.2	14262.2	10466	14262.2	14262.2	USD	2002
IC_1.0_489	497	TC	443	Nutria (myocastor coypus) in Louisiana	Baroch et al		2002	English	Official report	NA	Yes	Animalia	Chordata	Mammalia	Rodentia	Myocastoridae	Myocastor	Myocastor coypus		Nutria	Semi-aquatic	Semi-aquatic			other			North America	United States of America	Louisiana	Louisiana	Site	Unspecified	Year	Unspecified	Unspecified	2002	2002	One-time	1100000	300000	500000	1.49899e+06	1.49899e+06	1100000	1.49899e+06	1.49899e+06	USD	2002
IC_1.0_490	498	TC	443	Nutria (myocastor coypus) in Louisiana	Baroch et al		2002	English	Official report	NA	Yes	Animalia	Chordata	Mammalia	Rodentia	Myocastoridae	Myocastor	Myocastor coypus		Nutria	Semi-aquatic	Semi-aquatic			other			North America	United States of America	Louisiana	Louisiana	Site	2002	Year	2002	Unspecified	2002	2002	Potentially ongoing	6000000			8.17633e+06	8.17633e+06	6000000	8.17633e+06	8.17633e+06	USD	2002
IC_1.0_491	499	TC	443	Nutria (myocastor coypus) in Louisiana	Baroch et al		2002	English	Official report	NA	Yes	Animalia	Chordata	Mammalia	Rodentia	Myocastoridae	Myocastor	Myocastor coypus		Nutria	Semi-aquatic	Semi-aquatic			other			North America	United States of America	Louisiana	Louisiana	Site	5 to 8 years	Period	1997	2002	1997	2002	One-time	7500000			1.02204e+07	1.02204e+07	1250000	1.7034e+06	1.7034e+06	USD	2002
IC_1.0_493	501	WoS	9614	Prioritizing rat eradication on islands by cost and effectiveness to protect nesting seabirds	Capizzi et al		2010	English	Peer-reviewed article	NA	Yes	Animalia	Chordata	Mammalia	Rodentia	Muridae	Rattus	Rattus rattus		Black rat	Terrestrial	Terrestrial			other		Y	Europe	Italy		Islands	Country	2010	Year	2010	2010	2010	2010	One-time	1571000			2.3412e+06	2.28595e+06	1571000	2.3412e+06	2.28595e+06	EUR	2010
IC_1.0_495	503	WoS	8383	Allocating biosecurity resources between preventing, detecting, and eradicating island invasions	Rout et al		2011	English	Peer-reviewed article	NA	Yes	Animalia	Chordata	Mammalia	Rodentia	Muridae	Rattus	Rattus rattus		Black rat	Terrestrial	Terrestrial			other		Y	Oceania	Australia		Barrow Island	Unit (235.9 km²)	2010	Year	2010	2010	2010	2010	One-time	1893079			1.95204e+06	1.41608e+06	1893079	1.95204e+06	1.41608e+06	AUD	2010
IC_1.0_496	504	WoS	8383	Allocating biosecurity resources between preventing, detecting, and eradicating island invasions	Rout et al		2011	English	Peer-reviewed article	NA	Yes	Animalia	Chordata	Mammalia	Rodentia	Muridae	Rattus	Rattus rattus		Black rat	Terrestrial	Terrestrial			other		Y	Oceania	Australia		Barrow Island	Unit (235.9 km²)	2010	Year	2010	2010	2010	2010	One-time	250000			257787	187008	250000	257787	187008	AUD	2010
IC_1.0_497	505	WoS	8383	Allocating biosecurity resources between preventing, detecting, and eradicating island invasions	Rout et al		2011	English	Peer-reviewed article	NA	Yes	Animalia	Chordata	Mammalia	Rodentia	Muridae	Rattus	Rattus rattus		Black rat	Terrestrial	Terrestrial			other		Y	Oceania	Australia		Barrow Island	Unit (235.9 km²)	2010	Year	2010	2010	2010	2010	One-time	500000			515574	374016	500000	515574	374016	AUD	2010
IC_1.0_498	506	WoS	8383	Allocating biosecurity resources between preventing, detecting, and eradicating island invasions	Rout et al		2011	English	Peer-reviewed article	NA	Yes	Animalia	Chordata	Mammalia	Rodentia	Muridae	Rattus	Rattus rattus		Black rat	Terrestrial	Terrestrial			other		Y	Oceania	Australia		Barrow Island	Unit (235.9 km²)	5 to 8 years	Year	2011	2016	2011	2016	Potentially ongoing	2001450000	2900000	4000000000	2.06379e+09	1.49715e+09	2001450000	2.06379e+09	1.49715e+09	AUD	2010
IC_1.0_510	518	WoS	10323	How to prioritize rat management for the benefit of petrels: A case study of the UK, Channel Islands and Isle of Man	Ratcliffe et al		2009	English	Peer-reviewed article	NA	Yes	Animalia	Chordata	Mammalia	Rodentia	Muridae	Rattus	Rattus exulans/Rattus norvegicus/Rattus rattus		Polynesian rat/Black rat/Brown rat	Terrestrial	Terrestrial			other		Y	Europe	United Kingdom		Shiants	Unit (212 Ha)	2006	Year	2006	2006	2006	2006	One-time	93000			208065	162141	93000	208065	162141	GBP	2006
IC_1.0_511	519	WoS	10323	How to prioritize rat management for the benefit of petrels: A case study of the UK, Channel Islands and Isle of Man	Ratcliffe et al		2009	English	Peer-reviewed article	NA	Yes	Animalia	Chordata	Mammalia	Rodentia	Muridae	Rattus	Rattus exulans/Rattus norvegicus/Rattus rattus		Polynesian rat/Black rat/Brown rat	Terrestrial	Terrestrial			other		Y	Europe	United Kingdom		Calf of Man	Unit (260 Ha)	2006	Year	2006	2006	2006	2006	One-time	114000			202909	183568	114000	202909	183568	GBP	2009
IC_1.0_512	520	WoS	10323	How to prioritize rat management for the benefit of petrels: A case study of the UK, Channel Islands and Isle of Man	Ratcliffe et al		2009	English	Peer-reviewed article	NA	Yes	Animalia	Chordata	Mammalia	Rodentia	Muridae	Rattus	Rattus exulans/Rattus norvegicus/Rattus rattus		Polynesian rat/Black rat/Brown rat	Terrestrial	Terrestrial			other		Y	Europe	United Kingdom		Taransay	Unit (1,475 Ha)	2006	Year	2006	2006	2006	2006	One-time	649000			1.15515e+06	1.04505e+06	649000	1.15515e+06	1.04505e+06	GBP	2009
IC_1.0_513	521	WoS	10323	How to prioritize rat management for the benefit of petrels: A case study of the UK, Channel Islands and Isle of Man	Ratcliffe et al		2009	English	Peer-reviewed article	NA	Yes	Animalia	Chordata	Mammalia	Rodentia	Muridae	Rattus	Rattus exulans/Rattus norvegicus/Rattus rattus		Polynesian rat/Black rat/Brown rat	Terrestrial	Terrestrial			other		Y	Europe	United Kingdom		Hellisay⁄Gighay	Unit (238 Ha)	2006	Year	2006	2006	2006	2006	One-time	105000			186889	169076	105000	186889	169076	GBP	2009
IC_1.0_514	522	WoS	10323	How to prioritize rat management for the benefit of petrels: A case study of the UK, Channel Islands and Isle of Man	Ratcliffe et al		2009	English	Peer-reviewed article	NA	Yes	Animalia	Chordata	Mammalia	Rodentia	Muridae	Rattus	Rattus exulans/Rattus norvegicus/Rattus rattus		Polynesian rat/Black rat/Brown rat	Terrestrial	Terrestrial			other		Y	Europe	United Kingdom		Gairsay	Unit (240 Ha)	2006	Year	2006	2006	2006	2006	One-time	106000			188669	170686	106000	188669	170686	GBP	2009
IC_1.0_515	523	WoS	10323	How to prioritize rat management for the benefit of petrels: A case study of the UK, Channel Islands and Isle of Man	Ratcliffe et al		2009	English	Peer-reviewed article	NA	Yes	Animalia	Chordata	Mammalia	Rodentia	Muridae	Rattus	Rattus exulans/Rattus norvegicus/Rattus rattus		Polynesian rat/Black rat/Brown rat	Terrestrial	Terrestrial			other		Y	Europe	United Kingdom		Sandray	Unit (385 Ha)	2006	Year	2006	2006	2006	2006	One-time	169000			300803	272132	169000	300803	272132	GBP	2009
IC_1.0_516	524	WoS	10323	How to prioritize rat management for the benefit of petrels: A case study of the UK, Channel Islands and Isle of Man	Ratcliffe et al		2009	English	Peer-reviewed article	NA	Yes	Animalia	Chordata	Mammalia	Rodentia	Muridae	Rattus	Rattus exulans/Rattus norvegicus/Rattus rattus		Polynesian rat/Black rat/Brown rat	Terrestrial	Terrestrial			other		Y	Europe	United Kingdom		Rum	Unit (10,463 Ha)	2006	Year	2006	2006	2006	2006	One-time	4604000			8.19466e+06	7.41357e+06	4604000	8.19466e+06	7.41357e+06	GBP	2009
IC_1.0_517	525	WoS	10323	How to prioritize rat management for the benefit of petrels: A case study of the UK, Channel Islands and Isle of Man	Ratcliffe et al		2009	English	Peer-reviewed article	NA	Yes	Animalia	Chordata	Mammalia	Rodentia	Muridae	Rattus	Rattus exulans/Rattus norvegicus/Rattus rattus		Polynesian rat/Black rat/Brown rat	Terrestrial	Terrestrial			other		Y	Europe	United Kingdom		Inchcolm	Unit (5 Ha)	2006	Year	2006	2006	2006	2006	One-time	2000			3559.8	3220.49	2000	3559.8	3220.49	GBP	2009
IC_1.0_518	526	WoS	10323	How to prioritize rat management for the benefit of petrels: A case study of the UK, Channel Islands and Isle of Man	Ratcliffe et al		2009	English	Peer-reviewed article	NA	Yes	Animalia	Chordata	Mammalia	Rodentia	Muridae	Rattus	Rattus exulans/Rattus norvegicus/Rattus rattus		Polynesian rat/Black rat/Brown rat	Terrestrial	Terrestrial			other		Y	Europe	United Kingdom		Inchkeith	Unit (20 Ha)	2006	Year	2006	2006	2006	2006	One-time	9000			16019.1	14492.2	9000	16019.1	14492.2	GBP	2009
IC_1.0_519	527	WoS	10323	How to prioritize rat management for the benefit of petrels: A case study of the UK, Channel Islands and Isle of Man	Ratcliffe et al		2009	English	Peer-reviewed article	NA	Yes	Animalia	Chordata	Mammalia	Rodentia	Muridae	Rattus	Rattus exulans/Rattus norvegicus/Rattus rattus		Polynesian rat/Black rat/Brown rat	Terrestrial	Terrestrial			other		Y	Europe	United Kingdom		Caldey Island	Unit (120 Ha)	2006	Year	2006	2006	2006	2006	One-time	53000			94334.7	85343	53000	94334.7	85343	GBP	2009
IC_1.0_520	528	WoS	10323	How to prioritize rat management for the benefit of petrels: A case study of the UK, Channel Islands and Isle of Man	Ratcliffe et al		2009	English	Peer-reviewed article	NA	Yes	Animalia	Chordata	Mammalia	Rodentia	Muridae	Rattus	Rattus exulans/Rattus norvegicus/Rattus rattus		Polynesian rat/Black rat/Brown rat	Terrestrial	Terrestrial			other		Y	Europe	United Kingdom		Out Skerries	Unit (128 Ha)	2006	Year	2006	2006	2006	2006	One-time	56000			99674.4	90173.8	56000	99674.4	90173.8	GBP	2009
IC_1.0_521	529	WoS	10323	How to prioritize rat management for the benefit of petrels: A case study of the UK, Channel Islands and Isle of Man	Ratcliffe et al		2009	English	Peer-reviewed article	NA	Yes	Animalia	Chordata	Mammalia	Rodentia	Muridae	Rattus	Rattus exulans/Rattus norvegicus/Rattus rattus		Polynesian rat/Black rat/Brown rat	Terrestrial	Terrestrial			other		Y	Europe	United Kingdom		Wyre	Unit (311 Ha)	2006	Year	2006	2006	2006	2006	One-time	137000			243846	220604	137000	243846	220604	GBP	2009
IC_1.0_522	530	WoS	10323	How to prioritize rat management for the benefit of petrels: A case study of the UK, Channel Islands and Isle of Man	Ratcliffe et al		2009	English	Peer-reviewed article	NA	Yes	Animalia	Chordata	Mammalia	Rodentia	Muridae	Rattus	Rattus exulans/Rattus norvegicus/Rattus rattus		Polynesian rat/Black rat/Brown rat	Terrestrial	Terrestrial			other		Y	Europe	United Kingdom		Graemesay	Unit (409 Ha)	2006	Year	2006	2006	2006	2006	One-time	180000			320382	289844	180000	320382	289844	GBP	2009
IC_1.0_523	531	WoS	10323	How to prioritize rat management for the benefit of petrels: A case study of the UK, Channel Islands and Isle of Man	Ratcliffe et al		2009	English	Peer-reviewed article	NA	Yes	Animalia	Chordata	Mammalia	Rodentia	Muridae	Rattus	Rattus exulans/Rattus norvegicus/Rattus rattus		Polynesian rat/Black rat/Brown rat	Terrestrial	Terrestrial			other		Y	Europe	United Kingdom		Rathlin Island	Unit (1,400 Ha)	2006	Year	2006	2006	2006	2006	One-time	616000			1.09642e+06	991911	616000	1.09642e+06	991911	GBP	2009
IC_1.0_524	532	WoS	10323	How to prioritize rat management for the benefit of petrels: A case study of the UK, Channel Islands and Isle of Man	Ratcliffe et al		2009	English	Peer-reviewed article	NA	Yes	Animalia	Chordata	Mammalia	Rodentia	Muridae	Rattus	Rattus exulans/Rattus norvegicus/Rattus rattus		Polynesian rat/Black rat/Brown rat	Terrestrial	Terrestrial			other		Y	Europe	United Kingdom		St Agnes⁄Gugh	Unit (1,480 Ha)	2006	Year	2006	2006	2006	2006	One-time	651000			1.15871e+06	1.04827e+06	651000	1.15871e+06	1.04827e+06	GBP	2009
IC_1.0_525	533	WoS	10323	How to prioritize rat management for the benefit of petrels: A case study of the UK, Channel Islands and Isle of Man	Ratcliffe et al		2009	English	Peer-reviewed article	NA	Yes	Animalia	Chordata	Mammalia	Rodentia	Muridae	Rattus	Rattus exulans/Rattus norvegicus/Rattus rattus		Polynesian rat/Black rat/Brown rat	Terrestrial	Terrestrial			other		Y	Europe	United Kingdom		Eigg	Unit (3,049 Ha)	2006	Year	2006	2006	2006	2006	One-time	1342000			2.38862e+06	2.16095e+06	1342000	2.38862e+06	2.16095e+06	GBP	2009
IC_1.0_526	534	WoS	10323	How to prioritize rat management for the benefit of petrels: A case study of the UK, Channel Islands and Isle of Man	Ratcliffe et al		2009	English	Peer-reviewed article	NA	Yes	Animalia	Chordata	Mammalia	Rodentia	Muridae	Rattus	Rattus exulans/Rattus norvegicus/Rattus rattus		Polynesian rat/Black rat/Brown rat	Terrestrial	Terrestrial			other		Y	Europe	United Kingdom		Herm⁄Jethou	Unit (269 Ha)	2006	Year	2006	2006	2006	2006	One-time	118000			210028	190009	118000	210028	190009	GBP	2009
IC_1.0_527	535	WoS	10323	How to prioritize rat management for the benefit of petrels: A case study of the UK, Channel Islands and Isle of Man	Ratcliffe et al		2009	English	Peer-reviewed article	NA	Yes	Animalia	Chordata	Mammalia	Rodentia	Muridae	Rattus	Rattus exulans/Rattus norvegicus/Rattus rattus		Polynesian rat/Black rat/Brown rat	Terrestrial	Terrestrial			other		Y	Europe	United Kingdom		Egilsay	Unit (650 Ha)	2006	Year	2006	2006	2006	2006	One-time	286000			509051	460530	286000	509051	460530	GBP	2009
IC_1.0_528	536	WoS	10323	How to prioritize rat management for the benefit of petrels: A case study of the UK, Channel Islands and Isle of Man	Ratcliffe et al		2009	English	Peer-reviewed article	NA	Yes	Animalia	Chordata	Mammalia	Rodentia	Muridae	Rattus	Rattus exulans/Rattus norvegicus/Rattus rattus		Polynesian rat/Black rat/Brown rat	Terrestrial	Terrestrial			other		Y	Europe	United Kingdom		Muck	Unit (559 Ha)	2006	Year	2006	2006	2006	2006	One-time	246000			437855	396120	246000	437855	396120	GBP	2009
IC_1.0_538	546	TC	476	Proclaimed animal research in South Australia — cost-benefits, future directions and related issues	Henzell		1989	English	Official report	Williams, K. (1995). Managing vertebrate pests : rabbits., 1–299. Retrieved from https://ezp.lib.unimelb.edu.au/login?url=https://search.ebscohost.com/login.aspx?direct=true&db=cat00006a&AN=melb.b2093380&site=eds-live&scope=site	Yes	Animalia	Chordata	Mammalia	Rodentia	Muridae	Mus	Mus musculus		House mouse	Terrestrial	Terrestrial			both		Y	Oceania	Australia		New South Wales	Site	1989	Year	1989	Unspecified	1989	1989	Potentially ongoing	2400000			3.7526e+06		2400000	3.7526e+06		AUD	1989
IC_1.0_539	547	TC	476	Proclaimed animal research in South Australia — cost-benefits, future directions and related issues	Henzell		1989	English	Official report	Williams, K. (1995). Managing vertebrate pests : rabbits., 1–299. Retrieved from https://ezp.lib.unimelb.edu.au/login?url=https://search.ebscohost.com/login.aspx?direct=true&db=cat00006a&AN=melb.b2093380&site=eds-live&scope=site	Yes	Animalia	Chordata	Mammalia	Rodentia	Muridae	Mus	Mus musculus		House mouse	Terrestrial	Terrestrial			both		Y	Oceania	Australia		New South Wales	Site	1989	Year	1989	Unspecified	1989	1989	Potentially ongoing	860000			1.34468e+06		860000	1.34468e+06		AUD	1989
IC_1.0_541	549	WoS	14428	Effectiveness of Rodent Control and Monitoring Techniques for a Montane Rainforest	Nelson et al		2002	English	Peer-reviewed article	NA	Yes	Animalia	Chordata	Mammalia	Rodentia	Muridae	Rattus	Rattus exulans/Rattus rattus		Polynesian rat/Black rat	Terrestrial	Terrestrial			other	Y	Y	Pacific Islands	United States of America	Hawaii	Hawaii (Hakalau Forest)	Unit (Km²)	1999	Year	1999	Unspecified	1999	1999	Potentially ongoing	7000			10300.7	10300.7	7000	10300.7	10300.7	USD	1999
IC_1.0_542	550	TC	380	Invasive rodent eradication on islands	Howald et al		2007	English	Peer-reviewed article	Shiels, A. B., Pitt, W. C., Sugihara, R. T., & Witmer, G. W. (2014). Biology and Impacts of Pacific Island Invasive Species. 11. Rattus rattus, the Black Rat (Rodentia: Muridae). Pacific Science, 68(2), 145–184. https://doi.org/10.2984/68.2.1	Yes	Animalia	Chordata	Mammalia	Rodentia	Muridae	Mus/Rattus	Rattus sp./Mus sp.		Rat/Mouse	Terrestrial	Terrestrial			other		Y	Diverse/Unspecified	Diverse/Unspecified		Islands	Global	Unspecified	Year	Unspecified	Unspecified	2007	2007	One-time	1615200	123	1615200	2.02731e+06		1615200	2.02731e+06		USD	2005
IC_1.0_550	558	TC	528	Statistik om rottebekæmpelse Meddelelse fra Miljøstyrelsens konsulenter i rottebekæmpelse	Danish Environmental Protection Agency		2007	English	Official report	Gren, I.-M., Isacs, L., & Carlsson, M. (2007). Calculation of costs of invasive alien species in Sweden - technical report. Working Paper Series 2007:7.	No	Animalia	Chordata	Mammalia	Rodentia	Muridae	Mus	Mus musculus		House mouse /Brown Rat	Terrestrial	Terrestrial			other			Europe	Denmark		271 municipalities	Site	1990s	Year	1990	1999	1990	1999	One-time	60000000	58000000	62000000	1.2268e+07	8.79169e+06	60000000	1.2268e+07	8.79169e+06	DKK	2006
IC_1.0_551	559	GS	44	Calculation of costs of alien invasive species in Sweden – technical report. SLU, Institutionen för ekonomi, Uppsala, Sweden.	Gren et al		2007	English	Official report	NA	Yes	Animalia	Chordata	Mammalia	Rodentia	Muridae	Mus/Rattus	Mus musculus/Rattus norvegicus		House mouse/Brown Rat	Terrestrial	Terrestrial			both			Europe	Sweden		Diverse/Unspecified	Country	2007	Year	2007	Unspecified	2007	2007	Potentially ongoing	126000000	117000000	135000000	2.2039e+07	1.67674e+07	126000000	2.2039e+07	1.67674e+07	SEK	2007
IC_1.0_552	560	TC	222	Consultant. Miljøstyrelsens rottebekæmpelse. Danish Ministry of the Environment	Weile		2007	English	Official report	Gren, I.-M., Isacs, L., & Carlsson, M. (2007). Calculation of costs of invasive alien species in Sweden - technical report. Working Paper Series 2007:7.	No	Animalia	Chordata	Mammalia	Rodentia	Muridae	Rattus	Rattus norvegicus		Brown rat	Terrestrial	Terrestrial			other			Europe	Denmark		Diverse/Unspecified	Country	2002	Year	2002	Unspecified	2002	2002	Potentially ongoing	150000000	100000000	200000000	3.25752e+07	2.16987e+07	150000000	3.25752e+07	2.16987e+07	DKK	2007
IC_1.0_553	561	GS	44	Calculation of costs of alien invasive species in Sweden – technical report. SLU, Institutionen för ekonomi, Uppsala, Sweden.	Gren et al		2007	English	Official report	NA	Yes	Animalia	Chordata	Mammalia	Rodentia	Muridae	Mus/Rattus	Mus musculus/Rattus norvegicus		House mouse/Brown Rat	Terrestrial	Terrestrial			both			Europe	Sweden		Diverse/Unspecified	Country	2007	Year	2007	Unspecified	2007	2007	Potentially ongoing	313500000	209000000	418000000	5.48352e+07	4.1719e+07	313500000	5.48352e+07	4.1719e+07	SEK	2007
IC_1.0_559	567	Go	93	The economic cost of invasive non-native species on Great Britain	Williams et al.		2010	English	Official report	Williams, F., Eschen, R., Harris, A., Djeddour, D., Pratt, C., Shaw, R., … Murphy, S. (2010). The economic cost of invasive non-native species on Great Britain. CABI Publishing, (November), 199 pp. --> Williams, F., Eschen, R., Harris, A., Djeddour, D., Pratt, C., Shaw, R., … Murphy, S. (2010). The economic cost of invasive non-native species on Great Britain. CABI Publishing, (November), 199 pp.	No	Animalia	Chordata	Mammalia	Rodentia	Muridae	Rattus	Rattus norvegicus		Brown rat	Terrestrial	Terrestrial			other		Y	Europe	United Kingdom		England/Wales/Scotland	Country	2010	Year	2010	Unspecified	2010	2010	Potentially ongoing	21830000			3.79175e+07	3.49711e+07	21830000	3.79175e+07	3.49711e+07	GBP	2010
IC_1.0_565	576	Go	93	The economic cost of invasive non-native species on Great Britain	Williams et al		2010	English	Official report	NA	Yes	Animalia	Chordata	Mammalia	Rodentia	Sciuridae	Sciurus	Sciurus carolinensis		Grey squirrel	Terrestrial	Terrestrial			other		Y	Europe	United Kingdom		Diverse/Unspecified	Country	2010	Year	2010	Unspecified	2010	2010	Potentially ongoing	684802			1.18946e+06	1.09703e+06	684802	1.18946e+06	1.09703e+06	GBP	2010
IC_1.0_566	577	Go	93	The economic cost of invasive non-native species on Great Britain	Williams et al		2010	English	Official report	NA	Yes	Animalia	Chordata	Mammalia	Rodentia	Sciuridae	Sciurus	Sciurus carolinensis		Grey squirrel	Terrestrial	Terrestrial			other		Y	Europe	United Kingdom		Diverse/Unspecified	Country	2010	Year	2010	Unspecified	2010	2010	Potentially ongoing	5412518			9.40125e+06	8.67071e+06	5412518	9.40125e+06	8.67071e+06	GBP	2010
IC_1.0_567	578	Go	93	The economic cost of invasive non-native species on Great Britain	Williams et al		2010	English	Official report	NA	Yes	Animalia	Chordata	Mammalia	Rodentia	Sciuridae	Sciurus	Sciurus carolinensis		Grey squirrel	Terrestrial	Terrestrial			other		Y	Europe	United Kingdom		Diverse/Unspecified	Country	2010	Year	2010	Unspecified	2010	2010	Potentially ongoing	53225850	110000	106341700	9.24504e+07	8.52664e+07	53225850	9.24504e+07	8.52664e+07	GBP	2010
IC_1.0_568	579	Go	93	The economic cost of invasive non-native species on Great Britain	Williams et al		2010	English	Official report	NA	Yes	Animalia	Chordata	Mammalia	Rodentia	Myocastoridae	Myocastor	Myocastor coypus		Nutria	Semi-aquatic	Semi-aquatic			other		Y	Europe	United Kingdom		Diverse/Unspecified	Country	2010	Year	2010	Unspecified	2010	2010	Potentially ongoing	11750000	4700000	18800000	2.04091e+07	1.88232e+07	11750000	2.04091e+07	1.88232e+07	GBP	2010
IC_1.0_570	581	TC	318	Extinction to order	Gosling		1989	English	Book chapter	Genovesi, P. (2000). Guidelines for eradication of terrestrial vertebrates: a European contribution to the invasive. Other Publications in Wildlife Management, 24(February), 242–248. Retrieved from http://scholar.google.com/scholar?q=intitle:Guidelines+for+eradication+of+terrestrial+vertebrates:+a+European+contribution+to+the+invasive#0	Yes	Animalia	Chordata	Mammalia	Rodentia	Myocastoridae	Myocastor	Myocastor coypus		Nutria	Semi-aquatic	Semi-aquatic			other		Y	Europe	United Kingdom	England	Diverse/Unspecified	Country	1981-1989	Period	1981	1989	1981	1989	One-time	2500000			1.72815e+07		277778	1.92016e+06		GBP	1980
IC_1.0_574	585	WoS	4498	The potential for biodiversity offsetting to fund effective invasive species control	Norton and Warburton		2015	English	Peer-reviewed article	NA	Yes	Animalia	Chordata	Mammalia	Rodentia	Muridae	Rattus	Rattus rattus		Black rat	Terrestrial	Terrestrial			other		Y	Oceania	New Zealand		NA	Unit (Ha)	2015	Year	2015	Unspecified	2015	2015	Potentially ongoing	17			17.5812		17	17.5812		USD	2015
IC_1.0_575	586	GS	307	Invasive alien species: a toolkit of best prevention and management practices	Wittenberg and Cock		2001	English	Book	NA	Yes	Animalia	Chordata	Mammalia	Rodentia	Muridae	Rattus	Rattus norvegicus/Rattus rattus		Brown rat/Black rat	Terrestrial	Terrestrial			other		Y	Africa	Seychelles		Some islands	Site	May-August 2000	Year	2000	2000	2000	2000	One-time	250000			355865		250000	355865		USD	2000
IC_1.0_578	589	GS	308	Invasive alien species: The urban dimension	van Ham et al		2013	English	Book	NA	Yes	Animalia	Chordata	Mammalia	Rodentia	Sciuridae	Sciurus	Sciurus carolinensis		Grey squirrel	Terrestrial	Terrestrial			urban			Europe	Italy		Umbria	Site	2010	Year	2010	Unspecified	2010	2010	Potentially ongoing	15000			22353.9	21826.4	15000	22353.9	21826.4	EUR	2010
IC_1.0_590	601	GS	223	Plant, Animal, and Microbe Invasive Species in the United States and World	Pimentel et al		2007	English	Book chapter	NA	No	Animalia	Chordata	Mammalia	Rodentia	Muridae	Rattus	Rattus sp.		Rat	Terrestrial	Terrestrial			other			North America	United States of America		Diverse/Unspecified	Country	2007	Year	2007	Unspecified	2007	2007	Potentially ongoing	30000000000			3.54659e+10	3.54659e+10	30000000000	3.54659e+10	3.54659e+10	USD	2007
IC_1.0_593	604	TC	429	Mouse Plague Threat Continues to Build	Grains Research and Development Corporation		1993	English	Official report	Emmerson, G., & Mcculloch, J. (1994). FERAL PERIL: Queensland’s Introduced Plants and Animals, (28).	No	Animalia	Chordata	Mammalia	Rodentia	Muridae	Mus	Mus musculus		House mouse	Terrestrial	Terrestrial			other		Y	Oceania	Australia		Diverse/Unspecified	Country	1993	Year	1993	Unspecified	1993	1993	Potentially ongoing	100000000	50000000	100000000	1.15386e+08	1.29252e+08	100000000	1.15386e+08	1.29252e+08	AUD	1993
IC_1.0_594	606	TC	291	Environmental valuation and the Hawaiian economy	Kaiser et al		1999	English	Official report	IKUMA, E. K., SUGANO, D., & MARDFIN, J. K. (2002). Filling the Gaps in the Fight Against Invasive Species. Honolulu, Hawaii.	Yes	Animalia	Chordata	Mammalia	Rodentia	Muridae	Rattus	Rattus sp.		Rat	Terrestrial	Terrestrial			other		Y	Pacific Islands	United States of America	Hawaii	Hawaii	Site	Early 1990s	Year	1990	Unspecified	1990	1990	Potentially ongoing	8000000	6000000	10000000	1.50083e+07	1.50083e+07	8000000	1.50083e+07	1.50083e+07	USD	1990
[truncated: 333 more rows]
[truncated: 20 more columns]

## Sheet: Suitable subset
InvaCost_ID	Cost_ID	Repository	Reference_ID	Reference_title	Authors	Abstract	Publication_year	Language	Type_of_material	Previous_materials	Availability	Kingdom	Phylum	Class	Order	Family	Genus	Species	Subspecies	Common_name	Environment	Environment_IAS	HabitatVerbatim	Habitat	urbanArea	protectedArea	Island	Geographic_region	Official_country	State|Province|Administrative_area	Location	Spatial_scale	Period_of_estimation	Time_range	Probable_starting_year	Probable_ending_year	Probable_starting_year_adjusted	Probable_ending_year_adjusted	Occurrence	Raw_cost_estimate_original_currency	Min_Raw_cost_estimate_original_currency	Max_Raw_cost_estimate_original_currency	Raw_cost_estimate_2017_USD_exchange_rate	Raw_cost_estimate_2017_USD_PPP	Cost_estimate_per_year_original_currency	Cost_estimate_per_year_2017_USD_exchange_rate	Cost_estimate_per_year_2017_USD_PPP	Currency	Applicable_year
[truncated: 448 more rows]
[truncated: 20 more columns]

[truncated: 2 more sheets: Expanded subset, Conservative subset]
